# Supplementary material for: iTRAQ-Based Comparative Proteomics Analysis of Urolithiasis Rats Induced by Ethylene Glycol
Source: Biomed Res Int. 2020 May 15;2020:6137947. doi: 10.1155/2020/6137947 (PMC7246402; doi:10.1155/2020/6137947)
Supplement: Supplementary 1 — Supplementary table 1 Identified proteins in the kidney of nephrolithiasis rats and the control rats. [file 6137947.f1.xlsx]

## Sheet: Sheet1
Accession	Gena Name	Description	Coverage [%]	# Peptides	# PSMs	# Unique Peptides	# AAs	MW [kDa]	calc. pI	Score Sequest HT: Sequest HT	C2	C3	C6	C8	S12	S16	S17	S26
G3V6P7	Myh9	Myosin, heavy polypeptide 9, non-muscle OS=Rattus norvegicus OX=10116 GN=Myh9 PE=1 SV=1	53	102	402	4	1960	226.3	5.66	939.46	91.9	91.6	91.7	93.3	106.6	107.8	108.9	108.1
Q62812	Myh9	Myosin-9 OS=Rattus norvegicus OX=10116 GN=Myh9 PE=1 SV=3	48	96	385	1	1961	226.2	5.6	899.34	99.9	102.3	91.7	92.8	101.2	106.9	105.7	99.4
A0A0G2JZ69	Sptan1	Spectrin alpha chain, non-erythrocytic 1 OS=Rattus norvegicus OX=10116 GN=Sptan1 PE=1 SV=1	54	118	262	117	2489	286.5	5.39	646.4	98.7	98.6	98.7	100.5	100.9	101.3	101	100.4
A0A0G2K8W9	Sptbn1	Spectrin beta chain OS=Rattus norvegicus OX=10116 GN=Sptbn1 PE=1 SV=1	46	94	202	82	2358	273.3	5.64	422.02	100.1	101.2	99.3	99.5	99.7	100.1	99	100.9
G3V852	Tln1	RCG55135, isoform CRA_b OS=Rattus norvegicus OX=10116 GN=Tln1 PE=1 SV=1	45	87	196	78	2541	269.5	6.2	450.1	97.9	98.2	97	96.8	103.7	101.9	102.8	101.6
A0A0G2K9W7	Lrp2	Low-density lipoprotein receptor-related protein 2 OS=Rattus norvegicus OX=10116 GN=Lrp2 PE=1 SV=1	24	91	200	91	4660	519	5.24	452.44	100.4	100.6	100.4	102	100.2	98.8	98.1	99.5
F1M779	Cltc	Clathrin heavy chain OS=Rattus norvegicus OX=10116 GN=Cltc PE=1 SV=1	44	59	168	59	1675	191.4	5.69	409.8	95.9	96.5	97.2	97.9	102.6	103	103	103.9
C0JPT7	Flna	Filamin A OS=Rattus norvegicus OX=10116 GN=Flna PE=1 SV=1	39	78	178	68	2639	280.3	6.04	360.25	93.2	92.7	92.8	93.4	107.1	107.1	106.6	107.3
M0R9X8	Dync1h1	Cytoplasmic dynein 1 heavy chain 1 OS=Rattus norvegicus OX=10116 GN=Dync1h1 PE=1 SV=2	25	97	147	97	4644	531.7	6.42	322.72	101.4	98.9	97.8	96.5	101.1	101.5	101.1	101.7
P02770	Alb	Serum albumin OS=Rattus norvegicus OX=10116 GN=Alb PE=1 SV=2	62	42	331	2	608	68.7	6.48	833.9	100.1	99.7	97.9	102	98.2	99.9	100.3	101.8
A0A0G2JSH5	Alb	Serum albumin OS=Rattus norvegicus OX=10116 GN=Alb PE=1 SV=1	61	41	327	1	608	68.7	6.48	822.82	118	121.4	116.3	117.2	84.1	83.6	82.4	76.9
G3V6D3	Atp5f1b	ATP synthase subunit beta OS=Rattus norvegicus OX=10116 GN=Atp5f1b PE=1 SV=1	71	26	249	26	529	56.3	5.27	642.16	102.8	104.6	101.8	103.5	96.9	97.3	96.3	96.7
P06685	Atp1a1	Sodium/potassium-transporting ATPase subunit alpha-1 OS=Rattus norvegicus OX=10116 GN=Atp1a1 PE=1 SV=1	44	37	191	25	1023	113	5.45	490.23	101.7	102.2	101.4	101.6	97.6	99.5	97.3	98.7
Q6S3A0	Plec	Plectin OS=Rattus norvegicus OX=10116 GN=Plec PE=1 SV=1	26	97	128	96	4688	533.5	5.91	253.82	96.5	94.4	96.6	94.5	105	104.8	104.2	104.1
E9PTU4	Myh11	Myosin-11 OS=Rattus norvegicus OX=10116 GN=Myh11 PE=1 SV=2	33	58	142	40	1972	227.2	5.49	301.73	96.7	94	95.5	93.9	105	104.7	105.5	104.8
G3V7J0	Aldh6a1	Aldehyde dehydrogenase family 6, subfamily A1, isoform CRA_b OS=Rattus norvegicus OX=10116 GN=Aldh6a1 PE=1 SV=1	59	26	151	26	535	57.7	8.18	453.79	101.6	103.2	102.5	104	96.6	97.1	97	98
P63039	Hspd1	60 kDa heat shock protein, mitochondrial OS=Rattus norvegicus OX=10116 GN=Hspd1 PE=1 SV=1	62	28	151	28	573	60.9	6.18	439.78	114.9	100.9	99.2	100.1	95.9	95.8	97	96.3
Q9QXQ0	Actn4	Alpha-actinin-4 OS=Rattus norvegicus OX=10116 GN=Actn4 PE=1 SV=2	54	46	125	29	911	104.8	5.44	302.17	97.2	97.6	96.4	96.1	103.5	103.9	102.7	102.7
A0A0G2JXT8	Flnb	Filamin B OS=Rattus norvegicus OX=10116 GN=Flnb PE=1 SV=1	31	62	114	53	2602	277.7	5.67	236.54	96.4	97	97	95.9	103.5	102.6	104.8	102.9
Q9ER34	Aco2	Aconitate hydratase, mitochondrial OS=Rattus norvegicus OX=10116 GN=Aco2 PE=1 SV=2	48	32	152	32	780	85.4	7.83	384.45	102.8	103.3	100.5	103.6	97.4	98.1	97.3	97
M0RBF1	C3	Complement C3 OS=Rattus norvegicus OX=10116 GN=C3 PE=1 SV=1	38	51	113	51	1663	186.2	6.47	248.87	101.3	101.2	102.1	100.9	98.3	98.3	98	99.9
A0A0G2K8V2	Vcl	Vinculin OS=Rattus norvegicus OX=10116 GN=Vcl PE=1 SV=1	57	55	125	55	1134	123.5	5.71	298.79	98.6	97.3	96.5	96.6	102.4	102.3	103.4	102.9
A0A0G2JTL5	Pc	Pyruvate carboxylase, mitochondrial OS=Rattus norvegicus OX=10116 GN=Pc PE=1 SV=1	43	42	118	42	1277	139.9	6.77	268.26	101.5	98.7	100.9	99.1	99.4	101.1	99.9	99.5
P63018	Hspa8	Heat shock cognate 71 kDa protein OS=Rattus norvegicus OX=10116 GN=Hspa8 PE=1 SV=1	60	35	158	24	646	70.8	5.52	357.29	95.9	97.2	96.2	97.8	102.4	104.2	103.5	102.8
Q5XI78	Ogdh	2-oxoglutarate dehydrogenase, mitochondrial OS=Rattus norvegicus OX=10116 GN=Ogdh PE=1 SV=1	38	35	114	35	1023	116.2	6.77	231.81	103	98.9	100.5	100.1	99.8	98.7	99	99.9
A0A0G2JUA5	Ahnak	AHNAK nucleoprotein OS=Rattus norvegicus OX=10116 GN=Ahnak PE=1 SV=1	41	64	98	64	5450	580.8	6.14	178.67	93.4	93.9	95.2	92.7	105.6	106.2	108	105
Q6T487	Actn1	Alpha-actinin-1 OS=Rattus norvegicus OX=10116 GN=Actn1 PE=1 SV=1	47	37	95	20	914	105.4	5.39	246.2	95.2	93	96.1	93.4	107.3	106.1	104	104.9
P69897	Tubb5	Tubulin beta-5 chain OS=Rattus norvegicus OX=10116 GN=Tubb5 PE=1 SV=1	68	21	173	3	444	49.6	4.89	371.24	93.7	95.3	97	94.9	103.7	106.5	105.5	103.4
P15999	Atp5f1a	ATP synthase subunit alpha, mitochondrial OS=Rattus norvegicus OX=10116 GN=Atp5f1a PE=1 SV=2	56	28	180	28	553	59.7	9.19	469.87	100.4	104.1	101.3	104.2	96	100	96.9	97.3
M0R5J4		Uncharacterized protein OS=Rattus norvegicus OX=10116 PE=3 SV=1	53	18	149	13	434	47	6.37	408.6	98.6	99.6	99.8	100.6	99.8	103.2	100	98.4
P46462	Vcp	Transitional endoplasmic reticulum ATPase OS=Rattus norvegicus OX=10116 GN=Vcp PE=1 SV=3	60	39	117	39	806	89.3	5.26	242.88	95.9	96.8	97.4	97.6	103.3	102.4	103.4	103.2
Q64565	Agxt2	Alanine--glyoxylate aminotransferase 2, mitochondrial OS=Rattus norvegicus OX=10116 GN=Agxt2 PE=1 SV=2	55	24	133	24	512	57.2	8.07	312.56	103.4	103.2	102.8	103.1	96.3	95.9	96.8	98.4
Q66HT1	Aldob	Fructose-bisphosphate aldolase OS=Rattus norvegicus OX=10116 GN=Aldob PE=1 SV=1	67	23	167	22	364	39.5	8.4	465.25	100.1	99.2	97.8	101.7	100.3	99.6	100.7	100.6
G3V9Y1	Myh10	Myosin, heavy polypeptide 10, non-muscle, isoform CRA_b OS=Rattus norvegicus OX=10116 GN=Myh10 PE=1 SV=1	27	46	97	28	1976	228.9	5.54	216.57	97	97.9	99.9	95.9	103.7	101.3	101	103.3
P10860	Glud1	Glutamate dehydrogenase 1, mitochondrial OS=Rattus norvegicus OX=10116 GN=Glud1 PE=1 SV=2	44	23	109	23	558	61.4	8	284.8	103.8	105.2	103.5	104	96.4	96.4	95.2	95.5
A0A0G2K3K2	Actb	Actin, cytoplasmic 1 OS=Rattus norvegicus OX=10116 GN=Actb PE=1 SV=1	63	18	249	9	378	42.1	5.48	536.88	92.3	94	91.6	94.3	103.7	107.3	106.7	110.2
Q9JJ40	Pdzk1	Na(+)/H(+) exchange regulatory cofactor NHE-RF3 OS=Rattus norvegicus OX=10116 GN=Pdzk1 PE=1 SV=2	48	27	95	27	523	56.8	5.43	231.12	101.2	100.3	100.6	103.1	99.2	97.9	99.7	97.9
P85108	Tubb2a	Tubulin beta-2A chain OS=Rattus norvegicus OX=10116 GN=Tubb2a PE=1 SV=1	60	19	154	4	445	49.9	4.89	335.99	96	95.1	96.3	95.3	103.8	102.7	105.3	105.6
P97608	Oplah	5-oxoprolinase OS=Rattus norvegicus OX=10116 GN=Oplah PE=1 SV=2	38	36	73	36	1288	137.6	6.33	198.83	102	103.4	103	100.5	97.4	98.1	98.4	97.3
P04762	Cat	Catalase OS=Rattus norvegicus OX=10116 GN=Cat PE=1 SV=3	57	28	105	28	527	59.7	7.5	229.55	98.8	99.9	98.8	98.5	99.6	102	101.2	101.2
Q66HF1	Ndufs1	NADH-ubiquinone oxidoreductase 75 kDa subunit, mitochondrial OS=Rattus norvegicus OX=10116 GN=Ndufs1 PE=1 SV=1	50	29	88	29	727	79.4	5.9	227.19	101.7	101.7	102.1	102.2	98.5	98.1	98.7	96.9
P34058	Hsp90ab1	Heat shock protein HSP 90-beta OS=Rattus norvegicus OX=10116 GN=Hsp90ab1 PE=1 SV=4	48	30	105	17	724	83.2	5.03	246.7	95.1	98.2	98	97.2	102.3	104.2	102.4	102.6
B4F7C2	Tubb4a	Tubulin beta chain OS=Rattus norvegicus OX=10116 GN=Tubb4a PE=1 SV=1	61	19	149	3	444	49.6	4.88	308.43	96.6	98.2	96.6	97.2	103.9	104.6	100.8	102
Q6AYZ1	Tuba1c	Tubulin alpha-1C chain OS=Rattus norvegicus OX=10116 GN=Tuba1c PE=1 SV=1	53	16	103	7	449	49.9	5.1	302.8	93.3	97.8	94.9	96.1	103	108.5	104.9	101.5
A0A0G2K926	LOC297568	Murinoglobulin-1 OS=Rattus norvegicus OX=10116 GN=LOC297568 PE=1 SV=1	25	33	112	10	1477	163.6	6.01	233.03	106.4	105.7	105.2	105.7	94.8	94.1	93.5	94.6
Q63041	A1m	Alpha-1-macroglobulin OS=Rattus norvegicus OX=10116 GN=A1m PE=1 SV=1	28	35	80	35	1500	167	6.9	173.93	108.9	106.2	107.9	107.5	91.4	92.1	92.6	93.3
P50137	Tkt	Transketolase OS=Rattus norvegicus OX=10116 GN=Tkt PE=1 SV=1	52	29	82	1	623	67.6	7.49	179.85	72.9	117.5	105.1	73.3	95.9	154.2	88.1	92.9
Q5BJZ3	Nnt	Nicotinamide nucleotide transhydrogenase OS=Rattus norvegicus OX=10116 GN=Nnt PE=1 SV=1	30	32	87	32	1086	113.8	7.88	222.9	104.1	105.9	105.5	104.9	95.6	94.7	95.4	94
A0A096MK30	Msn	Moesin OS=Rattus norvegicus OX=10116 GN=Msn PE=1 SV=1	43	31	99	20	577	67.8	6.47	213.27	98.4	99.1	99.4	101	100.6	101.5	101	99
Q64057	Aldh7a1	Alpha-aminoadipic semialdehyde dehydrogenase OS=Rattus norvegicus OX=10116 GN=Aldh7a1 PE=1 SV=2	48	19	87	19	539	58.7	7.87	227.63	101.3	102	100.9	103.2	98.4	98.9	98.7	96.6
G3V826	Tkt	Transketolase OS=Rattus norvegicus OX=10116 GN=Tkt PE=1 SV=1	49	29	82	1	655	71.1	7.62	179.71	99.6	102.2	100	99.9	98.8	100.5	99.9	99
P28037	Aldh1l1	Cytosolic 10-formyltetrahydrofolate dehydrogenase OS=Rattus norvegicus OX=10116 GN=Aldh1l1 PE=1 SV=3	44	32	67	32	902	98.8	5.91	174.3	102.3	101	100.5	100.2	98.1	100.1	98.9	98.9
P19468	Gclc	Glutamate--cysteine ligase catalytic subunit OS=Rattus norvegicus OX=10116 GN=Gclc PE=1 SV=2	46	25	84	25	637	72.6	5.63	211.19	106.1	105.6	105.8	107.4	93.4	93.8	93.8	94.2
P56574	Idh2	Isocitrate dehydrogenase [NADP], mitochondrial OS=Rattus norvegicus OX=10116 GN=Idh2 PE=1 SV=2	53	26	115	24	452	50.9	8.69	259.11	102.5	102.8	102.4	105	96.7	97.2	96.7	96.8
Q03626	Mug1	Murinoglobulin-1 OS=Rattus norvegicus OX=10116 GN=Mug1 PE=2 SV=1	24	32	98	8	1487	165.2	6.01	211.1	100.5	102.6	106.3	104.1	99.3	96.2	96.9	94.2
P07379	Pck1	Phosphoenolpyruvate carboxykinase, cytosolic [GTP] OS=Rattus norvegicus OX=10116 GN=Pck1 PE=1 SV=1	48	23	76	23	622	69.4	6.49	207.14	103	101.7	102.2	102.3	97.1	99	97.6	97.2
A0A0G2K713	Hao2	Hydroxyacid oxidase 2 OS=Rattus norvegicus OX=10116 GN=Hao2 PE=1 SV=1	54	20	107	19	396	43.8	6.7	289.84	96.7	97	94.3	99.1	100.4	103.4	103.5	105.6
Q4KLZ6	Tkfc	Triokinase/FMN cyclase OS=Rattus norvegicus OX=10116 GN=Tkfc PE=1 SV=1	52	23	90	23	578	59.4	7.52	212.87	102.1	100.7	102.8	103.6	97.4	96.2	99.3	97.9
A0A140TA89	Gatm	Glycine amidinotransferase, mitochondrial OS=Rattus norvegicus OX=10116 GN=Gatm PE=1 SV=1	50	16	99	16	462	52.1	8.16	197.81	96.3	98.1	97.3	97.8	103.2	102.8	101.9	102.5
P12346	Tf	Serotransferrin OS=Rattus norvegicus OX=10116 GN=Tf PE=1 SV=3	40	28	91	1	698	76.3	7.28	228.45	96.4	102.9	100.2	98.4	99.1	105.7	101.2	96.1
A0A0G2QC06	Tf	Serotransferrin OS=Rattus norvegicus OX=10116 GN=Tf PE=1 SV=1	32	30	88	3	979	107.3	8.05	212.69	98.4	98.5	99.8	101.1	98.9	101.8	101	100.5
D4A5I9	Myo6	Myosin VI OS=Rattus norvegicus OX=10116 GN=Myo6 PE=1 SV=3	35	41	68	41	1285	148	8.41	148.16	98.4	96.9	98.4	98.5	101.4	101.4	102.7	102.3
Q5XIF6	Tuba4a	Tubulin alpha-4A chain OS=Rattus norvegicus OX=10116 GN=Tuba4a PE=1 SV=1	53	16	90	7	448	49.9	5.06	266.82	98.7	100.1	99.8	101	101.1	99.5	101.2	98.5
Q6AYS7	Acy1a	Aminoacylase-1A OS=Rattus norvegicus OX=10116 GN=Acy1a PE=1 SV=1	67	22	97	13	408	45.8	6.48	240.89	102.2	104	102.8	104.6	97.2	97.3	96.1	95.6
P04797	Gapdh	Glyceraldehyde-3-phosphate dehydrogenase OS=Rattus norvegicus OX=10116 GN=Gapdh PE=1 SV=3	63	15	121	1	333	35.8	8.03	328.63	98.8	110.5	98.1	104.4	102.2	97.6	95.2	93.2
P05197	Eef2	Elongation factor 2 OS=Rattus norvegicus OX=10116 GN=Eef2 PE=1 SV=4	39	29	75	28	858	95.2	6.83	188.78	94.8	94.7	92.1	94.4	103.9	105.9	110.1	104.2
A0A0G2JVH4	Immt	MICOS complex subunit MIC60 OS=Rattus norvegicus OX=10116 GN=Immt PE=1 SV=1	39	28	80	28	776	86.2	5.85	203.06	101.5	101.4	102.2	103.2	100.6	97.4	97.2	96.5
F1LTJ5		Uncharacterized protein OS=Rattus norvegicus OX=10116 PE=1 SV=3	20	33	64	33	2449	262.9	5.99	144.57	98	98.9	95.6	95.8	101.8	101.4	103.2	105.4
P06761	Hspa5	Endoplasmic reticulum chaperone BiP OS=Rattus norvegicus OX=10116 GN=Hspa5 PE=1 SV=1	47	30	84	27	654	72.3	5.16	220.05	95.7	96.1	96.6	97	102.9	104.7	104	103
M0R757	LOC100360413	Elongation factor 1-alpha OS=Rattus norvegicus OX=10116 GN=LOC100360413 PE=3 SV=1	44	15	99	15	462	50.1	9.01	257.7	93.2	96.5	93.6	96.3	104.5	107.7	103.4	104.9
P16617	Pgk1	Phosphoglycerate kinase 1 OS=Rattus norvegicus OX=10116 GN=Pgk1 PE=1 SV=2	58	21	77	21	417	44.5	7.9	195.85	101.7	98.8	98.3	100.4	100.1	99.8	100.5	100.3
Q64573		Liver carboxylesterase 4 OS=Rattus norvegicus OX=10116 PE=2 SV=2	47	21	87	11	561	62.3	6.76	198.47	102.5	102.6	102.2	100.2	97.5	99.1	98.2	97.8
P45953	Acadvl	Very long-chain specific acyl-CoA dehydrogenase, mitochondrial OS=Rattus norvegicus OX=10116 GN=Acadvl PE=1 SV=1	51	28	66	28	655	70.7	8.9	152.42	102	101.9	100.9	101.5	98.5	99.1	98.3	97.8
A0A140TAE0	Mvp	Major vault protein OS=Rattus norvegicus OX=10116 GN=Mvp PE=1 SV=1	41	27	66	27	871	96.8	5.63	147.25	95.9	97.3	99.5	98.1	103.7	103.3	102.2	100.1
F1LRT1	Fbp1	Fructose-1,6-bisphosphatase 1 OS=Rattus norvegicus OX=10116 GN=Fbp1 PE=1 SV=3	54	20	95	20	363	39.6	5.77	204.21	104	102.5	103	104	95.8	96.6	97.2	96.8
G3V6S2	Aco1	Cytoplasmic aconitate hydratase OS=Rattus norvegicus OX=10116 GN=Aco1 PE=1 SV=1	43	32	69	31	889	98.1	7.39	163.3	102.7	104.1	103.4	103.1	98	98.3	95.1	95.4
Q68FS4	Lap3	Cytosol aminopeptidase OS=Rattus norvegicus OX=10116 GN=Lap3 PE=1 SV=1	59	26	72	26	519	56.1	7.21	163.4	100.1	100	101.6	99.5	101.2	100.1	100	97.6
B5DFA0	Vil1	Vil1 protein OS=Rattus norvegicus OX=10116 GN=Vil1 PE=1 SV=1	41	26	68	26	827	92.6	5.87	163.11	100.1	99.5	100.8	99.9	100.5	100.6	100.9	97.8
Q64428	Hadha	Trifunctional enzyme subunit alpha, mitochondrial OS=Rattus norvegicus OX=10116 GN=Hadha PE=1 SV=2	45	27	84	27	763	82.6	9.06	169.84	108.2	101.2	104	104.4	95.4	97	95.2	94.5
F1M953	Hspa9	Stress-70 protein, mitochondrial OS=Rattus norvegicus OX=10116 GN=Hspa9 PE=1 SV=1	40	26	85	25	679	73.7	6.16	186.51	99.5	98.8	100.9	100.8	99.7	100.6	100.4	99.2
M0R660		Glyceraldehyde-3-phosphate dehydrogenase OS=Rattus norvegicus OX=10116 PE=1 SV=1	59	15	133	2	333	35.8	8.25	358.4	96.9	98.5	95.1	100	101.2	103.5	101.6	103.3
P11884	Aldh2	Aldehyde dehydrogenase, mitochondrial OS=Rattus norvegicus OX=10116 GN=Aldh2 PE=1 SV=1	48	21	88	1	519	56.5	7.05	239.55	105.9	105.6	106.6	106.9	92.7	91.2	95.2	95.9
A0A0G2JVG3	Pkm	Pyruvate kinase OS=Rattus norvegicus OX=10116 GN=Pkm PE=1 SV=1	53	25	65	3	489	53.2	7.83	160.88	89.4	97.5	101.8	97.2	104.2	110.3	102.8	96.8
P04636	Mdh2	Malate dehydrogenase, mitochondrial OS=Rattus norvegicus OX=10116 GN=Mdh2 PE=1 SV=2	65	18	112	18	338	35.7	8.68	297.34	102.4	101.8	101.2	103.4	97.6	97.5	98.1	98
P11980	Pkm	Pyruvate kinase PKM OS=Rattus norvegicus OX=10116 GN=Pkm PE=1 SV=3	51	27	65	4	531	57.8	7.06	160.25	95.3	95	95.2	94.8	104.4	105	105.3	104.9
B0BMW2	Hsd17b10	3-hydroxyacyl-CoA dehydrogenase type-2 OS=Rattus norvegicus OX=10116 GN=Hsd17b10 PE=1 SV=1	89	17	66	17	261	27.2	8.59	201.98	103.9	103.3	103.4	103.3	96.6	94.5	96.6	98.3
Q920L2	Sdha	Succinate dehydrogenase [ubiquinone] flavoprotein subunit, mitochondrial OS=Rattus norvegicus OX=10116 GN=Sdha PE=1 SV=1	50	26	80	26	656	71.6	7.17	169.57	100.8	102.3	100.9	102.3	99	99.3	98.4	97.1
F1LN88	Aldh2	Aldehyde dehydrogenase, mitochondrial OS=Rattus norvegicus OX=10116 GN=Aldh2 PE=1 SV=2	48	21	84	1	519	56.5	7.33	221.58	100.5	101.4	101.8	101.4	98.2	99.2	99.2	98.3
P51635	Akr1a1	Alcohol dehydrogenase [NADP(+)] OS=Rattus norvegicus OX=10116 GN=Akr1a1 PE=1 SV=2	67	18	103	17	325	36.5	7.31	245.5	101.3	104.8	102.3	104.2	97.1	96.9	97.1	96.4
G3V9M6	Fbn1	Fibrillin 1 OS=Rattus norvegicus OX=10116 GN=Fbn1 PE=1 SV=1	18	37	60	37	2872	311.7	4.93	95.28	90.2	89.5	90.4	90.2	108.1	109	111.8	110.8
P31977	Ezr	Ezrin OS=Rattus norvegicus OX=10116 GN=Ezr PE=1 SV=3	40	28	91	18	586	69.3	6.1	192.96	99.1	99.5	98.8	101.3	100.9	99.8	100.5	100
A0A0H2UHP1	Aldh1a1	Retinal dehydrogenase 1 OS=Rattus norvegicus OX=10116 GN=Aldh1a1 PE=1 SV=1	54	22	75	21	521	56.6	7.8	169.21	102.4	102.6	102.7	105.7	96.8	97.5	96.6	95.6
G3V9U2	Acaa2	3-ketoacyl-CoA thiolase, mitochondrial OS=Rattus norvegicus OX=10116 GN=Acaa2 PE=1 SV=3	75	21	60	21	397	41.9	8.15	148.45	108	107.5	109.2	108.8	92.6	90.6	91.2	91.9
Q6Q0N1	Cndp2	Cytosolic non-specific dipeptidase OS=Rattus norvegicus OX=10116 GN=Cndp2 PE=1 SV=1	55	20	67	20	475	52.7	5.66	156.02	98.8	99	99.1	99.1	100.4	101.8	100.9	100.8
G3V8L3	Lmna	Lamin A, isoform CRA_b OS=Rattus norvegicus OX=10116 GN=Lmna PE=1 SV=1	48	30	67	29	665	74.3	6.98	160.02	91.3	95.3	95.5	90.7	106.3	108	105.9	107
P11517		Hemoglobin subunit beta-2 OS=Rattus norvegicus OX=10116 PE=1 SV=2	87	13	200	4	147	16	8.79	612.2	126.5	132	123.4	130.4	70.7	70.6	70.6	75.7
A0A0A0MY09	Hsp90b1	Endoplasmin OS=Rattus norvegicus OX=10116 GN=Hsp90b1 PE=1 SV=1	36	27	64	25	804	92.8	4.81	145.71	94.6	92.7	92.7	94	105.1	106	107.6	107.4
G3V6S5	Mthfd1	C-1-tetrahydrofolate synthase, cytoplasmic OS=Rattus norvegicus OX=10116 GN=Mthfd1 PE=1 SV=1	42	32	62	32	935	100.9	7.42	123.54	98.2	102.8	102.2	102.1	98.4	97.9	99.2	99.3
A0A0G2JSW3	Hbb	Globin a4 OS=Rattus norvegicus OX=10116 GN=Hbb PE=1 SV=1	88	13	212	4	147	16	8.07	606.99	122.5	131.2	118.4	126.1	74.7	76.3	74	76.8
Q6IN39	Hsd17b4	Hsd17b4 protein OS=Rattus norvegicus OX=10116 GN=Hsd17b4 PE=1 SV=1	34	23	64	23	751	81	8.48	143.53	99.8	97.4	98.7	99.9	101.5	100.3	100.1	102.3
Q5SGE0	Lrpprc	Leucine-rich PPR motif-containing protein, mitochondrial OS=Rattus norvegicus OX=10116 GN=Lrpprc PE=1 SV=1	29	39	55	39	1392	156.6	6.61	120.34	106	100.5	98.8	98.1	100.1	98.5	98.4	99.6
Q5XIM9	Cct2	T-complex protein 1 subunit beta OS=Rattus norvegicus OX=10116 GN=Cct2 PE=1 SV=3	48	22	51	22	535	57.4	6.46	111.09	97.9	96.4	101.1	97.7	101.7	101.2	102	102
Q64319	Slc3a1	Neutral and basic amino acid transport protein rBAT OS=Rattus norvegicus OX=10116 GN=Slc3a1 PE=1 SV=1	35	23	83	23	683	78.5	5.76	163.06	112.6	112.7	111.9	112.6	89.5	88.3	86.4	86
P07896	Ehhadh	Peroxisomal bifunctional enzyme OS=Rattus norvegicus OX=10116 GN=Ehhadh PE=1 SV=2	44	28	70	28	722	78.6	9.2	156.06	119.7	108.1	107	109.6	89.6	89.9	87.8	88.2
A0A0G2KAJ7	Col12a1	Collagen alpha-1(XII) chain OS=Rattus norvegicus OX=10116 GN=Col12a1 PE=1 SV=1	16	43	62	41	3143	342.3	5.64	114.59	90.1	89	90	86.9	109.9	111.9	110.8	111.3
P00507	Got2	Aspartate aminotransferase, mitochondrial OS=Rattus norvegicus OX=10116 GN=Got2 PE=1 SV=2	54	22	82	22	430	47.3	9	200.79	100.1	102.6	100.7	100.8	99	100.2	98.3	98.3
P82995	Hsp90aa1	Heat shock protein HSP 90-alpha OS=Rattus norvegicus OX=10116 GN=Hsp90aa1 PE=1 SV=3	37	26	85	15	733	84.8	5.01	202.83	97.5	104.2	99.2	100.5	98.7	102.8	98.8	98.2
B2GV06	Oxct1	Succinyl-CoA:3-ketoacid coenzyme A transferase 1, mitochondrial OS=Rattus norvegicus OX=10116 GN=Oxct1 PE=1 SV=1	39	16	66	16	520	56.2	8.47	138.57	103.9	103.5	102.1	103.5	96.6	97.6	96.7	96.1
P05065	Aldoa	Fructose-bisphosphate aldolase A OS=Rattus norvegicus OX=10116 GN=Aldoa PE=1 SV=2	60	18	73	16	364	39.3	8.09	191.79	95.3	95.4	95.7	96.9	103.9	104.1	103.9	104.7
D3ZXY4	Aldh8a1	Aldehyde dehydrogenase 8 family, member A1 OS=Rattus norvegicus OX=10116 GN=Aldh8a1 PE=1 SV=2	52	18	68	18	487	53.5	7.34	178.31	101.9	102.1	100.9	103.8	97.1	97.5	98.5	98.1
A0A0H2UHM5	Pdia3	Protein disulfide-isomerase OS=Rattus norvegicus OX=10116 GN=Pdia3 PE=1 SV=1	40	17	50	17	510	57	6.21	128.43	96.5	94.6	93.8	98.3	103.1	104.9	103.6	105.3
Q6P502	Cct3	T-complex protein 1 subunit gamma OS=Rattus norvegicus OX=10116 GN=Cct3 PE=1 SV=1	52	26	60	26	545	60.6	6.64	131.63	96.6	99.3	99.3	98.7	101.1	102.6	102.7	99.6
G3V7Q7	Iqgap1	IQ motif containing GTPase activating protein 1 (Predicted), isoform CRA_b OS=Rattus norvegicus OX=10116 GN=Iqgap1 PE=1 SV=1	27	33	51	32	1657	188.7	6.43	105.29	95.8	97.8	97.6	95.7	103.7	101.3	104.4	103.6
F1LPD6	Acaa1a	3-ketoacyl-CoA thiolase A, peroxisomal OS=Rattus norvegicus OX=10116 GN=Acaa1a PE=1 SV=2	49	17	50	1	433	44.5	9.01	124.03	105	104.3	104.4	105	95.8	93.5	95	97.1
G3V8C3	Vim	Vimentin OS=Rattus norvegicus OX=10116 GN=Vim PE=1 SV=1	56	27	58	22	466	53.7	5.12	143.7	88	88.5	88.5	88.8	111.2	110.6	112	112.4
P15684	Anpep	Aminopeptidase N OS=Rattus norvegicus OX=10116 GN=Anpep PE=1 SV=2	31	24	59	4	965	109.4	5.47	110.18	115.4	117.1	117.7	116.2	85.7	83.8	82.4	81.8
A0A0G2JVE6	Anpep	Aminopeptidase OS=Rattus norvegicus OX=10116 GN=Anpep PE=1 SV=1	31	23	60	3	965	109.4	5.47	113.64	90.4	91.2	91.1	91.7	102.7	107.5	114.3	111.1
F1LRJ9	Selenbp1	Methanethiol oxidase OS=Rattus norvegicus OX=10116 GN=Selenbp1 PE=1 SV=2	44	18	52	18	496	55.1	6.86	133.97	100.3	99.6	100.8	100.4	100.2	100.4	99	99.3
A0A0G2JSV6	Hba-a2	Globin c2 OS=Rattus norvegicus OX=10116 GN=Hba-a2 PE=1 SV=1	84	10	233	8	142	15.3	8.31	637.17	124.5	130.1	119.5	129	72	74.1	73	77.8
P07871	Acaa1b	3-ketoacyl-CoA thiolase B, peroxisomal OS=Rattus norvegicus OX=10116 GN=Acaa1b PE=1 SV=2	50	17	50	1	424	43.8	8.22	123.15	110.3	108.5	105.4	104.6	96	91.5	85.8	97.8
D3ZA84	Tln2	Talin 2 OS=Rattus norvegicus OX=10116 GN=Tln2 PE=1 SV=3	19	36	52	26	2542	271.5	5.55	113.54	99.4	95.4	96.9	98.8	102.8	101.8	103.7	101.2
F1LNU2	Cubn	Cubilin OS=Rattus norvegicus OX=10116 GN=Cubn PE=1 SV=3	10	30	49	30	3623	398.8	5.68	108.27	98	99.7	102.7	101.2	103.9	97.2	98	99.3
P41562	Idh1	Isocitrate dehydrogenase [NADP] cytoplasmic OS=Rattus norvegicus OX=10116 GN=Idh1 PE=1 SV=1	56	21	63	19	414	46.7	6.99	166.41	100.4	101.8	98.9	102.5	97.9	100.3	98.9	99.3
D3ZFU9	Mylk	Myosin light chain kinase OS=Rattus norvegicus OX=10116 GN=Mylk PE=1 SV=2	22	32	46	31	1961	214.8	6.02	91.8	98	97.7	98	96	103	101.3	102.8	103.1
P10760	Ahcy	Adenosylhomocysteinase OS=Rattus norvegicus OX=10116 GN=Ahcy PE=1 SV=3	47	20	68	18	432	47.5	6.54	166.6	99.5	98.9	97.9	101	100.4	99.8	102	100.5
P62738	Acta2	Actin, aortic smooth muscle OS=Rattus norvegicus OX=10116 GN=Acta2 PE=2 SV=1	44	14	160	5	377	42	5.39	365.98	92.5	100.1	90.4	95.5	104.7	110.4	103.1	103.2
P04785	P4hb	Protein disulfide-isomerase OS=Rattus norvegicus OX=10116 GN=P4hb PE=1 SV=2	51	22	72	21	509	56.9	4.93	178.54	95.3	96.3	95.6	96	103.5	105.9	104.5	103.1
P11507	Atp2a2	Sarcoplasmic/endoplasmic reticulum calcium ATPase 2 OS=Rattus norvegicus OX=10116 GN=Atp2a2 PE=1 SV=1	29	27	51	27	1043	114.7	5.34	100.63	101.4	99.1	98.6	98	100.1	101	99.2	102.7
Q6UPE0	Chdh	Choline dehydrogenase, mitochondrial OS=Rattus norvegicus OX=10116 GN=Chdh PE=1 SV=1	44	21	58	21	599	66.3	8.47	124.45	102.4	102.2	104	100.7	98.1	99.2	97.5	96.1
P85834	Tufm	Elongation factor Tu, mitochondrial OS=Rattus norvegicus OX=10116 GN=Tufm PE=1 SV=1	55	19	54	19	452	49.5	7.56	133.2	99	102.1	101.4	103	100.8	97.4	98.4	98
P20816	Cyp4a2	Cytochrome P450 4A2 OS=Rattus norvegicus OX=10116 GN=Cyp4a2 PE=1 SV=2	38	19	86	6	504	57.9	9.1	184.75	101.9	102.1	102.3	104.3	97.3	97.6	96.7	97.8
Q6P6V0	Gpi	Glucose-6-phosphate isomerase OS=Rattus norvegicus OX=10116 GN=Gpi PE=1 SV=1	40	21	72	21	558	62.8	7.77	157.28	98.8	97.4	98.3	98.8	102.1	101.2	102.1	101.3
A0A096P6L8	Fn1	Fibronectin OS=Rattus norvegicus OX=10116 GN=Fn1 PE=1 SV=2	16	30	53	30	2477	272.3	5.67	106.62	100.7	97.4	97.8	94.3	102.3	101.9	102.6	103
Q5U300	Uba1	Ubiquitin-like modifier-activating enzyme 1 OS=Rattus norvegicus OX=10116 GN=Uba1 PE=1 SV=1	27	22	51	22	1058	117.7	5.57	109.41	98.7	99.1	100.9	95.3	102.4	102.1	101.2	100.2
F1LRV4	Hspa4	Heat shock 70 kDa protein 4 OS=Rattus norvegicus OX=10116 GN=Hspa4 PE=1 SV=1	37	26	49	24	840	94	5.21	114.51	98.7	96.2	98.3	96.4	102	101.9	102.3	104.3
P50399	Gdi2	Rab GDP dissociation inhibitor beta OS=Rattus norvegicus OX=10116 GN=Gdi2 PE=1 SV=2	47	21	52	17	445	50.5	6.25	108.86	98.1	98.2	98	100.9	101.4	100.5	101.5	101.6
O70490	Acsm2	Acyl-coenzyme A synthetase ACSM2, mitochondrial OS=Rattus norvegicus OX=10116 GN=Acsm2 PE=2 SV=2	43	19	71	19	572	64.1	8.31	156.35	102	102.2	101.6	102.6	97.6	98.6	98.5	97
P48500	Tpi1	Triosephosphate isomerase OS=Rattus norvegicus OX=10116 GN=Tpi1 PE=1 SV=2	84	16	59	16	249	26.8	7.24	162.97	99	98.4	97.9	99	101.7	102.1	100.2	101.7
F1LQS6	Xdh	RCG61833 OS=Rattus norvegicus OX=10116 GN=Xdh PE=1 SV=2	27	27	44	26	1331	146.2	7.25	104.8	99.2	97.7	98.7	97.9	102.6	100.2	102.4	101.5
Q68FU3	Etfb	Electron transfer flavoprotein subunit beta OS=Rattus norvegicus OX=10116 GN=Etfb PE=1 SV=3	56	14	56	14	255	27.7	7.75	172.53	102.2	102	100.8	101.6	97.7	99.7	98	97.9
Q9Z2L0	Vdac1	Voltage-dependent anion-selective channel protein 1 OS=Rattus norvegicus OX=10116 GN=Vdac1 PE=1 SV=4	66	16	67	16	283	30.7	8.54	190.55	103.2	102.6	100.2	102.3	96.3	98.7	97.8	98.8
Q5RJR9	Serpinh1	Serine (Or cysteine) proteinase inhibitor, clade H, member 1, isoform CRA_b OS=Rattus norvegicus OX=10116 GN=Serpinh1 PE=1 SV=1	45	16	44	16	417	46.5	8.82	127.21	94.9	94.3	91.6	90.8	106.7	110	105.9	105.9
G3V9N8	Ap1b1	AP complex subunit beta OS=Rattus norvegicus OX=10116 GN=Ap1b1 PE=1 SV=3	38	27	44	17	949	104.5	5.1	105.5	97.7	102.8	100.6	98.7	100.8	102.5	99.3	97.6
Q64602	Aadat	Kynurenine/alpha-aminoadipate aminotransferase, mitochondrial OS=Rattus norvegicus OX=10116 GN=Aadat PE=1 SV=1	40	15	72	15	425	47.8	7.96	157.24	100.6	105.3	102	102.8	96.4	100.3	96.5	96.1
Q9JM53	Aifm1	Apoptosis-inducing factor 1, mitochondrial OS=Rattus norvegicus OX=10116 GN=Aifm1 PE=1 SV=1	34	19	44	19	612	66.7	8.97	121.17	101.1	102.2	104.4	103.4	99.1	97.4	96.4	96.1
P42123	Ldhb	L-lactate dehydrogenase B chain OS=Rattus norvegicus OX=10116 GN=Ldhb PE=1 SV=2	46	15	73	13	334	36.6	6.05	170.87	101.7	98.3	99.2	102	100.7	98.7	99.5	100
Q6P6R2	Dld	Dihydrolipoyl dehydrogenase, mitochondrial OS=Rattus norvegicus OX=10116 GN=Dld PE=1 SV=1	44	16	63	16	509	54	7.87	163.21	103.5	99.5	100.9	104.3	97.6	97.6	99	97.5
P14408	Fh	Fumarate hydratase, mitochondrial OS=Rattus norvegicus OX=10116 GN=Fh PE=1 SV=1	49	18	52	18	507	54.4	8.95	119.44	98.9	101.9	103	101.1	97.5	99.5	98.4	99.7
P13803	Etfa	Electron transfer flavoprotein subunit alpha, mitochondrial OS=Rattus norvegicus OX=10116 GN=Etfa PE=1 SV=4	62	15	57	15	333	34.9	8.38	144.4	101.4	102.7	100.1	104.2	96.7	98.7	97.8	98.4
O70511	Ank3	Ankyrin-3 OS=Rattus norvegicus OX=10116 GN=Ank3 PE=1 SV=3	12	25	44	23	2622	284.3	7.9	99.44	101.1	103.9	104.4	100.6	99.6	97.3	97.8	95.3
D4A133	Atp6v1a	ATPase H+-transporting V1 subunit A OS=Rattus norvegicus OX=10116 GN=Atp6v1a PE=1 SV=1	41	22	57	22	617	68.2	5.58	118.78	104.9	98.3	101.5	101	98.4	96.7	99.7	99.5
Q66HM2	Ap2a2	AP-2 complex subunit alpha OS=Rattus norvegicus OX=10116 GN=Ap2a2 PE=1 SV=1	30	23	42	18	939	104.1	6.83	97.19	108.8	96.6	95.2	94.9	101.6	100.6	101.3	101
P00502	Gsta1	Glutathione S-transferase alpha-1 OS=Rattus norvegicus OX=10116 GN=Gsta1 PE=1 SV=3	42	11	80	3	222	25.6	8.79	165.28	100.2	103.7	98.9	102.5	96.2	101.7	98.4	98.5
Q5M7T9	Thnsl2	Threonine synthase-like 2 OS=Rattus norvegicus OX=10116 GN=Thnsl2 PE=2 SV=1	41	15	40	15	485	54.1	6.61	109.06	101.8	100.5	101.7	103	98	98.6	98.5	98
P08461	Dlat	Dihydrolipoyllysine-residue acetyltransferase component of pyruvate dehydrogenase complex, mitochondrial OS=Rattus norvegicus OX=10116 GN=Dlat PE=1 SV=3	38	17	52	17	632	67.1	8.53	139.85	101.8	100.7	102.5	100.6	98.7	98	98.6	99.1
P07861	Mme	Neprilysin OS=Rattus norvegicus OX=10116 GN=Mme PE=1 SV=2	31	19	50	19	750	85.7	6.01	96.14	103.3	106.3	108.7	104.6	94.6	95.1	95.5	92
O08557	Ddah1	N(G),N(G)-dimethylarginine dimethylaminohydrolase 1 OS=Rattus norvegicus OX=10116 GN=Ddah1 PE=1 SV=3	61	17	48	16	285	31.4	6.13	98.91	100.9	102	103.7	101.2	99.1	97.4	98.8	96.8
P20059	Hpx	Hemopexin OS=Rattus norvegicus OX=10116 GN=Hpx PE=1 SV=3	35	17	82	17	460	51.3	7.65	221.88	101.2	100.7	100.2	100.3	98.9	99.2	99.1	100.4
P17764	Acat1	Acetyl-CoA acetyltransferase, mitochondrial OS=Rattus norvegicus OX=10116 GN=Acat1 PE=1 SV=1	49	15	61	15	424	44.7	8.76	158.67	102.2	100	99	105.3	100.4	99.2	97.7	96.1
Q924S5	Lonp1	Lon protease homolog, mitochondrial OS=Rattus norvegicus OX=10116 GN=Lonp1 PE=2 SV=1	30	23	43	23	950	105.7	6.6	94.21	98.7	100	100.2	98.3	99.3	101.8	99.5	102.2
P27139	Ca2	Carbonic anhydrase 2 OS=Rattus norvegicus OX=10116 GN=Ca2 PE=1 SV=2	34	8	50	8	260	29.1	7.4	150.47	103.2	103.3	103.1	104.6	95.5	96.8	97.2	96.3
P04182	Oat	Ornithine aminotransferase, mitochondrial OS=Rattus norvegicus OX=10116 GN=Oat PE=1 SV=1	46	15	47	15	439	48.3	6.99	121.48	99.9	99.5	100.6	101.8	97.6	100.6	99.4	100.5
Q9WUW9	Sult1c2a	Sulfotransferase 1C2A OS=Rattus norvegicus OX=10116 GN=Sult1c2a PE=2 SV=2	58	18	58	11	296	34.8	7.4	111	103	102.4	103.8	105.7	96.3	94.9	97.5	96.5
D3ZN27	Dnajc13	DnaJ heat shock protein family (Hsp40) member C13 OS=Rattus norvegicus OX=10116 GN=Dnajc13 PE=1 SV=2	16	30	48	30	2243	254.3	6.77	91.42	102.6	102.9	103.1	100.3	99.2	97.9	96.9	97.2
Q6AYT0	Cryz	Quinone oxidoreductase OS=Rattus norvegicus OX=10116 GN=Cryz PE=2 SV=1	55	15	42	15	329	35	8.22	108.85	106.2	105.2	103.7	105.1	94.4	94.5	95.7	95.2
P09034	Ass1	Argininosuccinate synthase OS=Rattus norvegicus OX=10116 GN=Ass1 PE=1 SV=1	52	19	61	19	412	46.5	7.78	131.6	103.1	103.4	100.1	103.3	96.6	100.4	97.7	95.5
F1LM05	LOC299282	Serine protease inhibitor A3N OS=Rattus norvegicus OX=10116 GN=LOC299282 PE=1 SV=1	34	17	46	4	610	68.1	5.45	99.7	95.5	94.1	96.1	102.8	107.1	101.4	101.8	101.2
P48037	Anxa6	Annexin A6 OS=Rattus norvegicus OX=10116 GN=Anxa6 PE=1 SV=2	42	27	47	26	673	75.7	5.57	96.51	93	92.6	92.2	94.8	108.3	106.8	106.3	106
A0A0G2K3Z9		Uncharacterized protein OS=Rattus norvegicus OX=10116 PE=4 SV=1	73	13	60	11	199	22.2	8.4	131.62	99.2	98.2	96.8	101.3	99.8	101.3	101.3	102.1
Q68FQ0	Cct5	T-complex protein 1 subunit epsilon OS=Rattus norvegicus OX=10116 GN=Cct5 PE=1 SV=1	53	26	46	25	541	59.5	5.72	93.75	96.2	95.5	98.5	97.8	102.9	103.6	102.1	103.4
P25093	Fah	Fumarylacetoacetase OS=Rattus norvegicus OX=10116 GN=Fah PE=1 SV=1	45	14	37	14	419	45.9	7.17	101.8	100.6	103.2	104.1	101.4	94.7	100.4	103.1	92.4
P63245	Rack1	Receptor of activated protein C kinase 1 OS=Rattus norvegicus OX=10116 GN=Rack1 PE=1 SV=3	67	17	43	17	317	35.1	7.69	99.16	94.7	97.6	97	96.4	102.4	107	102.6	102.4
Q09073	Slc25a5	ADP/ATP translocase 2 OS=Rattus norvegicus OX=10116 GN=Slc25a5 PE=1 SV=3	56	18	79	7	298	32.9	9.73	168.9	102.8	103	101.2	104.2	97	95.8	97	98.9
O88767	Park7	Protein/nucleic acid deglycase DJ-1 OS=Rattus norvegicus OX=10116 GN=Park7 PE=1 SV=1	69	13	51	13	189	20	6.77	116.37	100.7	100.4	100	99.8	100	99.3	100.5	99.4
G3V699	Sec31a	Protein transport protein Sec31A OS=Rattus norvegicus OX=10116 GN=Sec31a PE=1 SV=1	22	24	40	24	1249	135.1	6.93	87.16	98	97.6	98.9	99.5	99.9	101.7	101.7	102.7
Q5U302	Ctnna1	Catenin (Cadherin associated protein), alpha 1 OS=Rattus norvegicus OX=10116 GN=Ctnna1 PE=1 SV=1	36	25	44	22	908	100.2	6.23	90.19	99.9	96.1	99.9	97.9	102.2	102.9	101	100.1
Q63010		Liver carboxylesterase B-1 OS=Rattus norvegicus OX=10116 PE=1 SV=1	37	18	59	8	561	62.5	6.71	123.08	112.1	111.6	108.4	112.7	88.9	88.9	90.2	87.2
P18418	Calr	Calreticulin OS=Rattus norvegicus OX=10116 GN=Calr PE=1 SV=1	44	17	48	17	416	48	4.49	90.99	94.5	96	95.2	97	104.3	104.7	104.6	103.7
Q641Z6	Ehd1	EH domain-containing protein 1 OS=Rattus norvegicus OX=10116 GN=Ehd1 PE=1 SV=1	63	29	49	14	534	60.6	6.83	84.68	101.6	106.4	104.7	103.6	95.2	98.8	95.5	94.2
P18163	Acsl1	Long-chain-fatty-acid--CoA ligase 1 OS=Rattus norvegicus OX=10116 GN=Acsl1 PE=1 SV=1	39	21	43	21	699	78.1	6.99	100.78	105.9	108	108	106.8	94.2	92.3	92.9	91.9
Q7TPB1	Cct4	T-complex protein 1 subunit delta OS=Rattus norvegicus OX=10116 GN=Cct4 PE=1 SV=3	43	20	35	19	539	58.1	8.02	88.35	99.4	97.8	98.3	97.6	103.3	101.4	102.1	100.2
A0A0G2K9I6	Cp	Ceruloplasmin OS=Rattus norvegicus OX=10116 GN=Cp PE=1 SV=1	23	23	43	23	1084	123.6	5.68	98.38	98.6	97.8	96.5	96.5	102.3	101.8	102.5	104
A0A0G2K238	Dpp4	Dipeptidyl peptidase 4 OS=Rattus norvegicus OX=10116 GN=Dpp4 PE=1 SV=1	27	20	55	3	789	90.6	6.4	136.58	104.1	103	103	106.2	97.2	95.5	95.7	95.2
A0A0G2JSI1	Aldh9a1	4-trimethylaminobutyraldehyde dehydrogenase OS=Rattus norvegicus OX=10116 GN=Aldh9a1 PE=1 SV=1	32	14	50	14	497	54	6.67	119.15	99.5	100.5	98.7	103.1	99.9	98.1	98.6	101.5
E9PT65	Rdx	Radixin OS=Rattus norvegicus OX=10116 GN=Rdx PE=1 SV=2	26	15	45	9	583	68.4	5.74	84.8	98.8	99.5	102.7	100.8	103.6	98.2	97.9	98.3
A0A0G2QC04	Pls1	Plastin 1 OS=Rattus norvegicus OX=10116 GN=Pls1 PE=1 SV=1	38	20	47	17	630	70.3	5.48	100.28	103.5	100.5	99.8	99.1	98.5	99.8	98.8	99.9
P15650	Acadl	Long-chain specific acyl-CoA dehydrogenase, mitochondrial OS=Rattus norvegicus OX=10116 GN=Acadl PE=1 SV=1	37	14	52	14	430	47.8	7.74	140.18	105.3	102.1	104.1	105.4	96.2	95.5	96.4	95.2
Q2TA68	Opa1	Dynamin-like 120 kDa protein, mitochondrial OS=Rattus norvegicus OX=10116 GN=Opa1 PE=1 SV=1	30	25	42	25	960	111.2	7.53	77.86	97.2	103.5	105.7	97.5	99.7	96.1	98.2	102.1
F1LP30	Mccc1	Methylcrotonoyl-CoA carboxylase subunit alpha, mitochondrial OS=Rattus norvegicus OX=10116 GN=Mccc1 PE=1 SV=1	38	19	34	19	715	79.2	7.14	96.19	103.7	105.1	103.7	102.8	99.6	95.1	94.6	95.4
P04903	Gsta2	Glutathione S-transferase alpha-2 OS=Rattus norvegicus OX=10116 GN=Gsta2 PE=1 SV=2	39	10	68	2	222	25.5	8.81	144.34	102.1	104.1	110.8	105.6	91.7	99.2	94.1	92.5
Q63530	Pter	Phosphotriesterase-related protein OS=Rattus norvegicus OX=10116 GN=Pter PE=2 SV=2	54	14	41	14	349	39.1	6.89	123.13	102.5	103.6	100.8	102.8	98.3	98.1	97.1	96.7
P07872	Acox1	Peroxisomal acyl-coenzyme A oxidase 1 OS=Rattus norvegicus OX=10116 GN=Acox1 PE=1 SV=1	34	17	33	17	661	74.6	8.47	84.32	104.6	101	101.9	103.5	97.3	97	98.1	96.6
D4AC23	Cct7	Chaperonin-containing TCP1 subunit 7 OS=Rattus norvegicus OX=10116 GN=Cct7 PE=1 SV=1	44	19	40	19	544	59.6	8	78.53	97.5	97.1	96.6	99.1	101.9	102.9	102.1	102.8
O35077	Gpd1	Glycerol-3-phosphate dehydrogenase [NAD(+)], cytoplasmic OS=Rattus norvegicus OX=10116 GN=Gpd1 PE=1 SV=4	57	18	42	16	349	37.4	6.6	104.21	103.1	100.5	101.3	101.1	98.6	97.2	98.8	99.3
F1MAN8	Lama5	Laminin subunit alpha 5 OS=Rattus norvegicus OX=10116 GN=Lama5 PE=1 SV=2	9	26	38	26	3713	403.5	6.68	69.81	95.3	95.8	101	96.2	106.2	103.2	101.5	100.9
A7VJC2	Hnrnpa2b1	Heterogeneous nuclear ribonucleoproteins A2/B1 OS=Rattus norvegicus OX=10116 GN=Hnrnpa2b1 PE=1 SV=1	35	14	47	10	353	37.5	8.95	101.31	106.8	86.3	89.9	88.8	105.8	106.5	108	107.9
Q68FY0	Uqcrc1	Cytochrome b-c1 complex subunit 1, mitochondrial OS=Rattus norvegicus OX=10116 GN=Uqcrc1 PE=1 SV=1	35	12	39	12	480	52.8	5.88	110.4	102.8	102.7	101.6	99.7	96.4	98.6	100.8	97.3
A2VCW9	Aass	Alpha-aminoadipic semialdehyde synthase, mitochondrial OS=Rattus norvegicus OX=10116 GN=Aass PE=2 SV=1	25	18	44	18	926	102.8	6.92	85.12	108.5	107.6	108.3	109.4	91.4	91.1	91.3	92.5
A0A0G2K695	Myof	Myoferlin OS=Rattus norvegicus OX=10116 GN=Myof PE=1 SV=1	19	34	40	33	2061	234.5	6.09	66.68	94.9	96	95.5	94.7	105.1	105.1	103.8	105
D3ZUX1	Hykk	Hydroxylysine kinase OS=Rattus norvegicus OX=10116 GN=Hykk PE=1 SV=1	39	14	49	14	376	42.4	5.64	103.14	105.9	105.2	105.1	103.9	94.6	94.9	95.1	95.4
P56571		ES1 protein homolog, mitochondrial OS=Rattus norvegicus OX=10116 PE=1 SV=2	52	10	36	10	266	28.2	8.92	96.79	101.9	100.8	100.5	102.3	98.1	97.9	98.9	99.6
P29410	Ak2	Adenylate kinase 2, mitochondrial OS=Rattus norvegicus OX=10116 GN=Ak2 PE=2 SV=2	51	11	47	11	239	26.4	6.79	96.84	104.8	103.8	104.2	103.1	97	93.9	95.9	97.4
A0A0G2JZ73	Serpina1	Alpha-1-antiproteinase OS=Rattus norvegicus OX=10116 GN=Serpina1 PE=1 SV=1	36	13	49	13	415	46.6	6.34	102.74	97.9	100.4	98.7	96.8	99.5	104.4	101.3	101
A0A0G2JSS8	Prdx5	Peroxiredoxin 5, isoform CRA_c OS=Rattus norvegicus OX=10116 GN=Prdx5 PE=1 SV=1	55	11	55	11	213	22.2	8.66	149.93	102.5	99.8	98.3	101.1	98	100.4	100	99.8
Q10758	Krt8	Keratin, type II cytoskeletal 8 OS=Rattus norvegicus OX=10116 GN=Krt8 PE=1 SV=3	49	22	43	18	483	54	6	101.55	93.3	91.2	95.9	92.9	108.9	105.9	106.2	105.9
A0A0G2JWI5	Glyat	Glycine N-acyltransferase OS=Rattus norvegicus OX=10116 GN=Glyat PE=1 SV=1	58	16	56	16	345	39.4	8.53	112.06	102.4	103.6	103.3	103.6	96.4	96.8	96.6	97.2
O35244	Prdx6	Peroxiredoxin-6 OS=Rattus norvegicus OX=10116 GN=Prdx6 PE=1 SV=3	65	14	43	14	224	24.8	5.94	88.75	97.3	96.7	100.2	101.8	101.7	102.4	101.4	98.5
F1MA36	Sptbn2	Spectrin beta chain OS=Rattus norvegicus OX=10116 GN=Sptbn2 PE=1 SV=2	13	26	40	17	2388	270.8	5.83	75.54	101.9	104.6	103.8	98.5	99.2	98.7	97.8	95.5
G3V6T1	Copa	Coatomer subunit alpha OS=Rattus norvegicus OX=10116 GN=Copa PE=1 SV=1	21	20	41	20	1224	138.3	7.65	85.58	97.6	99.4	103.6	97.5	102	100.2	99.7	100
P07335	Ckb	Creatine kinase B-type OS=Rattus norvegicus OX=10116 GN=Ckb PE=1 SV=2	52	13	48	13	381	42.7	5.67	107.3	92.5	92.7	94.8	92.8	107.8	106.4	107.3	105.6
A0A0G2K051	Eea1	Early endosome antigen 1 OS=Rattus norvegicus OX=10116 GN=Eea1 PE=1 SV=1	23	30	40	30	1449	165.3	5.72	79.9	106.3	100.6	100.6	98.9	99.2	97.3	98.9	98.1
A0A0G2K3C5	Cth	Cystathionine gamma-lyase OS=Rattus norvegicus OX=10116 GN=Cth PE=1 SV=1	64	18	58	18	398	43.6	7.8	139.98	105	105.9	106	106	93.8	93.6	95.1	94.7
P07314	Ggt1	Glutathione hydrolase 1 proenzyme OS=Rattus norvegicus OX=10116 GN=Ggt1 PE=1 SV=4	32	17	44	17	568	61.6	7.58	106.67	103.6	102.5	102.5	104.1	96.1	98.1	96.9	96.1
Q5XIN6	Letm1	Mitochondrial proton/calcium exchanger protein OS=Rattus norvegicus OX=10116 GN=Letm1 PE=1 SV=1	36	20	40	20	739	83	6.6	98.89	103	98.2	99.8	100.4	99.8	97.4	99.2	102.2
P36365	Fmo1	Dimethylaniline monooxygenase [N-oxide-forming] 1 OS=Rattus norvegicus OX=10116 GN=Fmo1 PE=1 SV=2	37	18	40	18	532	59.8	8.28	85.4	102	100.8	101	101.9	98.5	98	98.7	99.1
A0A0G2K047	Acss3	Acyl-CoA synthetase short-chain family member 3 OS=Rattus norvegicus OX=10116 GN=Acss3 PE=1 SV=1	34	21	37	21	683	74.6	8.63	81.5	103.7	102.6	103.7	104.2	98.8	95.3	96	95.7
A0A0G2K5P9	Pcca	Propionyl-CoA carboxylase alpha chain, mitochondrial OS=Rattus norvegicus OX=10116 GN=Pcca PE=1 SV=1	37	21	39	3	737	81.4	7.81	88.77	101.9	101.2	102.6	101.3	100.4	96.1	98.3	98.3
Q6P7A7	Rpn1	Dolichyl-diphosphooligosaccharide--protein glycosyltransferase subunit 1 OS=Rattus norvegicus OX=10116 GN=Rpn1 PE=1 SV=1	38	21	39	21	606	68.4	6.51	91.48	102.1	95.1	96.5	94.9	103.5	101.4	102.9	103.6
P25113	Pgam1	Phosphoglycerate mutase 1 OS=Rattus norvegicus OX=10116 GN=Pgam1 PE=1 SV=4	52	12	46	8	254	28.8	7.18	90.72	99.8	99.4	96.8	99.1	101.4	102.2	100.4	101.1
O35567	Atic	Bifunctional purine biosynthesis protein PURH OS=Rattus norvegicus OX=10116 GN=Atic PE=1 SV=2	34	15	37	15	592	64.2	7.14	92.82	101	100.1	100.4	98.6	100.3	99.6	99.6	100.4
P23514	Copb1	Coatomer subunit beta OS=Rattus norvegicus OX=10116 GN=Copb1 PE=1 SV=1	25	21	36	21	953	106.9	5.96	88.44	97.9	97	99.6	96.5	103.8	101.5	101.9	101.9
P13264	Gls	Glutaminase kidney isoform, mitochondrial OS=Rattus norvegicus OX=10116 GN=Gls PE=1 SV=2	35	16	39	16	674	74	7.87	91.51	98.9	98.1	100	98.2	102.1	101.5	100.4	100.8
F1LPV8	Suclg2	Succinate--CoA ligase [GDP-forming] subunit beta, mitochondrial OS=Rattus norvegicus OX=10116 GN=Suclg2 PE=1 SV=2	50	21	43	21	431	46.6	7.71	97.84	106.4	100.1	100.6	104.3	98.4	95.5	97.7	97
P14604	Echs1	Enoyl-CoA hydratase, mitochondrial OS=Rattus norvegicus OX=10116 GN=Echs1 PE=1 SV=1	43	11	50	11	290	31.5	8.13	116.53	104.3	103.5	104.2	104.8	96.1	95.3	95.7	96.1
P05708	Hk1	Hexokinase-1 OS=Rattus norvegicus OX=10116 GN=Hk1 PE=1 SV=4	25	23	38	21	918	102.3	6.71	86.03	98.5	95.9	97.6	98	101	102.9	102.6	103.5
P85968	Pgd	6-phosphogluconate dehydrogenase, decarboxylating OS=Rattus norvegicus OX=10116 GN=Pgd PE=1 SV=1	34	15	40	15	483	53.2	7.02	88.64	97.4	98.3	99.8	97.1	101.8	103	101	101.6
P62944	Ap2b1	AP-2 complex subunit beta OS=Rattus norvegicus OX=10116 GN=Ap2b1 PE=1 SV=1	29	20	32	10	937	104.5	5.38	88.73	99	103.4	103.9	93.5	102.5	96.7	100.2	100.9
Q6IRK9	Cpq	Carboxypeptidase Q OS=Rattus norvegicus OX=10116 GN=Cpq PE=1 SV=1	40	13	47	13	472	52	6.42	109.16	95.8	95.6	95.7	95.5	103.8	104.6	104.5	104.6
A0A0G2JUZ5	Gldc	Glycine cleavage system P protein OS=Rattus norvegicus OX=10116 GN=Gldc PE=1 SV=1	24	18	31	4	943	105.1	6.84	74.89	103.8	96	97.8	96.3	103.1	100.6	101.1	101.4
Q6IMX3	Acads	Acetyl-Coenzyme A dehydrogenase, short chain, isoform CRA_a OS=Rattus norvegicus OX=10116 GN=Acads PE=1 SV=1	48	14	39	14	414	44.9	8.28	102.38	98.4	98	97.6	99.4	100.5	103.5	102.4	100.3
F1M853	Rrbp1	Ribosome-binding protein 1 OS=Rattus norvegicus OX=10116 GN=Rrbp1 PE=1 SV=3	20	25	36	25	1453	157.4	9.07	61.78	93.5	95.5	98.6	95	104.1	104.2	104.8	104.2
P20817	Cyp4a14	Cytochrome P450 4A14 OS=Rattus norvegicus OX=10116 GN=Cyp4a14 PE=1 SV=2	31	15	56	2	507	58.2	9.09	130.11	101.8	99.5	101.3	109.1	93	91.8	105.7	97.8
Q5RKI0	Wdr1	WD repeat-containing protein 1 OS=Rattus norvegicus OX=10116 GN=Wdr1 PE=1 SV=3	32	16	39	16	606	66.1	6.62	89.65	94.9	97.7	98.1	96.3	102.2	105.8	102.7	102.3
D3ZUL3	Col6a1	Collagen type VI alpha 1 chain OS=Rattus norvegicus OX=10116 GN=Col6a1 PE=1 SV=1	21	15	29	15	1025	108.7	5.36	78.21	90.3	91.1	92.6	93.2	108.5	108.3	109.8	106.1
Q3MHS9	Cct6a	Chaperonin containing Tcp1, subunit 6A (Zeta 1) OS=Rattus norvegicus OX=10116 GN=Cct6a PE=1 SV=1	43	17	32	17	531	58	7.08	82.71	97.8	94.1	95.9	97.7	104.7	101.7	103.1	105.1
F1LQ55	Scp2	Non-specific lipid-transfer protein OS=Rattus norvegicus OX=10116 GN=Scp2 PE=1 SV=3	33	19	38	19	547	58.7	7.03	85.33	98.3	98.7	98.6	99.2	99.6	99.6	102.2	103.8
Q5XI34	Ppp2r1a	Protein phosphatase 2 (Formerly 2A), regulatory subunit A (PR 65), alpha isoform, isoform CRA_a OS=Rattus norvegicus OX=10116 GN=Ppp2r1a PE=1 SV=1	39	20	37	14	589	65.3	5.11	78.55	97	98.8	98.4	96.5	103.9	103.6	101.9	100
Q6JE36	Ndrg1	Protein NDRG1 OS=Rattus norvegicus OX=10116 GN=Ndrg1 PE=1 SV=1	44	10	31	10	394	42.9	6.19	64.68	98.5	99.4	97.6	99.1	102	101.2	102.8	99.4
Q63610	Tpm3	Tropomyosin alpha-3 chain OS=Rattus norvegicus OX=10116 GN=Tpm3 PE=1 SV=2	48	15	65	11	248	29	4.78	152.96	96	93	94.4	96.4	106.3	103.9	105.8	104.2
A0A0G2JVM0	Aldh4a1	Taste receptor type 1 member 2 OS=Rattus norvegicus OX=10116 GN=Aldh4a1 PE=1 SV=1	40	20	59	20	562	61.8	7.91	130.25	105.2	102	103.6	102.2	97.1	95.1	97.9	96.9
F1LM47	Sucla2	Succinate--CoA ligase [ADP-forming] subunit beta, mitochondrial OS=Rattus norvegicus OX=10116 GN=Sucla2 PE=1 SV=1	43	17	59	17	465	50.3	7.69	119.94	102.3	99.1	108.2	103.5	98.7	95.8	96.6	95.7
F1LZL1	LOC100910526	Sulfotransferase OS=Rattus norvegicus OX=10116 GN=LOC100910526 PE=1 SV=2	59	16	43	9	296	34.7	8.05	91.56	100.1	99.1	107	104.8	95.4	97.3	99.6	96.8
Q9EQS0	Taldo1	Transaldolase OS=Rattus norvegicus OX=10116 GN=Taldo1 PE=1 SV=2	39	15	49	15	337	37.4	7.03	94.61	94.7	94.6	94	95.6	104	105.6	106	105.5
P04904	Gsta3	Glutathione S-transferase alpha-3 OS=Rattus norvegicus OX=10116 GN=Gsta3 PE=1 SV=3	47	11	61	6	221	25.3	8.75	138.53	105.8	108.2	106.1	108.5	92.6	94.7	92.1	92
Q4AEF8	Copg1	Coatomer subunit gamma-1 OS=Rattus norvegicus OX=10116 GN=Copg1 PE=2 SV=1	29	20	36	18	874	97.6	5.39	76.01	97.7	100.2	99.7	99.4	101.2	99.8	100.7	101.4
A0A0G2K151	Apoe	Apolipoprotein E OS=Rattus norvegicus OX=10116 GN=Apoe PE=1 SV=1	43	17	40	17	359	41.2	5.83	80.11	106.9	105.1	106.3	105.5	95.1	93.4	93.3	94.4
Q68FP1	Gsn	Gelsolin OS=Rattus norvegicus OX=10116 GN=Gsn PE=1 SV=1	29	20	45	20	780	86	6.09	98.35	98.4	99.1	97.8	95.9	101.2	99.6	102.4	105.6
A0A0G2JZI2	Eprs	Glutamyl-prolyl-tRNA synthetase OS=Rattus norvegicus OX=10116 GN=Eprs PE=1 SV=1	20	26	37	26	1512	169.8	7.44	72.48	92.8	95.4	95.6	97	106	103.5	104.9	104.8
P19804	Nme2	Nucleoside diphosphate kinase B OS=Rattus norvegicus OX=10116 GN=Nme2 PE=1 SV=1	80	11	47	5	152	17.3	7.44	80.55	98	97.6	99.2	100.9	102	100.3	101.1	101
Q7TQ70	Fga	Ac1873 OS=Rattus norvegicus OX=10116 GN=Fga PE=1 SV=1	24	17	41	17	782	86.6	5.74	87.63	110.6	109.6	109	110.3	90.9	89.1	90.5	90
A0A0G2JV65	Ywhaz	14-3-3 protein zeta/delta OS=Rattus norvegicus OX=10116 GN=Ywhaz PE=1 SV=1	66	15	62	10	256	29	4.78	109.64	94	99.4	98.3	96.3	103	102.9	103.7	102.5
P85973	Pnp	Purine nucleoside phosphorylase OS=Rattus norvegicus OX=10116 GN=Pnp PE=1 SV=1	48	9	30	9	289	32.3	6.93	93.16	96.5	98.1	97.1	98.3	101.9	101.2	104.6	102.3
P14882	Pcca	Propionyl-CoA carboxylase alpha chain, mitochondrial OS=Rattus norvegicus OX=10116 GN=Pcca PE=1 SV=3	37	19	35	1	737	81.6	7.69	80.08	86.3	96.2	91.3	102.7	104.6	120.8	107.6	90.6
Q4V8H5	Dnpep	Aspartyl aminopeptidase OS=Rattus norvegicus OX=10116 GN=Dnpep PE=1 SV=1	34	14	43	14	475	52.5	7.25	92.8	97.9	96.2	109.9	97.2	99.3	101.7	99.5	98.4
D4ACB8	Cct8	Chaperonin subunit 8 (Theta) (Predicted), isoform CRA_a OS=Rattus norvegicus OX=10116 GN=Cct8 PE=1 SV=1	37	18	38	18	548	59.6	5.54	80.19	96.6	97.2	98.2	99.7	103	101.2	101.5	102.7
P14740	Dpp4	Dipeptidyl peptidase 4 OS=Rattus norvegicus OX=10116 GN=Dpp4 PE=1 SV=2	24	18	51	1	767	88	6.35	120.26	91	118.4	111.1	98.5	96.5	98.1	95.3	91.1
P12785	Fasn	Fatty acid synthase OS=Rattus norvegicus OX=10116 GN=Fasn PE=1 SV=3	14	26	35	26	2505	272.5	6.39	64.72	97.5	96	101.4	96.3	102.9	102.2	102	101.8
P05545	Serpina3k	Serine protease inhibitor A3K OS=Rattus norvegicus OX=10116 GN=Serpina3k PE=1 SV=3	30	11	32	1	416	46.5	5.44	65.89	97.4	97.7	99.6	99.4	104.2	104.4	100.7	96.5
P32551	Uqcrc2	Cytochrome b-c1 complex subunit 2, mitochondrial OS=Rattus norvegicus OX=10116 GN=Uqcrc2 PE=1 SV=2	34	15	48	15	452	48.4	9.14	122.96	102.8	102.6	101	101	98.3	99.1	97.9	97.2
Q6MG61	Clic1	Chloride intracellular channel protein 1 OS=Rattus norvegicus OX=10116 GN=Clic1 PE=1 SV=1	71	12	35	12	241	27	5.17	72.92	96.6	96.3	95.6	97.5	101.3	103.7	106.4	102.7
P07150	Anxa1	Annexin A1 OS=Rattus norvegicus OX=10116 GN=Anxa1 PE=1 SV=2	46	15	38	14	346	38.8	7.34	83.84	90.1	91.8	91.4	90.6	108.5	108.6	109.3	109.7
P62963	Pfn1	Profilin-1 OS=Rattus norvegicus OX=10116 GN=Pfn1 PE=1 SV=2	62	8	55	8	140	14.9	8.28	132.31	94	91.8	93	95	105.9	108	107.7	104.7
O88989	Mdh1	Malate dehydrogenase, cytoplasmic OS=Rattus norvegicus OX=10116 GN=Mdh1 PE=1 SV=3	45	14	62	14	334	36.5	6.58	137.52	99.1	97.5	96.7	100.5	101.1	101.4	102.2	101.5
G3V796	Acadm	Acetyl-Coenzyme A dehydrogenase, medium chain OS=Rattus norvegicus OX=10116 GN=Acadm PE=1 SV=1	37	15	43	15	421	46.5	8.41	115.56	102.7	101.4	102.4	103.9	97.9	95.9	97.3	98.6
P09495	Tpm4	Tropomyosin alpha-4 chain OS=Rattus norvegicus OX=10116 GN=Tpm4 PE=1 SV=3	45	15	57	8	248	28.5	4.69	130.19	92.1	91.9	92.2	94	108.1	107.2	107.6	106.9
Q68FT3	Pyroxd2	Pyridine nucleotide-disulfide oxidoreductase domain-containing protein 2 OS=Rattus norvegicus OX=10116 GN=Pyroxd2 PE=2 SV=1	31	15	35	15	581	62.8	8.18	83.7	98.6	98.1	102.4	98	100.7	100.7	101.3	100.2
Q5XIH3	Ndufv1	NADH dehydrogenase [ubiquinone] flavoprotein 1, mitochondrial OS=Rattus norvegicus OX=10116 GN=Ndufv1 PE=1 SV=1	45	15	37	15	464	50.7	8.07	83.21	100.7	103.7	102.1	100.7	97.7	99.7	97	98.2
Q68FR6	Eef1g	Elongation factor 1-gamma OS=Rattus norvegicus OX=10116 GN=Eef1g PE=2 SV=3	38	19	43	19	437	50	6.74	73.58	95	96.6	96.4	96.7	103.5	103.8	105.1	102.8
P02761		Major urinary protein OS=Rattus norvegicus OX=10116 PE=1 SV=1	48	11	106	4	181	20.7	6.21	267.24	100	102.2	101.5	101.2	95.5	100.9	98.4	100.3
Q68FZ8	Pccb	Propionyl coenzyme A carboxylase, beta polypeptide OS=Rattus norvegicus OX=10116 GN=Pccb PE=1 SV=1	44	17	36	17	541	58.6	7.84	81.4	108.4	111.3	118.8	96.8	92.6	92.5	89.6	90
D4A5Q9	Gldc	Glycine decarboxylase OS=Rattus norvegicus OX=10116 GN=Gldc PE=1 SV=1	21	16	29	2	884	98.5	6.64	59.66	94.4	88.7	90.3	110	110.2	101.1	105	100.3
P80299	Ephx2	Bifunctional epoxide hydrolase 2 OS=Rattus norvegicus OX=10116 GN=Ephx2 PE=1 SV=1	37	15	27	15	554	62.3	6.19	65.42	98.5	97.6	100.7	96.5	101.4	99.7	102.6	102.9
Q05962	Slc25a4	ADP/ATP translocase 1 OS=Rattus norvegicus OX=10116 GN=Slc25a4 PE=1 SV=3	52	15	52	4	298	33	9.79	105.32	100.1	103.5	110.8	105.8	95.6	91.8	99.9	92.4
P04642	Ldha	L-lactate dehydrogenase A chain OS=Rattus norvegicus OX=10116 GN=Ldha PE=1 SV=1	52	15	47	13	332	36.4	8.27	96.79	94.3	94.3	94.6	96.4	104.8	105.8	105.6	104.2
Q6P3V9	Rpl4	60S ribosomal protein L4 OS=Rattus norvegicus OX=10116 GN=Rpl4 PE=1 SV=1	38	14	39	14	421	47.3	11.02	88.95	95.7	96.6	96.4	95.6	103	103.4	103.7	105.5
Q9JKB7	Gda	Guanine deaminase OS=Rattus norvegicus OX=10116 GN=Gda PE=1 SV=1	37	14	32	14	454	50.9	5.72	73.36	94.7	94.5	94.4	92	106.3	109.2	104.8	104
P46413	Gss	Glutathione synthetase OS=Rattus norvegicus OX=10116 GN=Gss PE=1 SV=1	40	18	50	18	474	52.3	5.67	122.43	101.7	103.2	102.1	101.8	98.7	97.5	98.1	97
A0A0G2K9T4	Macf1	Microtubule-actin cross-linking factor 1 OS=Rattus norvegicus OX=10116 GN=Macf1 PE=1 SV=1	5	25	32	21	7384	834.6	5.38	53.76	100.7	96.3	99.4	96.2	103.3	103.9	100.7	99.7
A0A0G2JV31	Xpnpep1	X-prolyl aminopeptidase (Aminopeptidase P) 1, soluble, isoform CRA_a OS=Rattus norvegicus OX=10116 GN=Xpnpep1 PE=1 SV=1	34	20	36	20	666	74.6	5.9	71.15	99.8	98.9	98.2	98.9	101.1	101.5	101.7	100
P97536	Cand1	Cullin-associated NEDD8-dissociated protein 1 OS=Rattus norvegicus OX=10116 GN=Cand1 PE=1 SV=1	20	21	34	20	1230	136.3	5.78	77.02	98.8	95.8	98.6	98.6	103	101	101.4	102.7
A0A0H2UHE1	Suclg1	Succinate--CoA ligase [ADP/GDP-forming] subunit alpha, mitochondrial OS=Rattus norvegicus OX=10116 GN=Suclg1 PE=1 SV=1	28	9	36	9	360	37.5	9.48	96.03	104.7	101.6	102.3	104.7	96.4	96	97.9	96.4
P50554	Abat	4-aminobutyrate aminotransferase, mitochondrial OS=Rattus norvegicus OX=10116 GN=Abat PE=1 SV=3	42	14	31	14	500	56.4	7.93	68.42	101.9	100.9	102	101.9	100.1	97.1	97.6	98.3
A0A0G2K719	Ddx3x	DEAD-box helicase 3, X-linked OS=Rattus norvegicus OX=10116 GN=Ddx3x PE=1 SV=1	22	14	32	13	662	73.1	7.18	81.28	92	96.8	102.7	96.9	103	101.7	103.2	103.7
Q5XIT9	Mccc2	Methylcrotonoyl-CoA carboxylase beta chain, mitochondrial OS=Rattus norvegicus OX=10116 GN=Mccc2 PE=2 SV=1	33	14	29	14	563	61.5	8.31	83.91	101.9	104.7	103.5	100.7	98.1	96.5	97.3	97.4
O55171	Acot2	Acyl-coenzyme A thioesterase 2, mitochondrial OS=Rattus norvegicus OX=10116 GN=Acot2 PE=1 SV=1	34	14	32	5	453	49.7	7.83	81.09	101.2	106.6	106.1	106.9	95.3	91.3	95.7	96.9
D3ZZN3	Acss1	Acetyl-coenzyme A synthetase OS=Rattus norvegicus OX=10116 GN=Acss1 PE=3 SV=1	28	15	31	15	682	74.8	6.86	60.08	102	103	102.7	101.5	100.1	98.7	97	95
D3ZTX4	Mgam	Maltase-glucoamylase OS=Rattus norvegicus OX=10116 GN=Mgam PE=1 SV=3	12	18	31	18	1795	204.8	5.43	72.53	101.9	101.2	117.9	104.7	96.2	91.7	93.6	92.8
A0A0G2K014	Lcp1	Lymphocyte cytosolic protein 1 OS=Rattus norvegicus OX=10116 GN=Lcp1 PE=1 SV=1	37	19	34	17	645	71.9	5.34	68.58	95.4	95.8	97.4	93.7	106.2	102.7	105.9	102.9
P45592	Cfl1	Cofilin-1 OS=Rattus norvegicus OX=10116 GN=Cfl1 PE=1 SV=3	67	15	38	12	166	18.5	8.09	80.22	92	92.4	92	93.3	106.3	108.9	105.8	109.4
F1LNH3	Col6a2	Collagen type VI alpha 2 chain OS=Rattus norvegicus OX=10116 GN=Col6a2 PE=1 SV=2	21	15	36	15	1027	109.6	6.61	89.59	90.1	91.4	92	91.2	109.5	108.8	108.4	108.7
Q62669	LOC103694855	Globin a1 OS=Rattus norvegicus OX=10116 GN=LOC103694855 PE=1 SV=1	46	7	138	4	147	16	8.19	408.43	128.3	126.4	125.1	130.7	72.9	71.5	72.8	72.2
A0A0G2JT93	Ctnnb1	Catenin (Cadherin associated protein), beta 1, isoform CRA_a OS=Rattus norvegicus OX=10116 GN=Ctnnb1 PE=1 SV=1	32	21	31	15	781	85.4	5.86	69.8	97.3	96.4	96.5	94.7	104.2	103.4	102.3	105.2
D4A9D6	Dhx9	DEAH (Asp-Glu-Ala-His) box polypeptide 9 (Predicted) OS=Rattus norvegicus OX=10116 GN=Dhx9 PE=1 SV=1	20	18	28	18	1174	131.6	6.35	68.65	95	95.3	92.1	98.5	102.2	103.3	103.5	110.1
Q5XIH7	Phb2	Prohibitin-2 OS=Rattus norvegicus OX=10116 GN=Phb2 PE=1 SV=1	45	15	41	15	299	33.3	9.83	110.62	101.6	98.8	98.9	99.8	99.2	99.3	99.9	102.5
G3V827	Kyat1	Cysteine conjugate-beta lyase 1, isoform CRA_a OS=Rattus norvegicus OX=10116 GN=Kyat1 PE=1 SV=1	29	11	34	10	457	51.5	7.5	66.57	99.8	97.2	100.7	100.8	99.3	100.6	101.4	100.1
Q3MIE4	Vat1	Synaptic vesicle membrane protein VAT-1 homolog OS=Rattus norvegicus OX=10116 GN=Vat1 PE=1 SV=1	45	12	35	12	404	43.1	6.62	96.38	97.4	93.9	93.2	94.9	104.7	104.6	105	106.4
P11348	Qdpr	Dihydropteridine reductase OS=Rattus norvegicus OX=10116 GN=Qdpr PE=1 SV=1	57	10	30	10	241	25.5	7.81	65.5	100.8	101.5	101.5	103.8	98.7	97.7	98.5	97.5
Q6URK4	Hnrnpa3	Heterogeneous nuclear ribonucleoprotein A3 OS=Rattus norvegicus OX=10116 GN=Hnrnpa3 PE=1 SV=1	27	14	41	12	379	39.6	9.01	78.96	93.1	92.3	91.3	92	106.8	107.2	107.8	109.5
Q5PPG2	Lgmn	Legumain OS=Rattus norvegicus OX=10116 GN=Lgmn PE=1 SV=1	33	9	31	9	435	49.4	6.58	92.76	98.6	105.5	102.2	101.6	98.9	101.9	96.6	94.7
P02651	Apoa4	Apolipoprotein A-IV OS=Rattus norvegicus OX=10116 GN=Apoa4 PE=1 SV=2	51	20	32	20	391	44.4	5.22	71.5	90.3	90.3	93.6	95.3	109.9	109.8	106.3	104.4
A0A0G2K9E0	Rnh1	Ribonuclease inhibitor OS=Rattus norvegicus OX=10116 GN=Rnh1 PE=1 SV=1	44	15	29	15	492	54.1	4.98	76.55	98.4	96.8	98.2	94.7	104.3	101.4	103.3	103
F1LZW6	Slc25a13	Solute carrier family 25 member 13 OS=Rattus norvegicus OX=10116 GN=Slc25a13 PE=1 SV=2	37	18	30	14	484	54.1	7.25	76.91	101.3	102.3	107.6	104.8	96.4	95.6	96.4	95.4
P28480	Tcp1	T-complex protein 1 subunit alpha OS=Rattus norvegicus OX=10116 GN=Tcp1 PE=1 SV=1	31	13	29	13	556	60.3	6.21	71	96.3	96.4	98	99	103.3	102.7	102.8	101.4
G3V8A5	Vps35	Vacuolar protein sorting-associated protein 35 OS=Rattus norvegicus OX=10116 GN=Vps35 PE=1 SV=1	27	19	35	19	796	91.7	5.44	75.39	111.1	97.6	96.9	97.6	101.9	98.4	99	97.6
G3V9J1		Uncharacterized protein OS=Rattus norvegicus OX=10116 PE=1 SV=3	17	16	53	1	872	97.3	7.97	119	104.8	97.4	108.3	88.1	114.3	96.8	96.5	93.9
Q6P6U2	Psmc3	26S proteasome regulatory subunit 6A OS=Rattus norvegicus OX=10116 GN=Psmc3 PE=1 SV=1	45	16	32	16	442	49.5	5.19	64.76	94.4	99	94.8	97.7	102.3	101.6	103.8	106.4
F1M9V7	Npepps	Aminopeptidase OS=Rattus norvegicus OX=10116 GN=Npepps PE=1 SV=1	24	17	29	17	920	103.3	5.77	64.64	101.9	97	104.7	98.9	98.2	97.2	100.5	101.6
G3V734	Decr1	2,4-dienoyl CoA reductase 1, mitochondrial, isoform CRA_a OS=Rattus norvegicus OX=10116 GN=Decr1 PE=1 SV=1	40	12	31	12	335	36.1	8.94	80.26	103.5	101.5	103.1	105.7	96.9	94.5	99.2	95.6
Q4KLP0	Dhtkd1	Probable 2-oxoglutarate dehydrogenase E1 component DHKTD1, mitochondrial OS=Rattus norvegicus OX=10116 GN=Dhtkd1 PE=2 SV=1	20	12	33	12	920	102.6	7.03	60.01	100.4	101.2	100.1	103.9	97.6	99.8	98	99
F1LNF0	Myh14	Myosin heavy chain 14 OS=Rattus norvegicus OX=10116 GN=Myh14 PE=1 SV=1	9	15	41	8	2000	228.8	5.55	93.1	99.3	102.8	101.3	99.3	98.6	97.5	100.8	100.5
G3V6P2	Dlst	Dihydrolipoamide S-succinyltransferase (E2 component of 2-oxo-glutarate complex), isoform CRA_a OS=Rattus norvegicus OX=10116 GN=Dlst PE=1 SV=1	33	13	33	13	454	48.9	8.7	93.24	99	99.7	99.2	103.1	99.3	99.6	101.7	98.3
F1MAA7	Lamc1	Laminin subunit gamma 1 OS=Rattus norvegicus OX=10116 GN=Lamc1 PE=1 SV=1	14	19	41	19	1607	177.3	5.22	82.79	96.8	100.4	99.5	95.5	103.7	101.1	100.8	102.1
M0R6K0	Lamb2	Laminin subunit beta-2 OS=Rattus norvegicus OX=10116 GN=Lamb2 PE=1 SV=1	16	22	26	21	1801	196.4	6.8	60.52	93.8	98.2	98.5	97.5	102.1	101	103.5	105.5
P20673	Asl	Argininosuccinate lyase OS=Rattus norvegicus OX=10116 GN=Asl PE=2 SV=1	33	14	38	14	461	51.5	6.4	89.12	101.5	100.8	101.2	102.5	97.8	100.1	98.7	97.4
Q5RKL4	Dmgdh	Dimethylglycine dehydrogenase OS=Rattus norvegicus OX=10116 GN=Dmgdh PE=1 SV=1	23	15	24	15	857	95.9	7.24	70.12	102.3	102.3	104.8	103.3	98.5	97.3	95	96.5
Q561R9	Lactb2	Endoribonuclease LACTB2 OS=Rattus norvegicus OX=10116 GN=Lactb2 PE=2 SV=1	49	12	35	12	288	32.5	6.33	80.12	101.2	103.3	100.4	100.5	97.8	100.6	98.9	97.3
P14480	Fgb	Fibrinogen beta chain OS=Rattus norvegicus OX=10116 GN=Fgb PE=1 SV=4	35	15	39	15	479	54.2	7.78	75.96	107.2	109.8	104.7	110.1	91.5	91.8	91.9	92.9
Q3B8N9	Bphl	Biphenyl hydrolase-like OS=Rattus norvegicus OX=10116 GN=Bphl PE=1 SV=1	51	12	32	12	291	32.8	8.79	76.17	104.6	101.8	100.8	104.8	96.6	97.4	96.4	97.6
Q8CG45	Akr7a2	Aflatoxin B1 aldehyde reductase member 2 OS=Rattus norvegicus OX=10116 GN=Akr7a2 PE=1 SV=2	37	10	41	10	367	40.6	8.1	85.58	101.9	102.2	101.4	102	97.3	97.4	98	99.8
P24470	Cyp2c23	Cytochrome P450 2C23 OS=Rattus norvegicus OX=10116 GN=Cyp2c23 PE=2 SV=2	37	17	48	17	494	56.4	8.43	69.64	100.4	103.6	99.9	100.5	98.5	99.1	98.6	99.4
Q66X93	Snd1	Staphylococcal nuclease domain-containing protein 1 OS=Rattus norvegicus OX=10116 GN=Snd1 PE=1 SV=1	25	19	29	19	909	101.9	7.18	60.8	95.5	95.7	96.3	96.7	104.8	104.4	103.6	103
F1LRY5	Sardh	RCG45398 OS=Rattus norvegicus OX=10116 GN=Sardh PE=1 SV=2	23	18	33	18	919	101.4	6.62	66.86	101.8	104.5	103.3	102.9	98.1	96.1	96.9	96.5
Q66HF3	Etfdh	Electron transfer flavoprotein-ubiquinone oxidoreductase, mitochondrial OS=Rattus norvegicus OX=10116 GN=Etfdh PE=1 SV=1	37	19	33	19	616	68.1	7.56	81.74	101.5	101.9	101	103.7	100.9	95.3	96.7	99
Q7TQ94	Nit1	Deaminated glutathione amidase OS=Rattus norvegicus OX=10116 GN=Nit1 PE=2 SV=2	54	12	29	12	327	36.1	7.03	73.91	109.5	98.9	100.2	99.2	97.8	96.7	98.5	99.2
P04256	Hnrnpa1	Heterogeneous nuclear ribonucleoprotein A1 OS=Rattus norvegicus OX=10116 GN=Hnrnpa1 PE=1 SV=3	22	9	39	5	320	34.2	9.14	89.74	92.2	92	91.1	94.1	108.1	105.1	107.4	110
P62815	Atp6v1b2	V-type proton ATPase subunit B, brain isoform OS=Rattus norvegicus OX=10116 GN=Atp6v1b2 PE=1 SV=1	33	14	35	8	511	56.5	5.81	81.32	98.8	98.7	104.6	100.8	97.9	100	99.9	99.3
Q02874	H2afy	Core histone macro-H2A.1 OS=Rattus norvegicus OX=10116 GN=H2afy PE=1 SV=4	40	13	25	13	371	39.5	9.79	61.71	95.3	94.4	94.3	95.2	105.5	104.3	104.7	106.2
P14668	Anxa5	Annexin A5 OS=Rattus norvegicus OX=10116 GN=Anxa5 PE=1 SV=3	49	13	39	13	319	35.7	5.05	92.59	87.9	88.1	91.5	89.7	108.9	112.9	110.6	110.4
P27867	Sord	Sorbitol dehydrogenase OS=Rattus norvegicus OX=10116 GN=Sord PE=1 SV=4	54	16	35	16	357	38.2	7.44	77.03	99.4	100.2	99.8	103.6	99.2	100.1	99.7	98.2
P06866	Hp	Haptoglobin OS=Rattus norvegicus OX=10116 GN=Hp PE=1 SV=3	38	15	34	15	347	38.5	6.54	72.46	97.8	96.6	98.6	97.7	101.2	103.4	103.4	101.4
A0A0G2JZ52	Hnrnpu	Heterogeneous nuclear ribonucleoprotein U OS=Rattus norvegicus OX=10116 GN=Hnrnpu PE=1 SV=1	26	18	33	18	803	87.9	6.09	79.06	94	93.8	95	94.2	103.7	107.3	107.1	105
P07171	Calb1	Calbindin OS=Rattus norvegicus OX=10116 GN=Calb1 PE=1 SV=2	47	14	40	14	261	30	4.83	88.8	99.2	98.3	101.1	99.9	101.5	101.6	99.9	98.5
Q6PTT0	Acy1b	Aminoacylase-1B OS=Rattus norvegicus OX=10116 GN=Acy1b PE=1 SV=1	31	10	42	1	408	45.8	5.96	103.32	87	101.8	108.9	93.1	103.4	95.3	104.7	105.8
Q9JJ19	Slc9a3r1	Na(+)/H(+) exchange regulatory cofactor NHE-RF1 OS=Rattus norvegicus OX=10116 GN=Slc9a3r1 PE=1 SV=3	49	17	58	17	356	38.8	6	134.83	103.4	100.7	105.2	103.1	96.3	96.5	97.8	97.1
D3ZQN7	Lamb1	Laminin subunit beta 1 OS=Rattus norvegicus OX=10116 GN=Lamb1 PE=1 SV=3	17	21	30	20	1786	197.3	4.97	63.32	98.2	95.3	110	95	99	100.8	101.3	100.4
D3ZKG1	Mut	Methylmalonyl CoA mutase OS=Rattus norvegicus OX=10116 GN=Mut PE=1 SV=2	29	18	29	18	833	92	7.72	60.69	106.2	101.2	102.4	104.7	101.2	94.4	95.2	94.7
O08651	Phgdh	D-3-phosphoglycerate dehydrogenase OS=Rattus norvegicus OX=10116 GN=Phgdh PE=1 SV=3	40	16	30	16	533	56.5	6.71	80.85	100.2	99.8	99.1	98.7	100.2	101.4	100.1	100.6
A0A0G2JW90	Pdha1	Pyruvate dehydrogenase E1 component subunit alpha OS=Rattus norvegicus OX=10116 GN=Pdha1 PE=1 SV=1	42	14	32	14	390	43.2	8.19	92.12	103.7	103	102.1	101.7	97.6	95.7	97.8	98.4
A0A0G2JW12	LOC103689965	Complement C4-like OS=Rattus norvegicus OX=10116 GN=LOC103689965 PE=4 SV=1	16	21	26	8	1737	192.1	7.46	58.5	100	95.2	99.8	98.3	103.1	100.6	101.9	101.2
Q811X6	Cryl1	Lambda-crystallin homolog OS=Rattus norvegicus OX=10116 GN=Cryl1 PE=1 SV=3	47	12	38	12	319	35.3	6.35	87.5	101.6	100.9	100.2	98.7	99.1	101	99.1	99.4
Q9QZA2	Pdcd6ip	Programmed cell death 6-interacting protein OS=Rattus norvegicus OX=10116 GN=Pdcd6ip PE=1 SV=2	25	18	28	18	873	96.6	6.52	50.1	96.9	97.6	98.6	97.5	104.1	101.3	101.2	102.8
Q5XFX0	Tagln2	Transgelin-2 OS=Rattus norvegicus OX=10116 GN=Tagln2 PE=1 SV=1	63	12	44	12	199	22.4	8.25	89.05	93.4	90.8	91.2	91.9	108.9	109.4	108	106.4
P32755	Hpd	4-hydroxyphenylpyruvate dioxygenase OS=Rattus norvegicus OX=10116 GN=Hpd PE=1 SV=3	36	14	33	14	393	45.1	6.77	70.15	98.9	98.5	101	100.2	103.7	99.5	101.3	96.9
G3V712	Krt7	Keratin complex 2, basic, gene 7, isoform CRA_a OS=Rattus norvegicus OX=10116 GN=Krt7 PE=1 SV=1	33	16	36	11	457	50.8	5.87	76.65	86.3	88.5	92.5	93.7	111.7	110.5	110.3	106.5
P12007	Ivd	Isovaleryl-CoA dehydrogenase, mitochondrial OS=Rattus norvegicus OX=10116 GN=Ivd PE=1 SV=2	28	10	34	10	424	46.4	7.9	79.64	100.8	100.6	98.8	103.8	99.2	97.8	98.7	100.4
A0A0G2JSV5	Haao	3-hydroxyanthranilate 3,4-dioxygenase OS=Rattus norvegicus OX=10116 GN=Haao PE=1 SV=1	58	14	30	14	286	32.5	5.67	76.09	103	106.8	105.8	105.4	97.2	93.8	93.9	94.1
A0A0G2JWK7	Tagln	Transgelin OS=Rattus norvegicus OX=10116 GN=Tagln PE=1 SV=1	43	8	40	8	207	23.3	8.66	98.05	90.2	90.3	87.9	91.5	109.9	110.1	111	109.1
Q920A6	Scpep1	Retinoid-inducible serine carboxypeptidase OS=Rattus norvegicus OX=10116 GN=Scpep1 PE=2 SV=1	26	11	42	11	452	51.1	5.53	68.99	92.8	92.9	94.5	94	107.8	105.4	105.8	106.9
F1M3D3	Hnrnpm	Heterogeneous nuclear ribonucleoprotein M OS=Rattus norvegicus OX=10116 GN=Hnrnpm PE=1 SV=1	30	19	31	19	729	77.6	8.63	62.4	94.8	91	92.7	95.4	106.3	105.5	106.9	107.3
P29266	Hibadh	3-hydroxyisobutyrate dehydrogenase, mitochondrial OS=Rattus norvegicus OX=10116 GN=Hibadh PE=1 SV=3	32	8	36	8	335	35.3	8.47	83.01	113.3	100	99.3	99.9	97.5	95.8	98.4	95.9
P40329	Rars	Arginine--tRNA ligase, cytoplasmic OS=Rattus norvegicus OX=10116 GN=Rars PE=1 SV=2	24	17	30	17	660	75.8	7.05	57.97	99.2	97.1	99.5	97.9	102.6	100.7	101.2	101.8
P10111	Ppia	Peptidyl-prolyl cis-trans isomerase A OS=Rattus norvegicus OX=10116 GN=Ppia PE=1 SV=2	60	10	66	10	164	17.9	8.16	159.31	95.7	95.5	95.7	95.2	103.1	105.5	103.5	105.9
Q5RKI1	Eif4a2	Eukaryotic initiation factor 4A-II OS=Rattus norvegicus OX=10116 GN=Eif4a2 PE=1 SV=1	30	12	31	7	407	46.4	5.48	77.25	97.5	97.3	101.2	96	100.9	98.9	102	106.1
Q68FY4	Gc	Group specific component OS=Rattus norvegicus OX=10116 GN=Gc PE=1 SV=1	40	15	25	15	476	53.5	5.86	60.56	96.5	109.6	94	96.8	100.1	100	100.3	102.6
P62198	Psmc5	26S proteasome regulatory subunit 8 OS=Rattus norvegicus OX=10116 GN=Psmc5 PE=1 SV=1	39	15	27	14	406	45.6	7.55	51.53	98.5	95	101.1	98.4	103.2	101.4	102.2	100.2
G3V6C4	Ugdh	UDP-glucose 6-dehydrogenase OS=Rattus norvegicus OX=10116 GN=Ugdh PE=1 SV=1	38	15	28	15	493	54.9	7.34	67.44	104.9	101.2	103.3	101	99.4	99	96.4	94.8
P13221	Got1	Aspartate aminotransferase, cytoplasmic OS=Rattus norvegicus OX=10116 GN=Got1 PE=1 SV=3	37	12	39	12	413	46.4	7.21	103.81	100.3	100.9	101	100.9	99.5	99.9	99.5	97.9
O35078	Dao	D-amino-acid oxidase OS=Rattus norvegicus OX=10116 GN=Dao PE=2 SV=1	38	11	46	11	346	38.8	7.18	100.35	97.7	101.4	99.2	98.9	99.2	102.9	101.4	99.4
Q66HA8	Hsph1	Heat shock protein 105 kDa OS=Rattus norvegicus OX=10116 GN=Hsph1 PE=1 SV=1	26	18	31	16	858	96.4	5.55	58.85	101.3	98.7	100.6	98.5	103.2	98.2	101.4	98.1
D3ZCI0	Gk	Glycerol kinase OS=Rattus norvegicus OX=10116 GN=Gk PE=1 SV=2	37	17	31	17	524	57.4	5.66	69.4	104.6	97.2	97.7	100.1	100.1	99	100.8	100.5
Q9Z2M4	Decr2	Peroxisomal 2,4-dienoyl-CoA reductase OS=Rattus norvegicus OX=10116 GN=Decr2 PE=2 SV=1	41	11	25	11	292	31.3	8.25	64.09	94.7	97.1	99.8	96.5	103.4	102.9	104.8	100.8
Q07936	Anxa2	Annexin A2 OS=Rattus norvegicus OX=10116 GN=Anxa2 PE=1 SV=2	36	13	46	13	339	38.7	7.69	114.04	89.6	88.4	88.4	90.2	110.3	110.6	110.8	111.6
P70473	Amacr	Alpha-methylacyl-CoA racemase OS=Rattus norvegicus OX=10116 GN=Amacr PE=1 SV=3	43	12	28	2	382	41.8	6.84	67.64	105.8	110	107.9	106.8	93.2	91.5	92.5	92.3
F1LRI5	Gcn1l1	GCN1 eIF2 alpha kinase activator-like 1 OS=Rattus norvegicus OX=10116 GN=Gcn1l1 PE=1 SV=3	11	21	27	21	2671	292.9	7.3	42.9	98.7	99.1	102.4	97.2	104.5	102	98	98
Q6P3V8	Eif4a1	Eukaryotic translation initiation factor 4A1 OS=Rattus norvegicus OX=10116 GN=Eif4a1 PE=1 SV=1	35	13	34	8	406	46.1	5.48	75.52	98.1	96.4	97.5	96.3	102.6	102	102.6	104.4
A0A0G2JVG4	Pecr	Peroxisomal trans-2-enoyl-CoA reductase OS=Rattus norvegicus OX=10116 GN=Pecr PE=1 SV=1	44	8	33	8	305	32.7	8.59	92.11	98.6	102.1	101	101	98.9	101.6	98.5	98.3
A0A0G2K235	Rab1a	RAB1A, member RAS oncogene family OS=Rattus norvegicus OX=10116 GN=Rab1a PE=1 SV=1	38	11	37	6	323	36.4	9.89	82.42	105.8	98.5	95.4	97.8	100.2	99.6	101.3	101.3
P67779	Phb	Prohibitin OS=Rattus norvegicus OX=10116 GN=Phb PE=1 SV=1	68	15	35	15	272	29.8	5.76	79.21	98.7	100.1	101	98.8	99.8	100.6	100	101
P14173	Ddc	Aromatic-L-amino-acid decarboxylase OS=Rattus norvegicus OX=10116 GN=Ddc PE=1 SV=1	25	11	23	11	480	54	6.96	61.9	101.2	101.5	101	105.7	100.2	94.4	99.8	96.3
B0BN46	Grhpr	Glyoxylate and hydroxypyruvate reductase OS=Rattus norvegicus OX=10116 GN=Grhpr PE=1 SV=1	39	12	28	12	335	35.9	7.93	66.9	101.4	101.6	105.2	100.2	100.7	96.2	97.4	97.3
P50123	Enpep	Glutamyl aminopeptidase OS=Rattus norvegicus OX=10116 GN=Enpep PE=1 SV=2	18	16	36	16	945	107.9	5.39	81.93	100.7	105.3	101.7	105	95.7	93.6	99.3	98.7
P32198	Cpt1a	Carnitine O-palmitoyltransferase 1, liver isoform OS=Rattus norvegicus OX=10116 GN=Cpt1a PE=1 SV=2	23	14	25	13	773	88.1	8.54	41.27	103.6	105.5	104.4	104.4	95.6	94.9	95.8	95.8
Q68G41	Eci1	Dodecenoyl-Coenzyme A delta isomerase (3,2 trans-enoyl-Coenzyme A isomerase) OS=Rattus norvegicus OX=10116 GN=Eci1 PE=1 SV=1	36	11	40	1	289	32.2	9.54	111.07	109.5	110.3	104.6	107.5	91.6	89.4	91.8	95.3
P23965	Eci1	Enoyl-CoA delta isomerase 1, mitochondrial OS=Rattus norvegicus OX=10116 GN=Eci1 PE=1 SV=1	36	11	39	1	289	32.2	9.54	111.35	106.6	105.9	107.9	107.3	93.2	92.8	93.7	92.6
Q5BK63	Ndufa9	NADH dehydrogenase [ubiquinone] 1 alpha subcomplex subunit 9, mitochondrial OS=Rattus norvegicus OX=10116 GN=Ndufa9 PE=1 SV=2	37	14	29	14	377	42.5	9.82	68.53	99.4	101.8	101.2	99.9	95.5	95.6	96	110.7
P52759	Rida	2-iminobutanoate/2-iminopropanoate deaminase OS=Rattus norvegicus OX=10116 GN=Rida PE=1 SV=3	83	9	45	9	137	14.3	8.1	110.75	103.7	106	100.2	106.2	95.2	95	95.5	98.2
Q5XIJ3	Idh3g	Isocitrate dehydrogenase [NAD] subunit, mitochondrial OS=Rattus norvegicus OX=10116 GN=Idh3g PE=1 SV=1	36	11	30	10	393	42.8	9.01	60.73	103.3	105.1	102.1	102	96.5	100.4	95.8	94.7
Q3KRF2	Hdlbp	High density lipoprotein binding protein (Vigilin) OS=Rattus norvegicus OX=10116 GN=Hdlbp PE=1 SV=1	19	20	28	20	1268	141.6	6.95	60.46	95	93	93.5	99.1	107.1	102.1	104.3	105.8
Q920P0	Dcxr	L-xylulose reductase OS=Rattus norvegicus OX=10116 GN=Dcxr PE=1 SV=1	52	10	29	10	244	25.7	7.31	76.78	100.5	102.4	104.5	98.8	99	97.2	98.2	99.5
Q4V8F9	Hsdl2	Hydroxysteroid dehydrogenase-like protein 2 OS=Rattus norvegicus OX=10116 GN=Hsdl2 PE=2 SV=1	38	15	27	15	524	58.3	6.19	61.06	102	99.4	103.9	105.1	99.7	96.6	97.4	95.8
D3Z9E1	Emilin1	Elastin microfibril interfacer 1 OS=Rattus norvegicus OX=10116 GN=Emilin1 PE=1 SV=1	28	20	28	20	900	94.4	4.98	54.43	89.1	91.9	98.7	87.8	110	104.8	107.5	110.3
Q62651	Ech1	Delta(3,5)-Delta(2,4)-dienoyl-CoA isomerase, mitochondrial OS=Rattus norvegicus OX=10116 GN=Ech1 PE=1 SV=2	67	15	27	15	327	36.1	7.99	60.35	106	102.8	100	103.9	96.5	97.2	95.6	97.9
A0A0G2K9H8	Arf3	FK506 binding protein 11 OS=Rattus norvegicus OX=10116 GN=Arf3 PE=3 SV=1	45	9	35	1	187	21.1	7.37	87.54	97.2	96.7	93.9	98.7	100.5	103.8	103.4	105.7
Q7TP08	Amacr	Alpha-methylacyl-CoA racemase OS=Rattus norvegicus OX=10116 GN=Amacr PE=1 SV=1	34	11	27	1	454	49.9	6.6	63.09	141.6	127.5	142.6	136.7	66.3	57.8	63.4	64
D4A4Z9	Ktn1	Kinectin 1 OS=Rattus norvegicus OX=10116 GN=Ktn1 PE=1 SV=2	19	20	23	19	1325	151.7	6.01	49.16	101.7	99.2	101.6	95	102.1	98.9	100.1	101.4
P41542	Uso1	General vesicular transport factor p115 OS=Rattus norvegicus OX=10116 GN=Uso1 PE=1 SV=1	20	17	23	17	959	107.1	4.96	53.83	99.6	101.9	100.9	97.1	100.4	101.7	99.7	98.9
Q6PCU0	Atp5f1c	ATP synthase subunit gamma OS=Rattus norvegicus OX=10116 GN=Atp5f1c PE=1 SV=1	36	11	46	11	298	33	9.01	90.34	103.3	102.3	100.2	102.4	98.5	96.5	98.1	98.7
P62260	Ywhae	14-3-3 protein epsilon OS=Rattus norvegicus OX=10116 GN=Ywhae PE=1 SV=1	45	11	43	8	255	29.2	4.74	112.87	96.3	98.1	95	99.9	101.6	103.6	102.9	102.5
Q497B0	Nit2	Omega-amidase NIT2 OS=Rattus norvegicus OX=10116 GN=Nit2 PE=1 SV=1	58	14	36	14	276	30.7	7.3	81.83	102.9	104.7	99.3	103.7	97.5	97.4	97.8	96.8
P48508	Gclm	Glutamate--cysteine ligase regulatory subunit OS=Rattus norvegicus OX=10116 GN=Gclm PE=1 SV=1	38	8	43	8	274	30.5	5.52	84.29	105.1	105.1	104.9	108.5	94	93.6	94.1	94.7
P07632	Sod1	Superoxide dismutase [Cu-Zn] OS=Rattus norvegicus OX=10116 GN=Sod1 PE=1 SV=2	59	8	57	8	154	15.9	6.35	147.32	100.6	100.9	99.6	103.9	98	97.1	99.9	99.9
F1LNF7	Idh3a	Isocitrate dehydrogenase [NAD] subunit, mitochondrial OS=Rattus norvegicus OX=10116 GN=Idh3a PE=1 SV=2	45	16	39	16	382	41.2	6.93	62.09	107.1	101.5	98	100.7	98.2	99.2	97.9	97.3
Q6AYI1	Ddx5	DEAD (Asp-Glu-Ala-Asp) box polypeptide 5 OS=Rattus norvegicus OX=10116 GN=Ddx5 PE=1 SV=1	28	15	36	10	615	69.2	8.92	60.94	92.6	92.5	97	96.8	105.5	104.9	104.3	106.4
F2Z3Q8	Kpnb1	Importin subunit beta-1 OS=Rattus norvegicus OX=10116 GN=Kpnb1 PE=1 SV=1	20	13	23	13	876	97.1	4.78	49.19	97.7	95.2	95.9	95	104.2	104.6	104.5	102.9
A0A0G2K654	Hist1h1c	Histone cluster 1 H1 family member c OS=Rattus norvegicus OX=10116 GN=Hist1h1c PE=1 SV=1	42	13	53	3	212	21.3	11	119.3	91.3	92.5	87.5	92.2	107	109.2	110	110.3
O88267	Acot1	Acyl-coenzyme A thioesterase 1 OS=Rattus norvegicus OX=10116 GN=Acot1 PE=1 SV=1	34	13	26	5	419	46	6.8	68	112.3	99.4	96.9	104.3	98.2	93.6	98.4	96.9
Q5XHZ0	Trap1	Heat shock protein 75 kDa, mitochondrial OS=Rattus norvegicus OX=10116 GN=Trap1 PE=1 SV=1	26	16	28	15	706	80.4	7.03	79.4	98	98	99.7	97.4	100	104.4	100.8	101.7
A0A0H2UHQ0	Slc3a2	4F2 cell-surface antigen heavy chain OS=Rattus norvegicus OX=10116 GN=Slc3a2 PE=1 SV=1	25	11	23	11	566	61.8	5.19	69.15	100.9	98.6	99.3	101.9	99.9	97.9	101.3	100.3
F8WFI2	Acmsd	2-amino-3-carboxymuconate-6-semialdehyde decarboxylase OS=Rattus norvegicus OX=10116 GN=Acmsd PE=1 SV=3	42	11	25	11	336	37.8	5.88	61.09	99.8	98.4	100.4	101.3	100.6	98.8	99.5	101.1
Q91ZW6	Tmlhe	Trimethyllysine dioxygenase, mitochondrial OS=Rattus norvegicus OX=10116 GN=Tmlhe PE=1 SV=2	41	15	34	15	421	49.5	8.41	68.27	98	98.4	99.8	100.6	100.2	102.9	100.7	99.5
Q03336	Rgn	Regucalcin OS=Rattus norvegicus OX=10116 GN=Rgn PE=1 SV=3	52	13	27	13	299	33.4	5.47	45.89	107.7	111	108.8	108	91.6	90.9	91	91
F1LN42	Tns1	Tensin 1 OS=Rattus norvegicus OX=10116 GN=Tns1 PE=1 SV=2	12	16	26	14	1909	203.8	7.77	48.63	95.3	96.6	99.2	97.9	105.3	102.6	103.1	100.1
P08932		T-kininogen 2 OS=Rattus norvegicus OX=10116 PE=1 SV=2	41	14	30	5	430	47.7	6.35	74.1	108.9	113.6	107	110.8	91.5	93.6	87.4	87.1
Q60587	Hadhb	Trifunctional enzyme subunit beta, mitochondrial OS=Rattus norvegicus OX=10116 GN=Hadhb PE=1 SV=1	31	13	25	12	475	51.4	9.47	59.06	104.3	104.6	103.7	103.4	93.9	99.5	97	93.6
Q7M0E3	Dstn	Destrin OS=Rattus norvegicus OX=10116 GN=Dstn PE=1 SV=3	60	10	27	9	165	18.5	8.03	50.14	96.4	95.3	97	97.5	103.3	101.8	107.9	100.8
D3Z8F1	Vill	Villin-like OS=Rattus norvegicus OX=10116 GN=Vill PE=1 SV=2	22	16	24	16	857	96.3	6.93	57.64	103.4	100.8	102.5	101.4	98.6	97.5	97.4	98.6
Q62636	Rap1b	Ras-related protein Rap-1b OS=Rattus norvegicus OX=10116 GN=Rap1b PE=1 SV=2	55	9	19	5	184	20.8	5.78	51.25	90	91.3	124.1	99	95.3	100	102.2	98
Q923Z2	Tpm1	Tropomyosin 1, alpha, isoform CRA_a OS=Rattus norvegicus OX=10116 GN=Tpm1 PE=1 SV=1	42	14	45	7	284	32.8	4.75	79.77	93.2	93.3	96.2	96.4	107.5	105	104.2	104.3
B0BNJ4	Ethe1	ETHE1, persulfide dioxygenase OS=Rattus norvegicus OX=10116 GN=Ethe1 PE=1 SV=1	51	8	27	8	254	27.7	7.06	78.38	102.4	105.3	103.5	102.6	95.9	98.2	95	97.2
G3V6Y6	Pygb	Alpha-1,4 glucan phosphorylase OS=Rattus norvegicus OX=10116 GN=Pygb PE=1 SV=2	21	14	21	12	846	96.7	6.9	51.92	102.4	94.8	94.7	96.2	100.4	104.4	103.1	103.9
Q5VLR5	Erp44	BWK4 OS=Rattus norvegicus OX=10116 GN=Erp44 PE=1 SV=1	27	9	23	9	406	46.8	5.27	47.39	98.3	97.7	100.1	97.7	99.7	104	103.1	99.4
G3V7L8	Atp6v1e1	ATPase, H+ transporting, V1 subunit E isoform 1, isoform CRA_a OS=Rattus norvegicus OX=10116 GN=Atp6v1e1 PE=1 SV=1	42	13	37	13	226	26.1	8.43	69.85	101.4	104.7	105.9	101.8	97.7	94.9	97.7	95.9
Q9WVJ6	Tgm2	Tissue-type transglutaminase OS=Rattus norvegicus OX=10116 GN=Tgm2 PE=1 SV=1	23	14	30	14	686	76.9	5.1	56.63	89.4	91.6	92.7	91.5	110.5	108	109.2	107.2
B0BMS8	Myl9	Myl9 protein OS=Rattus norvegicus OX=10116 GN=Myl9 PE=1 SV=1	50	6	30	1	172	19.8	4.92	74.11	101.8	97.1	102.7	92.9	98.4	97.6	107.5	102
D3ZPL5		Uncharacterized protein OS=Rattus norvegicus OX=10116 PE=4 SV=2	36	12	29	12	270	30.5	10.61	74.65	98.3	95.8	95.7	96.1	101.1	102.5	105	105.4
P15865	Hist1h1e	Histone H1.4 OS=Rattus norvegicus OX=10116 GN=Hist1h1e PE=1 SV=3	41	12	55	2	219	22	11.11	122.36	87.7	87.7	85.7	89.1	109.3	109.7	115.9	114.9
P20788	Uqcrfs1	Cytochrome b-c1 complex subunit Rieske, mitochondrial OS=Rattus norvegicus OX=10116 GN=Uqcrfs1 PE=1 SV=2	47	9	29	9	274	29.4	8.87	84.5	100.3	101.5	104.3	101.1	97.5	96.8	98.8	99.6
B2RYW9	Fahd2	Fumarylacetoacetate hydrolase domain-containing protein 2 OS=Rattus norvegicus OX=10116 GN=Fahd2 PE=1 SV=1	42	10	26	10	313	34.6	8.35	66.55	100	100.7	103.4	101.4	100.6	98.2	99	96.8
Q05982	Nme1	Nucleoside diphosphate kinase A OS=Rattus norvegicus OX=10116 GN=Nme1 PE=1 SV=1	59	8	34	2	152	17.2	6.33	66.41	99.9	98.1	98.9	97.8	98.6	103.5	102.9	100.4
Q5U362	Anxa4	Annexin OS=Rattus norvegicus OX=10116 GN=Anxa4 PE=1 SV=1	42	12	21	12	319	35.9	5.57	63.09	90.8	87.6	91.9	93.2	108.8	108.4	110.5	108.8
Q5EBC0	Itih4	Inter alpha-trypsin inhibitor, heavy chain 4 OS=Rattus norvegicus OX=10116 GN=Itih4 PE=1 SV=1	27	21	32	21	933	103.7	6.2	60.29	104.1	102.1	104.1	103.7	97.5	96	94.9	97.6
M0R7B4	Hist1h1d	Histone cluster 1 H1 family member d OS=Rattus norvegicus OX=10116 GN=Hist1h1d PE=1 SV=2	45	14	51	7	220	22.2	11.11	114.12	92.7	90.7	89.3	93.5	106.5	107.4	109	111
P13832	Rlc-a	Myosin regulatory light chain RLC-A OS=Rattus norvegicus OX=10116 GN=Rlc-a PE=2 SV=2	62	8	32	2	172	19.9	4.81	72.98	100.4	94.2	99.1	89.4	106.6	104.4	105.5	100.3
D4A830	Ppa2	Pyrophosphatase (inorganic) 2 OS=Rattus norvegicus OX=10116 GN=Ppa2 PE=1 SV=2	38	10	24	10	304	35	6.52	56.83	101	99.9	103.5	101.9	98.6	101.2	96.5	97.4
B2GV15	Dbt	Dihydrolipoamide acetyltransferase component of pyruvate dehydrogenase complex OS=Rattus norvegicus OX=10116 GN=Dbt PE=1 SV=1	30	14	30	14	482	53.2	8.41	60.6	101.2	99.3	100.1	100.9	99.8	102.2	99.3	97.4
A0A0G2K7F7	Tpm1	Tropomyosin alpha-1 chain OS=Rattus norvegicus OX=10116 GN=Tpm1 PE=1 SV=1	34	13	46	1	303	34.6	4.81	79.27	89.7	94.3	98.2	97.6	101.9	104.6	103.9	109.9
G3V7T5	Xylb	Xylulokinase homolog (H. influenzae) OS=Rattus norvegicus OX=10116 GN=Xylb PE=1 SV=3	24	11	27	11	551	59.5	6.7	51.07	101.7	100.8	102.2	101	98.4	100.9	98.8	96.1
P04639	Apoa1	Apolipoprotein A-I OS=Rattus norvegicus OX=10116 GN=Apoa1 PE=1 SV=2	46	11	26	11	259	30	5.74	47.65	98	100.3	99	101.9	98.9	99.1	99.7	103.2
G3V6H5	Slc25a11	Mitochondrial 2-oxoglutarate/malate carrier protein OS=Rattus norvegicus OX=10116 GN=Slc25a11 PE=1 SV=1	43	10	28	10	314	34.1	9.96	74.1	99.2	96	101.8	103.9	98.4	98.3	100.4	102
A0A0G2JSZ5	Pdia6	Protein disulfide-isomerase A6 OS=Rattus norvegicus OX=10116 GN=Pdia6 PE=1 SV=1	31	10	23	10	445	48.7	5.19	65.04	94.7	91.5	97.8	94.7	103.2	106.7	105	106.3
P00787	Ctsb	Cathepsin B OS=Rattus norvegicus OX=10116 GN=Ctsb PE=1 SV=2	29	6	19	6	339	37.4	5.6	60.94	97.4	109.7	104.4	97.6	98	95.7	97.1	100.1
P54311	Gnb1	Guanine nucleotide-binding protein G(I)/G(S)/G(T) subunit beta-1 OS=Rattus norvegicus OX=10116 GN=Gnb1 PE=1 SV=4	40	11	25	6	340	37.4	6	66.11	97.1	98.5	96.6	100.3	101.1	103.1	99.6	103.7
P24329	Tst	Thiosulfate sulfurtransferase OS=Rattus norvegicus OX=10116 GN=Tst PE=1 SV=3	36	10	38	10	297	33.4	7.85	83.73	99.5	99.9	102.5	101	99.1	99.5	99.6	98.7
P07943	Akr1b1	Aldose reductase OS=Rattus norvegicus OX=10116 GN=Akr1b1 PE=1 SV=3	39	14	35	11	316	35.8	6.71	57.81	95.3	96.3	94.8	96.5	103.2	105.4	104.5	104.2
Q641Y8	Ddx1	ATP-dependent RNA helicase DDX1 OS=Rattus norvegicus OX=10116 GN=Ddx1 PE=1 SV=1	28	17	24	17	740	82.4	7.23	45.68	98.4	101.1	100.5	98.3	102.9	101.8	99.9	97.1
Q5M876	Acy3	N-acyl-aromatic-L-amino acid amidohydrolase (carboxylate-forming) OS=Rattus norvegicus OX=10116 GN=Acy3 PE=1 SV=1	40	9	30	9	319	35.4	5.64	81.61	106.1	108.7	107.4	105.3	93.3	95.9	93.3	90.1
Q5D059	Hnrnpk	Heterogeneous nuclear ribonucleoprotein K OS=Rattus norvegicus OX=10116 GN=Hnrnpk PE=1 SV=1	31	13	30	13	464	51	5.33	70.67	94	91.9	90.7	93.5	106.7	106.6	108.8	107.7
A0A0G2JSW0	Myl12b	Myosin regulatory light chain 12B OS=Rattus norvegicus OX=10116 GN=Myl12b PE=4 SV=1	62	8	31	1	172	19.8	4.84	67.8	93.1	94.5	94.9	95.8	104	108.2	105.2	104.2
P61589	Rhoa	Transforming protein RhoA OS=Rattus norvegicus OX=10116 GN=Rhoa PE=1 SV=1	44	10	26	8	193	21.8	6.1	53.12	94.8	93.4	97	98.7	103.8	103.7	104.3	104.2
P50398	Gdi1	Rab GDP dissociation inhibitor alpha OS=Rattus norvegicus OX=10116 GN=Gdi1 PE=1 SV=1	27	10	27	6	447	50.5	5.14	56.08	96.7	100.9	101.3	98	99.1	100.9	99.8	103.3
G3V6H0	LOC100363782	RCG48149, isoform CRA_b OS=Rattus norvegicus OX=10116 GN=LOC100363782 PE=1 SV=1	54	11	33	6	201	22.2	5.73	70.79	94.9	108.7	110.1	95.6	97.1	96.8	98.1	98.7
P97532	Mpst	3-mercaptopyruvate sulfurtransferase OS=Rattus norvegicus OX=10116 GN=Mpst PE=1 SV=3	42	9	30	9	297	32.9	6.32	79.51	99.8	99.3	105.2	101.5	96	98.5	98.2	101.6
D3ZAN3	Ganab	Alpha glucosidase 2 alpha neutral subunit (Predicted) OS=Rattus norvegicus OX=10116 GN=Ganab PE=1 SV=1	22	14	26	14	797	90.5	6.2	42.18	99	94.2	98.9	97.2	102.3	102.5	103.2	102.6
P47942	Dpysl2	Dihydropyrimidinase-related protein 2 OS=Rattus norvegicus OX=10116 GN=Dpysl2 PE=1 SV=1	27	11	24	9	572	62.2	6.38	63.42	95.2	91.4	98.2	96.2	105.2	103.4	104.1	106.3
P19945	Rplp0	60S acidic ribosomal protein P0 OS=Rattus norvegicus OX=10116 GN=Rplp0 PE=1 SV=2	46	11	21	11	317	34.2	6.25	47.29	97.7	91.3	98.7	100.2	115.1	97.9	100.8	98.3
P09527	Rab7a	Ras-related protein Rab-7a OS=Rattus norvegicus OX=10116 GN=Rab7a PE=1 SV=2	46	8	27	8	207	23.5	6.7	65.64	97.1	96.5	99.3	99.8	101.7	102.6	103.3	99.7
A0A0G2K9B1	LOC299282	Serine protease inhibitor A3N OS=Rattus norvegicus OX=10116 GN=LOC299282 PE=1 SV=1	38	13	26	8	432	48.3	5.57	64.27	100.8	100.8	105.7	99.9	98.3	101.8	96.8	96
G3V6T7	Pdia4	Protein disulfide-isomerase A4 OS=Rattus norvegicus OX=10116 GN=Pdia4 PE=1 SV=1	25	14	27	14	643	72.7	5.15	56.22	93	95.3	95.8	94.1	105.3	106.4	104.8	105.3
P25304	Agrn	Agrin OS=Rattus norvegicus OX=10116 GN=Agrn PE=1 SV=2	11	16	21	16	1959	208.5	6.15	45.19	98.9	99.6	98.1	93.8	102.1	101.3	102.7	103.5
Q68FX0	Idh3B	Isocitrate dehydrogenase [NAD] subunit beta, mitochondrial OS=Rattus norvegicus OX=10116 GN=Idh3B PE=2 SV=1	31	10	29	9	385	42.3	8.75	55.99	98.8	100.3	102.8	104	100.1	98	98.3	97.8
P58775	Tpm2	Tropomyosin beta chain OS=Rattus norvegicus OX=10116 GN=Tpm2 PE=1 SV=1	30	11	42	1	284	32.8	4.7	77.35	91	92.6	89.4	99.6	106	109.1	105	107.2
Q9WVK7	Hadh	Hydroxyacyl-coenzyme A dehydrogenase, mitochondrial OS=Rattus norvegicus OX=10116 GN=Hadh PE=2 SV=1	49	13	31	13	314	34.4	8.76	59.3	101.1	101.8	102.5	109.2	102.8	93.3	96.4	93
Q02974	Khk	Ketohexokinase OS=Rattus norvegicus OX=10116 GN=Khk PE=1 SV=1	49	12	29	12	298	32.7	6.67	63.29	102.9	103	104	104.5	96.9	96.6	95.6	96.5
A0A0H2UHB7	Slc4a4	Anion exchange protein OS=Rattus norvegicus OX=10116 GN=Slc4a4 PE=1 SV=1	14	13	27	13	1099	123.5	6.79	51.38	100.2	102.7	106.5	100.8	96.1	97.8	98	97.9
P84082	Arf2	ADP-ribosylation factor 2 OS=Rattus norvegicus OX=10116 GN=Arf2 PE=2 SV=1	47	8	30	1	181	20.7	6.58	75.17	116.2	101.5	99.5	98.5	99.8	85	96.1	103.3
P62982	Rps27a	Ubiquitin-40S ribosomal protein S27a OS=Rattus norvegicus OX=10116 GN=Rps27a PE=1 SV=2	50	9	61	1	156	17.9	9.64	122.4	95.5	98.8	98.2	97.9	101.1	107.2	99.9	101.5
F1LM84	Nid1	Nidogen-1 OS=Rattus norvegicus OX=10116 GN=Nid1 PE=1 SV=1	15	16	25	16	1246	137	5.47	45.3	97.1	93.1	96.7	94.1	102.6	104	105.9	106.5
Q5U2Q3		Ester hydrolase C11orf54 homolog OS=Rattus norvegicus OX=10116 PE=1 SV=1	35	11	30	11	315	35	6.62	68.81	98.5	102.7	99.2	100.7	99.2	101.6	99.3	98.8
A0A0G2JUC7	Dctn2	Dynactin subunit 2 OS=Rattus norvegicus OX=10116 GN=Dctn2 PE=1 SV=1	48	13	20	13	420	46.2	5.5	50.08	97.1	93.5	97.5	99.1	103.3	101.9	102.7	104.8
P19511	Atp5f1	ATP synthase F(0) complex subunit B1, mitochondrial OS=Rattus norvegicus OX=10116 GN=Atp5f1 PE=1 SV=1	31	11	46	11	256	28.9	9.36	78.4	102	100.7	100.7	103.5	98	98.1	98.3	98.7
P81155	Vdac2	Voltage-dependent anion-selective channel protein 2 OS=Rattus norvegicus OX=10116 GN=Vdac2 PE=1 SV=2	48	11	28	10	295	31.7	7.49	63.52	99.4	97.2	98.3	101	100.7	100.6	101.9	100.8
Q5U328	Ncl	Nucleolin OS=Rattus norvegicus OX=10116 GN=Ncl PE=1 SV=1	20	14	28	14	714	77.2	4.73	53.88	100.3	94.7	97.2	95.7	104.9	102.8	102.9	101.5
G3V786	Akr1b8	Aldo-keto reductase family 1, member B8 OS=Rattus norvegicus OX=10116 GN=Akr1b8 PE=1 SV=1	53	14	35	6	316	36.1	7.46	59.4	103	103.1	98.6	102.7	97.1	96.4	97.3	101.8
D3Z8E0	Rps6ka3	Ribosomal protein S6 kinase OS=Rattus norvegicus OX=10116 GN=Rps6ka3 PE=1 SV=2	22	16	26	10	740	83.7	6.89	53.16	98.7	97.6	98.3	97.4	101.8	100.3	102.2	103.7
D4A9W3	Dglucy	D-glutamate cyclase OS=Rattus norvegicus OX=10116 GN=Dglucy PE=1 SV=1	30	13	25	13	618	66	6.68	53.72	99.3	101.7	102.2	101.5	98.7	98.2	99.5	99
Q8R491	Ehd3	EH domain-containing protein 3 OS=Rattus norvegicus OX=10116 GN=Ehd3 PE=1 SV=2	36	17	25	2	535	60.8	6.46	53.2	107	100.9	99.8	104.2	93.1	100.2	98.4	96.4
Q63355	Myo1c	Unconventional myosin-Ic OS=Rattus norvegicus OX=10116 GN=Myo1c PE=1 SV=2	19	17	25	16	1044	119.7	9.39	44.48	99.5	101.6	99.9	99.2	100.5	100.8	99.5	99.1
G3V9D7	Add3	Adducin 3 (Gamma), isoform CRA_a OS=Rattus norvegicus OX=10116 GN=Add3 PE=1 SV=1	24	12	20	12	705	78.8	5.95	43.09	97.6	101.7	99.5	102.2	99	100.7	100.6	98.6
Q66H61	Qars	Glutamine--tRNA ligase OS=Rattus norvegicus OX=10116 GN=Qars PE=1 SV=1	29	17	24	17	775	87.6	7.31	48.09	97.4	99.3	98.7	96.7	102.2	101.2	102.6	101.9
P14659	Hspa2	Heat shock-related 70 kDa protein 2 OS=Rattus norvegicus OX=10116 GN=Hspa2 PE=1 SV=2	26	16	34	3	633	69.6	5.67	82.94	92.9	90.8	91.6	93	107.6	103.7	108.1	112.2
Q9JLA3	Uggt1	UDP-glucose:glycoprotein glucosyltransferase 1 OS=Rattus norvegicus OX=10116 GN=Uggt1 PE=1 SV=2	14	17	22	17	1551	176.3	5.66	37.72	102.7	95.4	97.1	94.4	99.6	102.6	102	106.2
A0A0G2JSK5	Itgb1	Integrin beta OS=Rattus norvegicus OX=10116 GN=Itgb1 PE=1 SV=1	17	12	30	12	798	88.3	6.01	61.46	97	98.4	96	97.9	105.6	101.9	100.5	102.7
P07340	Atp1b1	Sodium/potassium-transporting ATPase subunit beta-1 OS=Rattus norvegicus OX=10116 GN=Atp1b1 PE=1 SV=1	30	10	41	10	304	35.2	8.65	61.96	100.1	99.6	97.5	105.4	101.5	97.7	98.8	99.3
A0A0G2JXW4	Hnrnpc	Heterogeneous nuclear ribonucleoprotein C, isoform CRA_a OS=Rattus norvegicus OX=10116 GN=Hnrnpc PE=1 SV=1	34	10	27	10	313	34.4	5.05	55.21	93.8	89.9	93.3	92.8	107.2	107	108.5	107.5
P01048	Map1	T-kininogen 1 OS=Rattus norvegicus OX=10116 GN=Map1 PE=1 SV=2	30	9	28	3	430	47.7	6.52	69.77	105.9	108.5	114.5	111	89	92.1	91.3	87.7
P68255	Ywhaq	14-3-3 protein theta OS=Rattus norvegicus OX=10116 GN=Ywhaq PE=1 SV=1	48	11	39	5	245	27.8	4.78	81.96	92.4	93.8	90.6	95.4	106.2	108	106.7	106.8
P97524	Slc27a2	Very long-chain acyl-CoA synthetase OS=Rattus norvegicus OX=10116 GN=Slc27a2 PE=1 SV=1	21	12	25	12	620	70.6	8.59	51.44	102.7	103.5	101.8	101.6	97.5	96.9	97.1	98.9
W4VSR4	Nid2	Nidogen-2 OS=Rattus norvegicus OX=10116 GN=Nid2 PE=4 SV=2	14	13	21	13	1438	157.9	5.68	52.07	99.4	98.3	95.5	92.2	101.4	105.9	101.7	105.6
Q8VID1	Dhrs4	Dehydrogenase/reductase SDR family member 4 OS=Rattus norvegicus OX=10116 GN=Dhrs4 PE=2 SV=2	38	10	25	10	279	29.8	9.55	67.72	103.4	104.1	101.6	101.4	96.5	98.1	98	97
Q9QYU4	Crym	Ketimine reductase mu-crystallin OS=Rattus norvegicus OX=10116 GN=Crym PE=1 SV=1	34	9	27	9	313	33.5	5.53	65.48	102	104	105.9	103.1	98.1	99.2	96.2	91.5
G3V8B6	Psmd1	26S proteasome non-ATPase regulatory subunit 1 OS=Rattus norvegicus OX=10116 GN=Psmd1 PE=1 SV=1	21	15	22	15	953	105.6	5.39	46.36	100.6	95.8	103.6	94	101.2	104	101	99.8
P24464	Cyp4a12	Cytochrome P450 4A12 OS=Rattus norvegicus OX=10116 GN=Cyp4a12 PE=2 SV=2	20	10	32	8	508	58.5	9.32	62.99	99.5	97.9	101.1	98.5	101	99.8	102	100.1
M0R6L4	LOC100365839	40S ribosomal protein S3a OS=Rattus norvegicus OX=10116 GN=LOC100365839 PE=3 SV=1	54	16	33	16	264	29.9	9.73	59.69	93	94.1	95	94.6	105.1	106.6	106.1	105.6
G3V8C4	Clic4	Chloride intracellular channel protein OS=Rattus norvegicus OX=10116 GN=Clic4 PE=1 SV=1	59	12	32	12	253	28.7	5.59	44.5	100.9	104.5	103.2	99.7	98	98.5	98	97.3
P15429	Eno3	Beta-enolase OS=Rattus norvegicus OX=10116 GN=Eno3 PE=1 SV=3	25	7	31	1	434	47	7.44	101.32	90.7	94.9	107.2	98.3	107.5	94.8	102.5	104.2
Q64230	Mep1a	Meprin A subunit alpha OS=Rattus norvegicus OX=10116 GN=Mep1a PE=1 SV=2	23	12	22	12	748	85.1	6.04	56.74	105.6	107	105.6	103.4	97.2	92.1	93.7	95.4
F1LN92	Afg3l2	AFG3-like matrix AAA peptidase subunit 2 OS=Rattus norvegicus OX=10116 GN=Afg3l2 PE=1 SV=1	24	16	20	15	802	89.3	8.6	46.31	97	100.4	107.3	97.7	97.3	101.8	100.7	97.9
P54313	Gnb2	Guanine nucleotide-binding protein G(I)/G(S)/G(T) subunit beta-2 OS=Rattus norvegicus OX=10116 GN=Gnb2 PE=1 SV=4	40	11	24	6	340	37.3	6	66.51	96.7	92.3	93	100.4	107.2	99.3	105.5	105.6
Q63965	Sfxn1	Sideroflexin-1 OS=Rattus norvegicus OX=10116 GN=Sfxn1 PE=2 SV=4	39	10	31	1	322	35.5	9.06	62.8	104.6	95.2	92.5	97	106.9	101.4	100.9	101.5
P25235	Rpn2	Dolichyl-diphosphooligosaccharide--protein glycosyltransferase subunit 2 OS=Rattus norvegicus OX=10116 GN=Rpn2 PE=2 SV=2	26	10	21	10	631	69	5.97	62.68	99.7	97.5	98.7	97.4	102.6	98.8	102.8	102.4
Q99MA2	Xpnpep2	Xaa-Pro aminopeptidase 2 OS=Rattus norvegicus OX=10116 GN=Xpnpep2 PE=1 SV=1	21	13	24	13	674	76	5.74	58.03	102.1	101.6	102	102.4	98.7	94.8	98.2	100.3
G3V888	Acly	ATP-citrate synthase OS=Rattus norvegicus OX=10116 GN=Acly PE=1 SV=1	19	19	23	19	1101	120.7	7.44	47.39	97.9	96.2	95.8	94.8	103.7	104.2	102.8	104.7
Q64560	Tpp2	Tripeptidyl-peptidase 2 OS=Rattus norvegicus OX=10116 GN=Tpp2 PE=2 SV=3	17	19	24	19	1249	138.2	6.38	43.68	97.7	101	100.7	101.5	99.7	97.5	100.1	101.8
G3V6H2	Prpf8	Pre-mRNA processing factor 8, isoform CRA_a OS=Rattus norvegicus OX=10116 GN=Prpf8 PE=1 SV=1	11	19	22	19	2335	273.4	8.84	41.61	95.4	97	97.3	94.1	102.9	102.9	105	105.4
G3V8T4	Ddb1	DNA damage-binding protein 1 OS=Rattus norvegicus OX=10116 GN=Ddb1 PE=1 SV=1	16	15	22	15	1140	126.9	5.26	51.99	95.8	97.9	97.7	97.3	102.2	102.4	102.8	104
Q5M7T5	Serpinc1	Serine (Or cysteine) peptidase inhibitor, clade C (Antithrombin), member 1 OS=Rattus norvegicus OX=10116 GN=Serpinc1 PE=1 SV=1	35	16	22	16	465	52.2	6.57	45.26	97.5	97.7	100.4	100	102.2	100.7	101.1	100.3
P50475	Aars	Alanine--tRNA ligase, cytoplasmic OS=Rattus norvegicus OX=10116 GN=Aars PE=1 SV=3	15	12	21	12	968	106.7	5.62	45.11	99.6	96.8	97.7	99.5	100.8	100.3	104.3	101
P26772	Hspe1	10 kDa heat shock protein, mitochondrial OS=Rattus norvegicus OX=10116 GN=Hspe1 PE=1 SV=3	77	10	41	10	102	10.9	8.92	101.2	99.2	101.9	100.6	101.7	97.9	99.9	100.2	98.6
P62909	Rps3	40S ribosomal protein S3 OS=Rattus norvegicus OX=10116 GN=Rps3 PE=1 SV=1	54	14	29	14	243	26.7	9.66	65.64	95.6	95.6	96	97.6	103.2	104.9	104.4	102.7
Q08163	Cap1	Adenylyl cyclase-associated protein 1 OS=Rattus norvegicus OX=10116 GN=Cap1 PE=1 SV=3	42	13	25	13	474	51.6	7.52	40.5	91.6	102	100	95.2	104.1	103.5	101.5	102.1
Q01177	Plg	Plasminogen OS=Rattus norvegicus OX=10116 GN=Plg PE=2 SV=2	23	14	21	14	812	90.5	7.08	38.13	109.1	98.1	98.1	98.7	101.5	97.8	98.6	98
Q99068	Lrpap1	Alpha-2-macroglobulin receptor-associated protein OS=Rattus norvegicus OX=10116 GN=Lrpap1 PE=1 SV=2	40	15	25	15	360	42	7.37	47.03	101.6	98.4	94.6	99.5	105.3	100.1	101.5	99
Q63357	Myo1d	Unconventional myosin-Id OS=Rattus norvegicus OX=10116 GN=Myo1d PE=1 SV=3	17	16	24	16	1006	116	9.41	47.9	103.3	98.4	97.7	95.3	102	100.3	101.8	101.2
A0A0G2JZQ1	Ddx19b	DEAD-box helicase 19B OS=Rattus norvegicus OX=10116 GN=Ddx19b PE=1 SV=1	34	14	24	1	492	55.3	8.18	51.71	93.2	91.1	121.4	99	107	89.2	96.5	102.6
B0BNK1	Rab5c	RAB5C, member RAS oncogene family OS=Rattus norvegicus OX=10116 GN=Rab5c PE=1 SV=1	47	7	21	5	216	23.4	8.41	55.54	97	95.9	101.1	99.7	102.3	100.4	100.3	103.5
P62804	Hist1h4b	Histone H4 OS=Rattus norvegicus OX=10116 GN=Hist1h4b PE=1 SV=2	51	6	51	6	103	11.4	11.36	109.75	88.4	96.2	90.9	91.5	104.8	116.4	106.9	104.9
A0A0G2K0Q8	Susd2	Sushi domain-containing 2 OS=Rattus norvegicus OX=10116 GN=Susd2 PE=1 SV=1	14	9	20	9	825	90.6	6.39	47.5	104.1	105.1	103.9	99.4	96.6	96.3	98	96.5
A0A0G2K277	Eci3	Enoyl-Coenzyme A delta isomerase 3 OS=Rattus norvegicus OX=10116 GN=Eci3 PE=1 SV=1	34	10	30	8	379	42.3	9.07	67.59	100.8	98.4	99.4	102.2	100.2	99.4	100.1	99.5
P38918	Akr7a3	Aflatoxin B1 aldehyde reductase member 3 OS=Rattus norvegicus OX=10116 GN=Akr7a3 PE=1 SV=2	37	10	46	10	327	36.7	7.24	101.27	104.5	106.8	104.4	104.7	96.1	95.1	94.9	93.5
A0A0G2KAM3	Pdhb	Pyruvate dehydrogenase E1 component subunit beta, mitochondrial OS=Rattus norvegicus OX=10116 GN=Pdhb PE=1 SV=1	26	9	37	9	423	46.2	8.41	82.86	99.9	99.1	101.3	102.8	100.1	98.5	99.9	98.3
A0A0G2K1C0	Actr3	Actin-related protein 3 OS=Rattus norvegicus OX=10116 GN=Actr3 PE=1 SV=1	38	11	24	8	419	47.6	6.18	44.23	95	98	98.1	96.4	100	105.5	103.5	103.5
G3V7U4	Lmnb1	Lamin-B1 OS=Rattus norvegicus OX=10116 GN=Lmnb1 PE=1 SV=1	27	15	28	13	587	66.6	5.16	56.14	92.3	95.1	91.4	94.8	107.8	104.2	108.8	105.6
P09606	Glul	Glutamine synthetase OS=Rattus norvegicus OX=10116 GN=Glul PE=1 SV=3	39	13	31	13	373	42.2	7.08	45.68	94.9	99.3	96.1	96.7	103.6	104.9	102.4	102.1
P31044	Pebp1	Phosphatidylethanolamine-binding protein 1 OS=Rattus norvegicus OX=10116 GN=Pebp1 PE=1 SV=3	64	9	32	9	187	20.8	5.8	56.27	103.4	99.4	102.7	102.9	99.7	102	96.8	93.2
Q6AY99	Akr1b10	Aldo-keto reductase family 1, member B10 (Aldose reductase) OS=Rattus norvegicus OX=10116 GN=Akr1b10 PE=1 SV=1	36	12	31	6	316	36	8.32	57.83	104.8	107	103.7	103.3	95.1	97.1	93.6	95.4
P12928	Pklr	Pyruvate kinase PKLR OS=Rattus norvegicus OX=10116 GN=Pklr PE=1 SV=2	28	11	19	10	574	62.2	6.92	46.47	102.4	101.8	99.4	98.9	100.1	100.7	98.3	98.5
P0DMW0	Hspa1a	Heat shock 70 kDa protein 1A OS=Rattus norvegicus OX=10116 GN=Hspa1a PE=2 SV=1	26	15	24	9	641	70.1	5.82	58.97	91.6	96.6	95.5	93.9	108.4	103.8	106	104.1
B5DEH4	Uap1l1	UDP-N-acetylglucosamine pyrophosphorylase 1-like 1 OS=Rattus norvegicus OX=10116 GN=Uap1l1 PE=1 SV=1	35	14	20	13	507	56.4	5.66	42.73	108.8	100.3	98.8	97.1	98.6	99.2	99.8	97.6
Q6AYD3	Pa2g4	Proliferation-associated protein 2G4 OS=Rattus norvegicus OX=10116 GN=Pa2g4 PE=1 SV=1	39	12	24	12	394	43.6	6.86	52.97	101.1	99.6	97.2	96	102.8	101.3	102	100
D3ZHA0	Flnc	Filamin-C OS=Rattus norvegicus OX=10116 GN=Flnc PE=1 SV=1	5	13	30	1	2726	290.8	5.9	54.26	107.2	106.4	108.7	96.4	96.9	91.3	98.5	94.6
Q8CHM7	Hacl1	2-hydroxyacyl-CoA lyase 1 OS=Rattus norvegicus OX=10116 GN=Hacl1 PE=1 SV=1	22	10	21	10	581	63.6	7.33	39.04	103.7	105	101.7	105	96.8	93.9	97.4	96.4
Q8R3Z7	Ehd4	EH-domain-containing 4 OS=Rattus norvegicus OX=10116 GN=Ehd4 PE=1 SV=1	31	15	22	11	541	61.4	6.76	42.04	95.8	96.4	101.3	96.9	105.9	103.8	101.2	98.8
Q1JU68	Eif3a	Eukaryotic translation initiation factor 3 subunit A OS=Rattus norvegicus OX=10116 GN=Eif3a PE=2 SV=2	17	22	27	22	1354	163.1	6.77	55.21	102.1	96.7	100.7	99.7	99.6	99.8	101.2	100.3
P30835	Pfkl	ATP-dependent 6-phosphofructokinase, liver type OS=Rattus norvegicus OX=10116 GN=Pfkl PE=1 SV=3	20	12	21	10	780	85.3	7.4	46.45	103.4	96.2	98.5	103.8	103.3	100.1	98.3	96.5
Q6SKG1	Acsm3	Acyl-coenzyme A synthetase ACSM3, mitochondrial OS=Rattus norvegicus OX=10116 GN=Acsm3 PE=2 SV=1	23	11	23	10	580	65.7	7.99	50.29	96.8	96.6	102.3	100.9	103.8	99.4	100.7	99.5
P24268	Ctsd	Cathepsin D OS=Rattus norvegicus OX=10116 GN=Ctsd PE=1 SV=1	33	12	31	12	407	44.7	7.09	69.71	93	90.4	88.2	89.8	109.2	109.1	109	111.3
P80254	Ddt	D-dopachrome decarboxylase OS=Rattus norvegicus OX=10116 GN=Ddt PE=1 SV=3	71	6	21	6	118	13.1	6.54	61.39	100.3	98.5	103.3	102.2	98.7	100	97.9	99.1
A0A0G2K8P3	Nedd4	E3 ubiquitin-protein ligase OS=Rattus norvegicus OX=10116 GN=Nedd4 PE=1 SV=1	15	13	25	10	889	102.7	5.24	50.6	95.5	95.2	94.6	92.6	104.9	105.9	104.4	106.8
Q68FX3	Ddx19a	DEAD (Asp-Glu-Ala-Asp) box polypeptide 19a OS=Rattus norvegicus OX=10116 GN=Ddx19a PE=1 SV=1	34	14	24	1	478	53.9	6.74	50.84	96.7	103	110.4	99.7	98.8	96.4	96.1	98.9
Q6MG90	C4b	Complement C4B (Chido blood group) OS=Rattus norvegicus OX=10116 GN=C4b PE=1 SV=1	10	14	19	1	1737	192	7.05	48.23	89.5	103.6	85.2	116.2	102	97.3	96.6	109.7
A0A0G2K428	Dctn1	Dynactin subunit 1 OS=Rattus norvegicus OX=10116 GN=Dctn1 PE=1 SV=1	19	17	20	16	1263	139.8	5.69	50.58	96.8	102.1	100.1	96.9	101.3	99.5	100.2	103.1
A0A0G2K261	Iars2	Isoleucyl-tRNA synthetase 2, mitochondrial OS=Rattus norvegicus OX=10116 GN=Iars2 PE=1 SV=1	17	12	19	12	1011	112.6	6.74	45.64	102.4	100.2	103.5	98.2	102.1	98.9	98.9	95.8
A0A0G2K931	Psat1	Phosphoserine aminotransferase OS=Rattus norvegicus OX=10116 GN=Psat1 PE=1 SV=1	35	11	23	11	370	40.5	7.69	49.77	102.2	102.6	101.8	104.6	96.7	96.5	97.9	97.8
G3V6C2	Hgd	Homogentisate 1, 2-dioxygenase OS=Rattus norvegicus OX=10116 GN=Hgd PE=1 SV=1	26	10	27	10	445	49.9	7.09	56.25	103.2	102.2	103.7	105.1	96.9	95.7	97.1	96
P39052	Dnm2	Dynamin-2 OS=Rattus norvegicus OX=10116 GN=Dnm2 PE=1 SV=1	24	16	19	14	870	98.2	7.43	40.1	99.3	98.8	101.8	96.5	99.7	101.4	99.9	102.5
A0A0G2JSR0	Vdac3	Voltage-dependent anion-selective channel protein 3 OS=Rattus norvegicus OX=10116 GN=Vdac3 PE=1 SV=1	50	11	24	10	283	30.8	8.59	55.05	100.2	98.9	101.4	101.6	100.1	100.2	99.3	98.3
D3ZVQ0	Usp5	Ubiquitin carboxyl-terminal hydrolase OS=Rattus norvegicus OX=10116 GN=Usp5 PE=1 SV=1	21	15	21	15	858	95.7	5.01	41.44	96.3	101.7	99.3	93.8	102.5	102.3	102.1	102.1
Q9EPH8	Pabpc1	Polyadenylate-binding protein 1 OS=Rattus norvegicus OX=10116 GN=Pabpc1 PE=1 SV=1	21	14	22	12	636	70.7	9.5	39.71	95.9	94.5	95.4	97.1	103.3	104	104.9	104.9
P22734	Comt	Catechol O-methyltransferase OS=Rattus norvegicus OX=10116 GN=Comt PE=1 SV=2	28	8	24	8	264	29.6	5.66	46.92	93.3	96.1	94.9	95	102.3	106.2	107.9	104.4
D4ACG2	Ilvbl	IlvB (Bacterial acetolactate synthase)-like (Predicted), isoform CRA_c OS=Rattus norvegicus OX=10116 GN=Ilvbl PE=1 SV=1	16	6	13	6	672	72.2	8.28	38.41	97.5	98	102.9	97.5	100.6	100.3	105.2	97.9
P16970	Abcd3	ATP-binding cassette sub-family D member 3 OS=Rattus norvegicus OX=10116 GN=Abcd3 PE=1 SV=3	21	11	20	11	659	75.3	9.25	39.83	97.8	98.9	101.1	102	101.7	100	98.3	100.2
Q6P2A5	Ak3	GTP:AMP phosphotransferase AK3, mitochondrial OS=Rattus norvegicus OX=10116 GN=Ak3 PE=1 SV=1	43	9	23	9	227	25.5	8.85	49.65	99.9	101.3	106.2	101	100.5	95.1	99.9	95.9
A0A0G2K896	RGD1310507	Similar to RIKEN cDNA 1300017J02 OS=Rattus norvegicus OX=10116 GN=RGD1310507 PE=1 SV=1	21	12	24	11	700	76.7	6.96	47.58	96.2	103.3	102.2	97.5	101.8	99.1	98.8	100.9
O35814	Stip1	Stress-induced-phosphoprotein 1 OS=Rattus norvegicus OX=10116 GN=Stip1 PE=1 SV=1	28	16	27	16	543	62.5	6.8	34.82	98.9	99.2	99.1	99.2	101.5	101.5	100.3	100.3
Q06647	Atp5o	ATP synthase subunit O, mitochondrial OS=Rattus norvegicus OX=10116 GN=Atp5o PE=1 SV=1	49	9	29	9	213	23.4	10.02	70.78	102.6	104.1	103.1	103.2	96	98.4	96.7	95.8
Q66HG3	Cndp1	Beta-Ala-His dipeptidase OS=Rattus norvegicus OX=10116 GN=Cndp1 PE=1 SV=1	32	10	24	10	492	54.9	5.21	38.18	108.1	107.6	105.9	102.6	91.6	106.5	87.8	89.9
B2GV99	Myl6	Myl6 protein OS=Rattus norvegicus OX=10116 GN=Myl6 PE=2 SV=1	53	7	34	7	152	17	4.65	66.64	92.2	94.9	93.7	95.4	107.1	105.2	106.5	105
G3V9R9	Afm	Afamin OS=Rattus norvegicus OX=10116 GN=Afm PE=1 SV=1	21	11	19	11	608	69.2	6.21	31.1	103.8	92.7	94.3	101.6	102.3	97.6	102	105.8
F1LRE1	Gsr	Glutathione reductase OS=Rattus norvegicus OX=10116 GN=Gsr PE=1 SV=2	23	7	18	7	410	44.8	7.11	50.3	98	99.6	101.1	99.8	99.4	100.8	100.8	100.3
D4ABT8	Hnrnpul2	Heterogeneous nuclear ribonucleoprotein U-like 2 OS=Rattus norvegicus OX=10116 GN=Hnrnpul2 PE=1 SV=1	22	15	21	15	745	84.8	4.91	53.09	96.5	94.8	95	96.2	106.1	104	103.9	103.4
A0A0G2K1S6	Me1	Malic enzyme OS=Rattus norvegicus OX=10116 GN=Me1 PE=1 SV=1	24	9	13	9	571	63.8	6.67	44.89	104.1	103.8	104.2	105.3	96.9	94.7	96.7	94.2
A0A0A0MXX5	Bdh2	3-hydroxybutyrate dehydrogenase type 2 OS=Rattus norvegicus OX=10116 GN=Bdh2 PE=1 SV=1	37	8	24	8	255	27.7	6.57	58.88	101.3	102.3	102	103.2	98.1	97.7	97.3	98.2
P07687	Ephx1	Epoxide hydrolase 1 OS=Rattus norvegicus OX=10116 GN=Ephx1 PE=1 SV=1	35	14	26	14	455	52.5	8.51	53.93	103.5	102.3	110.3	104.2	95.5	92.8	95.6	95.8
F1LX07	Slc25a12	Solute carrier family 25 member 12 OS=Rattus norvegicus OX=10116 GN=Slc25a12 PE=1 SV=3	23	13	20	9	655	71.9	8.12	48.04	101.6	105	102.8	100.9	96.9	99.2	97	96.6
D3Z8P5		Uncharacterized protein OS=Rattus norvegicus OX=10116 PE=1 SV=2	37	10	22	2	319	35.2	8.03	45.58	99.2	97.6	98.6	99.8	100.3	101.9	101.9	100.9
B0K020	Cisd1	CDGSH iron-sulfur domain-containing protein 1 OS=Rattus norvegicus OX=10116 GN=Cisd1 PE=3 SV=1	44	5	31	5	108	12.1	8.84	73.71	100.5	99.6	103.2	99.7	98.3	101.2	99.4	98.2
Q66H80	Arcn1	Coatomer subunit delta OS=Rattus norvegicus OX=10116 GN=Arcn1 PE=2 SV=1	27	13	22	13	511	57.2	6.21	38.79	99.1	97	96.9	96.5	102	104.5	101.3	102.6
F1LPQ9	Akap2	A-kinase anchor protein 2 OS=Rattus norvegicus OX=10116 GN=Akap2 PE=1 SV=2	22	13	22	13	870	95.9	5.17	42.02	98.7	102.1	106.4	100.5	98.1	95.2	97.7	101.3
G3V7V6	Retsat	All-trans-13,14-dihydroretinol saturase, isoform CRA_b OS=Rattus norvegicus OX=10116 GN=Retsat PE=1 SV=1	26	14	20	14	609	67.4	8.81	50.49	109.4	104.7	107.3	106.2	92.3	93.4	92	94.7
P61983	Ywhag	14-3-3 protein gamma OS=Rattus norvegicus OX=10116 GN=Ywhag PE=1 SV=2	47	10	35	5	247	28.3	4.89	79.8	95.3	93.8	90.4	95	104.9	104.4	108.4	107.9
P84083	Arf5	ADP-ribosylation factor 5 OS=Rattus norvegicus OX=10116 GN=Arf5 PE=1 SV=2	44	7	26	2	180	20.5	6.79	67.1	93.8	97.9	98.7	99.4	103.8	104.6	99.8	102
F1LQJ7	Pck2	Phosphoenolpyruvate carboxykinase [GTP], mitochondrial OS=Rattus norvegicus OX=10116 GN=Pck2 PE=1 SV=2	19	10	19	10	641	71.2	8.34	45.17	101.1	96.6	98.5	97.2	100.6	100.4	101.6	104
D4A678	Spta1	Spectrin, alpha, erythrocytic 1 OS=Rattus norvegicus OX=10116 GN=Spta1 PE=1 SV=3	8	16	24	14	2416	279.9	5.03	50.97	106.6	107.4	105.6	106.6	95.6	93.3	91.9	92.9
A2VD16	Akr1c12l1	Aldo-keto reductase family 1, member C12-like 1 OS=Rattus norvegicus OX=10116 GN=Akr1c12l1 PE=2 SV=1	30	11	23	3	323	36.9	6.84	48.89	106.2	107.9	106.9	110.3	92	89.6	95.4	91.7
Q80U96	Xpo1	Exportin-1 OS=Rattus norvegicus OX=10116 GN=Xpo1 PE=1 SV=1	18	13	18	13	1071	123	6.07	40.01	95.3	96.5	103.9	98.2	103	102.9	98.9	101.4
Q6AYD5	Gspt1	Eukaryotic peptide chain release factor GTP-binding subunit ERF3B-like OS=Rattus norvegicus OX=10116 GN=Gspt1 PE=1 SV=1	30	14	18	14	636	68.7	5.21	38.9	94.7	94.8	96.1	98.4	105.8	100.4	104.8	105
P47853	Bgn	Biglycan OS=Rattus norvegicus OX=10116 GN=Bgn PE=1 SV=1	36	10	18	10	369	41.7	7.52	51.02	82	80.9	81.2	84.4	116.7	116.3	119.2	119.4
Q5I0D7	Pepd	Xaa-Pro dipeptidase OS=Rattus norvegicus OX=10116 GN=Pepd PE=2 SV=1	28	12	22	12	492	54.7	5.95	61.72	100.4	101.1	99.5	101.1	101.7	99.1	100.6	96.5
Q6AYQ8	Fahd1	Acylpyruvase FAHD1, mitochondrial OS=Rattus norvegicus OX=10116 GN=Fahd1 PE=1 SV=1	42	9	22	9	221	24.5	7.74	41.76	102.3	99.5	99.9	100.9	99.2	100.9	97.8	99.5
Q641Y2	Ndufs2	NADH dehydrogenase [ubiquinone] iron-sulfur protein 2, mitochondrial OS=Rattus norvegicus OX=10116 GN=Ndufs2 PE=1 SV=1	27	10	22	10	463	52.5	6.99	45.94	102	99.7	100	99.3	101.3	98.1	100.5	99
A0A0G2K4K4	Slc12a1	Solute carrier family 12 member 1 OS=Rattus norvegicus OX=10116 GN=Slc12a1 PE=1 SV=1	11	13	22	13	1159	126.5	7.74	47.52	102.8	100.5	102.1	102	97.6	97.6	98.9	98.5
D4AB01	Hint2	Histidine triad nucleotide binding protein 2 (Predicted), isoform CRA_a OS=Rattus norvegicus OX=10116 GN=Hint2 PE=1 SV=1	50	7	16	7	163	17.4	9.42	45.62	99.1	100.5	98.9	102.7	99.6	99.6	99.8	99.8
A0A0H2UHX3	Rps4x	40S ribosomal protein S4 OS=Rattus norvegicus OX=10116 GN=Rps4x PE=3 SV=1	32	9	22	9	290	32.5	10.07	52.18	93.5	95.1	96.6	96.3	103.7	103.3	106.3	105.3
F1LPK7	Pls3	Plastin 3 (T-isoform), isoform CRA_a OS=Rattus norvegicus OX=10116 GN=Pls3 PE=1 SV=2	26	15	24	11	630	70.7	5.54	51.01	100.5	98.5	101.5	96.1	101.5	100.7	100.9	100.2
A0A0G2K6G2	Apmap	Adipocyte plasma membrane-associated protein OS=Rattus norvegicus OX=10116 GN=Apmap PE=1 SV=1	31	13	24	13	415	46.4	6.14	56.78	100.1	98.9	96.6	98.6	100.7	101.2	103.9	100
Q63448	Acox3	Peroxisomal acyl-coenzyme A oxidase 3 OS=Rattus norvegicus OX=10116 GN=Acox3 PE=1 SV=1	20	10	17	10	700	78.4	8.19	36.76	99.7	103.3	95.5	95.6	102.3	99.9	105.1	98.6
P97571	Capn1	Calpain-1 catalytic subunit OS=Rattus norvegicus OX=10116 GN=Capn1 PE=1 SV=1	21	12	20	12	713	82.1	5.66	56.13	94.5	95.4	96.8	99.1	104.4	101	104.1	104.6
P35213	Ywhab	14-3-3 protein beta/alpha OS=Rattus norvegicus OX=10116 GN=Ywhab PE=1 SV=3	45	10	37	4	246	28	4.88	72.53	96.3	103.8	98.9	97.8	99	103.9	99.9	100.3
A0A0G2K9A2	Arpc2	Arp2/3 complex 34 kDa subunit OS=Rattus norvegicus OX=10116 GN=Arpc2 PE=1 SV=1	36	11	22	11	300	34.3	7.36	42.48	97.4	95.2	100.1	101.5	104.9	100.3	101.8	98.9
G3V7G8	Gars	Glycine--tRNA ligase OS=Rattus norvegicus OX=10116 GN=Gars PE=1 SV=1	22	14	18	14	728	81.7	6.57	44.2	97.8	96.5	98.9	97.4	102.5	100.3	105.1	101.6
O35889	Afdn	Afadin OS=Rattus norvegicus OX=10116 GN=Afdn PE=1 SV=1	11	16	20	16	1829	207.5	6.16	41.53	98	101.3	102.2	97.3	100.2	99.1	101.2	100.6
P62986	Uba52	Ubiquitin-60S ribosomal protein L40 OS=Rattus norvegicus OX=10116 GN=Uba52 PE=1 SV=2	54	9	59	1	128	14.7	9.83	113.1	97.5	101.3	103.9	91.8	92	104.3	102.8	106.3
Q6P136	Hyou1	Hyou1 protein OS=Rattus norvegicus OX=10116 GN=Hyou1 PE=1 SV=1	18	14	20	14	998	111.2	5.19	40.79	97.9	96.4	97	98.9	105	100.3	102.6	101.9
Q75WE7	Vwa5a	von Willebrand factor A domain-containing protein 5A OS=Rattus norvegicus OX=10116 GN=Vwa5a PE=2 SV=1	15	13	21	13	822	91.4	6.64	46.53	93.7	92	93.4	95.8	106.2	105.7	106	107.2
P28826	Mep1b	Meprin A subunit beta OS=Rattus norvegicus OX=10116 GN=Mep1b PE=1 SV=3	18	8	14	8	704	79.2	5.36	39.91	107.7	111.3	109	112.1	92.3	87.1	87.8	92.7
A0A0G2JSI0	Fmo3	Flavin-containing monooxygenase OS=Rattus norvegicus OX=10116 GN=Fmo3 PE=1 SV=1	23	13	26	12	531	59.9	8.05	38.87	104.3	104.5	103.2	104.7	96.4	97.9	94.6	94.4
O35987	Nsfl1c	NSFL1 cofactor p47 OS=Rattus norvegicus OX=10116 GN=Nsfl1c PE=1 SV=1	38	10	17	10	370	40.7	5.15	37.13	96.4	97.6	93.9	96.5	104	101.6	107.1	102.9
A0A0G2K2B3	Khsrp	Far upstream element-binding protein 2 OS=Rattus norvegicus OX=10116 GN=Khsrp PE=1 SV=1	27	15	19	14	748	76.7	7.33	39.58	94.7	94.6	97	94.9	105.5	102.6	104.2	106.5
Q6AYS2	Sfxn1	Sideroflexin OS=Rattus norvegicus OX=10116 GN=Sfxn1 PE=1 SV=1	37	10	29	1	322	35.6	9.07	57.54	99.5	100.2	101.4	102.3	98.4	99.8	100.4	97.9
P31399	Atp5h	ATP synthase subunit d, mitochondrial OS=Rattus norvegicus OX=10116 GN=Atp5h PE=1 SV=3	48	6	38	6	161	18.8	6.6	63.96	99.5	100.5	103.2	104.6	95.7	99.4	98.8	98.2
Q9WUS0	Ak4	Adenylate kinase 4, mitochondrial OS=Rattus norvegicus OX=10116 GN=Ak4 PE=2 SV=1	53	9	41	9	223	25.2	8.02	97.61	101.5	99	100	102.4	98.8	100.6	99	98.6
P47860	Pfkp	ATP-dependent 6-phosphofructokinase, platelet type OS=Rattus norvegicus OX=10116 GN=Pfkp PE=1 SV=2	26	14	20	12	788	85.7	7.28	29.93	97	97.5	99.2	97.4	102.5	100.8	100.4	105.3
G3V7L4	Cdh16	Cadherin 16 OS=Rattus norvegicus OX=10116 GN=Cdh16 PE=1 SV=1	26	11	21	11	830	90	4.6	65.07	104.2	106.1	104.7	104.4	95.9	93.6	93.8	97.3
G3V9E4	Apeh	Acylamino-acid-releasing enzyme OS=Rattus norvegicus OX=10116 GN=Apeh PE=1 SV=1	26	15	19	15	732	81.3	5.73	42.22	101.4	101.5	102.1	100.7	98.7	97.9	98.1	99.6
O08629	Trim28	Transcription intermediary factor 1-beta OS=Rattus norvegicus OX=10116 GN=Trim28 PE=1 SV=2	23	14	18	14	835	88.9	5.77	40.24	92.6	93.5	91.8	93.7	109.4	105.3	107	106.7
P84092	Ap2m1	AP-2 complex subunit mu OS=Rattus norvegicus OX=10116 GN=Ap2m1 PE=1 SV=1	35	14	22	14	435	49.6	9.54	39.88	99.4	98.4	98.9	97.9	101.1	100.1	100.8	103.3
A0A0G2JW72	Atp6v0a4	V-type proton ATPase subunit a OS=Rattus norvegicus OX=10116 GN=Atp6v0a4 PE=3 SV=1	18	11	21	11	829	95.1	6.34	52.66	103.2	101.6	99.1	104.9	97.7	96.3	97.9	99.4
P14669	Anxa3	Annexin A3 OS=Rattus norvegicus OX=10116 GN=Anxa3 PE=1 SV=4	53	14	22	12	324	36.3	6.35	38.32	93.2	94.2	92.2	94	106.2	108.2	106.9	105
Q8K4B7	Fmo4	Dimethylaniline monooxygenase [N-oxide-forming] 4 OS=Rattus norvegicus OX=10116 GN=Fmo4 PE=1 SV=3	24	12	19	11	560	63.6	9.06	41.84	103.3	102.9	108.1	106.1	94.1	97.3	95.2	93.1
A0A0G2JSH9	Prdx2	Peroxiredoxin-2 OS=Rattus norvegicus OX=10116 GN=Prdx2 PE=1 SV=1	27	6	22	6	198	21.8	5.59	73.41	104.6	100.5	104	107.9	97.3	96.9	93.2	95.7
D3ZT90	Gcdh	Glutaryl-CoA dehydrogenase OS=Rattus norvegicus OX=10116 GN=Gcdh PE=1 SV=1	21	7	16	7	447	49.7	8.72	40.85	104.9	104.2	103.6	104.4	97.4	98.5	95	91.9
Q80Z29	Nampt	Nicotinamide phosphoribosyltransferase OS=Rattus norvegicus OX=10116 GN=Nampt PE=1 SV=1	33	14	20	14	491	55.4	7.15	28.05	98.2	94.2	97.3	96.5	103.9	103	102.3	104.6
Q499N5	Acsf2	Acyl-CoA synthetase family member 2, mitochondrial OS=Rattus norvegicus OX=10116 GN=Acsf2 PE=2 SV=1	20	10	16	10	615	67.8	8.12	45.31	97.4	97.2	100.1	97.1	103.9	98.7	102.1	103.4
Q68G31	Pbld	Phenazine biosynthesis-like domain-containing protein OS=Rattus norvegicus OX=10116 GN=Pbld PE=2 SV=1	50	13	28	13	288	31.7	6.3	49.79	100.2	98	100	101.9	101.4	97.8	101.2	99.4
B5DF65	Blvrb	Biliverdin reductase B OS=Rattus norvegicus OX=10116 GN=Blvrb PE=1 SV=1	61	8	19	8	206	22.1	6.8	54.94	103.4	105.4	102.4	106.2	95.1	96.6	95.4	95.5
D3ZU13	Eif4g1	Eukaryotic translation initiation factor 4 gamma, 1 OS=Rattus norvegicus OX=10116 GN=Eif4g1 PE=1 SV=1	10	14	20	12	1598	175.6	5.38	29.48	98.9	99.4	98.1	96	102.3	100.3	102.3	102.6
A0A0G2JSH2	Bdh1	3-hydroxybutyrate dehydrogenase, type 1, isoform CRA_a OS=Rattus norvegicus OX=10116 GN=Bdh1 PE=1 SV=1	35	10	21	9	344	38.3	8.84	47.74	103.6	105.5	105.1	104.6	94.1	94.7	97.9	94.5
P34064	Psma5	Proteasome subunit alpha type-5 OS=Rattus norvegicus OX=10116 GN=Psma5 PE=1 SV=1	58	9	21	9	241	26.4	4.86	47.27	94.7	97.5	98.6	96.9	105.7	104.1	100.4	102.2
Q9ES21	Sacm1l	Phosphatidylinositide phosphatase SAC1 OS=Rattus norvegicus OX=10116 GN=Sacm1l PE=1 SV=1	24	13	19	13	587	67	7.28	45.73	97.6	98.5	96.8	94.8	96.7	103.3	102.7	109.7
D3ZFJ6	Lactb	Lactamase, beta OS=Rattus norvegicus OX=10116 GN=Lactb PE=1 SV=1	18	10	21	10	550	60.4	8.82	40.37	102.3	99.4	99.8	101.3	102	99.7	98.2	97.3
D4A781	Ipo5	Importin 5 OS=Rattus norvegicus OX=10116 GN=Ipo5 PE=1 SV=1	13	10	21	10	1097	123.6	4.96	39.62	98.6	96.8	98.8	96.3	104.3	99.4	103.8	101.9
P13084	Npm1	Nucleophosmin OS=Rattus norvegicus OX=10116 GN=Npm1 PE=1 SV=1	30	8	21	4	292	32.5	4.77	56.89	95.7	92.9	93.8	97	106	103.9	105.4	105.3
Q499P2	Lta4h	Leukotriene A(4) hydrolase OS=Rattus norvegicus OX=10116 GN=Lta4h PE=1 SV=1	22	12	24	12	611	69	6.2	56.25	99.1	97.5	97.3	95.2	103.8	101.1	103.5	102.5
D4A8H8	Cyfip1	Cytoplasmic FMR1-interacting protein OS=Rattus norvegicus OX=10116 GN=Cyfip1 PE=1 SV=1	13	14	18	14	1253	145.2	6.9	36.49	98.1	98.1	98.1	95.3	106.9	103	99.7	100.8
Q6TXG7	Shmt1	Serine hydroxymethyltransferase OS=Rattus norvegicus OX=10116 GN=Shmt1 PE=1 SV=1	21	13	24	12	681	75.3	7.93	45.19	101.6	101.7	103.9	100.5	97.3	98.8	96.7	99.5
P62755	Rps6	40S ribosomal protein S6 OS=Rattus norvegicus OX=10116 GN=Rps6 PE=1 SV=1	29	7	20	7	249	28.7	10.84	55.49	94.6	95.8	108.6	94.2	101.4	99.1	100.6	105.6
Q99J82	Ilk	Integrin-linked protein kinase OS=Rattus norvegicus OX=10116 GN=Ilk PE=2 SV=1	29	12	22	12	452	51.3	8.07	44.93	98.3	101.4	100.2	98.4	100.3	100.3	100.3	100.7
P61751	Arf4	ADP-ribosylation factor 4 OS=Rattus norvegicus OX=10116 GN=Arf4 PE=2 SV=2	39	6	24	2	180	20.4	7.14	69.01	101.6	98.8	95.1	97.5	105.2	98.3	103.8	99.7
D3Z8I7	Gstt3	Glutathione S-transferase, theta 3 OS=Rattus norvegicus OX=10116 GN=Gstt3 PE=1 SV=1	26	5	27	4	210	23.4	9.09	55.67	101	107.2	106.2	100.6	93.5	102.9	94.3	94.4
P24368	Ppib	Peptidyl-prolyl cis-trans isomerase B OS=Rattus norvegicus OX=10116 GN=Ppib PE=1 SV=3	42	11	24	11	216	23.8	9.5	60.18	96.8	93.9	94.4	95.5	105.4	103.9	104.7	105.3
P68511	Ywhah	14-3-3 protein eta OS=Rattus norvegicus OX=10116 GN=Ywhah PE=1 SV=2	37	9	32	4	246	28.2	4.89	78.62	93.6	93.9	97.1	93.8	107.5	105.5	106.2	102.4
Q0D2L3	Agmat	Agmatinase, mitochondrial OS=Rattus norvegicus OX=10116 GN=Agmat PE=2 SV=1	32	7	14	7	353	38	7.15	44.33	98	98.6	98.3	96.5	103.2	101.9	100.9	102.6
Q5M7U6	Actr2	Actin-related protein 2 OS=Rattus norvegicus OX=10116 GN=Actr2 PE=2 SV=1	24	8	23	7	394	44.7	6.74	51.03	93.8	94.7	95.9	95.9	105.3	107	105	102.4
B5DFC8	Eif3c	Eukaryotic translation initiation factor 3 subunit C OS=Rattus norvegicus OX=10116 GN=Eif3c PE=1 SV=1	17	13	21	13	911	105.4	5.78	51.08	97.9	98.3	98.4	95.6	101.7	101.9	102.2	104
P62836	Rap1a	Ras-related protein Rap-1A OS=Rattus norvegicus OX=10116 GN=Rap1a PE=1 SV=1	40	7	16	3	184	21	6.67	38.36	101.1	99.6	100.4	99.1	97.2	99.6	101.6	101.4
P97519	Hmgcl	Hydroxymethylglutaryl-CoA lyase, mitochondrial OS=Rattus norvegicus OX=10116 GN=Hmgcl PE=2 SV=1	36	11	20	11	325	34.2	8.41	53.36	113.3	103.4	106.9	101	94.6	93.2	94.7	92.8
O89049	Txnrd1	Thioredoxin reductase 1, cytoplasmic OS=Rattus norvegicus OX=10116 GN=Txnrd1 PE=1 SV=5	23	8	14	8	499	54.6	6.47	42.77	99	102.7	97.4	101.3	100.2	100	99.6	99.8
F1M885	Myo7b	Myosin VIIb OS=Rattus norvegicus OX=10116 GN=Myo7b PE=1 SV=2	8	17	22	16	2152	245.3	8.9	33.9	100	101	100.5	105	100.6	98	96.9	98
A0A0G2K1W9	Ldhd	Lactate dehydrogenase D OS=Rattus norvegicus OX=10116 GN=Ldhd PE=1 SV=1	28	11	23	11	482	51.8	7.11	48.41	106.7	103.2	102.7	104.5	96.5	94.9	95.7	95.8
D3ZZZ9	Ctnnd1	Catenin (Cadherin associated protein), delta 1 (Predicted), isoform CRA_a OS=Rattus norvegicus OX=10116 GN=Ctnnd1 PE=1 SV=1	13	11	21	11	932	104	6.95	36.56	100.7	98.1	97.5	96	102.4	100.4	103	101.9
Q6P9V7	Psme1	Proteasome (Prosome, macropain) activator subunit 1 OS=Rattus norvegicus OX=10116 GN=Psme1 PE=1 SV=1	54	12	22	12	249	28.6	5.81	29.72	99	95.2	94.1	94.9	103.1	105	104.2	104.5
A0A0G2K9J2	Atp6v1h	V-type proton ATPase subunit H OS=Rattus norvegicus OX=10116 GN=Atp6v1h PE=1 SV=1	23	8	15	8	483	55.8	6.61	39.75	103.9	103.2	105.4	106.6	93.7	96.2	96.6	94.4
A0A0G2JXI9	Hist1h2bo	Histone H2B OS=Rattus norvegicus OX=10116 GN=Hist1h2bo PE=3 SV=1	41	6	58	1	138	15.5	10.24	120.23	87.1	88.1	96.8	92.9	107.2	109.3	111.9	106.6
Q64550	Ugt1a1	UDP-glucuronosyltransferase 1-1 OS=Rattus norvegicus OX=10116 GN=Ugt1a1 PE=1 SV=1	16	7	19	3	535	59.6	8.48	41.94	109.4	101.7	112.7	105.3	92.7	95.3	94.1	88.8
D3ZNZ9	Hist3h2ba	Histone H2B OS=Rattus norvegicus OX=10116 GN=Hist3h2ba PE=3 SV=1	50	7	55	2	126	14	10.37	112.96	90.3	90.6	88	90.2	103.9	110.2	110	116.8
F1LNJ2	Snrnp200	U5 small nuclear ribonucleoprotein 200 kDa helicase OS=Rattus norvegicus OX=10116 GN=Snrnp200 PE=1 SV=1	8	13	16	13	2139	244.7	6.09	32.02	104.8	93.9	99.2	93.6	107.1	99.4	101.7	100.4
A0A0G2K2P5	Tjp1	Tight junction protein ZO-1 OS=Rattus norvegicus OX=10116 GN=Tjp1 PE=1 SV=1	11	14	18	14	1765	197	6.6	33.37	96.5	104	99.3	97.9	105.6	98.6	98.4	99.8
D3ZV91	L3hypdh	Similar to RIKEN cDNA 2810055F11 (Predicted) OS=Rattus norvegicus OX=10116 GN=L3hypdh PE=1 SV=1	37	8	14	8	354	37.9	6.52	43.23	104.1	102.1	100.5	102	96.9	97.6	97.1	99.7
D4A2K1	Hoga1	4-hydroxy-2-oxoglutarate aldolase 1 OS=Rattus norvegicus OX=10116 GN=Hoga1 PE=1 SV=1	28	8	26	8	321	34.4	8.24	55.53	103.6	101.6	103.3	102.3	98.1	95.7	96.2	99.1
P07323	Eno2	Gamma-enolase OS=Rattus norvegicus OX=10116 GN=Eno2 PE=1 SV=2	27	7	20	3	434	47.1	5.16	51	96.1	93.5	95	94.7	102	105.8	106.4	106.5
G3V836	Clu	Clusterin OS=Rattus norvegicus OX=10116 GN=Clu PE=1 SV=1	27	11	17	11	447	51.4	5.81	35.29	95	95.2	96.8	97.2	103.5	106.1	103.4	102.9
G3V741	Slc25a3	Phosphate carrier protein, mitochondrial OS=Rattus norvegicus OX=10116 GN=Slc25a3 PE=1 SV=1	33	12	32	12	356	39.5	9.26	71.9	102.9	104.1	100.6	102.3	96.8	97	98.5	97.7
P02680	Fgg	Fibrinogen gamma chain OS=Rattus norvegicus OX=10116 GN=Fgg PE=1 SV=3	21	12	22	12	445	50.6	5.96	45.49	108.9	109.5	111.6	113.5	90.1	89.3	89.2	87.9
Q6P762	Man2b1	Alpha-mannosidase OS=Rattus norvegicus OX=10116 GN=Man2b1 PE=1 SV=1	18	14	17	14	1009	114.3	8.66	30.92	98.7	102.2	104.7	101.5	101	98.3	99.4	94
Q5XI77	Anxa11	Annexin OS=Rattus norvegicus OX=10116 GN=Anxa11 PE=1 SV=1	22	9	18	8	503	54.1	7.65	45.56	98.3	94.9	97.3	97.4	105.1	99	105.9	102.1
F1LR02	Col18a1	Collagen type XVIII alpha 1 chain OS=Rattus norvegicus OX=10116 GN=Col18a1 PE=1 SV=2	7	8	18	8	1311	134.6	6.29	49.94	94.7	94.6	95.9	93.3	104.3	105.1	105.1	106.9
D3ZCT7	Sec23b	Sec23 homolog B, coat complex II component OS=Rattus norvegicus OX=10116 GN=Sec23b PE=1 SV=2	16	9	16	7	767	86.3	6.93	28.32	99.2	92.2	104.4	96.9	102.9	103	99.5	101.8
P10888	Cox4i1	Cytochrome c oxidase subunit 4 isoform 1, mitochondrial OS=Rattus norvegicus OX=10116 GN=Cox4i1 PE=1 SV=1	38	8	24	8	169	19.5	9.44	63.42	102.9	100.3	100.6	105.5	97.7	98.1	98.1	96.8
P46844	Blvra	Biliverdin reductase A OS=Rattus norvegicus OX=10116 GN=Blvra PE=1 SV=1	52	12	22	1	295	33.5	6.13	46.84	100.7	98.8	99.9	100.3	100.3	100.4	98.3	101.3
A0A0G2K6X9	Adk	Adenosine kinase OS=Rattus norvegicus OX=10116 GN=Adk PE=1 SV=1	27	9	22	9	403	44.1	6	42.23	99.7	98.4	100.2	100.2	100.3	99.3	101.3	100.6
Q6AZ33	Blvra	Biliverdin reductase A OS=Rattus norvegicus OX=10116 GN=Blvra PE=1 SV=1	52	12	22	1	295	33.5	6.34	46.72	118.8	115.4	120.5	116.6	83.9	78.7	82.9	83
Q5U2X8	Acot9	Acyl-CoA thioesterase 9 OS=Rattus norvegicus OX=10116 GN=Acot9 PE=1 SV=1	28	10	21	10	439	50.4	8.63	38.34	101.4	103.4	103.5	99.7	94.2	103.8	95.2	98.9
D3ZWL6	Ahcyl2	Adenosylhomocysteinase OS=Rattus norvegicus OX=10116 GN=Ahcyl2 PE=1 SV=3	21	12	21	4	612	66.8	7.36	44.63	98.7	99.8	99.9	98.8	98.9	102.3	102.9	98.7
D3ZUY8	Ap2a1	AP-2 complex subunit alpha OS=Rattus norvegicus OX=10116 GN=Ap2a1 PE=1 SV=1	17	15	19	10	977	107.6	7.06	42.77	98.7	93.5	101.6	98	100.1	102.5	103.5	102.2
P04897	Gnai2	Guanine nucleotide-binding protein G(i) subunit alpha-2 OS=Rattus norvegicus OX=10116 GN=Gnai2 PE=1 SV=3	33	9	18	3	355	40.5	5.45	38.97	96.4	94.9	88.7	91.2	106.9	103.6	107.4	110.8
Q63279	Krt19	Keratin, type I cytoskeletal 19 OS=Rattus norvegicus OX=10116 GN=Krt19 PE=1 SV=2	39	14	22	10	403	44.6	5.31	42.3	91.9	89	88.3	90.9	109.9	109	111.7	109.3
Q63413	Ddx39b	Spliceosome RNA helicase Ddx39b OS=Rattus norvegicus OX=10116 GN=Ddx39b PE=2 SV=3	35	12	21	8	428	49	5.67	44.43	96.2	105.1	96.7	97.3	101	100.8	101.7	101.1
Q5U3Z7	Shmt2	Serine hydroxymethyltransferase OS=Rattus norvegicus OX=10116 GN=Shmt2 PE=1 SV=1	33	12	20	11	504	55.7	8.21	46.92	101.5	101.1	100.1	98.9	100.6	97.8	100.2	99.7
P24090	Ahsg	Alpha-2-HS-glycoprotein OS=Rattus norvegicus OX=10116 GN=Ahsg PE=1 SV=2	26	7	29	7	352	38	6.51	83.67	94.2	95	98.2	96.2	103	103.1	105.5	104.7
M0RCH5	Gnpda1	Glucosamine-6-phosphate isomerase OS=Rattus norvegicus OX=10116 GN=Gnpda1 PE=1 SV=2	47	8	17	6	250	28	6.38	46.72	98	101.3	100.6	101.9	102.4	98	100.4	97.4
Q711G3	Iah1	Isoamyl acetate-hydrolyzing esterase 1 homolog OS=Rattus norvegicus OX=10116 GN=Iah1 PE=2 SV=2	41	8	23	8	249	28	5.95	64.3	100	98.8	97.5	100.6	100.9	100.9	100.3	100.9
P14141	Ca3	Carbonic anhydrase 3 OS=Rattus norvegicus OX=10116 GN=Ca3 PE=1 SV=3	35	7	12	7	260	29.4	7.37	37.57	92.9	93.7	90.3	91.2	105.8	109.5	106.5	110.2
P09811	Pygl	Glycogen phosphorylase, liver form OS=Rattus norvegicus OX=10116 GN=Pygl PE=1 SV=5	18	13	18	11	850	97.4	7.2	25.37	102.6	100.8	103.9	99.8	99.5	98.3	94.5	100.7
G3V7L6	Psmc2	26S proteasome regulatory subunit 7 OS=Rattus norvegicus OX=10116 GN=Psmc2 PE=1 SV=1	39	14	23	14	433	48.6	5.95	37.18	103.4	97.2	97.4	97.4	101.9	101.9	99.8	101
P04906	Gstp1	Glutathione S-transferase P OS=Rattus norvegicus OX=10116 GN=Gstp1 PE=1 SV=2	45	7	19	7	210	23.4	7.36	47.51	105.1	103.3	98.3	104.2	96.4	99.6	96.8	96.2
D3Z941	Mars	Methionyl-tRNA synthetase OS=Rattus norvegicus OX=10116 GN=Mars PE=1 SV=1	20	12	15	12	902	101.5	6.46	35.35	101.1	97.4	102	92.9	101.1	102.4	102.6	100.7
G3V936	Cs	Citrate synthase OS=Rattus norvegicus OX=10116 GN=Cs PE=1 SV=1	24	10	22	10	466	51.8	8.41	39.32	100.1	98.3	101.2	104.6	100.4	98.4	100.2	96.8
F1LSP2	Acad10	Acyl-CoA dehydrogenase family, member 10 OS=Rattus norvegicus OX=10116 GN=Acad10 PE=1 SV=2	14	13	18	13	1069	119.1	8.69	37.37	102.3	97.2	98.9	98.4	101.2	99.5	102.1	100.4
A0A0G2JSQ4	Tpm1	Tropomyosin 1, alpha, isoform CRA_p OS=Rattus norvegicus OX=10116 GN=Tpm1 PE=1 SV=1	29	9	35	1	248	28.5	4.77	70.85	89.4	89.3	85.7	93.6	112.8	104.9	113.1	111.2
A0A0G2JYI0	Lrba	LPS-responsive beige-like anchor protein OS=Rattus norvegicus OX=10116 GN=Lrba PE=1 SV=1	6	14	18	14	2783	309.3	5.74	36.29	101	97	102	97	102.2	99.5	100.2	101
B1H267	Snx5	Sorting nexin-5 OS=Rattus norvegicus OX=10116 GN=Snx5 PE=1 SV=1	30	11	17	10	404	46.8	6.62	43.84	97.9	101	96.1	98.6	101.5	100.8	102.7	101.4
P18614	Itga1	Integrin alpha-1 OS=Rattus norvegicus OX=10116 GN=Itga1 PE=1 SV=1	14	14	21	14	1180	130.7	5.96	30.56	96.3	100.1	97.5	94.8	102.6	104.2	102.3	102.1
F1LZX7	Rpl17	60S ribosomal protein L17 OS=Rattus norvegicus OX=10116 GN=Rpl17 PE=1 SV=2	41	8	19	7	204	23.5	10.17	37.74	95.1	93.7	94	97.5	105.3	105.8	104.7	103.9
P21913	Sdhb	Succinate dehydrogenase [ubiquinone] iron-sulfur subunit, mitochondrial OS=Rattus norvegicus OX=10116 GN=Sdhb PE=2 SV=2	32	10	21	10	282	31.8	8.68	46.61	98.8	100.3	99.8	103.1	99	101.7	98.3	99.1
P57113	Gstz1	Maleylacetoacetate isomerase OS=Rattus norvegicus OX=10116 GN=Gstz1 PE=1 SV=2	46	7	17	7	216	23.9	7.77	39.23	103.6	98.3	105.6	103.6	96.9	97.6	96.3	98.1
A0A0U1RRV5	Cluh	Clustered mitochondria protein homolog OS=Rattus norvegicus OX=10116 GN=Cluh PE=1 SV=1	13	15	17	15	1349	151.1	6.02	40.35	99.5	98.5	101.1	98.2	103.4	101.6	98.4	99.3
P27605	Hprt1	Hypoxanthine-guanine phosphoribosyltransferase OS=Rattus norvegicus OX=10116 GN=Hprt1 PE=1 SV=1	37	7	16	7	218	24.5	6.54	36.06	95.3	99.2	98	98.7	102	102.1	102.3	102.4
G3V6V1	Rnpep	Aminopeptidase B OS=Rattus norvegicus OX=10116 GN=Rnpep PE=1 SV=1	20	10	18	10	650	72.6	5.59	39.89	100.5	98.6	103	97.5	100.2	100.9	100.2	99
P48675	Des	Desmin OS=Rattus norvegicus OX=10116 GN=Des PE=1 SV=2	25	13	21	9	469	53.4	5.27	39.93	95.3	92.4	95.6	92.2	106.3	104.1	106.5	107.5
P11232	Txn	Thioredoxin OS=Rattus norvegicus OX=10116 GN=Txn PE=1 SV=2	57	6	24	6	105	11.7	4.92	50.55	100.3	97	95.8	102.4	102.4	102.6	101.7	97.9
D3ZLL8	LOC100909878	40S ribosomal protein S15a-like OS=Rattus norvegicus OX=10116 GN=LOC100909878 PE=3 SV=1	58	7	18	7	130	14.8	10.13	43.07	95.4	98.8	97.9	96.9	103.4	102.4	103.5	101.7
A0A0A0MY00	Acadsb	Short/branched chain-specific acyl-CoA dehydrogenase, mitochondrial OS=Rattus norvegicus OX=10116 GN=Acadsb PE=1 SV=2	26	9	16	9	469	52	8.62	33.13	98.2	99.5	100.8	97.1	99.5	102	98.5	104.4
Q6IN37	Gm2a	GM2 ganglioside activator OS=Rattus norvegicus OX=10116 GN=Gm2a PE=1 SV=1	40	7	38	7	199	21.5	6.52	104.38	102.7	101.7	100	102.3	97.9	98.8	98.1	98.6
A0A0G2JY08	Myo18a	Myosin XVIIIa OS=Rattus norvegicus OX=10116 GN=Myo18a PE=1 SV=1	9	15	18	15	2054	233.2	6.24	27.76	101.2	96.9	103	97	103.6	101.4	99.5	97.4
B5DFC3	Sec23a	SEC23A (S. cerevisiae) (Predicted) OS=Rattus norvegicus OX=10116 GN=Sec23a PE=1 SV=1	12	8	14	6	765	86.1	7.08	29.82	101.7	95.8	98.4	96.6	103.1	101.2	100.7	102.6
Q6T5E9	Ugt1a6	UDP-glucuronosyltransferase OS=Rattus norvegicus OX=10116 GN=Ugt1a6 PE=1 SV=1	23	8	17	4	530	60.2	8.69	38.04	106.1	103.6	106.1	107	96.2	94.3	94.1	92.5
P00388	Por	NADPH--cytochrome P450 reductase OS=Rattus norvegicus OX=10116 GN=Por PE=1 SV=3	17	10	19	10	678	76.9	5.48	37.3	99.8	103.5	102.1	98.8	98.7	99.9	99.1	98.1
D3ZLC1	Lmnb2	Lamin B2 OS=Rattus norvegicus OX=10116 GN=Lmnb2 PE=1 SV=2	26	13	21	11	616	68.8	5.26	37.32	97.1	95.4	98.1	94.1	106	99.5	104.3	105.5
D3ZCA0	Plpbp	Pyridoxal phosphate homeostasis protein OS=Rattus norvegicus OX=10116 GN=Plpbp PE=1 SV=1	52	10	24	10	275	30.1	7.93	34.69	99.8	100.5	100.7	98.5	99.6	101.4	100.3	99.2
F1M0Q9	Pm20d1	Peptidase M20 domain-containing 1 OS=Rattus norvegicus OX=10116 GN=Pm20d1 PE=1 SV=3	24	9	15	9	472	52.5	7.08	46.05	95.9	95.9	96.2	96.3	101.1	103.2	106.1	105.4
F1MA98	Tpr	Nucleoprotein TPR OS=Rattus norvegicus OX=10116 GN=Tpr PE=1 SV=1	8	15	18	15	2360	267.1	5	32.22	101.3	98.5	100.7	98.2	103	96.2	97.5	104.4
Q6AYT3	Rtcb	tRNA-splicing ligase RtcB homolog OS=Rattus norvegicus OX=10116 GN=Rtcb PE=2 SV=1	28	13	19	13	505	55.2	7.23	41.45	98.7	98.7	98.4	100.1	101.6	101.4	100.8	100.3
Q9JMB3	Epb41l3	Erythrocyte membrane protein band 4.1-like 3 OS=Rattus norvegicus OX=10116 GN=Epb41l3 PE=1 SV=1	16	14	22	11	1105	122.4	5.12	30.14	104.9	98.5	101.7	101	100.7	98.2	96.9	98
F1LQS3		60S ribosomal protein L6 OS=Rattus norvegicus OX=10116 PE=3 SV=1	30	10	17	10	298	33.5	10.74	40.95	98.5	95.3	92.2	96.5	104.8	102.7	104.4	105.7
P18886	Cpt2	Carnitine O-palmitoyltransferase 2, mitochondrial OS=Rattus norvegicus OX=10116 GN=Cpt2 PE=1 SV=1	19	11	17	11	658	74.1	7.33	38.67	104.5	104	105	104.7	96.5	96.3	94.7	94.4
A0A140UHX6	Sptb	Spectrin beta chain OS=Rattus norvegicus OX=10116 GN=Sptb PE=1 SV=1	5	13	22	6	2329	267.9	5.45	37.8	113.6	108.2	113.3	113	90.6	88.5	88.3	84.5
Q6P0K8	Jup	Junction plakoglobin OS=Rattus norvegicus OX=10116 GN=Jup PE=1 SV=1	22	12	17	6	745	81.7	6.14	34.36	94.8	92.2	99.8	97.5	99.4	102.5	108.7	105.1
F1LM66	Eftud2	Elongation factor Tu GTP-binding domain-containing 2 OS=Rattus norvegicus OX=10116 GN=Eftud2 PE=1 SV=2	17	12	17	11	971	109.3	5	41.81	97.7	95.5	98.2	94.1	105.2	103.3	103	103
A0A0A0MXW1	Bckdhb	2-oxoisovalerate dehydrogenase subunit beta, mitochondrial OS=Rattus norvegicus OX=10116 GN=Bckdhb PE=1 SV=1	47	11	21	11	391	42.9	6.9	30.51	103.3	103.6	102	103.4	97.7	94.5	97.7	97.8
Q5XIC0	Eci2	Enoyl-CoA delta isomerase 2, mitochondrial OS=Rattus norvegicus OX=10116 GN=Eci2 PE=1 SV=1	26	7	23	5	391	43	8.98	48.17	109.3	106.4	109.9	107	95.9	85	91.6	94.8
A0A0G2JSK9	Bhmt	Betaine--homocysteine S-methyltransferase 1 OS=Rattus norvegicus OX=10116 GN=Bhmt PE=1 SV=1	33	11	17	7	407	45	7.9	40.32	101.6	102.4	101.5	101.7	99.9	98.4	97.3	97.1
Q5M9I2	Man2c1	Alpha-mannosidase 2C1 OS=Rattus norvegicus OX=10116 GN=Man2c1 PE=1 SV=1	18	13	15	13	1039	115.8	6.46	31.94	95.7	100.8	97.8	98	95.8	99.7	97.5	114.5
Q923M1	Msra	Mitochondrial peptide methionine sulfoxide reductase OS=Rattus norvegicus OX=10116 GN=Msra PE=1 SV=1	46	8	18	8	233	25.8	8.07	43.67	104.5	104.2	104	103.6	94.2	97.8	95.9	95.8
O35509	Rab11b	Ras-related protein Rab-11B OS=Rattus norvegicus OX=10116 GN=Rab11b PE=1 SV=4	42	8	22	8	218	24.5	5.94	55.96	97.2	96.1	97	97.1	105	100.4	104.4	102.8
A0A0G2K6D5	Pitrm1	Pitrilysin metallopeptidase 1 OS=Rattus norvegicus OX=10116 GN=Pitrm1 PE=1 SV=1	12	10	15	10	1035	117.3	6.89	28.13	98.4	96.2	111.1	95.2	100.9	100.2	100.8	97.1
D3ZD97	Dhx15	DEAH (Asp-Glu-Ala-His) box polypeptide 15 (Predicted), isoform CRA_b OS=Rattus norvegicus OX=10116 GN=Dhx15 PE=1 SV=1	20	12	16	12	795	90.9	7.46	32.57	97.6	106.3	102.8	94	99.4	99.6	102.2	98
Q68FT9	Scly	Selenocysteine lyase OS=Rattus norvegicus OX=10116 GN=Scly PE=1 SV=1	20	8	14	8	432	47.2	6.61	36.85	101.2	102.8	100.8	104	97.3	97.6	97.8	98.3
Q9Z1E1	Flot1	Flotillin-1 OS=Rattus norvegicus OX=10116 GN=Flot1 PE=2 SV=2	25	8	17	8	428	47.5	7.15	35.11	92.7	98.3	97	94.6	105.9	101.2	105.8	104.5
B5DEH2	Erlin2	Erlin-2 OS=Rattus norvegicus OX=10116 GN=Erlin2 PE=1 SV=1	35	10	17	10	339	37.7	5.74	40.91	94.8	93.3	94.3	97.1	104.2	104.6	106.7	105
P63159	Hmgb1	High mobility group protein B1 OS=Rattus norvegicus OX=10116 GN=Hmgb1 PE=1 SV=2	29	9	18	8	215	24.9	5.74	42.05	91.4	91.8	98.6	90.5	106.4	108	107.9	105.4
A0A0G2JSU8	Cyp2d1	Cytochrome P450 2D3 OS=Rattus norvegicus OX=10116 GN=Cyp2d1 PE=1 SV=1	21	8	15	4	504	57.1	7.3	38.8	111.1	109.2	110.2	104.7	92.4	88.4	91.1	92.9
Q64303	Pak2	Serine/threonine-protein kinase PAK 2 OS=Rattus norvegicus OX=10116 GN=Pak2 PE=1 SV=1	23	8	12	7	524	57.9	5.77	34.77	97	94.8	98.7	98.6	103.9	102.4	102.2	102.4
Q6MG60	Ddah2	N(G),N(G)-dimethylarginine dimethylaminohydrolase 2 OS=Rattus norvegicus OX=10116 GN=Ddah2 PE=1 SV=1	40	8	14	7	285	29.7	6.01	37.56	99.7	102.7	103.7	95.3	101.8	98.5	98.3	100
O35142	Copb2	Coatomer subunit beta' OS=Rattus norvegicus OX=10116 GN=Copb2 PE=1 SV=3	16	13	15	13	905	102.5	5.27	33.89	97.1	97.9	99.4	95.9	103.7	102.5	101.7	101.9
Q06496	Slc34a1	Sodium-dependent phosphate transport protein 2A OS=Rattus norvegicus OX=10116 GN=Slc34a1 PE=1 SV=1	20	12	18	12	637	68.7	8.73	30.51	95.5	97.1	92.2	97.8	103.6	102.1	105.2	106.5
P62907	Rpl10a	60S ribosomal protein L10a OS=Rattus norvegicus OX=10116 GN=Rpl10a PE=1 SV=2	33	7	18	7	217	24.8	9.94	43.58	101.7	95.7	93.3	94.5	105.4	102.9	103.7	102.8
A0A0G2K8S6	LOC103692171	Glucosidase 1 OS=Rattus norvegicus OX=10116 GN=LOC103692171 PE=1 SV=1	15	9	18	9	834	91.9	9.11	40.87	96.2	99.3	97.6	97.5	105.2	97.1	102.1	105
O88797	Dab2	Disabled homolog 2 OS=Rattus norvegicus OX=10116 GN=Dab2 PE=1 SV=1	14	9	19	9	768	82.3	6.19	42.67	99.9	99.7	102	100.6	101.6	99.9	99.7	96.6
P07895	Sod2	Superoxide dismutase [Mn], mitochondrial OS=Rattus norvegicus OX=10116 GN=Sod2 PE=1 SV=2	30	7	24	7	222	24.7	8.81	61.94	102	100.8	105.7	104.2	97.1	97.2	98.1	95
P81795	Eif2s3	Eukaryotic translation initiation factor 2 subunit 3, X-linked OS=Rattus norvegicus OX=10116 GN=Eif2s3 PE=1 SV=2	25	9	17	3	472	51	8.4	31.89	103.9	98.1	98.1	98.8	99.8	101.9	99.4	99.9
F7FF45	Numa1	Nuclear mitotic apparatus protein 1 OS=Rattus norvegicus OX=10116 GN=Numa1 PE=1 SV=2	8	14	14	14	2091	234.8	5.73	35.97	96.1	107.6	100.3	96.9	105.9	96.1	99	98.1
G3V843	F2	Prothrombin OS=Rattus norvegicus OX=10116 GN=F2 PE=1 SV=1	24	10	15	10	617	70.3	6.71	33.82	98.7	98.9	101.6	99.4	99.4	99.9	100.7	101.2
P16232	Hsd11b1	Corticosteroid 11-beta-dehydrogenase isozyme 1 OS=Rattus norvegicus OX=10116 GN=Hsd11b1 PE=1 SV=2	30	9	22	9	288	31.9	8.38	46.93	100.1	98.6	99.2	99.7	100.5	101.5	101.7	98.7
Q8CFN2	Cdc42	Cell division control protein 42 homolog OS=Rattus norvegicus OX=10116 GN=Cdc42 PE=1 SV=2	37	6	20	5	191	21.2	6.55	41.44	95.5	95.4	94.8	93	104.1	106.6	102.6	108.1
F1LW74	Iqgap2	IQ motif-containing GTPase-activating protein 2 OS=Rattus norvegicus OX=10116 GN=Iqgap2 PE=1 SV=3	11	14	17	13	1425	162.9	5.44	35.34	98.1	96.7	99.3	98.4	100.3	100.5	105	101.8
D4A1J6	Ankfy1	Ankyrin repeat and FYVE domain-containing 1 OS=Rattus norvegicus OX=10116 GN=Ankfy1 PE=1 SV=3	15	14	16	14	1169	128.6	5.94	26.02	102.4	99.4	99	101.5	102.7	96.9	100.4	97.7
Q794E4	Hnrnpf	Heterogeneous nuclear ribonucleoprotein F OS=Rattus norvegicus OX=10116 GN=Hnrnpf PE=1 SV=3	23	7	12	6	415	45.7	5.49	24.77	95.1	96.7	96.3	97.9	105.9	102.6	103.1	102.3
P21531	Rpl3	60S ribosomal protein L3 OS=Rattus norvegicus OX=10116 GN=Rpl3 PE=1 SV=3	27	12	23	12	403	46.1	10.21	51.72	117.1	94.6	92.2	93.1	102.1	98.2	101.7	101.1
G3V709	Naprt	Nicotinate phosphoribosyltransferase OS=Rattus norvegicus OX=10116 GN=Naprt PE=1 SV=1	21	9	16	9	538	58.6	6.35	41.73	95.9	96	94.9	98	103.8	104.2	102.1	105.1
P35565	Canx	Calnexin OS=Rattus norvegicus OX=10116 GN=Canx PE=1 SV=1	17	9	24	9	591	67.2	4.63	44.97	94	95.4	94.2	98.7	103.5	104.5	106.3	103.6
F1LQI5	Ubr4	E3 ubiquitin-protein ligase UBR4 OS=Rattus norvegicus OX=10116 GN=Ubr4 PE=1 SV=1	4	14	14	14	5194	573.4	6.05	29.58	100.7	101	101.5	96.9	102.2	102.3	98.5	96.8
Q0VGK3	Glyctk	Glycerate kinase OS=Rattus norvegicus OX=10116 GN=Glyctk PE=1 SV=1	24	8	15	8	523	55.2	6.28	35.73	100	98.6	99.3	102.3	100.8	97.9	99.6	101.6
Q4V8I9	Ugp2	UTP--glucose-1-phosphate uridylyltransferase OS=Rattus norvegicus OX=10116 GN=Ugp2 PE=1 SV=1	26	11	17	11	508	57	7.61	34.61	102.2	100.3	99.8	98.1	99.9	100.2	99.2	100.3
P19234	Ndufv2	NADH dehydrogenase [ubiquinone] flavoprotein 2, mitochondrial OS=Rattus norvegicus OX=10116 GN=Ndufv2 PE=1 SV=2	41	9	22	9	248	27.4	6.68	63.87	99.9	99.3	103.1	102.7	98.3	97.8	97.9	101.1
F1LPB8	Entpd5	Ectonucleoside triphosphate diphosphohydrolase 5 OS=Rattus norvegicus OX=10116 GN=Entpd5 PE=1 SV=2	25	8	15	8	427	47.4	5.16	31.64	104	99.4	100.4	101.9	99.8	98.5	98.5	97.5
P14942	Gsta4	Glutathione S-transferase alpha-4 OS=Rattus norvegicus OX=10116 GN=Gsta4 PE=1 SV=2	37	9	23	7	222	25.5	7.33	46.27	105.4	101	97.8	96.7	96.9	101.2	99.5	101.4
Q6DGG0	Ppid	Peptidyl-prolyl cis-trans isomerase D OS=Rattus norvegicus OX=10116 GN=Ppid PE=1 SV=3	25	9	18	9	370	40.7	7.17	32.95	97.6	94.5	93.5	96.2	107	100.9	106.4	103.9
Q3T1K5	Capza2	F-actin-capping protein subunit alpha-2 OS=Rattus norvegicus OX=10116 GN=Capza2 PE=1 SV=1	30	7	14	6	286	32.9	5.85	42.65	95.9	92.8	98.6	97.4	104.9	100.6	105	104.7
B0K031	Rpl7	60S ribosomal protein L7 OS=Rattus norvegicus OX=10116 GN=Rpl7 PE=1 SV=1	33	11	18	11	260	30.3	10.87	34.94	95.8	93.6	95.3	95.9	104.3	103.4	105.8	105.8
Q641X3	Hexa	Beta-hexosaminidase subunit alpha OS=Rattus norvegicus OX=10116 GN=Hexa PE=2 SV=1	27	10	15	10	528	60.5	7.24	27.75	101	102.8	104.1	97.6	97.4	97	101.3	98.8
A0A0G2K8K0	Sfpq	Splicing factor proline and glutamine rich OS=Rattus norvegicus OX=10116 GN=Sfpq PE=1 SV=1	16	8	15	8	696	75	9.39	27.1	90.3	90.9	93.4	92.5	105.5	107.8	109.5	110
P62138	Ppp1ca	Serine/threonine-protein phosphatase PP1-alpha catalytic subunit OS=Rattus norvegicus OX=10116 GN=Ppp1ca PE=1 SV=1	34	8	18	2	330	37.5	6.33	26.26	92	97.8	90.1	100.1	107.1	105.2	102.4	105.3
D4A5T8	Ppl	Periplakin OS=Rattus norvegicus OX=10116 GN=Ppl PE=1 SV=1	9	13	15	13	1754	204	5.45	28.07	92.2	95.8	95.5	91.8	109.3	106.8	104.1	104.5
P11505	Atp2b1	Plasma membrane calcium-transporting ATPase 1 OS=Rattus norvegicus OX=10116 GN=Atp2b1 PE=1 SV=2	12	11	15	8	1258	138.6	6	21.06	99.1	97.6	97.6	96.9	101.4	106.8	98.7	101.8
P30713	Gstt2	Glutathione S-transferase theta-2 OS=Rattus norvegicus OX=10116 GN=Gstt2 PE=1 SV=3	29	6	20	5	244	27.4	7.91	55.29	96.7	103	100.6	100.4	99.2	103.8	99.8	96.4
A0A096MIX2	Ddx17	DEAD (Asp-Glu-Ala-Asp) box polypeptide 17, isoform CRA_a OS=Rattus norvegicus OX=10116 GN=Ddx17 PE=1 SV=1	15	9	21	4	652	72.6	8.68	44.02	94.3	98.1	90.9	93.7	107.5	106.7	106.6	102
Q6AYW2	Pah	Phenylalanine hydroxylase OS=Rattus norvegicus OX=10116 GN=Pah PE=1 SV=1	29	10	22	10	453	51.8	6.1	51.72	97.7	100.7	100.5	99.9	102.2	100.2	99.7	99
Q5BJY9	Krt18	Keratin, type I cytoskeletal 18 OS=Rattus norvegicus OX=10116 GN=Krt18 PE=1 SV=3	26	12	18	10	423	47.7	5.26	39.09	89.8	96.6	99.7	91.7	105.2	104.5	105.9	106.8
Q5RJR8	Lrrc59	Leucine-rich repeat-containing protein 59 OS=Rattus norvegicus OX=10116 GN=Lrrc59 PE=1 SV=1	36	9	14	9	307	34.8	9.52	31.07	95.9	93.6	95.7	98.4	104.4	105.9	103.8	102.3
P62278	Rps13	40S ribosomal protein S13 OS=Rattus norvegicus OX=10116 GN=Rps13 PE=1 SV=2	49	9	23	9	151	17.2	10.54	44.59	99.3	98.2	95.8	94.2	102.7	103.1	103.7	103
Q07009	Capn2	Calpain-2 catalytic subunit OS=Rattus norvegicus OX=10116 GN=Capn2 PE=1 SV=3	17	10	14	10	700	79.9	4.96	32.48	93.8	97	97.2	96.4	105.5	102.5	106.1	101.5
F8WFT7	Slc4a1	Anion exchange protein OS=Rattus norvegicus OX=10116 GN=Slc4a1 PE=1 SV=1	15	11	17	11	928	103.2	5.41	40.65	117.6	118.2	118.4	115.5	81.6	82	81.3	85.5
O89035	Slc25a10	Mitochondrial dicarboxylate carrier OS=Rattus norvegicus OX=10116 GN=Slc25a10 PE=1 SV=1	43	9	17	9	286	31.4	9.29	32.41	101.4	107.3	106.9	102.9	95.3	101.4	93	91.7
Q6TXF3	Dbi	Acyl-CoA-binding protein OS=Rattus norvegicus OX=10116 GN=Dbi PE=1 SV=1	7	3	18	3	600	66.4	8.72	48.76	96.2	102.1	99.2	99.9	96.2	109.7	100.5	96.4
M0R9I6	Amt	Aminomethyltransferase OS=Rattus norvegicus OX=10116 GN=Amt PE=1 SV=2	31	9	18	9	403	44.5	9.96	36.25	101.5	103.4	100.3	101.5	96.4	101.3	96.9	98.8
P50503	St13	Hsc70-interacting protein OS=Rattus norvegicus OX=10116 GN=St13 PE=1 SV=1	24	9	19	9	368	41.3	5.39	39.31	100.3	97.1	97.2	97.3	102.1	101.5	101.2	103.3
Q3MHS3	Akr1c1	Aldo-keto reductase family 1, member C1 OS=Rattus norvegicus OX=10116 GN=Akr1c1 PE=1 SV=1	29	10	19	7	323	37	8.44	41.23	105.4	100.1	102.5	106.1	99.2	99	97.7	90.1
P23764	Gpx3	Glutathione peroxidase 3 OS=Rattus norvegicus OX=10116 GN=Gpx3 PE=2 SV=2	35	7	22	7	226	25.4	8.12	44.84	105.6	106.6	105.6	105.7	95	94	94.5	93
Q4KM73	Cmpk1	UMP-CMP kinase OS=Rattus norvegicus OX=10116 GN=Cmpk1 PE=1 SV=2	38	7	17	7	196	22.2	5.83	34.55	102.5	98.6	99.4	103.2	99.2	99.5	100.9	96.7
D3ZSA9	Nomo1	Nodal modulator 1 OS=Rattus norvegicus OX=10116 GN=Nomo1 PE=1 SV=1	12	12	14	12	1214	133.4	6.07	27.87	97.8	100.4	103.1	102.4	99.5	96	96.7	104.1
D3ZFQ8	Cyc1	Cytochrome c-1 OS=Rattus norvegicus OX=10116 GN=Cyc1 PE=1 SV=3	25	5	17	5	326	35.4	9.26	32.69	99.9	107	101.4	98.5	97.6	102.4	96.1	97.1
A0A0G2JWD6	Ap3b1	AP-3 complex subunit beta OS=Rattus norvegicus OX=10116 GN=Ap3b1 PE=1 SV=1	16	14	15	14	1096	121.4	6	29.42	102.7	98.6	99.9	100.8	101.5	99.9	97.9	98.7
Q6P736	Ptbp1	Polypyrimidine tract binding protein 1, isoform CRA_a OS=Rattus norvegicus OX=10116 GN=Ptbp1 PE=1 SV=1	25	8	15	6	556	59.3	9.16	30.01	93.2	92.2	94.7	95.6	107.8	105.5	106.4	104.7
G3V7T6	Sf3b1	Splicing factor 3b, subunit 1 OS=Rattus norvegicus OX=10116 GN=Sf3b1 PE=1 SV=1	12	11	18	11	1304	145.7	7.09	30.3	96.8	97.4	97	95.8	103.8	101.3	102.5	105.3
F1LU12	RGD1564865	Similar to 20-alpha-hydroxysteroid dehydrogenase OS=Rattus norvegicus OX=10116 GN=RGD1564865 PE=1 SV=2	31	8	15	5	295	33.8	7.46	32.45	102.2	103.5	101.5	105.4	97.5	97	97.5	95.4
P08010	Gstm2	Glutathione S-transferase Mu 2 OS=Rattus norvegicus OX=10116 GN=Gstm2 PE=1 SV=2	48	10	19	7	218	25.7	7.39	38.81	105.1	99.7	97.2	97.6	98.9	103.3	100.9	97.3
P62193	Psmc1	26S proteasome regulatory subunit 4 OS=Rattus norvegicus OX=10116 GN=Psmc1 PE=1 SV=1	24	9	15	8	440	49.2	6.21	31.09	97.6	93.5	93.1	95	101.3	104.2	106	109.3
D3ZC55	Hspa12a	Heat shock 70kDa protein 12A (Predicted), isoform CRA_a OS=Rattus norvegicus OX=10116 GN=Hspa12a PE=1 SV=1	19	11	18	10	675	74.8	6.61	31.62	99.4	99	100.4	104.6	102	97.6	101.3	95.7
Q6AYU5	Pcbp2	Poly(rC)-binding protein 2 OS=Rattus norvegicus OX=10116 GN=Pcbp2 PE=1 SV=1	25	8	15	3	365	38.6	6.79	34.74	92.9	95.3	94	95.3	103.2	107.1	104	108.1
Q5U2S7	Psmd3	Proteasome (Prosome, macropain) 26S subunit, non-ATPase, 3 OS=Rattus norvegicus OX=10116 GN=Psmd3 PE=1 SV=1	22	10	17	10	530	60.7	8.44	24.16	92.7	96.3	93.7	100.4	103	108.5	104.1	101.2
D3ZZS8	Atp6v1b1	ATPase H+-transporting V1 subunit B1 OS=Rattus norvegicus OX=10116 GN=Atp6v1b1 PE=3 SV=2	18	9	19	3	611	67.2	5.4	35.33	111.4	102	108.9	107.6	92	89.8	93.8	94.5
D3ZUM4	Glb1	Beta-galactosidase OS=Rattus norvegicus OX=10116 GN=Glb1 PE=1 SV=1	13	7	18	7	647	73.2	7.49	39.53	93.9	90.3	93.5	92	106.1	108.6	107.8	107.7
B5DEY8	Snx6	Sorting nexin OS=Rattus norvegicus OX=10116 GN=Snx6 PE=1 SV=1	23	10	15	9	406	46.6	6.16	32.83	95.7	137.4	108	92.3	94.4	91.7	90.3	90.2
P08753	Gnai3	Guanine nucleotide-binding protein G(k) subunit alpha OS=Rattus norvegicus OX=10116 GN=Gnai3 PE=1 SV=3	31	9	17	4	354	40.5	5.69	30.61	96.8	97.2	95.4	97.7	104	100.4	104	104.4
P24473	Gstk1	Glutathione S-transferase kappa 1 OS=Rattus norvegicus OX=10116 GN=Gstk1 PE=1 SV=3	40	7	14	7	226	25.5	9.07	35.95	101	110.2	106.2	100.6	96.2	96.5	94.4	94.9
G3V667	Itga6	Integrin subunit alpha 6 OS=Rattus norvegicus OX=10116 GN=Itga6 PE=1 SV=1	13	12	15	12	1073	119.4	7.06	33.2	97.7	101.4	99.1	93.7	100.6	100.7	103.5	103.2
B2RYP4	Snx2	Sorting nexin 2 OS=Rattus norvegicus OX=10116 GN=Snx2 PE=1 SV=1	21	11	17	10	519	58.5	5.12	36.87	101	97.5	98.6	98.3	101.5	101.1	100.8	101.4
Q5XIF3	Ndufs4	NADH dehydrogenase [ubiquinone] iron-sulfur protein 4, mitochondrial OS=Rattus norvegicus OX=10116 GN=Ndufs4 PE=1 SV=1	31	5	12	5	175	19.7	10.14	26.87	99.1	104.6	101.3	102.8	100.4	96.4	98.3	97.1
B1WC34	Prkcsh	Protein kinase C substrate 80K-H OS=Rattus norvegicus OX=10116 GN=Prkcsh PE=1 SV=1	15	9	30	9	525	59.2	4.48	53.09	100.8	99.1	100.6	96.9	102.5	98.7	102	99.4
Q9Z270	Vapa	Vesicle-associated membrane protein-associated protein A OS=Rattus norvegicus OX=10116 GN=Vapa PE=1 SV=3	30	7	20	6	249	27.8	8.4	33.37	98.2	97.9	98.1	96	102.2	103	102.4	102.1
Q6P503	Atp6v1d	ATPase H+-transporting V1 subunit D OS=Rattus norvegicus OX=10116 GN=Atp6v1d PE=1 SV=1	42	7	16	7	247	28.3	9.45	40.31	111.8	100.6	101.1	100.8	96.4	96.9	97	95.4
Q68FR9	Eef1d	Elongation factor 1-delta OS=Rattus norvegicus OX=10116 GN=Eef1d PE=1 SV=2	26	5	15	4	281	31.3	5.06	37.79	93.9	93.3	93.7	98.1	104.2	104.1	108.1	104.7
A0A0G2K9F9	Coro7	Coronin OS=Rattus norvegicus OX=10116 GN=Coro7 PE=1 SV=1	15	10	14	10	923	101.2	6.48	28.26	102.5	103.9	104.8	97	99.4	95.6	99	98
A0A0H2UI21	Crat	Carnitine O-acetyltransferase OS=Rattus norvegicus OX=10116 GN=Crat PE=1 SV=1	16	10	17	10	626	71	8.21	34.48	103.8	102.9	103.2	105.9	96.2	95.3	98.6	94
Q6PDV7	Rpl10	60S ribosomal protein L10 OS=Rattus norvegicus OX=10116 GN=Rpl10 PE=1 SV=3	48	9	28	9	214	24.6	10.08	56.33	99.3	95.8	96.8	95.2	104.6	101.5	102.3	104.4
P07483	Fabp3	Fatty acid-binding protein, heart OS=Rattus norvegicus OX=10116 GN=Fabp3 PE=1 SV=2	53	7	19	7	133	14.8	6.33	39.33	100.9	102.3	105.7	105.2	98.8	96	94.5	96.5
Q63525	Nudc	Nuclear migration protein nudC OS=Rattus norvegicus OX=10116 GN=Nudc PE=1 SV=1	30	10	15	10	332	38.4	5.38	32.18	99.3	96.5	98.4	95.5	103.8	102.1	101.7	102.8
A0A0G2JSY3	Nln	Neurolysin (Metallopeptidase M3 family), isoform CRA_a OS=Rattus norvegicus OX=10116 GN=Nln PE=1 SV=1	18	11	16	10	704	80.2	6.47	34.53	97.2	98.6	95.8	98.1	101.5	102.6	104.4	101.8
Q5I0D1	Glod4	Glyoxalase domain-containing protein 4 OS=Rattus norvegicus OX=10116 GN=Glod4 PE=1 SV=1	30	9	14	9	298	33.2	5.27	39.35	99.1	101.3	100.6	99.4	100.9	98.2	99.3	101.2
Q6AXV4	Samm50	Sorting and assembly machinery component 50 homolog OS=Rattus norvegicus OX=10116 GN=Samm50 PE=1 SV=1	26	10	18	10	469	51.9	6.8	34.31	103.8	103	111.4	102.7	95.2	95.2	96.1	92.4
D3ZIL6	Echdc2	Enoyl CoA hydratase domain-containing 2 OS=Rattus norvegicus OX=10116 GN=Echdc2 PE=1 SV=1	34	6	13	6	296	31.8	9.33	34.18	105.2	106.1	103	101.6	97	94.8	94.9	97.3
B3GNI6	Sept11	Septin-11 OS=Rattus norvegicus OX=10116 GN=Sept11 PE=1 SV=1	28	10	21	7	431	49.7	6.68	39.17	95.2	97	94.4	92	104.9	104	105	107.6
P60901	Psma6	Proteasome subunit alpha type-6 OS=Rattus norvegicus OX=10116 GN=Psma6 PE=1 SV=1	36	8	14	8	246	27.4	6.76	30.4	98.2	97.4	93.3	95.3	105.8	104.3	103.6	102
Q5XIE6	Hibch	3-hydroxyisobutyryl-CoA hydrolase, mitochondrial OS=Rattus norvegicus OX=10116 GN=Hibch PE=1 SV=2	27	9	12	9	385	43	8.46	25.62	98.6	103.9	101.7	99.3	98.9	95	100.5	102.1
Q6P7B0	Wars	Tryptophan--tRNA ligase, cytoplasmic OS=Rattus norvegicus OX=10116 GN=Wars PE=1 SV=2	23	9	14	9	481	54.1	6.48	28.82	96.7	98.2	97.2	96.1	103.7	103.7	101.9	102.6
Q6P6T4	Eml2	Echinoderm microtubule-associated protein-like 2 OS=Rattus norvegicus OX=10116 GN=Eml2 PE=1 SV=1	15	8	14	8	649	70.7	6.3	31.2	102.8	94.9	95.8	98.4	100.6	100.7	101.4	105.5
P20760	Igg-2a	Ig gamma-2A chain C region OS=Rattus norvegicus OX=10116 GN=Igg-2a PE=1 SV=1	35	8	16	7	322	35.2	7.68	25.75	95.8	100.1	99.7	95.6	100.4	102.4	102	104
Q4QQV4	Hars	Dead end homolog 1 (Zebrafish) OS=Rattus norvegicus OX=10116 GN=Hars PE=1 SV=1	25	12	16	12	508	57.3	6.11	36.3	104.9	100.1	100.1	93.9	99.1	100.2	100.3	101.5
D3ZUC9	Oxsr1	Oxidative-stress responsive 1 (Predicted) OS=Rattus norvegicus OX=10116 GN=Oxsr1 PE=1 SV=1	19	8	11	6	527	58.2	6.57	30.99	103.8	99	99.3	98.4	100.5	100.2	101.6	97.1
P63088	Ppp1cc	Serine/threonine-protein phosphatase PP1-gamma catalytic subunit OS=Rattus norvegicus OX=10116 GN=Ppp1cc PE=1 SV=1	34	8	17	2	323	37	6.54	22.78	103.7	102.4	102.4	96.1	106.1	91.1	97.5	100.5
P20069	Pmpca	Mitochondrial-processing peptidase subunit alpha OS=Rattus norvegicus OX=10116 GN=Pmpca PE=1 SV=1	24	10	18	10	524	58.6	8.09	33.75	102	102.9	103	103.5	99.7	98	93.3	97.6
P35559	Ide	Insulin-degrading enzyme OS=Rattus norvegicus OX=10116 GN=Ide PE=1 SV=1	15	14	16	14	1019	117.6	6.61	33.23	102.4	100.7	98.2	100	98.2	101.2	101.5	97.7
F1M3L7	Eps8	Epidermal growth factor receptor kinase substrate 8 OS=Rattus norvegicus OX=10116 GN=Eps8 PE=1 SV=2	18	10	15	10	822	91.9	7.62	18.97	98.7	95.8	102.8	98.6	100.9	102	101.9	99.4
Q04462	Vars	Valine--tRNA ligase OS=Rattus norvegicus OX=10116 GN=Vars PE=2 SV=2	14	14	16	14	1264	140.3	7.61	26.1	98	97.5	100.6	95.9	103.5	99.9	100.7	103.9
F1LSP9	Fggy	FGGY carbohydrate kinase domain-containing OS=Rattus norvegicus OX=10116 GN=Fggy PE=1 SV=1	22	9	15	9	552	60.2	6.44	28.84	101.5	98.5	101.8	95.8	103	99.1	98.4	101.9
A0A0G2JSM7	Add1	Adducin 1 (Alpha), isoform CRA_b OS=Rattus norvegicus OX=10116 GN=Add1 PE=1 SV=1	18	9	15	9	735	80.3	6.15	30.65	99.8	102.8	100.9	97.5	99.3	98.8	100	100.9
F1M3H8	LOC681410	Hypothetical protein LOC681410 OS=Rattus norvegicus OX=10116 GN=LOC681410 PE=1 SV=3	28	7	18	5	301	30.1	9.32	39.2	91.9	95.5	99.8	90	107.7	108.1	102	105
Q6P747	Hp1bp3	Heterochromatin protein 1-binding protein 3 OS=Rattus norvegicus OX=10116 GN=Hp1bp3 PE=1 SV=1	15	9	21	9	553	60.8	9.67	36.83	96.5	95.5	98.8	97.4	103.3	104	102.4	102.1
Q4KMA2	Rad23b	UV excision repair protein RAD23 homolog B OS=Rattus norvegicus OX=10116 GN=Rad23b PE=1 SV=1	18	8	14	7	415	43.5	4.83	29.79	99.5	97.1	98	98.7	102.6	100.6	99.9	103.6
A0A0H2UI38	Rps19l2	Ribosomal protein S19 OS=Rattus norvegicus OX=10116 GN=Rps19l2 PE=4 SV=1	36	7	23	7	157	17.4	10.62	54.93	97.1	94	95	94.8	104.6	104.5	105.6	104.4
O55096	Dpp3	Dipeptidyl peptidase 3 OS=Rattus norvegicus OX=10116 GN=Dpp3 PE=1 SV=2	16	11	19	11	738	83	5.22	41.7	98.7	95.7	92	97.7	105.3	103.9	102.6	104.2
F1LMI6	Slc5a2	Sodium/glucose cotransporter 2 OS=Rattus norvegicus OX=10116 GN=Slc5a2 PE=3 SV=1	15	8	15	8	670	73	7.47	35.72	100	102.8	99.4	99.2	98	102.3	99.1	99.3
Q3KRE0	Atad3	ATPase family AAA domain-containing protein 3 OS=Rattus norvegicus OX=10116 GN=Atad3 PE=1 SV=1	19	10	16	10	591	66.7	9.29	35.5	105.1	103.9	107.9	98.5	99.1	94.6	94.3	96.7
D3ZMS1	Sf3b2	Splicing factor 3b, subunit 2 OS=Rattus norvegicus OX=10116 GN=Sf3b2 PE=1 SV=3	17	12	16	12	878	98.1	5.62	18.91	98.1	94.6	98.7	97	106.1	102	103.9	99.6
O70377	Snap23	Synaptosomal-associated protein 23 OS=Rattus norvegicus OX=10116 GN=Snap23 PE=1 SV=1	50	8	13	8	210	23.2	4.93	32.33	100.4	98.3	99.2	96.3	102.2	101	102.1	100.5
Q91ZN1	Coro1a	Coronin-1A OS=Rattus norvegicus OX=10116 GN=Coro1a PE=1 SV=3	23	10	18	10	461	51	6.48	42.7	93	93.9	92.5	91.3	106.5	106.6	107.6	108.6
A0A0G2JWC7	Fermt2	Fermitin family member 2 OS=Rattus norvegicus OX=10116 GN=Fermt2 PE=1 SV=1	20	12	19	11	695	79.6	6.92	23.51	95.4	96.2	97.5	97	103.3	104.1	104.2	102.4
F1M1H0	Dera	Deoxyribose-phosphate aldolase OS=Rattus norvegicus OX=10116 GN=Dera PE=1 SV=3	47	12	15	12	318	35.1	8.59	28.72	100.8	97.3	105.7	102.7	98.9	98.3	99.8	96.6
Q80ZA3	Serpinf1	Alpha-2 antiplasmin OS=Rattus norvegicus OX=10116 GN=Serpinf1 PE=1 SV=1	32	9	12	9	418	46.4	6.47	32.65	104.7	102.1	100.3	96.8	100	96.5	99.9	99.6
A0A0G2JSP9	Slc22a2	RCG44898, isoform CRA_a OS=Rattus norvegicus OX=10116 GN=Slc22a2 PE=4 SV=1	12	7	14	2	593	66	7.97	33.82	107	108.3	110.7	111.2	89.9	89.6	91.4	92
Q64611	Csad	Cysteine sulfinic acid decarboxylase OS=Rattus norvegicus OX=10116 GN=Csad PE=1 SV=1	23	10	14	10	493	55.2	7.24	33.74	114.1	112.7	115.2	108.9	91.3	86.4	84.4	86.9
P05712	Rab2a	Ras-related protein Rab-2A OS=Rattus norvegicus OX=10116 GN=Rab2a PE=2 SV=1	30	6	14	6	212	23.5	6.54	43.34	99.1	98.2	99.2	98.6	101.2	101.3	101.8	100.5
G3V9U0	Acss2	Acyl-CoA synthetase short-chain family member 2 OS=Rattus norvegicus OX=10116 GN=Acss2 PE=1 SV=1	23	12	14	12	701	78.8	6.64	31.47	100	99.3	100.5	103.4	96.1	101.9	100.1	98.7
F1LNT1	Itpr1	Inositol 1,4,5-trisphosphate receptor type 1 OS=Rattus norvegicus OX=10116 GN=Itpr1 PE=1 SV=3	6	16	17	13	2773	315.6	6.1	30.75	104.7	98.7	99.6	97.1	100.8	101.2	99.3	98.6
Q63150	Dpys	Dihydropyrimidinase OS=Rattus norvegicus OX=10116 GN=Dpys PE=1 SV=2	30	10	18	10	519	56.8	7.23	33.98	102.5	102.7	101.4	101.7	99.4	94.6	99.5	98.3
P20761	Igh-1a	Ig gamma-2B chain C region OS=Rattus norvegicus OX=10116 GN=Igh-1a PE=1 SV=1	30	7	17	7	333	36.5	7.64	28.48	100	105.9	101.1	100.5	100.7	94.3	97.9	99.4
Q9Z1X1	Esyt1	Extended synaptotagmin-1 OS=Rattus norvegicus OX=10116 GN=Esyt1 PE=1 SV=1	13	10	14	10	1088	121.1	5.69	23.86	97.1	94.3	92.4	99.9	101.5	101.7	108.8	104.3
Q66SY1	Picalm	Clathrin-assembly lymphoid leukemia protein OS=Rattus norvegicus OX=10116 GN=Picalm PE=1 SV=1	19	8	13	1	610	66.2	8.81	35.29	93.9	96.1	102.6	96.4	96.2	108.2	117.7	88.9
A0A0H2UHV9	Copg2	Coatomer subunit gamma OS=Rattus norvegicus OX=10116 GN=Copg2 PE=1 SV=1	15	11	15	9	870	97.5	5.74	31.73	95.1	94.1	102.2	98.9	101.6	101	104.4	102.7
O35956	Slc22a6	Solute carrier family 22 member 6 OS=Rattus norvegicus OX=10116 GN=Slc22a6 PE=1 SV=1	12	7	21	7	551	60.7	9	45.4	109.7	107.9	113.6	107.8	91.8	90.7	87.8	90.6
A0A0G2K161	Epb41	Erythrocyte membrane protein band 4.1 OS=Rattus norvegicus OX=10116 GN=Epb41 PE=1 SV=1	12	9	15	7	866	96.8	5.45	31.86	101.1	101.4	106.3	101.4	96	99.5	97.5	96.9
M0R735	Syncrip	Heterogeneous nuclear ribonucleoprotein Q OS=Rattus norvegicus OX=10116 GN=Syncrip PE=1 SV=2	23	12	15	7	562	62.6	7.56	28.95	96.8	94	99.7	100.3	103.2	104.2	103.7	98.1
Q99N27	Snx1	Sorting nexin-1 OS=Rattus norvegicus OX=10116 GN=Snx1 PE=1 SV=1	17	8	15	7	522	59	5.22	35.32	94.8	98.1	97.1	102	104	100.2	104.5	99.4
D3ZLM5	Nhlrc2	NHL repeat containing 2 (Predicted) OS=Rattus norvegicus OX=10116 GN=Nhlrc2 PE=1 SV=1	25	12	15	12	725	78.5	5.49	27.48	104.4	99.1	100.8	96.2	99.8	100.5	100.5	98.6
G3V762	Tsta3	Tissue specific transplantation antigen P35B (Predicted), isoform CRA_a OS=Rattus norvegicus OX=10116 GN=Tsta3 PE=1 SV=1	27	6	11	6	321	35.8	6.74	24.68	111.9	94.3	97.5	96.2	98.1	101.1	100.3	100.6
Q9ESS6	Bcam	Basal cell adhesion molecule OS=Rattus norvegicus OX=10116 GN=Bcam PE=2 SV=1	21	10	14	10	624	67.5	5.78	32.83	95.8	99.1	97.2	99.2	98.7	103.2	101.3	105.5
B5DFN2	Ahcyl1	S-adenosylhomocysteine hydrolase-like protein 1 OS=Rattus norvegicus OX=10116 GN=Ahcyl1 PE=1 SV=2	20	9	17	1	483	53.7	7.44	38.41	100.6	109.2	100.3	101	105.5	93.9	105.3	84
A0A0G2K549	Aspdh	Putative L-aspartate dehydrogenase OS=Rattus norvegicus OX=10116 GN=Aspdh PE=1 SV=1	25	6	10	6	342	35.9	7.84	30.74	108.1	103.4	104	106.1	95.4	92.9	95.7	94.6
G3V8G5	Glg1	Golgi apparatus protein 1 OS=Rattus norvegicus OX=10116 GN=Glg1 PE=1 SV=1	12	9	16	9	1171	133.5	6.9	33.91	96.7	95	94.1	95.6	102.9	108.5	105.8	101.4
Q9JJ54	Hnrnpd	Heterogeneous nuclear ribonucleoprotein D0 OS=Rattus norvegicus OX=10116 GN=Hnrnpd PE=1 SV=2	25	9	15	8	353	38.2	7.81	29.33	94.8	90.7	92.9	92.8	109	106.7	103.6	109.4
O88321	Psmd4	Antisecretory factor OS=Rattus norvegicus OX=10116 GN=Psmd4 PE=1 SV=1	33	8	13	8	380	41	4.81	23.15	97.9	98.8	99.4	100	107.4	97.8	101.1	97.6
A0A0G2JTT2	Picalm	Phosphatidylinositol binding clathrin assembly protein, isoform CRA_a OS=Rattus norvegicus OX=10116 GN=Picalm PE=1 SV=1	17	8	13	1	655	71	8.37	32.34	93.1	92.7	93.2	93.7	106.7	107.3	104.3	109.1
A0A0G2JX93	Stat1	Signal transducer and activator of transcription OS=Rattus norvegicus OX=10116 GN=Stat1 PE=1 SV=1	11	9	12	9	1083	125.2	6.71	32.95	93.7	93.4	105.3	94.9	103.1	102.6	104.6	102.4
Q9QX81	Hnrnpab	Heterogeneous nuclear ribonucleoprotein A/B OS=Rattus norvegicus OX=10116 GN=Hnrnpab PE=1 SV=1	21	6	19	5	332	36.2	6.95	37.25	91.4	90.2	94	93.1	107.9	107.8	110	105.6
P02696	Rbp1	Retinol-binding protein 1 OS=Rattus norvegicus OX=10116 GN=Rbp1 PE=1 SV=2	56	9	18	9	135	15.8	5.25	35.11	92.4	96.5	94.4	103.8	117.2	97.6	98.8	99.1
Q5XFW8	Sec13	Protein SEC13 homolog OS=Rattus norvegicus OX=10116 GN=Sec13 PE=1 SV=1	31	7	15	7	322	35.5	5.38	24.67	98	101.6	99	98.7	100.9	104	99	98.8
B1WC26	Nans	N-acetylneuraminate synthase OS=Rattus norvegicus OX=10116 GN=Nans PE=1 SV=1	29	8	15	8	359	40	6.84	29.41	95.8	96.3	96.6	97.4	104.1	104.2	104.1	101.4
Q63798	Psme2	Proteasome activator complex subunit 2 OS=Rattus norvegicus OX=10116 GN=Psme2 PE=2 SV=3	45	8	14	8	238	26.8	5.72	23.51	98.4	94.3	97.5	97.4	104.1	105.7	102.1	100.5
Q499Q4	Pgm1	Phosphoglucomutase 1 OS=Rattus norvegicus OX=10116 GN=Pgm1 PE=1 SV=2	22	12	18	12	562	61.4	6.57	35.47	100.2	100.2	100.2	103.4	99.2	100.6	98.7	97.6
F7DLY1	Eps8l2	EPS8-like 2 OS=Rattus norvegicus OX=10116 GN=Eps8l2 PE=1 SV=2	15	7	9	7	729	82.2	7.2	25.25	97.5	96.2	97.7	99.7	99.9	103	102.4	103.7
F1LMA7	Mrc2	C-type mannose receptor 2 OS=Rattus norvegicus OX=10116 GN=Mrc2 PE=1 SV=2	7	7	10	7	1514	170.5	6.3	20.81	98.8	93.7	97.6	90.9	107.8	101.7	103.6	105.8
Q4QQW3	Adhfe1	Hydroxyacid-oxoacid transhydrogenase, mitochondrial OS=Rattus norvegicus OX=10116 GN=Adhfe1 PE=1 SV=1	17	6	13	6	467	50.2	7.55	29.85	101.5	97.8	101.1	103.4	100.7	97.7	100.5	97.3
P04041	Gpx1	Glutathione peroxidase 1 OS=Rattus norvegicus OX=10116 GN=Gpx1 PE=1 SV=4	57	8	19	8	201	22.3	7.87	49.1	104.4	106.2	110.5	106	96.8	91.9	93.6	90.6
Q3T1L0	Aldh16a1	Aldehyde dehydrogenase family 16 member A1 OS=Rattus norvegicus OX=10116 GN=Aldh16a1 PE=2 SV=1	16	11	17	11	802	85.4	6.15	30.81	101.9	101.3	98.6	98.7	98.9	97.6	100.1	102.7
P06757	Adh1	Alcohol dehydrogenase 1 OS=Rattus norvegicus OX=10116 GN=Adh1 PE=1 SV=3	23	9	21	9	376	39.6	8.18	50.17	97.8	98.1	96.1	99.1	100.7	102.9	102.9	102.4
B0BMW0	Rab14	RAB14, member RAS oncogene family OS=Rattus norvegicus OX=10116 GN=Rab14 PE=1 SV=1	33	7	13	6	215	23.9	6.21	38.36	98.3	96.8	103.5	97.9	98.6	103.8	100	101
P23358	Rpl12	60S ribosomal protein L12 OS=Rattus norvegicus OX=10116 GN=Rpl12 PE=2 SV=1	50	6	15	6	165	17.8	9.42	33.39	96.5	92.8	95.7	95	104.4	104.5	104.3	106.8
G3V8M6	Folr1	Folate receptor 1 OS=Rattus norvegicus OX=10116 GN=Folr1 PE=4 SV=1	34	8	16	8	255	29.6	7.17	37.05	96.1	96.3	96.2	97.8	103.6	102.8	103.4	103.7
Q9R1T5	Aspa	Aspartoacylase OS=Rattus norvegicus OX=10116 GN=Aspa PE=1 SV=2	31	7	15	7	312	35.3	6.4	29.75	101.2	101.8	111.2	102	94.8	95.6	98.6	94.7
D3ZCF8	Abca8a	ATP-binding cassette, subfamily A (ABC1), member 8a OS=Rattus norvegicus OX=10116 GN=Abca8a PE=1 SV=3	8	9	12	9	1624	184.8	7.25	25.01	103.2	100.7	101.8	97.1	102.7	100.7	96.7	97.1
D4A3V2	Ndufa6	NADH dehydrogenase [ubiquinone] 1 alpha subcomplex subunit 6 OS=Rattus norvegicus OX=10116 GN=Ndufa6 PE=1 SV=1	45	5	19	5	130	15.2	10.15	40.55	105.8	106.3	102.1	101.3	99.3	94.5	94.7	96.1
P62083	Rps7	40S ribosomal protein S7 OS=Rattus norvegicus OX=10116 GN=Rps7 PE=1 SV=1	52	8	16	8	194	22.1	10.1	36.07	92.4	99	101.1	97.2	106.2	100.6	104.5	99.1
O35303	Dnm1l	Dynamin-1-like protein OS=Rattus norvegicus OX=10116 GN=Dnm1l PE=1 SV=1	20	10	12	10	755	83.9	7.08	25.17	96.4	101.1	102.1	96.4	100	105.9	96.8	101.3
G3V9R2	Cfh	Complement factor H OS=Rattus norvegicus OX=10116 GN=Cfh PE=1 SV=1	14	11	16	11	1235	140.1	6.77	17.6	95.7	100.8	100.1	99.4	99.5	101.1	100.9	102.4
Q66HG6	Ca5b	Carbonic anhydrase 5B, mitochondrial OS=Rattus norvegicus OX=10116 GN=Ca5b PE=2 SV=1	28	8	15	8	317	36.6	7.15	31.62	99.6	99.6	102.5	98.6	101.1	98	100.3	100.4
C9WPN6	Eif2s3y	Eukaryotic translation initiation factor 2 subunit 3, Y-linked OS=Rattus norvegicus OX=10116 GN=Eif2s3y PE=2 SV=2	22	8	14	2	472	51.1	8.4	27.18	98.5	104.3	95.9	91.3	103.6	106.8	102.2	97.5
Q66HA6	Arl8b	ADP-ribosylation factor-like protein 8B OS=Rattus norvegicus OX=10116 GN=Arl8b PE=2 SV=1	37	6	11	6	186	21.5	8.43	30.13	97.4	97.2	94.5	99.6	102.9	101.8	103	103.5
Q5FVI6	Atp6v1c1	V-type proton ATPase subunit C 1 OS=Rattus norvegicus OX=10116 GN=Atp6v1c1 PE=2 SV=1	33	13	16	12	382	43.9	7.46	34.58	102	98.6	100.2	105.1	100.6	95.7	101.8	96
A0A0G2KBC7	Pfkm	ATP-dependent 6-phosphofructokinase OS=Rattus norvegicus OX=10116 GN=Pfkm PE=1 SV=1	17	11	13	10	851	93.5	7.42	31.5	103.9	105.5	102.9	99.6	99.8	99.8	96.1	92.5
F7FJQ3	Npc2	NPC intracellular cholesterol transporter 2 OS=Rattus norvegicus OX=10116 GN=Npc2 PE=1 SV=1	34	8	16	8	152	16.7	7.93	36.89	99.4	96.6	98.2	98.4	100.5	103.2	101.9	101.8
B0BNC9		Quinone oxidoreductase-like protein 2 OS=Rattus norvegicus OX=10116 PE=2 SV=1	19	5	12	5	350	37.5	8.69	37	102.5	103.3	108.9	100.5	94.7	98.1	96.4	95.5
D3ZPY8	Akr1c13	Aldo-keto reductase family 1, member C13 OS=Rattus norvegicus OX=10116 GN=Akr1c13 PE=1 SV=1	26	10	20	2	323	36.9	7.39	36.41	101.4	112.8	107	106.2	92.7	97.7	94.4	87.8
P54921	Napa	Alpha-soluble NSF attachment protein OS=Rattus norvegicus OX=10116 GN=Napa PE=1 SV=2	37	7	14	7	295	33.2	5.45	24.47	100.2	93.6	102.4	101.3	101.5	103	101.4	96.5
Q5U211	Snx3	Sorting nexin-3 OS=Rattus norvegicus OX=10116 GN=Snx3 PE=1 SV=1	43	8	15	6	162	18.8	8.66	37.33	102	100.7	103.6	100.4	100.2	97.3	98.7	97.2
P62142	Ppp1cb	Serine/threonine-protein phosphatase PP1-beta catalytic subunit OS=Rattus norvegicus OX=10116 GN=Ppp1cb PE=1 SV=3	31	7	17	2	327	37.2	6.19	25.04	94.1	105.4	99.7	101.6	97.1	106.4	99.6	96.1
Q9Z0J5	Txnrd2	Thioredoxin reductase 2, mitochondrial OS=Rattus norvegicus OX=10116 GN=Txnrd2 PE=1 SV=3	25	8	11	8	526	56.5	8.56	19.72	102.3	106.4	99.6	100.8	95.9	100.3	94.4	100.2
A0A0G2JYB1	Capzb	F-actin-capping protein subunit beta OS=Rattus norvegicus OX=10116 GN=Capzb PE=1 SV=1	32	8	17	8	296	33.4	5.49	30.85	91.7	96.1	93.3	94.2	104.5	104.2	107.2	108.8
G3V640	Timm44	Mitochondrial import inner membrane translocase subunit TIM44 OS=Rattus norvegicus OX=10116 GN=Timm44 PE=1 SV=1	24	11	14	11	453	51	8.31	25.72	104.1	95	96.7	101.6	99	101.6	103.2	98.8
A0A0G2K6U1	Nsf	Vesicle-fusing ATPase OS=Rattus norvegicus OX=10116 GN=Nsf PE=1 SV=1	18	13	16	13	744	82.6	6.95	28.78	99.6	97.8	101.5	96.9	101.4	102.4	100	100.5
Q6AY09	Hnrnph2	Heterogeneous nuclear ribonucleoprotein H2 OS=Rattus norvegicus OX=10116 GN=Hnrnph2 PE=1 SV=1	24	7	11	3	449	49.3	6.3	21.14	91.4	90.3	96.9	92.8	105.2	104.7	111.1	107.8
Q2PQA9	Kif5b	Kinesin-1 heavy chain OS=Rattus norvegicus OX=10116 GN=Kif5b PE=1 SV=1	17	13	15	13	963	109.5	6.44	16.44	96.9	96.2	97.4	99.9	99.8	102.2	101.7	105.9
Q03248	Upb1	Beta-ureidopropionase OS=Rattus norvegicus OX=10116 GN=Upb1 PE=1 SV=1	19	9	12	9	393	44	6.93	27.58	103.4	100.3	99.7	97.1	95.4	100.3	101.9	102
Q68FS8	Rtca	RNA 3'-terminal phosphate cyclase OS=Rattus norvegicus OX=10116 GN=Rtca PE=1 SV=1	28	8	11	8	366	39.3	7.66	27.08	96.7	98.2	97.9	92.3	104.8	102	103.5	104.7
Q64680	Cyp2d4	Cytochrome P450 2D4 OS=Rattus norvegicus OX=10116 GN=Cyp2d4 PE=2 SV=1	19	8	13	2	500	56.6	7.69	32.83	103.6	107.1	109.9	101.3	93	99.7	91.1	94.2
P68101	Eif2s1	Eukaryotic translation initiation factor 2 subunit 1 OS=Rattus norvegicus OX=10116 GN=Eif2s1 PE=1 SV=2	27	7	13	7	315	36.1	5.08	27.3	96.3	98.1	94.2	97.8	103	100.8	105.2	104.5
B2GUV7	Eif5b	Eukaryotic translation initiation factor 5B OS=Rattus norvegicus OX=10116 GN=Eif5b PE=1 SV=1	14	11	12	11	1216	137.6	5.57	22.63	98.1	98.7	98.6	101.3	102.6	100.4	101.8	98.5
Q6PDW1	Rps12	40S ribosomal protein S12 OS=Rattus norvegicus OX=10116 GN=Rps12 PE=1 SV=1	48	7	16	7	132	14.5	7.21	35.62	93.2	94	92.5	95.4	105	106.1	106.8	107.1
Q5I0M2	Qprt	Nicotinate-nucleotide pyrophosphorylase [carboxylating] OS=Rattus norvegicus OX=10116 GN=Qprt PE=2 SV=1	37	7	12	7	299	31.3	6.42	28.36	98.9	99.7	98.7	102.9	99.5	97.4	99.7	103
Q641Y0	Ddost	Dolichyl-diphosphooligosaccharide--protein glycosyltransferase 48 kDa subunit OS=Rattus norvegicus OX=10116 GN=Ddost PE=2 SV=1	21	7	15	7	441	48.9	5.97	37.15	95.7	101.1	97.5	94.7	102.4	102	104.5	102.1
B2RYG6	Otub1	Ubiquitin thioesterase OTUB1 OS=Rattus norvegicus OX=10116 GN=Otub1 PE=1 SV=1	26	5	16	5	271	31.3	4.94	39.81	97.4	96.4	100.9	98.2	100.6	101	102.9	102.7
Q5M7W5	Map4	Microtubule-associated protein 4 OS=Rattus norvegicus OX=10116 GN=Map4 PE=1 SV=1	16	12	15	12	1057	110.2	4.73	20.47	88.4	96.7	91.4	98.4	109.3	105.9	106.2	103.6
B0BN81	Rps5	40S ribosomal protein S5 OS=Rattus norvegicus OX=10116 GN=Rps5 PE=1 SV=1	26	5	15	5	204	22.9	9.72	50.42	95	98.8	93.5	95.7	101.7	111.7	101.8	101.7
A0A0G2K2B6	Tpmt	Thiopurine S-methyltransferase OS=Rattus norvegicus OX=10116 GN=Tpmt PE=1 SV=1	30	8	15	8	259	30.3	7.33	27.99	98.8	104.3	101.8	105.1	99.7	97.3	96.1	96.9
D3ZH41	Ckap4	Cytoskeleton-associated protein 4 OS=Rattus norvegicus OX=10116 GN=Ckap4 PE=1 SV=2	33	10	14	10	326	36.3	4.82	34.96	94.8	96.1	96.1	91	102.2	106	107.8	106.1
Q4FZT9	Psmd2	26S proteasome non-ATPase regulatory subunit 2 OS=Rattus norvegicus OX=10116 GN=Psmd2 PE=1 SV=1	12	10	16	10	908	100.1	5.2	23.85	95.8	99.7	111.3	95.4	97.4	99.1	99.6	101.7
P63326	Rps10	40S ribosomal protein S10 OS=Rattus norvegicus OX=10116 GN=Rps10 PE=2 SV=1	42	8	16	7	165	18.9	10.15	36.58	96	94.1	95	97.3	104.4	105.8	101.1	106.4
Q4G075	Serpinb1a	Leukocyte elastase inhibitor A OS=Rattus norvegicus OX=10116 GN=Serpinb1a PE=1 SV=1	25	9	14	9	379	42.7	6.32	25.76	90.1	87.4	91	92.7	113	109.4	108.6	107.7
Q562C4	Mettl7b	Methyltransferase-like protein 7B OS=Rattus norvegicus OX=10116 GN=Mettl7b PE=1 SV=1	35	7	15	7	244	27.9	8.28	36.8	116.9	99.3	100.4	97	95.8	95.9	97.7	97
P62832	Rpl23	60S ribosomal protein L23 OS=Rattus norvegicus OX=10116 GN=Rpl23 PE=2 SV=1	49	6	18	6	140	14.9	10.51	42.32	96.3	97.8	96.4	99.7	102.8	99.4	103.6	104
B0BNN3	Ca1	Carbonic anhydrase 1 OS=Rattus norvegicus OX=10116 GN=Ca1 PE=1 SV=1	26	5	14	5	261	28.3	7.42	35.46	122.9	117.1	117.6	117.9	83.3	80.2	80.7	80.3
P24155	Thop1	Thimet oligopeptidase OS=Rattus norvegicus OX=10116 GN=Thop1 PE=1 SV=4	15	9	18	8	687	78.3	5.94	35.37	98.8	98.3	101.7	100.1	101.5	100.3	100.2	99.2
P32089	Slc25a1	Tricarboxylate transport protein, mitochondrial OS=Rattus norvegicus OX=10116 GN=Slc25a1 PE=1 SV=1	30	9	17	9	311	33.8	9.86	31	98.9	101	102.2	99.7	98.9	101.7	98.9	98.7
Q9EQP5	Prelp	Prolargin OS=Rattus norvegicus OX=10116 GN=Prelp PE=2 SV=1	23	9	16	9	377	43.2	9.45	40.43	92.5	95	97.3	90.2	106.7	107.6	105	105.8
A0A0G2K1L8	Basp1	Brain acid soluble protein 1 OS=Rattus norvegicus OX=10116 GN=Basp1 PE=1 SV=1	43	6	13	6	219	21.7	4.51	11.74	96.7	100.6	95.7	97	102.1	103.4	104.2	100.3
B0BN93	Psmd13	26S proteasome non-ATPase regulatory subunit 13 OS=Rattus norvegicus OX=10116 GN=Psmd13 PE=1 SV=1	29	10	13	10	376	42.8	5.83	26.33	96.6	94.5	98	95.4	101.4	101.5	101.5	111.1
A0A140TAI1	Ubqln1	Ubiquilin 1, isoform CRA_a OS=Rattus norvegicus OX=10116 GN=Ubqln1 PE=1 SV=1	17	7	9	3	582	62	4.94	23.34	102.9	109.4	104.2	100	89.5	93.5	95.4	105
G3V6R5	Suox	Sulfite oxidase OS=Rattus norvegicus OX=10116 GN=Suox PE=1 SV=1	19	8	11	8	546	60.8	6.8	29.04	123.3	104.2	103.1	99.8	96	88.7	92.4	92.6
P60123	Ruvbl1	RuvB-like 1 OS=Rattus norvegicus OX=10116 GN=Ruvbl1 PE=1 SV=1	21	8	12	8	456	50.2	6.42	23.48	96.5	92.9	99.1	94.5	105.4	103.9	104.2	103.4
A0A0G2K1M8	Prep	Prolyl endopeptidase OS=Rattus norvegicus OX=10116 GN=Prep PE=1 SV=1	21	11	13	11	709	80.4	5.87	23.47	99.8	96.5	99.5	97.1	101.3	101.2	101.1	103.5
Q5BJT9	Ckmt1	Creatine kinase U-type, mitochondrial OS=Rattus norvegicus OX=10116 GN=Ckmt1 PE=1 SV=1	25	7	13	7	418	46.9	8.32	31.62	104.9	99.1	95.3	101.1	96.5	100.5	100	102.6
Q8R431	Mgll	Monoglyceride lipase OS=Rattus norvegicus OX=10116 GN=Mgll PE=1 SV=1	23	6	14	6	303	33.5	7.37	37.26	105.5	109.2	104.4	107	93	94.7	92.2	94
D3ZAP9	Gpd1l	Glycerol-3-phosphate dehydrogenase [NAD(+)] OS=Rattus norvegicus OX=10116 GN=Gpd1l PE=1 SV=1	23	9	20	7	351	38	7.01	44.82	96.7	99.5	96.8	97.7	102.8	101.6	104	100.9
Q64542	Atp2b4	Plasma membrane calcium-transporting ATPase 4 OS=Rattus norvegicus OX=10116 GN=Atp2b4 PE=1 SV=1	9	8	13	5	1203	133	6.57	21.57	106.6	100	105.4	95.5	101.3	100.2	97.1	93.9
A0A0G2JYA4	LOC100362453	Serine/threonine-protein phosphatase OS=Rattus norvegicus OX=10116 GN=LOC100362453 PE=3 SV=1	36	8	10	2	309	35.5	5.43	25.26	97.7	96	93.5	97.1	100.6	103.1	103.4	108.5
G3V7I0	Prdx3	Peroxiredoxin 3 OS=Rattus norvegicus OX=10116 GN=Prdx3 PE=1 SV=1	32	6	13	6	257	28.3	7.55	44.17	97	98.9	101.3	102.8	101.2	100.4	99.7	98.6
Q6MGB5	Hsd17b8	Estradiol 17-beta-dehydrogenase 8 OS=Rattus norvegicus OX=10116 GN=Hsd17b8 PE=1 SV=1	35	6	11	6	259	26.8	6.55	30.95	103.7	110.4	116.3	98.7	90.7	91.5	96.5	92.1
Q7TSU1	Arfgef2	Brefeldin A-inhibited guanine nucleotide-exchange protein 2 OS=Rattus norvegicus OX=10116 GN=Arfgef2 PE=1 SV=1	9	13	13	8	1791	201.8	6.51	24.02	107.1	101.4	98.8	99	98.7	98.9	96.2	100
Q6AYS3	Ctsa	Carboxypeptidase OS=Rattus norvegicus OX=10116 GN=Ctsa PE=1 SV=1	15	6	17	6	456	51.2	5.24	30.74	98.1	99.3	102.7	97.1	98.1	107.1	99.6	97.9
P08289	Alpl	Alkaline phosphatase, tissue-nonspecific isozyme OS=Rattus norvegicus OX=10116 GN=Alpl PE=1 SV=2	24	9	19	9	524	57.6	6.92	34.65	110.3	103.5	113.4	103.9	94.6	91.3	92	90.8
C0KUC6	Lims1	LIM and senescent cell antigen-like-containing domain protein OS=Rattus norvegicus OX=10116 GN=Lims1 PE=1 SV=1	28	9	13	7	387	44.4	7.84	29.05	98.1	92.6	91.4	95.2	105.4	103.5	102.7	111.1
Q4KM74	Sec22b	Vesicle-trafficking protein SEC22b OS=Rattus norvegicus OX=10116 GN=Sec22b PE=1 SV=3	34	7	11	7	215	24.7	8.51	24.26	99.2	97.6	98.6	98.8	103.9	101.9	97.8	102.1
Q4KMA8	Erap1	Aminopeptidase OS=Rattus norvegicus OX=10116 GN=Erap1 PE=1 SV=1	11	9	12	9	930	106.4	6.51	23.37	96.9	91.8	94	93.9	113.5	101.3	104.3	104.3
Q63570	Psmc4	26S proteasome regulatory subunit 6B OS=Rattus norvegicus OX=10116 GN=Psmc4 PE=1 SV=1	24	10	15	9	418	47.4	5.21	21.81	116.2	102.6	102.1	94.3	96.3	97	94.2	97.2
Q6AXR6	Gsto1	Glutathione S-transferase omega 1, isoform CRA_b OS=Rattus norvegicus OX=10116 GN=Gsto1 PE=1 SV=1	38	8	14	8	241	27.7	7.01	30.46	97.1	97	96.1	102.1	101.2	100.7	103	102.7
A0A0G2K2C7	Usp9x	Ubiquitin-specific peptidase 9, X-linked OS=Rattus norvegicus OX=10116 GN=Usp9x PE=1 SV=1	6	12	13	12	2554	290	5.82	17.4	99.6	102.1	100.5	96.6	100.6	98.3	102.5	99.9
D3Z8L7	Rras	Ras-related protein R-Ras OS=Rattus norvegicus OX=10116 GN=Rras PE=1 SV=1	32	6	13	4	218	23.9	7.34	23.87	100.9	98.6	104.3	103.1	98.9	98.7	96.5	99.1
D4AA63	Ubqln2	Ubiquilin 2 OS=Rattus norvegicus OX=10116 GN=Ubqln2 PE=1 SV=1	15	7	9	3	638	67.2	5.22	25.75	98.9	110.1	105.7	96.1	97.5	96.5	97	98.2
Q921A4	Cygb	Cytoglobin OS=Rattus norvegicus OX=10116 GN=Cygb PE=1 SV=1	41	7	12	7	190	21.5	6.8	34.23	88.1	95.7	91.4	90.5	106.8	109.8	109.5	108.2
O54924	Exoc8	Exocyst complex component 8 OS=Rattus norvegicus OX=10116 GN=Exoc8 PE=1 SV=1	15	8	11	8	716	81	5.4	20.85	100.7	101.6	102.2	100.7	101.3	97.7	98.4	97.4
A0A0G2K0W9	Psma7	Proteasome subunit alpha type OS=Rattus norvegicus OX=10116 GN=Psma7 PE=1 SV=1	39	9	17	9	248	27.8	8.46	40.01	97.2	96.6	98.1	96.2	101.7	103.8	105	101.3
A0A0G2K2Q2	Gcat	Glycine C-acetyltransferase OS=Rattus norvegicus OX=10116 GN=Gcat PE=1 SV=1	25	6	12	6	416	45.2	7.65	24.57	102.7	102.6	101.9	97.1	100.4	103.7	95.5	96.1
Q91Y81	Sept2	Septin-2 OS=Rattus norvegicus OX=10116 GN=Sept2 PE=1 SV=1	29	7	13	7	361	41.6	6.6	33.91	96.4	96.6	96.5	96.3	104.1	102.8	104	103.3
P38983	Rpsa	40S ribosomal protein SA OS=Rattus norvegicus OX=10116 GN=Rpsa PE=1 SV=3	31	6	12	6	295	32.8	4.87	38.6	96	97.6	96.7	96.3	105	100.9	101.4	106.1
F1LM78	Rdh16	Retinol dehydrogenase 16 OS=Rattus norvegicus OX=10116 GN=Rdh16 PE=1 SV=1	21	7	18	7	317	35.6	8.65	38.4	106.1	114.7	112.6	104.4	88.6	92.1	88.8	92.6
A0A0G2JWX1	Psmd11	26S proteasome non-ATPase regulatory subunit 11 OS=Rattus norvegicus OX=10116 GN=Psmd11 PE=1 SV=1	14	6	12	6	500	55.9	7.91	23.72	98.4	96.5	100.7	98.8	99.9	101.3	102.6	101.9
Q5XIC6	Psmd12	Proteasome (Prosome, macropain) 26S subunit, non-ATPase, 12 OS=Rattus norvegicus OX=10116 GN=Psmd12 PE=1 SV=1	28	13	20	13	456	52.9	7.36	29.92	101.9	99.6	100	98.8	100.9	100.9	99.7	98.2
D4A5L9		Uncharacterized protein OS=Rattus norvegicus OX=10116 PE=3 SV=1	65	7	25	6	105	11.6	9.58	50.09	98.7	103.7	102.9	106	95.9	99.7	95.6	97.6
A0A0G2JW60	Utrn	Utrophin OS=Rattus norvegicus OX=10116 GN=Utrn PE=1 SV=1	5	13	14	13	3424	391.8	5.33	20.28	100.2	99.6	94.9	95.7	101.8	103	99.6	105.2
G3V6G7	Pnpt1	Polyribonucleotide nucleotidyltransferase 1 OS=Rattus norvegicus OX=10116 GN=Pnpt1 PE=1 SV=1	14	9	12	9	784	85.8	8.13	28.28	100.9	100.9	100.3	101.5	100.9	99.6	97.9	97.9
Q5M7T6	Atp6v0d1	V-type proton ATPase subunit OS=Rattus norvegicus OX=10116 GN=Atp6v0d1 PE=1 SV=1	21	5	11	5	351	40.3	5	24.11	99.7	100.9	99.8	106.1	97.1	97.1	96.1	103.2
Q5PQK2	Fus	FUS RNA-binding protein OS=Rattus norvegicus OX=10116 GN=Fus PE=1 SV=1	16	8	12	5	518	52.6	9.36	24.17	93.6	90.5	90.6	95.8	107	105.8	109.4	107.1
Q6IRS6	Fetub	Fetub protein OS=Rattus norvegicus OX=10116 GN=Fetub PE=1 SV=1	37	9	14	9	393	43.1	7.5	32.68	94.3	94.4	95.8	97.7	104.4	105.5	103.6	104.3
Q63083	Nucb1	Nucleobindin-1 OS=Rattus norvegicus OX=10116 GN=Nucb1 PE=1 SV=1	21	10	13	10	459	53.5	5.12	26.03	98.4	102	114	97.7	96.9	95.8	98.9	96.5
G3V804	Sfxn3	Sideroflexin OS=Rattus norvegicus OX=10116 GN=Sfxn3 PE=1 SV=1	26	7	11	6	321	35.4	9.69	29.48	98.1	101.6	98.3	93.9	104.5	101	98.5	104.1
Q3T1J1	Eif5a	Eukaryotic translation initiation factor 5A-1 OS=Rattus norvegicus OX=10116 GN=Eif5a PE=1 SV=3	55	8	17	8	154	16.8	5.24	39.24	99.6	97.7	96.1	101.8	99.7	103.1	100.2	101.8
Q3MIE0	Echdc3	Enoyl-CoA hydratase domain-containing protein 3, mitochondrial OS=Rattus norvegicus OX=10116 GN=Echdc3 PE=2 SV=1	32	8	11	8	300	32.4	8.57	23.08	92.1	94.8	95.5	92.7	103.5	107.9	105.8	107.7
Q4G061	Eif3b	Eukaryotic translation initiation factor 3 subunit B OS=Rattus norvegicus OX=10116 GN=Eif3b PE=1 SV=1	15	9	15	9	797	90.9	5.08	30.94	98	100	97.4	100.8	102.9	101.3	99	100.5
A0A0H2UHP9	Rab6a	RCG39700, isoform CRA_d OS=Rattus norvegicus OX=10116 GN=Rab6a PE=1 SV=1	38	7	13	6	208	23.5	5.54	27.29	95.9	93.8	93.7	98.8	102.7	103.8	106.9	104.4
Q32KJ5	Gns	N-acetylglucosamine-6-sulfatase OS=Rattus norvegicus OX=10116 GN=Gns PE=1 SV=1	15	8	12	8	544	60.9	7.72	24.58	98.7	100.8	98.1	96.2	98.5	102.2	103.2	102.3
B2GUZ5	Capza1	F-actin-capping protein subunit alpha-1 OS=Rattus norvegicus OX=10116 GN=Capza1 PE=1 SV=1	30	6	13	5	286	32.9	5.69	19.86	99.7	97.4	97.4	97.5	101.7	103.6	102.1	100.6
D4A0T0	Ndufb10	NADH:ubiquinone oxidoreductase subunit B10 OS=Rattus norvegicus OX=10116 GN=Ndufb10 PE=1 SV=1	39	7	22	7	176	20.8	7.69	44.53	97.2	98.1	99.2	102.9	99.8	100.8	103.8	98.3
B5DFK6	Ap3d1	Adaptor-related protein complex 3 subunit delta 1 OS=Rattus norvegicus OX=10116 GN=Ap3d1 PE=1 SV=1	11	9	11	9	1204	135.6	7.15	21.82	95.3	94.6	100.6	93.7	102.3	109.8	100.2	103.5
O35796	C1qbp	Complement component 1 Q subcomponent-binding protein, mitochondrial OS=Rattus norvegicus OX=10116 GN=C1qbp PE=1 SV=2	27	5	13	5	279	31	4.87	29.5	97.6	97.6	102.7	99.7	100.1	106.2	97.6	98.5
Q2V057	Prodh2	Hydroxyproline dehydrogenase OS=Rattus norvegicus OX=10116 GN=Prodh2 PE=2 SV=1	23	9	13	9	456	51	8.28	31.13	106.4	101.7	103.2	97	96.8	95.8	97.3	101.8
G3V8T5	Ruvbl2	RuvB-like helicase OS=Rattus norvegicus OX=10116 GN=Ruvbl2 PE=1 SV=1	18	8	11	8	463	51.1	5.64	25.25	93.9	98.9	108.9	95.7	101	98.2	100.3	103.1
M0R4N4	Dhrs7l1	Dehydrogenase/reductase (SDR family) member 7-like 1 OS=Rattus norvegicus OX=10116 GN=Dhrs7l1 PE=1 SV=2	24	7	14	7	324	36.4	6.96	28.88	118.6	104.6	102.7	102.7	92	89	98.1	92.3
G3V624	Coro1c	Coronin OS=Rattus norvegicus OX=10116 GN=Coro1c PE=1 SV=1	14	6	12	6	474	53.1	7.08	23.22	95.8	94.2	99.7	94.6	107.4	100.7	102.4	105.2
D3ZUX7	Acsf3	Acyl-CoA synthetase family member 3 OS=Rattus norvegicus OX=10116 GN=Acsf3 PE=1 SV=1	20	9	14	9	583	65.2	8.69	37.57	104.9	105.2	103.3	101.2	99	94.6	94.4	97.5
B2RZ78	Vps29	Vacuolar protein sorting-associated protein 29 OS=Rattus norvegicus OX=10116 GN=Vps29 PE=1 SV=2	37	5	14	1	182	20.5	6.79	37.31	112.9	115.4	106.7	84.9	92.4	106	80.9	100.7
Q9R0W2	Slc22a2	Solute carrier family 22 member 2 OS=Rattus norvegicus OX=10116 GN=Slc22a2 PE=1 SV=1	11	6	11	1	555	62.3	7.69	26.55	86.9	91	82.5	107.4	95.2	102.2	119.5	115.2
P10634	Cyp2d26	Cytochrome P450 2D26 OS=Rattus norvegicus OX=10116 GN=Cyp2d26 PE=1 SV=2	21	8	11	4	500	56.6	7.43	20.52	107.9	102.8	106.2	99.5	96.1	94.3	97.8	95.5
P36972	Aprt	Adenine phosphoribosyltransferase OS=Rattus norvegicus OX=10116 GN=Aprt PE=1 SV=1	48	7	15	7	180	19.5	6.57	35.89	90.5	93.2	92.8	96.4	105.1	107.6	104.8	109.5
P12368	Prkar2a	cAMP-dependent protein kinase type II-alpha regulatory subunit OS=Rattus norvegicus OX=10116 GN=Prkar2a PE=1 SV=4	16	5	10	5	401	45.5	4.93	22.98	105.1	99.7	97.9	98.4	99.1	104.5	96.6	98.7
P83732	Rpl24	60S ribosomal protein L24 OS=Rattus norvegicus OX=10116 GN=Rpl24 PE=2 SV=1	35	7	13	7	157	17.8	11.25	28.11	98.6	97.3	96.7	94.8	104.6	103.5	103.6	100.9
F1LTN6		Uncharacterized protein OS=Rattus norvegicus OX=10116 PE=1 SV=2	23	5	17	5	228	24.9	5.63	32.7	102.9	99.1	101	98.4	96.6	101.6	99	101.2
P20595	Gucy1b1	Guanylate cyclase soluble subunit beta-1 OS=Rattus norvegicus OX=10116 GN=Gucy1b1 PE=1 SV=2	15	7	10	7	619	70.4	5.4	20.62	93.7	84.4	90.2	94	110.7	108.3	110.4	108.3
G3V940	Coro1b	Coronin OS=Rattus norvegicus OX=10116 GN=Coro1b PE=1 SV=1	17	8	13	8	484	53.9	5.77	29.27	91.5	89.4	91	93.4	102	104.5	105.7	122.4
A0A0G2JSR7	Matr3	Matrin-3 OS=Rattus norvegicus OX=10116 GN=Matr3 PE=1 SV=1	12	8	13	8	845	94.4	6.25	22.63	95.3	97	98.4	99.9	101.4	103.7	103.7	100.5
A0A0G2K9Y7	LOC501233	Carboxylic ester hydrolase OS=Rattus norvegicus OX=10116 GN=LOC501233 PE=1 SV=1	12	6	22	1	544	59.8	5.69	48.52	117.6	102.3	99.5	100	92.2	95.3	98.7	94.5
M0RDK9	Acad8	Acyl-CoA dehydrogenase family, member 8 OS=Rattus norvegicus OX=10116 GN=Acad8 PE=1 SV=2	20	8	14	8	411	45.1	8.07	30.09	102.6	99.9	102.4	101	96.5	99.6	98.5	99.5
P54319	Plaa	Phospholipase A-2-activating protein OS=Rattus norvegicus OX=10116 GN=Plaa PE=1 SV=3	14	8	10	8	795	87	6.09	21.28	100.2	96.4	99.4	94.3	104.3	103.3	102	100.1
Q9Z2S9	Flot2	Flotillin-2 OS=Rattus norvegicus OX=10116 GN=Flot2 PE=1 SV=1	26	9	13	9	428	47	5.2	20.64	92.6	93.4	120	92.2	100.1	105.6	98.3	97.8
A0A0G2KAE5	Tinag	Tubulointerstitial nephritis antigen OS=Rattus norvegicus OX=10116 GN=Tinag PE=3 SV=1	23	7	12	7	431	49.1	7.44	25.13	101.1	103	99.6	99.3	96.8	106.2	101.1	92.8
P62828	Ran	GTP-binding nuclear protein Ran OS=Rattus norvegicus OX=10116 GN=Ran PE=1 SV=3	25	6	15	6	216	24.4	7.49	25.84	94	93.7	91.6	94.6	105.6	107.1	105.9	107.6
Q7TS56	Cbr4	Carbonyl reductase family member 4 OS=Rattus norvegicus OX=10116 GN=Cbr4 PE=2 SV=1	44	7	9	7	236	25.3	9.58	27.22	101.9	99.9	100.4	100.2	99.3	97.5	100.9	99.9
D4A4D5	LOC498555	Similar to 60S acidic ribosomal protein P2 OS=Rattus norvegicus OX=10116 GN=LOC498555 PE=3 SV=1	50	3	15	3	115	11.7	4.54	50.8	98.5	93.1	96.1	97.3	105.7	103.3	105.8	100.2
P40615	Dkc1	H/ACA ribonucleoprotein complex subunit DKC1 OS=Rattus norvegicus OX=10116 GN=Dkc1 PE=1 SV=4	25	9	13	9	509	56.6	9.38	25.04	93.4	95.3	94.8	95.8	108.4	101.6	105.8	105
D3Z900	Marc2	Mitochondrial amidoxime reducing component 2 OS=Rattus norvegicus OX=10116 GN=Marc2 PE=1 SV=2	19	7	16	5	338	38.2	8.68	26.11	99.7	97.3	101.1	98.2	101.2	99.5	100.9	102.1
Q6IRJ7	Anxa7	Annexin OS=Rattus norvegicus OX=10116 GN=Anxa7 PE=1 SV=1	22	10	15	10	463	50	6.18	30.96	93	92.8	93.4	93.4	105.9	105.5	106.9	109.1
Q920F5	Mlycd	Malonyl-CoA decarboxylase, mitochondrial OS=Rattus norvegicus OX=10116 GN=Mlycd PE=1 SV=1	24	9	10	9	492	54.7	8.72	24.8	110	102.7	106.9	100.2	96.5	92.4	97	94.2
Q32Q06	Ap1m1	AP-1 complex subunit mu-1 OS=Rattus norvegicus OX=10116 GN=Ap1m1 PE=1 SV=3	26	9	11	9	423	48.5	7.3	23.01	99.3	102.5	100.2	98.1	100.3	100	103.1	96.6
A0A140TAJ3	Fubp1	Far upstream element-binding protein 1 OS=Rattus norvegicus OX=10116 GN=Fubp1 PE=1 SV=1	13	8	15	6	642	67.5	7.61	28.91	94.4	96.5	99.5	94.5	102.6	105.7	104.8	102.1
D4A6C5	Arhgap1	Rho GTPase-activating protein 1 OS=Rattus norvegicus OX=10116 GN=Arhgap1 PE=1 SV=1	22	8	15	8	439	50.6	6.54	26.54	96.6	97.3	100.5	99.5	101.5	103	99.8	101.8
Q4KLK7	Nop56	NOP56 ribonucleoprotein OS=Rattus norvegicus OX=10116 GN=Nop56 PE=1 SV=1	14	7	11	7	588	65.4	9.01	26.3	98.3	95.8	97	95.2	105.7	103.6	102.6	101.8
D3ZLT1	Ndufb7	NADH dehydrogenase (Ubiquinone) 1 beta subcomplex, 7 (Predicted) OS=Rattus norvegicus OX=10116 GN=Ndufb7 PE=1 SV=1	54	5	24	5	137	16.6	8.46	47.77	100.2	100.6	101.4	100.8	99	99.2	102	96.8
D4A4K4	Vps13c	Vacuolar protein sorting 13 homolog C OS=Rattus norvegicus OX=10116 GN=Vps13c PE=1 SV=2	4	12	12	12	3739	418.4	6.84	19.66	96.4	94.8	98.2	98.3	107.6	100.8	102.5	101.3
D3ZCZ9	LOC100912599	NADH dehydrogenase [ubiquinone] iron-sulfur protein 6, mitochondrial OS=Rattus norvegicus OX=10116 GN=LOC100912599 PE=1 SV=1	43	3	9	3	116	13	9.22	21.61	106.1	102.9	103.9	96.5	95.4	100.3	97.8	97.1
F7FLB2	Pgm2	Pgm2 protein OS=Rattus norvegicus OX=10116 GN=Pgm2 PE=1 SV=2	14	8	13	8	620	69	6.34	23.71	93.8	95.2	96.4	95.7	104.5	104.7	103.3	106.3
B1WC49	Api5	Api5 protein OS=Rattus norvegicus OX=10116 GN=Api5 PE=1 SV=1	24	10	13	10	504	56.8	5.92	14.42	96.4	96.1	99.7	93.1	101.5	106.1	104.3	102.7
Q920D2	Dhfr	Dihydrofolate reductase OS=Rattus norvegicus OX=10116 GN=Dhfr PE=1 SV=3	62	10	17	10	187	21.6	7.33	27.5	96.3	99.1	100.4	98	101.4	99.4	102.7	102.7
Q5I0F0	Drg1	Developmentally-regulated GTP-binding protein 1 OS=Rattus norvegicus OX=10116 GN=Drg1 PE=1 SV=1	22	6	9	5	367	40.5	8.9	21.32	99.4	99.5	100.1	98.6	99	98.9	102	102.5
P17077	Rpl9	60S ribosomal protein L9 OS=Rattus norvegicus OX=10116 GN=Rpl9 PE=1 SV=1	33	6	11	6	192	21.9	9.95	21.12	95.4	93.8	97.5	97.2	101.2	110.5	104.2	100.3
D3ZGK7	Ces1c	Carboxylic ester hydrolase OS=Rattus norvegicus OX=10116 GN=Ces1c PE=1 SV=3	15	9	19	6	584	64.2	6.43	32.16	87.8	101.3	102.7	83	104.8	107.2	107.6	105.5
Q4QQT4	Ppp2r1b	Serine/threonine-protein phosphatase 2A 65 kDa regulatory subunit A beta isoform OS=Rattus norvegicus OX=10116 GN=Ppp2r1b PE=2 SV=1	16	9	12	3	601	66	5.1	28.88	93.4	93.7	118.6	96.8	97.3	95.8	101.8	102.5
P62914	Rpl11	60S ribosomal protein L11 OS=Rattus norvegicus OX=10116 GN=Rpl11 PE=1 SV=2	38	8	19	8	178	20.2	9.6	33.05	93.3	91.5	92.4	94.8	106.5	106.2	108	107.2
P06214	Alad	Delta-aminolevulinic acid dehydratase OS=Rattus norvegicus OX=10116 GN=Alad PE=1 SV=1	28	6	8	6	330	36	6.79	25.78	100	100.3	96.2	98.7	102.3	98.3	101.4	102.9
Q6QI16	Rtraf	LRRGT00192 OS=Rattus norvegicus OX=10116 GN=Rtraf PE=1 SV=1	26	6	10	6	296	33.8	8.63	24.45	93.2	94.1	99.5	99.6	107.5	99.8	101.5	104.7
D3ZD23	Abce1	ATP-binding cassette subfamily E member 1 OS=Rattus norvegicus OX=10116 GN=Abce1 PE=1 SV=1	18	10	11	10	599	67.3	8.34	27.23	98.1	97.9	102.3	98	102.6	100.1	100.2	100.9
A1L108	Arpc5l	Actin-related protein 2/3 complex subunit 5-like protein OS=Rattus norvegicus OX=10116 GN=Arpc5l PE=1 SV=2	55	6	11	6	153	17	6.8	28.23	99.7	103.9	99.1	96.3	103.4	98.5	99.4	99.7
Q5BJU0	Rras2	RAS-related 2 OS=Rattus norvegicus OX=10116 GN=Rras2 PE=1 SV=1	36	6	12	4	204	23.4	6.01	20.05	94.9	97.2	93.7	104.7	103.2	98.7	106.3	101.4
Q9QVC8	Fkbp4	Peptidyl-prolyl cis-trans isomerase FKBP4 OS=Rattus norvegicus OX=10116 GN=Fkbp4 PE=1 SV=3	20	8	11	8	458	51.4	5.62	24.63	126	94.4	91.7	91.6	99.3	99.6	99.9	97.7
Q6AYS8	Hsd17b11	Estradiol 17-beta-dehydrogenase 11 OS=Rattus norvegicus OX=10116 GN=Hsd17b11 PE=2 SV=1	32	6	11	6	298	32.9	8.63	17.43	101.4	94.4	94.9	94.7	104.1	104.1	103.8	102.6
Q5U2Q7	Etf1	Eukaryotic peptide chain release factor subunit 1 OS=Rattus norvegicus OX=10116 GN=Etf1 PE=2 SV=3	19	7	14	7	437	49	5.71	28.33	96.6	97.7	98.5	98.7	101.9	97.7	104.4	104.5
P85845	Fscn1	Fascin OS=Rattus norvegicus OX=10116 GN=Fscn1 PE=1 SV=2	25	10	13	10	493	54.5	6.74	32.87	89.3	93.2	101.4	92.7	105.5	106.6	105.4	105.8
M0RC65	Cfl2	Cofilin 2 OS=Rattus norvegicus OX=10116 GN=Cfl2 PE=1 SV=1	28	5	11	2	166	18.7	7.88	24.74	90.3	108	95.7	99.1	102.3	103.6	100.2	100.7
Q9QY17	Pacsin2	Protein kinase C and casein kinase substrate in neurons 2 protein OS=Rattus norvegicus OX=10116 GN=Pacsin2 PE=1 SV=2	16	8	17	8	488	55.9	5.14	24.01	100.7	100.5	97.6	102	105.2	97.7	96.4	99.9
G3V8G2	Psmd5	Proteasome (Prosome, macropain) 26S subunit, non-ATPase, 5 (Predicted), isoform CRA_a OS=Rattus norvegicus OX=10116 GN=Psmd5 PE=1 SV=1	21	8	12	8	504	55.8	5.27	30.33	94.8	94.3	96.4	95.4	101.3	105.1	107.8	104.9
P26453	Bsg	Basigin OS=Rattus norvegicus OX=10116 GN=Bsg PE=1 SV=2	14	4	11	4	388	42.4	5.4	28.21	100.4	111.2	103.3	97.7	94.6	101.3	88.5	102.9
P01015	Agt	Angiotensinogen OS=Rattus norvegicus OX=10116 GN=Agt PE=1 SV=1	19	7	10	7	477	51.9	5.57	19.5	97.5	94.2	104.5	94.5	102.3	102.4	105.1	99.6
Q4V8H8	Ehd2	EH domain-containing protein 2 OS=Rattus norvegicus OX=10116 GN=Ehd2 PE=1 SV=1	17	8	14	6	543	61.2	6.55	22.92	103.1	95.4	99.1	95.4	99.8	101.6	101.4	104.1
Q6PDU7	Atp5l	ATP synthase subunit g, mitochondrial OS=Rattus norvegicus OX=10116 GN=Atp5l PE=1 SV=2	49	4	23	4	103	11.4	9.58	41.87	101.6	106.5	102.5	102.2	95.7	102.6	96.2	92.7
A0A0U1RS25	Upf1	UPF1, RNA helicase and ATPase OS=Rattus norvegicus OX=10116 GN=Upf1 PE=1 SV=1	9	9	12	9	1124	123.9	6.61	17.49	94.9	94.8	96.6	94.7	106.6	105	103.1	104.3
B5DEJ5	Eefsec	Eefsec protein OS=Rattus norvegicus OX=10116 GN=Eefsec PE=1 SV=1	22	8	11	8	583	63.6	8.29	16.59	103.7	94.1	97.5	102.7	102	97.1	102.9	100.1
Q4QQS7	Umps	Uridine monophosphate synthetase OS=Rattus norvegicus OX=10116 GN=Umps PE=1 SV=1	19	8	10	8	481	52.3	6.48	28.76	99.9	100.6	99.8	98.2	99.8	97.6	102.3	101.8
Q64240	Ambp	Protein AMBP OS=Rattus norvegicus OX=10116 GN=Ambp PE=1 SV=1	25	8	16	8	349	38.8	6	35.3	96.5	95.6	104.3	92.7	102.2	102.2	102.9	103.6
P15178	Dars	Aspartate--tRNA ligase, cytoplasmic OS=Rattus norvegicus OX=10116 GN=Dars PE=1 SV=1	18	8	13	8	501	57.1	6.44	25.54	97.6	99.9	95.4	95.4	100.7	102.4	103.5	105.1
D4A8A0	Cad	Carbamoyl-phosphate synthetase 2, aspartate transcarbamylase, and dihydroorotase OS=Rattus norvegicus OX=10116 GN=Cad PE=1 SV=2	7	12	12	12	2224	243.2	6.54	18.38	98.6	93.7	100.4	93.1	96.6	102	103.8	111.7
B0BN63	Ahsa1	Activator of Hsp90 ATPase activity 1 OS=Rattus norvegicus OX=10116 GN=Ahsa1 PE=1 SV=1	22	5	10	5	338	38.1	5.53	24.75	101.2	99.7	98.8	95.6	98.9	102.4	99.1	104.3
M0RC77	Afmid	Kynurenine formamidase OS=Rattus norvegicus OX=10116 GN=Afmid PE=1 SV=1	29	6	9	6	306	34.3	5.99	22.87	97.6	118.1	100.1	97.7	100.3	92.4	96.7	97.1
Q5M963	Cmas	Cytidine monophosphate N-acetylneuraminic acid synthetase OS=Rattus norvegicus OX=10116 GN=Cmas PE=1 SV=1	23	9	13	9	432	48.1	8.22	25.18	96.3	94.6	96.4	96.2	102.6	103.6	104	106.3
A0A1W2Q6F8	Ndufa10l1	NADH dehydrogenase [ubiquinone] 1 alpha subcomplex subunit 10, mitochondrial OS=Rattus norvegicus OX=10116 GN=Ndufa10l1 PE=3 SV=1	28	8	11	8	355	40.5	7.53	20.82	100.4	108.4	105.5	103.7	94.6	98.8	96.1	92.6
P00173	Cyb5a	Cytochrome b5 OS=Rattus norvegicus OX=10116 GN=Cyb5a PE=1 SV=2	25	3	13	3	134	15.3	4.98	37.74	103.4	106.9	108.2	102.6	93.6	101.8	92.9	90.7
Q5I0M1	Apoh	Apolipoprotein H OS=Rattus norvegicus OX=10116 GN=Apoh PE=1 SV=1	20	6	15	6	345	38.4	8.21	33.33	101.4	98.9	101.9	98.7	101.6	99	99.3	99.3
I6L9G6	Tardbp	RCG31562, isoform CRA_c OS=Rattus norvegicus OX=10116 GN=Tardbp PE=1 SV=1	28	5	13	5	285	32.1	6.99	30.16	94.3	91.3	92.5	92.6	107.9	109.1	108	104.2
P20070	Cyb5r3	NADH-cytochrome b5 reductase 3 OS=Rattus norvegicus OX=10116 GN=Cyb5r3 PE=1 SV=2	15	3	10	3	301	34.2	8.38	28.8	97.6	98.6	96.5	97.2	103.6	103.4	101.8	101.3
F1LQ48	Hnrnpl	Heterogeneous nuclear ribonucleoprotein L OS=Rattus norvegicus OX=10116 GN=Hnrnpl PE=1 SV=2	16	9	14	9	623	67.9	8.47	28.51	93.2	96.4	92.7	92.1	103.7	105.2	106.9	109.8
D4AEP0	Adss	Adenylosuccinate synthetase isozyme 2 OS=Rattus norvegicus OX=10116 GN=Adss PE=1 SV=1	23	8	11	8	456	50.1	6.38	22.4	97.9	94.7	94.9	95.9	104.3	100.3	105.1	107
B5DEM5	Rpl14	60S ribosomal protein L14 OS=Rattus norvegicus OX=10116 GN=Rpl14 PE=1 SV=1	33	8	15	8	219	23.8	11.12	32.68	89.5	98.4	96.7	94.1	107.2	105.2	105	103.9
Q5XIG8	Strap	Serine-threonine kinase receptor-associated protein OS=Rattus norvegicus OX=10116 GN=Strap PE=1 SV=1	23	7	11	7	350	38.4	5.12	20.53	102.4	97.7	101.3	94.7	99.4	101.6	103.5	99.4
Q4KLF8	Arpc5	Actin-related protein 2/3 complex subunit 5 OS=Rattus norvegicus OX=10116 GN=Arpc5 PE=1 SV=3	43	6	13	6	151	16.3	5.67	30.28	98.7	95.5	94.7	95.5	106.5	102.2	103.4	103.4
Q4KMB9	Ush1c	RCG54280 OS=Rattus norvegicus OX=10116 GN=Ush1c PE=1 SV=1	22	11	12	11	548	61.7	6.24	21.07	100.1	102.4	103.5	99.2	98.8	99.6	101	95.5
Q7TQ90	Adh4	Ac1002 OS=Rattus norvegicus OX=10116 GN=Adh4 PE=1 SV=1	11	10	13	10	872	93.8	8.13	30.28	96.6	99.6	99.8	96.3	101.8	101.3	102.1	102.4
M0RAK2	LOC684270	RCG22622 OS=Rattus norvegicus OX=10116 GN=LOC684270 PE=1 SV=2	38	6	14	5	209	22.9	8.85	27.43	98.2	96.7	97.7	98.4	102.4	101.2	101.8	103.5
F1LQI1	Hagh	Hydroxyacyl glutathione hydrolase OS=Rattus norvegicus OX=10116 GN=Hagh PE=1 SV=2	28	7	14	7	309	34.1	7.94	28.72	102.4	105.5	101.7	100.5	96.3	99.9	95.1	98.6
Q4KLL7	Vps4b	Vacuolar protein sorting 4 homolog B OS=Rattus norvegicus OX=10116 GN=Vps4b PE=1 SV=1	25	8	11	6	444	49.4	7.11	23.77	94.9	104	100.1	95.2	103.5	101.9	102.7	97.7
P62716	Ppp2cb	Serine/threonine-protein phosphatase 2A catalytic subunit beta isoform OS=Rattus norvegicus OX=10116 GN=Ppp2cb PE=2 SV=1	34	7	8	1	309	35.6	5.43	19.66	86.7	95.3	117.6	88.5	116.1	110.3	87.2	98.2
P16290	Pgam2	Phosphoglycerate mutase 2 OS=Rattus norvegicus OX=10116 GN=Pgam2 PE=1 SV=2	15	5	16	1	253	28.7	8.72	23.98	113.8	103.6	110.5	108.6	90.6	90.7	89.9	92.3
A0A0G2JTV2	Cald1	Non-muscle caldesmon OS=Rattus norvegicus OX=10116 GN=Cald1 PE=1 SV=1	15	9	12	9	636	72.2	6.71	18.89	94.1	91.1	90.3	95.5	107.5	106.5	107	108
E9PT66	Sf3b3	Splicing factor 3b, subunit 3 OS=Rattus norvegicus OX=10116 GN=Sf3b3 PE=1 SV=2	10	9	10	9	1217	135.5	5.26	22.51	95.2	93.3	96.4	101.4	107	101.7	104.3	100.7
A1L1J8	Rab5b	RAB5B, member RAS oncogene family OS=Rattus norvegicus OX=10116 GN=Rab5b PE=1 SV=1	43	7	12	5	215	23.7	8.13	25.3	98.8	97.2	94	99.3	101.8	102.2	103.3	103.5
Q5I0K3	Clybl	Citramalyl-CoA lyase, mitochondrial OS=Rattus norvegicus OX=10116 GN=Clybl PE=2 SV=2	31	8	11	8	338	37.3	7.97	27.71	104.2	103.2	100	102.2	101.2	93.6	98.9	96.8
F1LZJ4	Hyi	Putative hydroxypyruvate isomerase OS=Rattus norvegicus OX=10116 GN=Hyi PE=1 SV=2	27	6	7	6	277	30.6	5.64	25.45	103.8	102	106.1	101.2	95.5	94.8	99.5	97.1
P27952	Rps2	40S ribosomal protein S2 OS=Rattus norvegicus OX=10116 GN=Rps2 PE=1 SV=1	27	8	19	8	293	31.2	10.24	35.74	96.4	95.4	97.1	96.8	103.5	103.6	102.4	104.7
G3V644	Ndufv3	NADH dehydrogenase (Ubiquinone) flavoprotein 3-like, isoform CRA_a OS=Rattus norvegicus OX=10116 GN=Ndufv3 PE=1 SV=1	27	8	11	8	458	49.3	8.84	24.89	102.1	96.5	100.7	101	98.7	100.2	101.2	99.7
D4AC36	Eif3f	Eukaryotic translation initiation factor 3 subunit F OS=Rattus norvegicus OX=10116 GN=Eif3f PE=1 SV=3	21	7	14	7	361	38	5.45	27.21	98.1	99.2	102.1	97.1	100.9	101.3	99.3	101.9
A0A0G2JZA2	Grpel1	GrpE protein homolog OS=Rattus norvegicus OX=10116 GN=Grpel1 PE=1 SV=1	42	10	13	10	230	25.8	8.15	26.38	99.8	97.6	95.8	100.5	101.8	100.8	101.3	102.4
D3ZE15	Ndufa13	NADH:ubiquinone oxidoreductase subunit A13 OS=Rattus norvegicus OX=10116 GN=Ndufa13 PE=1 SV=1	38	5	15	5	144	16.8	9.48	38.65	103.4	99.3	100	102.8	100.3	96.9	99.3	98
G3V8U9	Psmb4	Proteasome subunit beta OS=Rattus norvegicus OX=10116 GN=Psmb4 PE=1 SV=2	32	5	9	5	232	25.7	6.34	19.47	96.2	96.6	100.4	101.7	103.8	101	99.3	101.1
G3V9A3	Sfn	RCG31390 OS=Rattus norvegicus OX=10116 GN=Sfn PE=3 SV=1	20	5	21	1	248	27.7	4.78	50.16	100.3	84.4	89.6	97	107.7	113	101.4	106.5
Q5XI73	Arhgdia	Rho GDP-dissociation inhibitor 1 OS=Rattus norvegicus OX=10116 GN=Arhgdia PE=1 SV=1	29	5	10	5	204	23.4	5.2	30.93	91.1	92.3	93.5	99.5	104.2	108.1	107.1	104.1
B1WBY5	Dnajc11	DnaJ (Hsp40) homolog, subfamily C, member 11 OS=Rattus norvegicus OX=10116 GN=Dnajc11 PE=1 SV=1	13	6	9	6	559	63.2	8.32	23.4	104.1	100.2	98.9	99.8	101.7	98.9	99.8	96.6
D4A6W6		Uncharacterized protein OS=Rattus norvegicus OX=10116 PE=3 SV=1	34	8	16	8	257	28.1	10.78	31.42	95	94.9	103.8	98.7	102.1	101.2	103.6	100.7
B0BNE5	Esd	S-formylglutathione hydrolase OS=Rattus norvegicus OX=10116 GN=Esd PE=2 SV=1	20	4	9	4	282	31.3	6.9	21.08	98.6	97.2	90.8	98.6	100.8	102.1	104.1	107.7
Q68G19	Ugt2b35	UDP-glucuronosyltransferase OS=Rattus norvegicus OX=10116 GN=Ugt2b35 PE=1 SV=1	15	7	12	6	530	61	8.02	24.57	103.6	105.1	103.7	104.7	97.4	94.1	97.6	93.9
A0A0G2K3W1	Vwa8	von Willebrand factor A domain-containing 8 OS=Rattus norvegicus OX=10116 GN=Vwa8 PE=1 SV=1	21	9	12	9	481	53.7	8.76	20.3	105.9	98.8	98	98	97.5	101.3	101.3	99.3
F1LVV4	Rcc2	Regulator of chromosome condensation 2 OS=Rattus norvegicus OX=10116 GN=Rcc2 PE=1 SV=1	26	8	10	8	427	46.6	8.21	24.89	97.8	90.8	97.6	95.4	101.8	102.3	108	106.2
Q566E4	Hnrnpr	Heterogeneous nuclear ribonucleoprotein R OS=Rattus norvegicus OX=10116 GN=Hnrnpr PE=1 SV=1	16	9	11	4	632	70.8	8.13	20.79	93.8	97.6	108.8	91.5	103	105	102.8	97.5
P11762	Lgals1	Galectin-1 OS=Rattus norvegicus OX=10116 GN=Lgals1 PE=1 SV=2	47	7	18	7	135	14.8	5.26	45.44	87.5	88.8	87.6	89.6	110.3	110.4	113.8	112
A0A0G2K8R3	Lmo7	LIM domain 7 OS=Rattus norvegicus OX=10116 GN=Lmo7 PE=1 SV=1	5	7	9	7	1729	195.6	6.6	25.53	96.9	104.1	99.6	100.3	99	101.2	96.6	102.3
F7FM32	RGD1311345	Queuosine salvage protein OS=Rattus norvegicus OX=10116 GN=RGD1311345 PE=1 SV=1	20	6	11	6	341	39	5.77	17.9	106.7	104.8	97.3	93.5	101.6	99.3	99.6	97.2
Q9JJI3	LOC259244	Alpha-2u globulin OS=Rattus norvegicus OX=10116 GN=LOC259244 PE=2 SV=1	32	9	27	2	181	20.6	6.9	65.33	92.5	88	92.4	92	109.9	113.8	101.8	109.6
D3ZVK7	Hist1h2ak	Histone H2A OS=Rattus norvegicus OX=10116 GN=Hist1h2ak PE=3 SV=1	27	3	44	1	130	14.1	11.05	97.08	95.5	88.6	84.6	88.2	106.3	111	111.2	114.5
P52847	Sult1b1	Sulfotransferase family cytosolic 1B member 1 OS=Rattus norvegicus OX=10116 GN=Sult1b1 PE=1 SV=2	24	7	12	7	299	34.8	8.1	19.62	101.7	99.7	108.6	101	97.8	96.9	97.7	96.7
Q4FZY0	Efhd2	EF-hand domain-containing protein D2 OS=Rattus norvegicus OX=10116 GN=Efhd2 PE=1 SV=1	29	7	15	5	239	26.7	5.07	18.16	100.7	93.8	92.6	94.7	103.8	107.1	104.1	103.3
P09456	Prkar1a	cAMP-dependent protein kinase type I-alpha regulatory subunit OS=Rattus norvegicus OX=10116 GN=Prkar1a PE=1 SV=2	25	8	12	6	381	43.1	5.35	25.67	109.7	99.2	96.2	97.9	105	94.4	97.8	99.8
Q6RUV5	Rac1	Ras-related C3 botulinum toxin substrate 1 OS=Rattus norvegicus OX=10116 GN=Rac1 PE=1 SV=1	36	8	16	7	192	21.4	8.5	34.42	96.3	93	94	98.1	103.1	105.7	106.2	103.7
G3V8D5	Pgls	6-phosphogluconolactonase OS=Rattus norvegicus OX=10116 GN=Pgls PE=1 SV=1	24	5	13	5	291	30.8	6.86	28.32	100.4	98.9	101.4	99.1	104.9	102.3	98.6	94.4
D4A9D8	Osbp	Oxysterol-binding protein OS=Rattus norvegicus OX=10116 GN=Osbp PE=1 SV=2	16	9	11	9	682	77.8	6.83	17.99	97.2	98.9	96.7	96	97.7	102.1	109.9	101.5
A0A0G2K0C1	Ces2c	Carboxylic ester hydrolase OS=Rattus norvegicus OX=10116 GN=Ces2c PE=1 SV=1	15	6	11	6	561	62.1	5.97	29.09	101.7	101	96.2	99.4	103.6	99.7	98.4	99.9
D3ZG43	Ndufs3	NADH dehydrogenase (Ubiquinone) Fe-S protein 3 (Predicted), isoform CRA_c OS=Rattus norvegicus OX=10116 GN=Ndufs3 PE=1 SV=1	26	6	15	6	264	30.2	7.53	37.38	102.6	100.4	101.8	100.9	97.1	99.6	97.7	99.8
A0A0G2K459	Mtch2	Mitochondrial carrier 2 OS=Rattus norvegicus OX=10116 GN=Mtch2 PE=1 SV=1	23	6	13	6	303	33.7	8.94	35.48	99.4	100.6	107	101.3	97.3	99.9	97.9	96.7
Q78P75	Dynll2	Dynein light chain 2, cytoplasmic OS=Rattus norvegicus OX=10116 GN=Dynll2 PE=1 SV=1	37	2	11	1	89	10.3	7.37	28.71	99.9	96.3	106.5	102.6	106.2	95.1	95.9	97.4
F1M6Y6		Uncharacterized protein OS=Rattus norvegicus OX=10116 PE=3 SV=3	30	9	40	2	178	20.4	6.11	98.34	115.2	111.3	114.6	114.7	88.3	82.1	90.7	83
A0A0G2K737	Txnl1	Thioredoxin-like protein 1 OS=Rattus norvegicus OX=10116 GN=Txnl1 PE=1 SV=1	26	5	9	5	292	32.7	5.07	18.7	96.2	92.9	102.3	100.7	104.1	101.9	101.3	100.6
D4AB03	Fam120a	Family with sequence similarity 120A OS=Rattus norvegicus OX=10116 GN=Fam120a PE=1 SV=2	10	9	11	9	1115	122.1	8.84	23.36	102.2	102.8	98.4	97.8	99.3	102.4	99.8	97.3
Q7TP91	Surf4	Ab1-205 OS=Rattus norvegicus OX=10116 GN=Surf4 PE=1 SV=1	10	6	12	6	733	83.2	9.16	17.66	97.3	91.2	98.7	97.1	103.9	101	101.8	108.9
D4A0F5	Sept7	Septin-7 OS=Rattus norvegicus OX=10116 GN=Sept7 PE=1 SV=3	22	10	19	8	438	50.8	8.57	43.44	93.4	93.8	90.4	92.3	107	104.4	108	110.7
Q0ZHH6	Atl3	Atlastin-3 OS=Rattus norvegicus OX=10116 GN=Atl3 PE=2 SV=2	17	7	10	6	541	60.5	5.8	24.33	101.3	99.3	95.8	94.4	105.4	100.5	100.3	103
D4A269		Uncharacterized protein OS=Rattus norvegicus OX=10116 PE=4 SV=1	53	5	15	5	126	13.8	7.59	35.81	100.4	98.4	97	99.6	102.3	97.9	101.8	102.6
F1MAA5	Rangap1	RAN GTPase-activating protein 1 OS=Rattus norvegicus OX=10116 GN=Rangap1 PE=1 SV=2	15	7	9	7	586	63.1	4.72	22.47	93.8	100	101.1	101.4	104.7	96.9	101.9	100.2
A0A0G2K7B6	Dysf	Dysferlin OS=Rattus norvegicus OX=10116 GN=Dysf PE=1 SV=1	6	8	10	7	2134	242.3	5.8	17.55	99.5	104.9	98.7	104.4	99.9	97.1	98.2	97.2
F1LM09	Usp7	Ubiquitin carboxyl-terminal hydrolase 7 OS=Rattus norvegicus OX=10116 GN=Usp7 PE=1 SV=2	10	10	11	10	1103	128.3	5.55	17.81	96.5	102.9	98.2	97.3	97.8	98.6	104.9	103.9
Q63803	Gnas	Guanine nucleotide-binding protein G(s) subunit alpha isoforms XLas OS=Rattus norvegicus OX=10116 GN=Gnas PE=1 SV=3	5	6	13	5	1144	122.8	4.82	34.36	100.4	95.9	101.7	104.2	100.8	98.3	97.5	101.3
P19944	Rplp1	60S acidic ribosomal protein P1 OS=Rattus norvegicus OX=10116 GN=Rplp1 PE=3 SV=1	52	2	10	2	114	11.5	4.32	35.8	91.3	96.5	94.9	93.2	103.1	107.1	107.1	106.9
F8WG91	Arl3	ADP-ribosylation factor-like protein 3 OS=Rattus norvegicus OX=10116 GN=Arl3 PE=1 SV=2	39	6	9	6	186	20.9	7.24	22.47	98.5	98	96.8	94.9	101.6	103.5	104.9	101.8
F7F557	Acot8	Acyl-coenzyme A thioesterase 8 OS=Rattus norvegicus OX=10116 GN=Acot8 PE=1 SV=1	21	8	11	8	374	42	8.65	21.74	107.7	102.9	98.5	99.3	100.1	101.6	94.9	94.9
Q5RJK6	Inpp1	Inositol polyphosphate-1-phosphatase OS=Rattus norvegicus OX=10116 GN=Inpp1 PE=1 SV=1	20	7	11	7	396	43.3	5.05	20.73	93.5	98.3	100.7	97.4	102.2	102.1	101.8	104.1
Q5XIG6	Galk2	N-acetylgalactosamine kinase OS=Rattus norvegicus OX=10116 GN=Galk2 PE=2 SV=1	19	7	10	7	458	50.2	6.46	23.55	101	104.8	98.8	99.3	98.1	96	98.9	103.2
D3ZFX4	Pgm3	Phosphoacetylglucosamine mutase OS=Rattus norvegicus OX=10116 GN=Pgm3 PE=1 SV=1	19	9	11	9	552	60.8	6.77	28.25	97.4	99.6	100.9	97.6	103.9	101.3	100.7	98.7
C7E1V1	Itpr3	Inositol 1,4,5-trisphosphate receptor type 3 OS=Rattus norvegicus OX=10116 GN=Itpr3 PE=1 SV=1	6	11	12	8	2670	304	6.54	12.61	99.8	96.4	95.2	96.9	100.8	105.4	101.1	104.4
F1LU71	Auh	Methylglutaconyl-CoA hydratase, mitochondrial OS=Rattus norvegicus OX=10116 GN=Auh PE=1 SV=2	23	8	15	8	315	33.3	9.42	23.54	102.6	105.3	101.8	99.6	97.7	100.9	94.8	97.3
P51583	Paics	Multifunctional protein ADE2 OS=Rattus norvegicus OX=10116 GN=Paics PE=1 SV=3	21	7	11	7	425	47.1	7.69	22.31	95.4	95.6	96.5	100.2	104.6	103.2	102.5	102
A0A0H2UHG0	Yars	Tyrosine--tRNA ligase OS=Rattus norvegicus OX=10116 GN=Yars PE=1 SV=1	22	12	13	12	564	63	8.44	29.32	98.3	101.1	100.9	97.1	102.3	100.8	101.1	98.4
A0A0G2JTS3	Vps29	Vacuolar protein sorting-associated protein 29 OS=Rattus norvegicus OX=10116 GN=Vps29 PE=1 SV=1	32	5	11	1	209	23.6	7.37	32.3	98.3	99.9	99.9	100.2	100.5	101.3	99.6	100.4
F7F389	C9	Complement component C9 OS=Rattus norvegicus OX=10116 GN=C9 PE=1 SV=1	16	9	12	9	580	65.2	6.1	23.44	98.6	95.9	98.2	95.5	99.9	102	105.4	104.6
F1LN59	Eif4g2	Eukaryotic translation initiation factor 4, gamma 2 OS=Rattus norvegicus OX=10116 GN=Eif4g2 PE=1 SV=2	10	10	12	10	906	102.1	7.14	22.23	94.3	101.6	103.5	101.5	98.3	101.8	99.2	99.9
D3ZFY8	LOC100912618	Ubiquitin-conjugating enzyme E2 V1 OS=Rattus norvegicus OX=10116 GN=LOC100912618 PE=1 SV=1	43	6	12	6	147	16.3	7.96	32.1	96	95.1	93.9	96.2	104.4	103.4	105.3	105.7
O88350	Rbbp9	Putative hydrolase RBBP9 OS=Rattus norvegicus OX=10116 GN=Rbbp9 PE=1 SV=2	39	5	8	5	186	21	6.2	24.16	94.9	95.4	100.9	98	101.9	104.1	103.8	100.9
D3ZXQ0	Ces2g	Carboxylic ester hydrolase OS=Rattus norvegicus OX=10116 GN=Ces2g PE=1 SV=1	16	7	9	6	560	62.9	6.49	25.72	98	94.6	94.8	96.5	103.8	108.8	101.4	102
D3ZM69	Epb41l2	Erythrocyte membrane protein band 4.1-like 2 OS=Rattus norvegicus OX=10116 GN=Epb41l2 PE=1 SV=2	9	8	11	5	996	110.6	5.43	11.19	98.7	95.9	96.5	95.3	102.1	107.1	102.5	102
B1WC61	Acad9	Acad9 protein OS=Rattus norvegicus OX=10116 GN=Acad9 PE=1 SV=1	16	10	10	10	625	68.8	7.69	19.72	100.8	97.6	98.7	102.4	99.9	97.8	102.3	100.4
G3V728	Nipsnap1	4-nitrophenylphosphatase domain and non-neuronal SNAP25-like protein homolog 1 (C. elegans), isoform CRA_b OS=Rattus norvegicus OX=10116 GN=Nipsnap1 PE=1 SV=1	32	6	14	5	284	33.3	9.38	30.79	102.6	98.5	102.6	99.5	96.8	97.9	100.6	101.5
F7EL36	Anp32a	Acidic leucine-rich nuclear phosphoprotein 32 family member A OS=Rattus norvegicus OX=10116 GN=Anp32a PE=1 SV=2	26	9	14	7	247	28.5	4.08	27.45	91.8	93	93.7	97.1	105.2	104.7	108.3	106.3
A0A0G2JSL0	LOC100360846	Proteasome subunit beta type OS=Rattus norvegicus OX=10116 GN=LOC100360846 PE=3 SV=1	37	5	13	5	238	25.3	5	19.54	97.9	102.1	101.3	99.7	100.6	96.8	101.5	99.9
B2RZ72	Arpc4	Actin-related protein 2/3 complex subunit 4 OS=Rattus norvegicus OX=10116 GN=Arpc4 PE=1 SV=1	43	7	12	7	168	19.7	8.43	29.26	100	93.9	94.6	95.6	106.7	101.4	105.3	102.5
Q9JK64	Abcb1a	ATP-binding cassette, subfamily B (MDR/TAP), member 1B OS=Rattus norvegicus OX=10116 GN=Abcb1a PE=1 SV=1	7	6	8	6	1272	140.2	8.62	14.07	112.2	104.8	103.7	105.9	91.6	91.9	92.2	97.7
Q6AXT5	Rab21	Ras-related protein Rab-21 OS=Rattus norvegicus OX=10116 GN=Rab21 PE=2 SV=1	28	5	10	5	223	24.1	7.94	19.76	100.8	98.8	101.6	100.5	102.1	99.7	99.5	97
Q9ER24	Atxn10	Ataxin-10 OS=Rattus norvegicus OX=10116 GN=Atxn10 PE=1 SV=1	27	10	14	10	475	53.7	5.15	14.41	96	98.9	97.3	97.3	98	102.9	104.2	105.4
G3V9Z3	Maoa	Amine oxidase OS=Rattus norvegicus OX=10116 GN=Maoa PE=1 SV=1	18	9	11	9	526	59.5	7.93	21.53	96	99.5	94.8	99.1	99.2	104	104.7	102.7
A0A0G2JVW5	Huwe1	E3 ubiquitin-protein ligase HUWE1 OS=Rattus norvegicus OX=10116 GN=Huwe1 PE=1 SV=1	3	8	9	8	4062	447.4	5.4	20.27	101.1	99.3	101.9	92.3	104.2	97.9	103.7	99.6
Q6AY58	Bcap31	B-cell receptor-associated protein 31 OS=Rattus norvegicus OX=10116 GN=Bcap31 PE=1 SV=1	24	6	16	6	245	27.9	8.88	27.75	92.4	93.3	113	97.2	109.9	96.4	99	98.9
Q6P685	Eif2s2	Eukaryotic translation initiation factor 2 subunit beta OS=Rattus norvegicus OX=10116 GN=Eif2s2 PE=1 SV=1	25	8	12	8	333	38.2	5.8	20.01	99.2	100.4	99.1	97.2	104.9	100.2	99.9	99.1
G3V8F8	Nes	Nestin OS=Rattus norvegicus OX=10116 GN=Nes PE=1 SV=1	5	7	8	7	1893	208.8	4.32	15.62	94.6	97.8	95.5	96.2	104.9	102.5	104.6	103.9
Q63692	Cdc37	Hsp90 co-chaperone Cdc37 OS=Rattus norvegicus OX=10116 GN=Cdc37 PE=1 SV=2	20	7	12	7	379	44.5	5.34	17.67	96.4	99	100	96.5	100	101.2	106.1	100.9
D4AEC0	H2afv	Histone H2A OS=Rattus norvegicus OX=10116 GN=H2afv PE=3 SV=1	31	4	33	2	128	13.5	10.58	73.77	91.7	92.1	94.7	94.9	106	107	106.5	107.1
A0A0G2JY12	Pxn	Paxillin OS=Rattus norvegicus OX=10116 GN=Pxn PE=1 SV=1	12	6	8	6	586	64	6.39	22.79	154.2	104.3	102	86	89.3	91.5	87.7	85
Q66HR2	Mapre1	Microtubule-associated protein RP/EB family member 1 OS=Rattus norvegicus OX=10116 GN=Mapre1 PE=1 SV=3	25	6	10	6	268	30	5.22	24.55	98.3	105.1	99.8	96.3	102.9	101.8	96.4	99.3
Q9JIK1	Cdhr5	Cadherin-related family member 5 OS=Rattus norvegicus OX=10116 GN=Cdhr5 PE=1 SV=1	7	6	11	6	862	90.9	4.83	26.31	99.1	100.2	101.6	101.6	98.3	101.2	98.9	99.1
Q5U316	Rab35	Ras-related protein Rab-35 OS=Rattus norvegicus OX=10116 GN=Rab35 PE=1 SV=1	31	5	12	3	201	23	8.29	33.47	103.3	103	97.6	94.8	100.2	102.3	96.8	101.9
A0A0G2JZH8	Pdhx	Dihydrolipoamide acetyltransferase component of pyruvate dehydrogenase complex OS=Rattus norvegicus OX=10116 GN=Pdhx PE=1 SV=1	23	10	13	10	502	54.1	8.75	23.24	101.6	101	102.2	101.4	98.3	95.7	98.4	101.5
Q4V7C6	Gmps	GMP synthase [glutamine-hydrolyzing] OS=Rattus norvegicus OX=10116 GN=Gmps PE=1 SV=1	14	9	10	9	693	76.7	6.64	20.86	105	101.7	103.8	94.6	99.9	98.3	101.6	95
A0A0G2JXC1	Lman1	Protein ERGIC-53 OS=Rattus norvegicus OX=10116 GN=Lman1 PE=1 SV=1	21	8	11	7	517	58.1	6.49	27.62	98.7	93.1	98	97.4	101.7	102.5	104.5	104.1
D3Z9B0	Glod5	Glyoxalase domain-containing 5 OS=Rattus norvegicus OX=10116 GN=Glod5 PE=1 SV=1	41	6	12	6	148	16.6	5.9	31.48	104.2	102.2	102.7	100.4	98	99.5	98.3	94.9
P12075	Cox5b	Cytochrome c oxidase subunit 5B, mitochondrial OS=Rattus norvegicus OX=10116 GN=Cox5b PE=1 SV=2	25	4	18	4	129	13.9	7.78	37.93	101.8	103.4	100.9	104.3	98.7	96.2	98.4	96.2
A0A0H2UHS7	Rpl18	60S ribosomal protein L18 OS=Rattus norvegicus OX=10116 GN=Rpl18 PE=1 SV=1	24	4	14	4	189	21.8	11.78	36.44	94.7	97.7	95.3	97.5	103.5	101.6	104.2	105.7
A0A0G2JZH0	Cab39	Calcium-binding protein 39 OS=Rattus norvegicus OX=10116 GN=Cab39 PE=1 SV=1	27	9	12	6	341	39.8	6.89	24.78	98.2	102.2	101.8	96.4	100.4	103.2	97.2	100.6
P09330	Prps2	Ribose-phosphate pyrophosphokinase 2 OS=Rattus norvegicus OX=10116 GN=Prps2 PE=1 SV=3	24	5	8	2	318	34.8	6.61	23.79	90.9	100.6	100.6	97.4	95.9	116.7	96.1	101.8
D3ZVN7	Ppox	Protoporphyrinogen oxidase OS=Rattus norvegicus OX=10116 GN=Ppox PE=1 SV=1	21	7	10	7	477	50.8	8.37	13.6	102.7	101.2	103.7	92.7	103.1	92.3	101.2	103
G3V9N0	Pabpc4	Polyadenylate-binding protein OS=Rattus norvegicus OX=10116 GN=Pabpc4 PE=1 SV=2	13	7	12	5	644	70.8	9.26	23.65	99.8	96.7	98.1	98.1	100.8	100.4	105.3	100.8
A0A0G2K950	Papss2	3'-phosphoadenosine 5'-phosphosulfate synthase 2 OS=Rattus norvegicus OX=10116 GN=Papss2 PE=1 SV=1	16	8	12	6	619	69.9	7.42	23.29	100.9	97.3	101.2	95.8	105.2	97.4	98.2	103.8
Q505J8	Farsa	Phenylalanine--tRNA ligase alpha subunit OS=Rattus norvegicus OX=10116 GN=Farsa PE=1 SV=1	14	7	10	7	508	57.7	8.28	18.94	101.1	99.1	96.1	92.4	104.3	98.7	104	104.4
Q5I0D5	Lhpp	Phospholysine phosphohistidine inorganic pyrophosphate phosphatase OS=Rattus norvegicus OX=10116 GN=Lhpp PE=2 SV=1	17	3	9	3	270	29.2	5.39	13.47	99.8	97.9	108.4	95.6	95.1	96.6	101.8	104.6
Q99PD4	Arpc1a	Actin-related protein 2/3 complex subunit 1A OS=Rattus norvegicus OX=10116 GN=Arpc1a PE=2 SV=1	18	6	12	6	370	41.6	8.18	22.52	98.9	97.3	97.5	101.5	101.8	100.4	101.9	100.6
G3V918	Gart	Trifunctional purine biosynthetic protein adenosine-3 OS=Rattus norvegicus OX=10116 GN=Gart PE=1 SV=1	12	9	9	9	1010	107.5	6.61	23.24	96.3	96.7	102.1	94.8	103.3	99.8	104.3	102.6
Q07803	Gfm1	Elongation factor G, mitochondrial OS=Rattus norvegicus OX=10116 GN=Gfm1 PE=1 SV=2	12	8	11	8	751	83.4	6.8	25.5	97.1	100.4	103.6	99.1	101.4	99.2	99.5	99.6
A0A0G2K8H6	Ctsh	Pro-cathepsin H OS=Rattus norvegicus OX=10116 GN=Ctsh PE=1 SV=1	20	6	13	6	370	42	8.62	20.11	96.9	97.4	102.1	97.3	104.6	97.9	103.3	100.3
Q9JMJ4	Prpf19	Pre-mRNA-processing factor 19 OS=Rattus norvegicus OX=10116 GN=Prpf19 PE=1 SV=2	21	7	9	7	504	55.2	6.61	12.96	95.7	96.3	99.5	96.3	102.6	102.2	104	103.5
Q5U2R0	Mat2b	Methionine adenosyltransferase 2 subunit beta OS=Rattus norvegicus OX=10116 GN=Mat2b PE=2 SV=1	24	6	12	6	334	37.4	6.95	16.57	96.8	96.5	103.6	96.3	104.7	100.8	101.9	99.4
Q9QX71	Napsa	Napsin OS=Rattus norvegicus OX=10116 GN=Napsa PE=1 SV=1	19	5	12	5	420	45.6	8.84	23.01	97.2	100	97.8	100.3	101.4	103.8	100.4	99.2
Q6P686	Ostf1	Osteoclast-stimulating factor 1 OS=Rattus norvegicus OX=10116 GN=Ostf1 PE=1 SV=1	46	6	8	6	214	23.7	5.68	16.74	97.8	97.6	99.3	99.7	103.9	103.7	98.1	100
F1LMB9	Exoc2	Exocyst complex component 2-like OS=Rattus norvegicus OX=10116 GN=Exoc2 PE=1 SV=1	11	8	9	8	924	104	7.17	17.52	98.6	100.9	91.8	111.1	110.5	98.3	94.2	94.7
D3ZRM9	LOC100360491	60S ribosomal protein L13 OS=Rattus norvegicus OX=10116 GN=LOC100360491 PE=3 SV=1	29	6	14	6	211	24.2	11.41	39.6	93.5	95.1	96.8	96.7	104.9	106.1	103.9	103
Q6AXQ0	Sae1	SUMO-activating enzyme subunit 1 OS=Rattus norvegicus OX=10116 GN=Sae1 PE=2 SV=1	31	9	10	9	349	38.5	5.16	14.74	91.7	98.5	108.3	91.9	102.7	101.9	104.5	100.5
D3ZJR1	Eps15l1	Epidermal growth factor receptor pathway substrate 15-like 1 OS=Rattus norvegicus OX=10116 GN=Eps15l1 PE=1 SV=3	10	7	10	7	909	99.4	5.02	14.94	97	99.3	98.9	97.6	101.6	102.3	101.9	101.2
F1LR42	Rufy1	RUN and FYVE domain-containing 1 OS=Rattus norvegicus OX=10116 GN=Rufy1 PE=1 SV=1	15	8	10	8	711	80.3	5.72	17.63	97.8	96.6	99.1	98.2	103.8	99.6	104.1	100.8
M0RC99	Rab5a	Ras-related protein Rab-5A OS=Rattus norvegicus OX=10116 GN=Rab5a PE=2 SV=1	31	5	11	3	215	23.6	8.15	27.02	99.9	97	99.2	101.8	99.5	96.7	105.3	100.5
O88867	Kmo	Kynurenine 3-monooxygenase OS=Rattus norvegicus OX=10116 GN=Kmo PE=1 SV=1	17	7	10	7	478	54.3	8.75	18.25	100.7	100.5	106.7	100.4	102.7	96.6	97	95.4
Q9Z269	Vapb	Vesicle-associated membrane protein-associated protein B OS=Rattus norvegicus OX=10116 GN=Vapb PE=1 SV=3	32	6	11	5	243	26.9	7.78	19.17	100.1	104.8	95.8	96.9	102	100.6	99.2	100.7
F7EUU4	Cops5	COP9 signalosome subunit 5 OS=Rattus norvegicus OX=10116 GN=Cops5 PE=1 SV=1	22	8	12	8	389	43.6	7.71	27.51	102.1	98.1	100.3	97.8	100.3	99.9	99.1	102.4
Q99MZ8	Lasp1	LIM and SH3 domain protein 1 OS=Rattus norvegicus OX=10116 GN=Lasp1 PE=1 SV=1	21	5	8	5	263	30	7.05	22.45	92.3	95.3	90.8	92.9	107.6	104.3	108.1	108.8
A0A0G2JSP1	Umod	Uromodulin OS=Rattus norvegicus OX=10116 GN=Umod PE=4 SV=1	12	9	14	9	644	71	4.92	26.79	91.9	91.8	94.7	91.3	109	107.1	108.1	106.1
Q5XI07	Lpp	Lipoma-preferred partner homolog OS=Rattus norvegicus OX=10116 GN=Lpp PE=1 SV=1	14	5	15	4	632	68.2	7.66	34.56	94	91.3	92.5	95	105.9	99.6	110.7	110.9
Q5FWY5	Aip	AH receptor-interacting protein OS=Rattus norvegicus OX=10116 GN=Aip PE=1 SV=1	22	5	10	5	330	37.6	6.54	23.12	101	97.3	103	97.4	102.5	101.7	97.4	99.8
P80067	Ctsc	Dipeptidyl peptidase 1 OS=Rattus norvegicus OX=10116 GN=Ctsc PE=1 SV=3	12	6	9	6	462	52.2	6.89	15.37	97.2	96.6	91.4	95.5	108.9	97.1	103	110.2
P84850	D2hgdh	D-2-hydroxyglutarate dehydrogenase, mitochondrial OS=Rattus norvegicus OX=10116 GN=D2hgdh PE=3 SV=1	22	7	9	7	535	58.8	8.13	20.48	99.5	97.2	101.1	102.8	103.4	97.5	99	99.5
A0JN30	Cnpy2	Canopy 2 homolog (Zebrafish) OS=Rattus norvegicus OX=10116 GN=Cnpy2 PE=1 SV=1	24	5	10	5	182	20.7	5.14	21.18	98.7	95.6	99.3	94.9	104.6	101.1	102.1	103.7
D3ZPH0		Uncharacterized protein OS=Rattus norvegicus OX=10116 PE=4 SV=2	34	6	11	6	160	18.6	10.35	29	100	94.9	97.6	97.5	103.8	99.4	103.8	103
G3V960	Gamt	Guanidinoacetate N-methyltransferase OS=Rattus norvegicus OX=10116 GN=Gamt PE=1 SV=1	23	5	8	5	236	26.4	6.27	20.4	104.3	104.1	103.4	99.7	99.1	102.9	93.6	93
D4A8G5	Tgfbi	Transforming growth factor, beta-induced OS=Rattus norvegicus OX=10116 GN=Tgfbi PE=1 SV=2	17	8	11	8	685	74.7	7.5	22.07	100.2	100.2	100.5	96.7	98.5	100	101.8	102.2
A0A0G2K866	Abcb7	ATP-binding cassette sub-family B member 7, mitochondrial OS=Rattus norvegicus OX=10116 GN=Abcb7 PE=1 SV=1	11	7	9	7	752	82.5	9.32	18.16	105.6	99.2	102	99.4	98.3	96.1	97.4	102
P47875	Csrp1	Cysteine and glycine-rich protein 1 OS=Rattus norvegicus OX=10116 GN=Csrp1 PE=1 SV=2	42	6	12	6	193	20.6	8.57	19.3	90.3	95.2	91.6	92.7	107	110.8	106.6	105.8
A0A0G2K9I8	LOC100361025	Protein arginine methyltransferase 1-like OS=Rattus norvegicus OX=10116 GN=LOC100361025 PE=3 SV=1	31	8	11	8	353	40.5	5.59	16.38	94.5	97.3	93.1	97.5	104.8	102.8	102.4	107.5
O70513	Lgals3bp	Galectin-3-binding protein OS=Rattus norvegicus OX=10116 GN=Lgals3bp PE=1 SV=2	13	7	10	7	574	63.7	5.35	24.76	92.7	95.4	96.2	90.8	106.3	106.7	106.4	105.5
Q6AYK8	Eif3d	Eukaryotic translation initiation factor 3 subunit D OS=Rattus norvegicus OX=10116 GN=Eif3d PE=1 SV=1	15	6	9	6	548	63.9	6.05	24.47	98	95.3	100.5	92.8	104.8	100.9	107	100.6
A0A0G2JTA0	Faf2	FAS-associated factor 2 OS=Rattus norvegicus OX=10116 GN=Faf2 PE=1 SV=1	17	5	7	5	445	52.4	5.47	17.71	98.2	96.5	101.3	100.2	99	98.4	104.1	102.3
P62282	Rps11	40S ribosomal protein S11 OS=Rattus norvegicus OX=10116 GN=Rps11 PE=1 SV=3	31	5	15	5	158	18.4	10.3	28.75	93.7	95	95.2	96.1	103.8	107.3	104.8	104
A0A0G2K1D2	Rap1gds1	RAP1, GTP-GDP dissociation stimulator 1 (Predicted), isoform CRA_a OS=Rattus norvegicus OX=10116 GN=Rap1gds1 PE=1 SV=1	19	8	8	8	527	57.5	5.63	19.91	95.2	98.5	101.7	100.2	101.4	105.5	97.7	99.7
A0A0G2JY43	Aldh3a2	Fatty aldehyde dehydrogenase OS=Rattus norvegicus OX=10116 GN=Aldh3a2 PE=1 SV=1	12	6	9	6	584	65.3	9.1	20.61	98.9	95.2	94.9	96.2	101.2	104.1	103.2	106.3
Q5U216	Ddx39a	ATP-dependent RNA helicase DDX39A OS=Rattus norvegicus OX=10116 GN=Ddx39a PE=2 SV=1	20	6	12	2	427	49.1	5.68	22.5	99.9	99.1	96.1	94.3	100.7	97.3	107.8	104.9
B0BNA5	Cotl1	Coactosin-like protein OS=Rattus norvegicus OX=10116 GN=Cotl1 PE=1 SV=1	46	7	17	7	142	15.9	5.4	28.43	97.3	95.1	97	100.1	102.5	100.7	105.3	101.9
D3ZFA8	LOC100362366	40S ribosomal protein S17-like OS=Rattus norvegicus OX=10116 GN=LOC100362366 PE=3 SV=1	32	3	9	3	135	15.5	9.77	24.02	86.9	96	91.3	96.9	100.5	110.7	107.1	110.6
Q9Z2F5	Ctbp1	C-terminal-binding protein 1 OS=Rattus norvegicus OX=10116 GN=Ctbp1 PE=1 SV=3	19	7	8	3	430	46.6	6.65	18.9	99.5	97.4	97.6	92.9	102.9	106.4	100.5	102.7
Q9Z1M9	Smc1a	Structural maintenance of chromosomes protein 1A OS=Rattus norvegicus OX=10116 GN=Smc1a PE=1 SV=1	8	9	10	9	1233	143.1	7.64	18.11	100.4	95.8	99.9	97.8	101.6	99.9	101.1	103.5
G3V6W6	Psmc6	Proteasome 26S subunit, ATPase 6 OS=Rattus norvegicus OX=10116 GN=Psmc6 PE=1 SV=1	26	8	9	8	403	45.8	7.78	18.37	100.2	98.6	98.5	97.4	103.2	100.4	103.1	98.5
Q5RJR2	Twf1	Twinfilin-1 OS=Rattus norvegicus OX=10116 GN=Twf1 PE=1 SV=1	14	5	8	5	350	40.1	6.67	21.47	94.2	94.7	95.2	98.9	101.7	103.3	106.6	105.4
D3ZMX6	Sntb2	Syntrophin, beta 2 OS=Rattus norvegicus OX=10116 GN=Sntb2 PE=1 SV=3	22	10	11	10	522	56.5	8.69	20.14	108.1	94.8	103.9	95.6	102.5	95	97.5	102.6
P63170	Dynll1	Dynein light chain 1, cytoplasmic OS=Rattus norvegicus OX=10116 GN=Dynll1 PE=1 SV=1	45	3	11	2	89	10.4	7.4	30.73	93.3	98.5	93.6	94.1	100.1	109.1	103.5	107.6
P47967	Lgals5	Galectin-5 OS=Rattus norvegicus OX=10116 GN=Lgals5 PE=1 SV=2	50	6	9	6	145	16.2	6.67	15.4	107.7	114.1	110.7	106.4	94.4	85.7	91.1	89.8
Q6AXW2	Tmod3	RCG25684, isoform CRA_a OS=Rattus norvegicus OX=10116 GN=Tmod3 PE=1 SV=1	18	5	12	5	352	39.4	4.89	26.35	93.6	98	97.8	100.5	113.4	98.4	98.5	99.8
Q99JC6	Tapbp	TAP-binding protein OS=Rattus norvegicus OX=10116 GN=Tapbp PE=1 SV=1	12	5	13	5	464	50	7.88	31.37	99.8	95.4	96.6	93.2	101.5	101.6	106.9	104.9
D4A4T9	Chordc1	Cysteine and histidine-rich domain-containing protein 1 OS=Rattus norvegicus OX=10116 GN=Chordc1 PE=3 SV=1	34	8	9	8	331	37.3	7.9	18.8	101.6	96.7	98.3	96.9	103	100.9	102	100.7
O35821	Mybbp1a	Myb-binding protein 1A OS=Rattus norvegicus OX=10116 GN=Mybbp1a PE=1 SV=2	6	7	11	7	1344	152.2	8.95	16.49	102.7	95.5	98.1	96.4	103.5	101.2	99.4	103.2
Q6T5E8	Ugt1a7c	UDP-glucuronosyltransferase OS=Rattus norvegicus OX=10116 GN=Ugt1a7c PE=1 SV=1	11	5	11	1	531	59.5	8.34	20.24	89.7	92.1	84.1	93.6	106.7	117.4	109.1	107.3
F1LML7	Hip1r	Huntingtin-interacting protein 1-related OS=Rattus norvegicus OX=10116 GN=Hip1r PE=1 SV=1	8	7	8	7	1069	119.5	6.55	15.52	99.2	98.2	92	100.5	101.4	104.5	104.8	99.3
Q6P9U8	Eif3h	Eukaryotic translation initiation factor 3 subunit H OS=Rattus norvegicus OX=10116 GN=Eif3h PE=1 SV=1	29	8	15	8	352	39.9	6.67	26.74	98.9	96	97.9	95.4	103.1	102.5	100.6	105.6
F1LS86	Iars	Isoleucine-tRNA synthetase (Predicted) OS=Rattus norvegicus OX=10116 GN=Iars PE=1 SV=2	8	8	10	8	1262	144.2	6.3	15.42	96	98.7	96.7	99	102	100.8	103	103.9
F1LXA0	Ndufa12	NADH dehydrogenase [ubiquinone] 1 alpha subcomplex subunit 12 OS=Rattus norvegicus OX=10116 GN=Ndufa12 PE=1 SV=2	38	4	11	4	145	17.2	9.7	24.86	107	101.3	96.7	96.4	96.9	100.3	100.5	100.9
Q9ESN0	Fam129a	Protein Niban OS=Rattus norvegicus OX=10116 GN=Fam129a PE=1 SV=2	11	8	11	8	937	103.4	4.7	12.84	86.9	88.1	92.4	91.1	110.6	110.9	108.9	111
P83006	Pafah2	Platelet-activating factor acetylhydrolase 2, cytoplasmic OS=Rattus norvegicus OX=10116 GN=Pafah2 PE=1 SV=2	23	9	10	9	390	43.5	6.7	17.35	120.8	102.3	102.5	96.6	93.5	92.2	89.1	103.1
Q99ML5	Pcyox1	Prenylcysteine oxidase OS=Rattus norvegicus OX=10116 GN=Pcyox1 PE=1 SV=1	17	5	8	5	504	56.3	7.09	19.01	103.1	99.7	95.5	105	96.2	98.5	102.4	99.7
G3V6I4	Marc1	Mitochondrial amidoxime reducing component 1 OS=Rattus norvegicus OX=10116 GN=Marc1 PE=1 SV=1	27	8	9	6	339	37.8	8.41	17.06	94.3	106	91.8	99.5	98.5	101.3	101.3	107.2
A0A0G2JSV3	LOC314140	Ribose-phosphate pyrophosphokinase I -like OS=Rattus norvegicus OX=10116 GN=LOC314140 PE=1 SV=1	25	6	8	3	318	34.8	6.98	20.1	95.5	95.7	103.1	100.5	104.7	97	101.4	102.1
P43138	Apex1	DNA-(apurinic or apyrimidinic site) lyase OS=Rattus norvegicus OX=10116 GN=Apex1 PE=1 SV=2	20	6	8	6	317	35.5	7.91	18.48	98.6	97.9	96.8	91.5	103.1	103	106.5	102.6
A0A0G2K273	LOC100909481	Eukaryotic translation initiation factor 3 subunit E OS=Rattus norvegicus OX=10116 GN=LOC100909481 PE=3 SV=1	17	7	10	7	445	52.2	6.04	19.91	99	94.8	100.9	94.7	102.6	103.1	102.2	102.9
A0A0G2K509	Krt5	Keratin, type II cytoskeletal 5 OS=Rattus norvegicus OX=10116 GN=Krt5 PE=1 SV=1	9	5	11	1	591	62.8	6.83	28.41	100.7	94.4	103.8	103	95.7	103.1	97.2	102.1
P18421	Psmb1	Proteasome subunit beta type-1 OS=Rattus norvegicus OX=10116 GN=Psmb1 PE=1 SV=3	23	5	8	5	240	26.5	7.36	24.71	97.2	93.5	91.2	95.2	100.2	100.6	100.4	121.8
P11240	Cox5a	Cytochrome c oxidase subunit 5A, mitochondrial OS=Rattus norvegicus OX=10116 GN=Cox5a PE=1 SV=1	42	7	20	7	146	16.1	6.54	50.48	97.7	100.7	101.1	100.1	96.9	100.7	100.2	102.6
A0A0G2JTG7	Hnrnph1	Heterogeneous nuclear ribonucleoprotein H OS=Rattus norvegicus OX=10116 GN=Hnrnph1 PE=1 SV=1	21	6	8	2	449	49.2	6.3	15.17	83.8	83.8	85.4	85.1	118.9	100.9	110.4	131.7
F1LPV0	Nars	Asparaginyl-tRNA synthetase OS=Rattus norvegicus OX=10116 GN=Nars PE=1 SV=2	12	7	11	7	558	64.1	5.86	24.27	96.1	101.4	101.6	98.4	99.5	102.9	100.8	99.4
D4ABV5	Calm2	Calmodulin-2 OS=Rattus norvegicus OX=10116 GN=Calm2 PE=1 SV=1	31	5	13	5	149	16.8	4.22	23.78	100.1	93.7	96.2	98.5	104.3	97	104.5	105.8
Q6AYC4	Capg	Macrophage-capping protein OS=Rattus norvegicus OX=10116 GN=Capg PE=1 SV=1	23	6	9	6	349	38.8	6.55	25.55	91.5	88.3	90.1	87.2	112.7	110.2	109.1	110.8
D3ZW55	Itpa	Inosine triphosphate pyrophosphatase OS=Rattus norvegicus OX=10116 GN=Itpa PE=3 SV=1	39	7	10	7	198	21.9	5.66	12.23	95	106.2	102.3	96.7	100.1	104.2	97.4	98.1
Q5U2U0	Clpx	ATP-dependent Clp protease ATP-binding subunit clpX-like, mitochondrial OS=Rattus norvegicus OX=10116 GN=Clpx PE=2 SV=1	12	6	8	6	633	69.2	7.72	22.44	99.7	97.6	101.4	97.2	102.3	101	100.4	100.4
B0BNJ1	Sri	LOC683667 protein OS=Rattus norvegicus OX=10116 GN=Sri PE=1 SV=1	39	8	16	8	198	21.6	5.9	28.66	94.7	96.1	95.1	94.8	104.3	103	106.6	105.4
D3ZW08	Adsl	Adenylosuccinate lyase OS=Rattus norvegicus OX=10116 GN=Adsl PE=1 SV=1	13	5	8	5	484	54.8	7.11	21.99	100.1	95.7	100.7	104.7	101.3	97.6	99.9	100.1
A0A0G2JST3	Krt1	Keratin, type II cytoskeletal 1 OS=Rattus norvegicus OX=10116 GN=Krt1 PE=1 SV=1	7	5	14	2	625	64.7	7.93	27.5	104.8	104	102.2	100.8	97	94.3	98.2	98.6
P21670	Psma4	Proteasome subunit alpha type-4 OS=Rattus norvegicus OX=10116 GN=Psma4 PE=1 SV=1	28	6	14	6	261	29.5	7.72	33.82	102	102.8	98.1	96.6	102.1	99.1	98	101.2
P31430	Dpep1	Dipeptidase 1 OS=Rattus norvegicus OX=10116 GN=Dpep1 PE=2 SV=2	30	9	11	9	410	45.5	6.07	25.07	105.1	104.9	104	98.5	97.6	98.1	93	99
D4A9T5	Efhd1	EF-hand domain family, member D1 OS=Rattus norvegicus OX=10116 GN=Efhd1 PE=4 SV=1	30	6	11	4	240	27	7.03	14.14	96.5	109	97.6	98.6	100.3	94.4	98.9	104.7
Q8VI04	Asrgl1	Isoaspartyl peptidase/L-asparaginase OS=Rattus norvegicus OX=10116 GN=Asrgl1 PE=1 SV=1	28	8	11	8	333	34.4	7.88	12.65	94	101.6	103.8	99.1	102.8	96	99.8	103
G3V8F5	Tomm40	Mitochondrial import receptor subunit TOM40 homolog OS=Rattus norvegicus OX=10116 GN=Tomm40 PE=1 SV=1	35	7	10	7	361	37.9	7.97	17.62	99.2	100.3	99.1	102.4	98.8	99	99.3	101.9
D4A409	Lama1	Laminin subunit alpha 1 OS=Rattus norvegicus OX=10116 GN=Lama1 PE=2 SV=1	5	11	11	11	3083	338	6.67	12.22	101.5	102.8	101.8	98.6	102	97.3	97	99
D3ZQM0	Sf3a1	Splicing factor 3a, subunit 1 OS=Rattus norvegicus OX=10116 GN=Sf3a1 PE=1 SV=1	10	7	9	7	791	88.5	5.22	13.53	97.5	98.3	100.3	97.2	104.7	99.5	102.7	99.8
M0R9L0	Naca	Nascent polypeptide-associated complex subunit alpha OS=Rattus norvegicus OX=10116 GN=Naca PE=1 SV=1	2	3	10	3	2163	220.1	9.32	22.24	103.1	93.6	94.5	98.6	100	101.7	103.3	105.2
F1LXV0	Rps6ka1	Ribosomal protein S6 kinase OS=Rattus norvegicus OX=10116 GN=Rps6ka1 PE=1 SV=2	12	8	11	2	735	82.9	7.97	17.67	99.7	100.6	101.2	95.2	96.5	104	104.2	98.5
A0A0G2K658	LOC102556347	Carbonyl reductase [NADPH] 1-like OS=Rattus norvegicus OX=10116 GN=LOC102556347 PE=1 SV=1	21	6	8	6	329	36.2	8.59	15.61	91.1	95	95.1	97.4	105.6	108.3	105.2	102.3
P70470	Lypla1	Acyl-protein thioesterase 1 OS=Rattus norvegicus OX=10116 GN=Lypla1 PE=1 SV=1	26	4	9	4	230	24.7	6.51	23.7	99.8	104.9	99.2	101.5	98.2	95.3	101.9	99.2
F1LPW0		Uncharacterized protein OS=Rattus norvegicus OX=10116 PE=1 SV=1	14	6	13	6	495	54.8	5.83	20.38	108.8	104.2	104.4	102	95.9	93.1	95	96.6
Q6P4Z9	Cops8	COP9 signalosome complex subunit 8 OS=Rattus norvegicus OX=10116 GN=Cops8 PE=2 SV=1	30	4	8	4	209	23.2	5.2	23.34	103.4	98.3	98.6	98.5	99.8	98.8	98.9	103.8
D4A1B9	Smc3	Structural maintenance of chromosomes protein OS=Rattus norvegicus OX=10116 GN=Smc3 PE=1 SV=1	10	9	9	9	1217	141.5	7.18	15.94	103.2	95.2	109.1	101.3	98.5	97.4	98	97.4
A0A0G2K502	Me2	Malic enzyme OS=Rattus norvegicus OX=10116 GN=Me2 PE=1 SV=1	14	5	6	5	591	66.3	7.91	19.39	95.6	101.5	96.3	97.1	103.1	102.4	97.4	106.6
F1LR87	Hexb	Beta-hexosaminidase OS=Rattus norvegicus OX=10116 GN=Hexb PE=1 SV=3	14	7	11	7	538	61.5	6.84	12.26	105	104.6	105.2	99.1	98.9	97.6	96.5	93.1
M0R979	Thbs1	Thrombospondin 1 OS=Rattus norvegicus OX=10116 GN=Thbs1 PE=1 SV=2	7	7	10	7	1144	127	5.03	21.6	96.9	99.2	99.4	97.6	100.4	102.1	100.2	104.2
D4A3V5	Cgnl1	Cingulin-like 1 OS=Rattus norvegicus OX=10116 GN=Cgnl1 PE=1 SV=1	6	7	9	7	1292	147.8	5.55	14.51	96.8	96.8	102.7	99.7	103.6	98.6	100.6	101.3
Q63228	Gmfb	Glia maturation factor beta OS=Rattus norvegicus OX=10116 GN=Gmfb PE=1 SV=2	37	4	8	4	142	16.7	5.44	20.99	98.4	95.7	97.6	98.9	102.4	104.7	100.8	101.5
P04905	Gstm1	Glutathione S-transferase Mu 1 OS=Rattus norvegicus OX=10116 GN=Gstm1 PE=1 SV=2	37	9	11	8	218	25.9	8.19	21.4	97.5	101.8	98	98.1	99.8	102.7	102.1	99.9
Q5RJK5	Cbx3	Chromobox 3 OS=Rattus norvegicus OX=10116 GN=Cbx3 PE=1 SV=1	30	4	8	4	183	20.8	5.33	18.42	92.5	95	90.2	91.4	104.4	105.7	109.8	111.1
P61972	Nutf2	Nuclear transport factor 2 OS=Rattus norvegicus OX=10116 GN=Nutf2 PE=1 SV=1	51	4	8	4	127	14.5	5.38	23.46	93.1	95.4	94.2	95.8	103.9	103.2	109.9	104.5
A0A0G2K4X8	Skp1	S-phase kinase-associated protein 1 OS=Rattus norvegicus OX=10116 GN=Skp1 PE=1 SV=1	37	7	11	7	165	18.9	4.54	12.41	98.5	94.1	96.4	99	103.8	101.8	105.2	101.2
Q63362	Ndufa5	NADH dehydrogenase [ubiquinone] 1 alpha subcomplex subunit 5 OS=Rattus norvegicus OX=10116 GN=Ndufa5 PE=1 SV=3	37	4	13	3	116	13.4	7.43	38.53	102	104.2	106	101.3	100.8	97.7	93.1	94.9
P86182	Ccdc22	Coiled-coil domain-containing protein 22 OS=Rattus norvegicus OX=10116 GN=Ccdc22 PE=1 SV=2	15	7	8	7	627	70.8	6.11	19.63	101.1	92.7	103	98.6	108.2	99.3	99	98.2
D3ZVS2	L2hgdh	L-2-hydroxyglutarate dehydrogenase OS=Rattus norvegicus OX=10116 GN=L2hgdh PE=1 SV=1	12	5	7	5	463	50.7	8.48	18.43	100.5	100	100.1	101	100.7	98.2	98.2	101.3
G3V8U8	Bcat2	Branched-chain-amino-acid aminotransferase OS=Rattus norvegicus OX=10116 GN=Bcat2 PE=1 SV=1	19	6	10	6	393	44.2	8.16	22.41	109	110.1	111.5	108.5	90.6	91	91.5	87.9
Q9WTQ2	Podxl	Podocalyxin OS=Rattus norvegicus OX=10116 GN=Podxl PE=1 SV=2	13	4	9	4	485	51.6	4.91	25.27	100.2	104.6	104.9	103	97.4	97	97.1	95.8
Q498D9	Gipc2	PDZ domain-containing protein GIPC2 OS=Rattus norvegicus OX=10116 GN=Gipc2 PE=2 SV=1	23	6	10	6	314	34.2	7.03	19.31	94.9	97.4	96.2	96.6	108.6	101.1	105.8	99.3
Q5FVM4	Nono	Non-POU domain-containing octamer-binding protein OS=Rattus norvegicus OX=10116 GN=Nono PE=1 SV=3	13	6	13	6	476	54.9	8.95	17.98	93.9	95.9	94.6	94.9	106.4	105.4	105.1	103.7
A9UMV9	Ndufa7	NADH:ubiquinone oxidoreductase subunit A7 OS=Rattus norvegicus OX=10116 GN=Ndufa7 PE=1 SV=1	52	6	13	6	112	12.5	10.48	26.36	98.3	105.1	106	99.8	97.2	97.4	96.3	99.8
D3ZXP3	H2afx	Histone H2A OS=Rattus norvegicus OX=10116 GN=H2afx PE=1 SV=1	34	5	30	2	143	15.1	10.74	47.51	94.9	94.6	92.5	92.6	106.2	105.3	106.7	107.1
Q920P6	Ada	Adenosine deaminase OS=Rattus norvegicus OX=10116 GN=Ada PE=1 SV=3	23	7	10	7	352	39.9	5.5	16.74	95.9	100.3	98.1	95.4	102.7	99.1	105.2	103.3
D3ZC56	Dst	Dystonin OS=Rattus norvegicus OX=10116 GN=Dst PE=1 SV=3	1	6	9	2	7512	846.7	5.34	20.86	105.6	99.3	97.3	95.8	100.2	107.6	98.9	95.3
Q5FVQ8	Nlrx1	NLR family member X1 OS=Rattus norvegicus OX=10116 GN=Nlrx1 PE=2 SV=1	7	6	8	6	973	107.5	7.56	16.63	100.2	107.8	107.6	102.2	99.7	98	91.5	93
B2RZC6	Ilf2	Ilf2 protein OS=Rattus norvegicus OX=10116 GN=Ilf2 PE=1 SV=1	30	8	11	8	390	43	5.26	15.45	95.2	92.9	95	96.4	112	103	105.2	100.3
F1M1W1	Acsm1	Acyl-coenzyme A synthetase ACSM2, mitochondrial OS=Rattus norvegicus OX=10116 GN=Acsm1 PE=1 SV=3	16	7	11	6	577	65.3	7.81	22.48	103.1	98.5	100.7	100.4	98.8	98.5	98.3	101.7
A0A0G2JXN8	Osbpl8	Oxysterol-binding protein OS=Rattus norvegicus OX=10116 GN=Osbpl8 PE=1 SV=1	10	7	10	7	888	101.1	6.96	17.34	98.9	99.4	98.8	100.5	102.8	100.1	98.3	101.1
P62268	Rps23	40S ribosomal protein S23 OS=Rattus norvegicus OX=10116 GN=Rps23 PE=1 SV=3	22	4	14	4	143	15.8	10.49	22.86	96.1	96.7	104.9	95.8	99.6	101.6	103.1	102.1
Q63108	Ces1e	Carboxylesterase 1E OS=Rattus norvegicus OX=10116 GN=Ces1e PE=2 SV=1	9	4	20	1	561	61.7	5.99	40.92	101.2	107	118.3	94.5	97.8	98.9	84	98.4
A0A0G2K6A9	Rufy3	Protein RUFY3 OS=Rattus norvegicus OX=10116 GN=Rufy3 PE=1 SV=1	13	8	10	8	637	72	5.35	19.28	99.5	102.4	99.1	104.3	97.7	97.2	98.2	101.7
F7EPH4	Ppa1	Pyrophosphatase (inorganic) 1 OS=Rattus norvegicus OX=10116 GN=Ppa1 PE=1 SV=1	31	8	10	8	289	32.8	5.47	14.7	100.5	97.1	96.4	100	105.4	101.7	101	97.9
Q62920	Pdlim5	PDZ and LIM domain protein 5 OS=Rattus norvegicus OX=10116 GN=Pdlim5 PE=1 SV=2	10	6	11	6	591	63.2	8.38	11.24	87.8	93.7	94.3	95.7	115.9	101	105.1	106.3
F1M1B3	Washc5	WASH complex subunit 5 OS=Rattus norvegicus OX=10116 GN=Washc5 PE=1 SV=2	10	9	9	9	1159	134.1	7.47	17.99	102.2	95.7	101.5	100.1	103.1	97	98.3	102
D4ADF5	Pdcd5	Programmed cell death 5 OS=Rattus norvegicus OX=10116 GN=Pdcd5 PE=1 SV=1	45	5	9	5	125	14.2	5.68	16	101.4	98.1	97	97.6	108.1	102.3	98.1	97.5
M0R776	Mrps36	Mitochondrial ribosomal protein S36 OS=Rattus norvegicus OX=10116 GN=Mrps36 PE=1 SV=1	53	4	10	4	103	11.4	10.35	22.56	99.3	99.7	101	106	103.6	93.9	101.1	95.5
G3V816	Nme3	Nucleoside diphosphate kinase OS=Rattus norvegicus OX=10116 GN=Nme3 PE=1 SV=1	37	6	11	6	169	19.1	6.34	21.68	97.4	99.7	98.6	102.1	98.1	101.6	101.4	101.2
D3ZBS2	Itih3	Inter-alpha-trypsin inhibitor heavy chain H3 OS=Rattus norvegicus OX=10116 GN=Itih3 PE=1 SV=3	9	7	8	7	887	99	6.32	18.67	102.6	104.8	100	105.4	95	98.3	97.8	96.1
B4F7E8	Fam129b	Niban-like protein 1 OS=Rattus norvegicus OX=10116 GN=Fam129b PE=1 SV=1	9	6	8	6	747	84.7	5.95	21.99	94	104.1	98.4	92.6	100.2	102.8	104.9	103
P62243	Rps8	40S ribosomal protein S8 OS=Rattus norvegicus OX=10116 GN=Rps8 PE=1 SV=2	32	5	13	5	208	24.2	10.32	23.21	96.9	104	108.1	97.5	99.5	97.5	98.5	97.9
Q9JLZ1	Glrx3	Glutaredoxin-3 OS=Rattus norvegicus OX=10116 GN=Glrx3 PE=1 SV=2	20	6	9	6	337	37.8	5.72	19.35	96.3	96.8	102.7	104.1	102.2	95.9	102.3	99.5
G3V779	Lad1	Ladinin-1 OS=Rattus norvegicus OX=10116 GN=Lad1 PE=1 SV=1	22	9	10	9	519	57.4	9.7	18.89	91.6	94.1	91.4	97.2	112.9	103.6	104.6	104.5
A0A0G2K3I9	Dusp3	Dual-specificity phosphatase 3 OS=Rattus norvegicus OX=10116 GN=Dusp3 PE=1 SV=1	24	4	9	4	211	23.1	5.85	22.27	98.9	99.4	97.6	99.9	98.9	102.8	101.4	101.2
Q6P9U0	Serpinb6a	Serine (Or cysteine) peptidase inhibitor, clade B, member 6a OS=Rattus norvegicus OX=10116 GN=Serpinb6a PE=1 SV=1	21	6	9	6	379	43	6.1	16.12	99.9	95.8	97	91.8	104.4	103.1	102.9	105.1
Q4FZT0	Stoml2	Stomatin-like protein 2, mitochondrial OS=Rattus norvegicus OX=10116 GN=Stoml2 PE=1 SV=1	18	5	11	5	353	38.4	8.63	25.36	104.3	105.5	101.5	99.6	100.5	97.3	94.1	97.2
G3V6H9	Nap1l1	Nucleosome assembly protein 1-like 1 OS=Rattus norvegicus OX=10116 GN=Nap1l1 PE=1 SV=1	15	4	8	3	391	45.3	4.46	13.35	101.7	93.8	99.2	93.9	102.2	102.9	106.6	99.7
O88656	Arpc1b	Actin-related protein 2/3 complex subunit 1B OS=Rattus norvegicus OX=10116 GN=Arpc1b PE=1 SV=3	22	6	10	6	372	41	8.35	17.39	93	92.1	94.3	94.2	105.6	106.5	108.2	106
P22791	Hmgcs2	Hydroxymethylglutaryl-CoA synthase, mitochondrial OS=Rattus norvegicus OX=10116 GN=Hmgcs2 PE=1 SV=1	13	6	10	6	508	56.9	8.68	21.31	120.2	118	117.9	120.5	78.8	80.5	81.3	82.8
P50233	Hsd11b2	Corticosteroid 11-beta-dehydrogenase isozyme 2 OS=Rattus norvegicus OX=10116 GN=Hsd11b2 PE=1 SV=1	13	5	13	5	400	43.7	9.26	31.93	97	99.7	95	98.2	99.6	103.4	104.1	102.9
B2RYP6	Luc7l2	LUC7-like 2 (S. cerevisiae) OS=Rattus norvegicus OX=10116 GN=Luc7l2 PE=1 SV=1	19	7	10	6	392	46.6	10.1	16.18	104.6	96.7	93.9	95.5	104.4	101.2	103.5	100.2
P43278	H1f0	Histone H1.0 OS=Rattus norvegicus OX=10116 GN=H1f0 PE=2 SV=2	25	5	21	5	194	20.9	10.9	37.8	95.6	91.6	91.7	96.5	106.4	108	106.3	103.9
A0A0G2K7T6	Nup155	Nuclear pore complex protein Nup155 OS=Rattus norvegicus OX=10116 GN=Nup155 PE=1 SV=1	10	8	9	8	1390	155	6.18	12.13	104.5	99.3	100.7	94.6	101.7	95	103.6	100.6
P20611	Acp2	Lysosomal acid phosphatase OS=Rattus norvegicus OX=10116 GN=Acp2 PE=1 SV=1	13	5	8	5	423	48.3	6.64	20.07	98.5	97.8	97	102.5	100.8	100.2	101.6	101.5
Q9EST6	Anp32b	Acidic leucine-rich nuclear phosphoprotein 32 family member B OS=Rattus norvegicus OX=10116 GN=Anp32b PE=1 SV=1	25	7	13	5	272	31	3.99	22.04	104.7	103.9	101.4	97.6	94.7	99.2	102.1	96.3
Q6P7R8	Hsd17b12	Very-long-chain 3-oxoacyl-CoA reductase OS=Rattus norvegicus OX=10116 GN=Hsd17b12 PE=2 SV=1	23	5	8	5	312	34.8	9.67	12.38	97.6	100.4	102.2	96.1	97.8	100.3	101.8	103.8
Q641Z9	Sdhc	Succinate dehydrogenase complex subunit C OS=Rattus norvegicus OX=10116 GN=Sdhc PE=1 SV=1	20	3	13	3	169	18.2	10.21	25.26	100.1	101.6	101.7	99.4	100.2	98.4	100.6	98.1
F1LWE6	Msi2	Musashi RNA-binding protein 2 OS=Rattus norvegicus OX=10116 GN=Msi2 PE=1 SV=3	20	4	8	4	278	29.8	9.17	14.18	97.7	96.7	97	98.7	100.7	101.9	104.4	102.9
F1MAD2	Patj	PATJ, crumbs cell polarity complex component OS=Rattus norvegicus OX=10116 GN=Patj PE=1 SV=2	8	9	9	9	1836	199.3	4.98	11.08	99.3	102.6	101.8	91.6	104.4	101.6	102.9	95.8
P32232	Cbs	Cystathionine beta-synthase OS=Rattus norvegicus OX=10116 GN=Cbs PE=1 SV=3	18	8	11	8	561	61.4	6.48	23.59	99.4	106.8	111.4	103.7	95	92.8	95.4	95.5
P55161	Nckap1	Nck-associated protein 1 OS=Rattus norvegicus OX=10116 GN=Nckap1 PE=2 SV=1	9	9	10	9	1128	128.8	6.61	13.74	99	98.2	110.1	94.8	97.7	100.8	99.7	99.7
F1LQP9	Tnpo1	Transportin 1 OS=Rattus norvegicus OX=10116 GN=Tnpo1 PE=1 SV=3	8	6	8	6	890	101.2	4.96	16.29	90	89.6	107.1	93.6	107.6	104.5	102.3	105.3
Q5BJP9	Phyhd1	Phytanoyl-CoA dioxygenase domain-containing protein 1 OS=Rattus norvegicus OX=10116 GN=Phyhd1 PE=2 SV=1	35	6	9	6	291	32.5	5.83	15.78	100.4	104.8	103.9	100.9	97	97.3	100.3	95.3
Q68FT1	Coq9	Ubiquinone biosynthesis protein COQ9, mitochondrial OS=Rattus norvegicus OX=10116 GN=Coq9 PE=1 SV=2	16	4	8	4	312	35.1	5.77	18.1	102.6	99.2	97.2	101.8	101.2	97.1	100.4	100.7
A0A0G2K865	Tpd52	Tumor protein D52 OS=Rattus norvegicus OX=10116 GN=Tpd52 PE=1 SV=1	18	4	9	4	247	26.9	4.96	18.25	103.2	95.4	91.5	91.9	106.5	106	100.2	105.4
P28494	Man2a1	Alpha-mannosidase 2 OS=Rattus norvegicus OX=10116 GN=Man2a1 PE=1 SV=2	8	8	10	8	1148	131.2	8.32	16.09	104.7	95.4	105.9	95.9	100.9	100	98.5	98.8
D3ZD09	Cox6b1	Cytochrome c oxidase subunit OS=Rattus norvegicus OX=10116 GN=Cox6b1 PE=1 SV=1	45	5	17	5	86	10.1	8.72	34.18	100.3	100.7	100.3	100.8	98.3	100.6	100.1	99.1
Q68FS2	Cops4	COP9 signalosome complex subunit 4 OS=Rattus norvegicus OX=10116 GN=Cops4 PE=1 SV=1	23	6	7	6	406	46.3	5.85	13.6	100.2	103.7	94.9	98.7	101.3	107	97.1	97.2
D3ZM33		Uncharacterized protein OS=Rattus norvegicus OX=10116 PE=3 SV=3	28	5	13	5	152	17.8	10.99	29.33	97.2	94.7	102.7	95	105.6	104.8	100.5	99.4
Q9Z0V5	Prdx4	Peroxiredoxin-4 OS=Rattus norvegicus OX=10116 GN=Prdx4 PE=2 SV=1	30	6	13	4	273	31	6.65	37.41	96.7	95.1	96	99.6	105.2	98	105.7	103.6
D3ZBN0	Hist1h1b	Histone H1.5 OS=Rattus norvegicus OX=10116 GN=Hist1h1b PE=1 SV=1	25	8	21	6	222	22.6	10.96	34.39	95.6	97.1	89.2	94.2	105	106.2	106.7	106
D3Z9D2	Fyco1	FYVE and coiled-coil domain containing 1 (Predicted) OS=Rattus norvegicus OX=10116 GN=Fyco1 PE=1 SV=1	5	5	5	5	1451	163.5	5.07	16.97	103.9	95.5	92.6	97	106.4	106.2	101.6	96.8
Q64537	Capns1	Calpain small subunit 1 OS=Rattus norvegicus OX=10116 GN=Capns1 PE=1 SV=3	30	6	12	6	270	28.6	5.47	22.11	97	92.5	95	95.9	106.4	104.3	102.4	106.6
D3ZRN5	Trove2	TROVE domain family, member 2 OS=Rattus norvegicus OX=10116 GN=Trove2 PE=1 SV=1	17	6	7	6	538	60	8.06	14.28	92.3	98.5	95.9	94.3	105.1	107.2	100.5	106.3
P18422	Psma3	Proteasome subunit alpha type-3 OS=Rattus norvegicus OX=10116 GN=Psma3 PE=1 SV=3	21	6	12	6	255	28.4	5.44	29.56	97.9	100.9	102.1	99.1	102.8	98.9	102.6	95.7
P23928	Cryab	Alpha-crystallin B chain OS=Rattus norvegicus OX=10116 GN=Cryab PE=1 SV=1	25	4	9	4	175	20.1	7.33	15.23	103.4	104.6	102.5	109.8	98.8	95.9	92.7	92.3
D3ZTT7	Sun2	Sad1 and UNC84 domain-containing 2 OS=Rattus norvegicus OX=10116 GN=Sun2 PE=1 SV=1	12	7	8	7	730	81.5	6.87	12.95	98.7	98.5	97.1	98.1	105	100	98.1	104.6
P19686	Gucy1a1	Guanylate cyclase soluble subunit alpha-1 OS=Rattus norvegicus OX=10116 GN=Gucy1a1 PE=1 SV=1	16	8	9	8	690	77.5	7.06	16.95	98.9	92.4	94.5	96.4	109.3	103.7	102.3	102.6
P40112	Psmb3	Proteasome subunit beta type-3 OS=Rattus norvegicus OX=10116 GN=Psmb3 PE=1 SV=1	20	4	7	4	205	22.9	6.55	19.18	95.3	98.3	100.3	92.8	106.1	101.5	103.4	102.3
D4A3E2	Npepl1	Aminopeptidase-like 1 OS=Rattus norvegicus OX=10116 GN=Npepl1 PE=1 SV=2	25	6	7	6	412	43.7	5.68	17.14	106.7	98.7	98.7	99.5	94.4	101.4	97.6	102.9
F1LRB8	Mat2a	S-adenosylmethionine synthase OS=Rattus norvegicus OX=10116 GN=Mat2a PE=1 SV=2	15	6	11	6	395	43.6	6.37	26.49	99.3	99.3	101.9	98.6	99.9	99.2	101.5	100.2
D4AEH3	Psmd7	Proteasome (Prosome, macropain) 26S subunit, non-ATPase, 7 (Predicted) OS=Rattus norvegicus OX=10116 GN=Psmd7 PE=1 SV=1	19	5	9	5	320	36.5	6.81	20.81	98.1	100.1	97.2	97.6	102.5	105	100.8	98.7
P18420	Psma1	Proteasome subunit alpha type-1 OS=Rattus norvegicus OX=10116 GN=Psma1 PE=1 SV=2	26	7	12	7	263	29.5	6.61	27.46	98.9	98.3	98.5	100	102.8	99.6	102	99.8
P08934	Kng1	Kininogen-1 OS=Rattus norvegicus OX=10116 GN=Kng1 PE=2 SV=1	11	7	8	4	639	70.9	6.8	20.97	99.3	100.2	102	101.4	97.9	101.3	98.5	99.4
P46418	Gsta5	Glutathione S-transferase alpha-5 OS=Rattus norvegicus OX=10116 GN=Gsta5 PE=1 SV=2	20	5	20	1	221	25.3	8.43	49.2	107.3	104.7	104.3	106.5	88.1	91.9	98.2	99.1
Q62991	Scfd1	Sec1 family domain-containing protein 1 OS=Rattus norvegicus OX=10116 GN=Scfd1 PE=1 SV=1	10	4	7	4	637	72.2	6.51	21.17	92.5	94.2	95.4	99.2	104.5	101.6	110.4	102.2
Q6MGB8	RT1-A2	RT1 class I, A2 OS=Rattus norvegicus OX=10116 GN=RT1-A2 PE=1 SV=1	16	6	15	5	366	41.4	5.26	26.35	90.8	86.1	90.5	92.2	110.1	112.3	109.4	108.6
Q9EPB1	Dpp7	Dipeptidyl peptidase 2 OS=Rattus norvegicus OX=10116 GN=Dpp7 PE=1 SV=1	10	5	11	5	500	55.1	5.05	26.86	96.5	96.7	98	99.9	103.5	100.7	103.9	100.9
B2RYW3	Ndufb9	NADH dehydrogenase (Ubiquinone) 1 beta subcomplex, 9 OS=Rattus norvegicus OX=10116 GN=Ndufb9 PE=1 SV=1	33	4	11	4	179	21.9	8.07	14.48	100.1	99.9	98.4	98.1	99.5	98.4	101.4	104.3
Q5U3Y8	Btf3	Transcription factor BTF3 OS=Rattus norvegicus OX=10116 GN=Btf3 PE=1 SV=1	46	6	10	5	162	17.7	7.5	12.24	94.1	96.5	96.1	95.6	106.9	104.1	104.4	102.3
O35115	Fhl2	Four and a half LIM domains protein 2 OS=Rattus norvegicus OX=10116 GN=Fhl2 PE=1 SV=1	21	6	10	6	279	32.1	7.3	4.19	93.9	106.5	109.4	96.4	95.4	96.1	100.2	102.2
D3ZJ32	Esyt2	Extended synaptotagmin 2 OS=Rattus norvegicus OX=10116 GN=Esyt2 PE=1 SV=3	11	7	8	7	845	93.9	8.24	17.09	100.3	98.4	105.2	101.1	94.2	96.8	102.1	101.9
A0A0G2K4U6	Ilf3	Interleukin enhancer-binding factor 3 OS=Rattus norvegicus OX=10116 GN=Ilf3 PE=1 SV=1	11	9	12	8	915	98	8.78	15.37	98.6	95.3	98.9	98.5	102.4	107.2	100.6	98.5
P83868	Ptges3	Prostaglandin E synthase 3 OS=Rattus norvegicus OX=10116 GN=Ptges3 PE=1 SV=2	40	6	10	6	160	18.7	4.55	17.97	102.4	97.5	99.8	97.4	100.5	104.8	98	99.6
P52631	Stat3	Signal transducer and activator of transcription 3 OS=Rattus norvegicus OX=10116 GN=Stat3 PE=1 SV=1	8	4	8	4	770	88	6.3	14.88	98.2	95.4	103.6	95.7	103.8	101.2	102.9	99.2
Q66H12	Naga	Alpha-N-acetylgalactosaminidase OS=Rattus norvegicus OX=10116 GN=Naga PE=2 SV=1	20	7	10	7	415	46.8	5.86	19.7	105.3	100.2	110.4	94	99.5	100.4	95.7	94.5
A1L1M0	Prkaca	Protein kinase, cAMP-dependent, catalytic, alpha OS=Rattus norvegicus OX=10116 GN=Prkaca PE=1 SV=1	16	5	11	2	351	40.6	8.79	22.42	98.8	99.4	98.8	95.9	102.5	99.6	102.7	102.4
D3ZPR0	Cse1l	Chromosome segregation 1-like OS=Rattus norvegicus OX=10116 GN=Cse1l PE=1 SV=1	8	6	9	6	971	110.1	5.77	14.86	104.6	95.7	93.1	95.4	99.7	103.3	107.3	100.9
P48199	Crp	C-reactive protein OS=Rattus norvegicus OX=10116 GN=Crp PE=1 SV=1	31	5	11	5	230	25.5	5	21.4	101.1	105.7	106.9	100.6	94.8	101.8	94.3	94.8
P62718	Rpl18a	60S ribosomal protein L18a OS=Rattus norvegicus OX=10116 GN=Rpl18a PE=2 SV=1	19	4	12	4	176	20.7	10.71	29.33	97.6	94	93.5	93.3	105.2	103.4	105.5	107.5
Q66HC5	Nup93	Nuclear pore complex protein Nup93 OS=Rattus norvegicus OX=10116 GN=Nup93 PE=1 SV=1	10	7	8	7	819	93.2	5.72	18.19	103.4	99.3	100.2	99	100.7	97.3	99	101
D3ZRE7	Swap70	SWAP complex protein (Predicted), isoform CRA_b OS=Rattus norvegicus OX=10116 GN=Swap70 PE=1 SV=1	18	9	10	9	585	68.7	6.04	14.56	94.4	96.9	97	101.3	107.7	97	108.8	97
Q07205	Eif5	Eukaryotic translation initiation factor 5 OS=Rattus norvegicus OX=10116 GN=Eif5 PE=1 SV=1	17	6	10	6	429	48.9	5.52	7.98	101.4	90.3	93.5	100.6	109.6	105.4	101.9	97.2
D4A7K5	Atp11a	Phospholipid-transporting ATPase OS=Rattus norvegicus OX=10116 GN=Atp11a PE=1 SV=1	5	6	10	6	1187	135.6	6.57	23.19	121.1	94.9	101.9	101.5	99.2	93.3	94.3	93.9
D3ZDE4	Dguok	Deoxyguanosine kinase OS=Rattus norvegicus OX=10116 GN=Dguok PE=1 SV=1	26	5	7	5	278	32.2	7.96	14.18	104.4	95.3	98.6	96.7	98	100.3	100.5	106.3
B5DFB2	Rbbp4	RB-binding protein 4, chromatin-remodeling factor OS=Rattus norvegicus OX=10116 GN=Rbbp4 PE=1 SV=1	15	5	8	4	425	47.6	4.89	19.71	94.8	98.9	102.4	93.8	105.1	100.8	101.8	102.4
D3ZUC2	Mov10	Mov10 RISC complex RNA helicase OS=Rattus norvegicus OX=10116 GN=Mov10 PE=1 SV=1	10	7	8	7	1004	113.7	9.1	15.29	95.1	103.3	101.6	98.2	99.8	100.5	98.7	102.8
D3ZXF9	Mrpl12	Mitochondrial ribosomal protein L12 OS=Rattus norvegicus OX=10116 GN=Mrpl12 PE=1 SV=1	29	5	9	5	276	29.4	9.66	16.69	101.2	106.8	106.3	91.3	99.7	97.7	95.1	101.9
D4A719	Snx12	Sorting nexin 12 OS=Rattus norvegicus OX=10116 GN=Snx12 PE=1 SV=1	29	5	10	3	170	19.8	8.44	23.39	93.5	97.3	97.1	101.1	103.6	103	101.5	102.9
P63081	Atp6v0c	V-type proton ATPase 16 kDa proteolipid subunit OS=Rattus norvegicus OX=10116 GN=Atp6v0c PE=2 SV=1	12	1	24	1	155	15.8	9.13	37.5	100	102.3	101.9	101.8	96.6	103.7	96.1	97.5
Q5RKH2	Galk1	Galactokinase 1 OS=Rattus norvegicus OX=10116 GN=Galk1 PE=1 SV=1	18	6	7	6	392	42.3	5.35	16.7	100.8	104.2	102.6	96.6	101.5	98.5	98.2	97.6
Q5RKJ9	Rab10	RAB10, member RAS oncogene family OS=Rattus norvegicus OX=10116 GN=Rab10 PE=1 SV=1	20	4	13	2	200	22.5	8.38	36.95	97.7	94.4	99.2	100.8	103.8	95.7	105.1	103.2
Q01129	Dcn	Decorin OS=Rattus norvegicus OX=10116 GN=Dcn PE=1 SV=1	14	5	11	5	354	39.8	8.79	18.77	94.8	99.3	94.5	96.7	105.2	102.6	103.9	102.9
D4A994	Emc1	ER membrane protein complex subunit 1 OS=Rattus norvegicus OX=10116 GN=Emc1 PE=1 SV=1	8	7	9	7	993	111.1	7.31	11.99	100.5	97.5	102.2	99.2	98.5	97.6	100.5	103.9
P63029	Tpt1	Translationally-controlled tumor protein OS=Rattus norvegicus OX=10116 GN=Tpt1 PE=1 SV=1	40	7	9	7	172	19.5	4.86	17.55	90.5	91.7	94.6	92.9	106.5	106.7	110.7	106.5
Q6P7P5	Bzw1	Basic leucine zipper and W2 domain-containing protein 1 OS=Rattus norvegicus OX=10116 GN=Bzw1 PE=1 SV=1	13	6	10	6	419	48	5.92	21.22	97	100.1	101.4	98.6	103.2	101	99.6	99.1
Q5XIM7	Kars	Lysine--tRNA ligase OS=Rattus norvegicus OX=10116 GN=Kars PE=1 SV=1	16	9	11	9	626	71.6	6.6	17.99	94.7	103.4	97.4	101.6	100.4	100.6	98.7	103.3
P63004	Pafah1b1	Platelet-activating factor acetylhydrolase IB subunit alpha OS=Rattus norvegicus OX=10116 GN=Pafah1b1 PE=1 SV=2	27	7	9	7	410	46.6	7.37	16.57	98.6	99.3	103.5	95.2	101.8	101.6	98.7	101.4
Q9EQX9	Ube2n	Ubiquitin-conjugating enzyme E2 N OS=Rattus norvegicus OX=10116 GN=Ube2n PE=1 SV=1	42	6	13	6	152	17.1	6.57	35.13	95.8	99.2	95.4	94.1	103	107.3	103.3	101.9
Q63356	Myo1e	Unconventional myosin-Ie OS=Rattus norvegicus OX=10116 GN=Myo1e PE=1 SV=1	10	10	10	9	1107	126.7	9.07	12.13	96.9	95.4	98.2	96.2	108.2	100.4	102.8	101.9
Q5U1W6	Apool	MICOS complex subunit OS=Rattus norvegicus OX=10116 GN=Apool PE=1 SV=1	24	5	9	5	254	28.2	9.01	14.84	101	97.6	100	98.3	101.5	99.7	102	99.9
Q01579	Gstt1	Glutathione S-transferase theta-1 OS=Rattus norvegicus OX=10116 GN=Gstt1 PE=1 SV=2	19	5	15	5	240	27.5	7.52	34.55	102.8	104.1	103.9	102.5	100.3	95.6	95.9	95
A0A0G2K586	Fabp4	Fatty acid-binding protein, adipocyte OS=Rattus norvegicus OX=10116 GN=Fabp4 PE=1 SV=1	28	5	9	5	149	16.4	9	21.83	101.9	93.1	96.9	95.8	103.7	103.8	102.7	102.1
P35446	Spon1	Spondin-1 OS=Rattus norvegicus OX=10116 GN=Spon1 PE=1 SV=1	13	6	7	6	807	90.7	6.11	14.73	95.9	100.1	99.5	93.1	103.9	101.4	101.8	104.4
P62076	Timm13	Mitochondrial import inner membrane translocase subunit Tim13 OS=Rattus norvegicus OX=10116 GN=Timm13 PE=3 SV=1	52	5	10	5	95	10.5	8.18	26.57	101.4	103.7	100.6	104.5	100.2	96.6	95	98
Q5RJN0	Ndufs7	NADH dehydrogenase (Ubiquinone) Fe-S protein 7 OS=Rattus norvegicus OX=10116 GN=Ndufs7 PE=1 SV=1	17	3	7	3	218	23.9	9.99	21.24	104.8	100.8	98.6	98.2	99.4	98.4	99.1	100.7
F1M9B2	Igfbp7	Insulin-like growth factor binding protein 7, isoform CRA_b OS=Rattus norvegicus OX=10116 GN=Igfbp7 PE=1 SV=2	25	6	8	6	281	28.9	8.12	13.72	90.2	89.7	94.9	93.8	104.5	105.2	110.4	111.2
Q68FU4	Sugct	Succinate--hydroxymethylglutarate CoA-transferase OS=Rattus norvegicus OX=10116 GN=Sugct PE=2 SV=1	15	5	9	5	436	47.5	8.63	20.45	92.1	101.5	93.5	94.6	99.4	114.4	102.2	102.3
Q58FK9	Kyat3	Kynurenine--oxoglutarate transaminase 3 OS=Rattus norvegicus OX=10116 GN=Kyat3 PE=2 SV=1	13	5	11	4	454	51	8.35	17.09	107.4	100.5	101	100	99.7	98.8	96.4	96.2
Q3KRC3	Srpra	SRP receptor subunit alpha OS=Rattus norvegicus OX=10116 GN=Srpra PE=1 SV=1	10	5	7	5	636	69.6	8.95	15.51	92.9	96.1	99.7	99.7	96.6	105.3	98.8	110.9
A0A0G2JZ53	Birc6	Baculoviral IAP repeat-containing 6 OS=Rattus norvegicus OX=10116 GN=Birc6 PE=1 SV=1	2	7	8	7	3993	434	6.19	16.76	100.5	99.8	100.7	99.2	104.3	94.9	99.1	101.5
Q7TPA1	Slc25a15	Ab1-114 OS=Rattus norvegicus OX=10116 GN=Slc25a15 PE=1 SV=1	22	6	9	6	338	36.9	8.97	19.36	100.7	100.7	98.8	102.1	102.4	101.1	97.4	96.8
O35824	Dnaja2	DnaJ homolog subfamily A member 2 OS=Rattus norvegicus OX=10116 GN=Dnaja2 PE=1 SV=1	17	7	12	6	412	45.7	6.48	23.71	101.5	98.6	96	100	100.6	101.7	100.9	100.7
D4A9P7	Bola2	BolA family member 2 OS=Rattus norvegicus OX=10116 GN=Bola2 PE=1 SV=1	71	5	10	5	86	10.2	5.78	19.53	102.1	100.4	97.7	98.1	101.8	98.6	100.5	100.8
Q5RKI8	Abcb8	ATP-binding cassette sub-family B member 8, mitochondrial OS=Rattus norvegicus OX=10116 GN=Abcb8 PE=2 SV=1	12	8	9	8	714	77.7	9.52	16.7	100.4	98.8	103.1	98.7	100.5	97.9	100.3	100.2
P70550	Rab8b	Ras-related protein Rab-8B OS=Rattus norvegicus OX=10116 GN=Rab8b PE=1 SV=1	21	4	11	1	207	23.6	9.07	34.61	89.1	92	93.5	92.4	109.9	107.8	108.4	107
G3V615	Cfb	Complement factor B OS=Rattus norvegicus OX=10116 GN=Cfb PE=1 SV=1	11	8	9	8	763	85.3	6.96	13.65	99.8	103.5	107.3	103	95.4	96.2	101.4	93.6
Q642A7	Fam151a	Protein FAM151A OS=Rattus norvegicus OX=10116 GN=Fam151a PE=2 SV=1	5	3	11	3	608	67.1	6.73	32.57	99.9	99.9	100.3	102.8	96.5	98.1	99.2	103.3
P63086	Mapk1	Mitogen-activated protein kinase 1 OS=Rattus norvegicus OX=10116 GN=Mapk1 PE=1 SV=3	28	9	9	6	358	41.2	6.98	22.31	94.3	96.7	91.6	97.7	107.4	103.9	103.5	104.8
D3ZTH8	LOC689899	Similar to 60S ribosomal protein L23a OS=Rattus norvegicus OX=10116 GN=LOC689899 PE=3 SV=1	31	7	12	7	156	17.7	10.39	17.96	96.1	94.9	93.7	96.1	103.6	106.5	103.1	105.9
Q9ERZ8	Trpv4	Transient receptor potential cation channel subfamily V member 4 OS=Rattus norvegicus OX=10116 GN=Trpv4 PE=1 SV=1	11	6	7	6	871	97.9	7.47	13.9	102.3	109.6	99.3	94.6	97.3	98.4	102.4	96.1
P84100	Rpl19	60S ribosomal protein L19 OS=Rattus norvegicus OX=10116 GN=Rpl19 PE=1 SV=1	22	5	9	5	196	23.5	11.47	20.92	93.3	95.2	101	94.4	105	102	105.1	103.9
F1M3J4	Abcc4	ATP-binding cassette subfamily C member 4 OS=Rattus norvegicus OX=10116 GN=Abcc4 PE=1 SV=3	7	8	8	7	1325	148.8	8.21	11.51	102.4	104.5	102.6	99.4	97.8	99.9	97.2	96.2
Q0D2L2	Mrps22	Mitochondrial ribosomal protein S22 OS=Rattus norvegicus OX=10116 GN=Mrps22 PE=1 SV=1	21	6	8	6	359	41.2	8.31	19.81	97.5	103.1	96.5	97.8	105	99.5	102	98.6
Q5U2X6	Ccdc47	Coiled-coil domain-containing protein 47 OS=Rattus norvegicus OX=10116 GN=Ccdc47 PE=2 SV=1	17	7	8	7	483	55.7	4.84	16.33	98.5	98	94	98.8	103.2	102.7	102.4	102.4
Q62824	Exoc4	Exocyst complex component 4 OS=Rattus norvegicus OX=10116 GN=Exoc4 PE=1 SV=1	10	8	9	8	975	110.5	6.49	16.05	99.3	94.5	101	100.8	101.6	99.3	100.9	102.6
Q99PD6	Tgfb1i1	Transforming growth factor beta-1-induced transcript 1 protein OS=Rattus norvegicus OX=10116 GN=Tgfb1i1 PE=1 SV=2	18	6	7	6	461	50.1	6.92	8.81	95.2	95.3	106.3	96.1	96.2	101.8	107.3	101.8
F7EV94	Bckdha	2-oxoisovalerate dehydrogenase subunit alpha OS=Rattus norvegicus OX=10116 GN=Bckdha PE=1 SV=1	16	6	9	6	464	52.8	8.06	16.3	107.8	106.7	103.5	104.7	97	95	92.3	93
A1A5L1	Blmh	Bleomycin hydrolase OS=Rattus norvegicus OX=10116 GN=Blmh PE=1 SV=1	18	6	7	6	455	52.4	6.38	13.54	97.4	101.8	101.7	97.2	97.3	107.2	98.2	99.3
F1LP76	Elp1	Elongator complex protein 1 OS=Rattus norvegicus OX=10116 GN=Elp1 PE=1 SV=2	8	9	9	9	1331	149.1	6.34	10.58	123.9	96.1	99.1	92.4	100.5	94	96.6	97.4
P13471	Rps14	40S ribosomal protein S14 OS=Rattus norvegicus OX=10116 GN=Rps14 PE=2 SV=3	38	5	11	5	151	16.2	10.05	27.92	97	93.5	96.1	95.7	103.9	106.6	101.8	105.4
O55004	Rnase4	Ribonuclease 4 OS=Rattus norvegicus OX=10116 GN=Rnase4 PE=1 SV=1	28	3	7	3	147	16.9	8.51	18.1	98.3	102.3	100.5	100.7	99.7	103	100	95.5
A0A0G2KAI8	Drg2	Developmentally-regulated GTP-binding protein 2 OS=Rattus norvegicus OX=10116 GN=Drg2 PE=1 SV=1	17	5	8	4	364	40.5	9.35	15.09	103.9	94.9	114	99.8	99.4	97.2	96.4	94.4
P63281	Ube2i	SUMO-conjugating enzyme UBC9 OS=Rattus norvegicus OX=10116 GN=Ube2i PE=1 SV=1	27	5	8	5	158	18	8.66	18.95	100.5	92.8	91.5	90.4	107	102.5	106.5	108.8
P97878	Exoc5	Exocyst complex component 5 OS=Rattus norvegicus OX=10116 GN=Exoc5 PE=1 SV=1	12	7	7	7	708	81.7	6.71	18.31	99.9	97.7	104.4	98.6	97.5	100.7	104.2	97
D3ZDB9	Nmral1	NmrA-like family domain-containing protein 1 OS=Rattus norvegicus OX=10116 GN=Nmral1 PE=1 SV=2	16	4	7	4	305	33.9	6.62	16.42	103.8	101.3	101.5	96	101.9	93.3	100.7	101.4
P38062	Metap2	Methionine aminopeptidase 2 OS=Rattus norvegicus OX=10116 GN=Metap2 PE=1 SV=2	16	5	6	5	478	53	6.02	13.54	98.4	94.5	97.8	90.5	105.6	101.6	110	101.7
D4A1J3	Palm3	Paralemmin 3 OS=Rattus norvegicus OX=10116 GN=Palm3 PE=1 SV=2	13	6	6	6	733	78.5	4.45	13.96	102.2	90.4	100.4	94.5	109.8	112.8	97.9	92.1
A0A0G2K595	Slc23a1	Solute carrier family 23 member 1 OS=Rattus norvegicus OX=10116 GN=Slc23a1 PE=1 SV=1	9	5	12	5	666	72.1	6.76	22.24	107.7	102.1	101.4	102.8	97.7	93.8	95.7	98.8
A0A0G2JZ75	Plvap	Plasmalemma vesicle-associated protein OS=Rattus norvegicus OX=10116 GN=Plvap PE=4 SV=1	14	6	7	6	438	50.1	8.63	18.1	105.1	102.1	100.2	103.9	102.1	98.7	94.5	93.4
B2RYJ7	Actr1b	ARP1 actin-related protein 1 homolog B OS=Rattus norvegicus OX=10116 GN=Actr1b PE=1 SV=1	28	7	9	6	376	42.3	6.4	19.56	98.3	98	97.5	96.9	102.9	103.7	101.1	101.5
D3ZZR9	Fkbp2	Peptidylprolyl isomerase OS=Rattus norvegicus OX=10116 GN=Fkbp2 PE=1 SV=1	49	5	7	5	140	15.4	8.88	12.7	95.5	92.4	95.4	101.9	103.1	103.8	106.8	101
Q62785	Pdap1	28 kDa heat- and acid-stable phosphoprotein OS=Rattus norvegicus OX=10116 GN=Pdap1 PE=1 SV=1	14	4	7	4	181	20.6	7.39	19.13	99.5	98.1	101.9	98.1	100.5	98.8	99.8	103.3
A0A0G2K583	Mtap	S-methyl-5'-thioadenosine phosphorylase OS=Rattus norvegicus OX=10116 GN=Mtap PE=1 SV=1	33	6	7	6	283	31.1	7.18	14.09	92.8	99	98.6	98	106.8	95.3	109.2	100.2
Q5U2P5	C2cd2l	C2CD2-like OS=Rattus norvegicus OX=10116 GN=C2cd2l PE=1 SV=1	10	6	7	6	706	76	7.46	17.53	99.8	100.6	107.6	100.5	98.1	95.1	98.5	99.9
P52555	Erp29	Endoplasmic reticulum resident protein 29 OS=Rattus norvegicus OX=10116 GN=Erp29 PE=1 SV=2	22	5	16	5	260	28.6	6.62	31.2	100.7	90.6	97.5	94.4	104.7	104.3	102.6	105.2
Q63910	Hba-a3	Alpha globin OS=Rattus norvegicus OX=10116 GN=Hba-a3 PE=1 SV=2	23	4	17	2	142	15.5	8.22	35.21	117.1	114.8	114.2	108.4	87.8	84.3	84.3	89.1
F2Z3T7	LOC103694869	Isochorismatase domain-containing protein 1 OS=Rattus norvegicus OX=10116 GN=LOC103694869 PE=1 SV=1	15	3	6	3	297	32	7.39	19.23	103.3	103.5	102.8	103.3	94.8	96.5	98.2	97.7
G3V829	Fubp3	Far upstream element-binding protein 3 OS=Rattus norvegicus OX=10116 GN=Fubp3 PE=1 SV=1	17	8	10	6	569	61.4	8.06	15.58	95.5	102.1	100.3	94.2	103.4	105.2	101	98.2
P10818	Cox6a1	Cytochrome c oxidase subunit 6A1, mitochondrial OS=Rattus norvegicus OX=10116 GN=Cox6a1 PE=1 SV=2	41	2	13	2	111	12.3	9.32	37.24	97.2	107.2	101.4	98.6	96.3	110.2	94.8	94.3
Q32PX6	Rhog	Ras homolog family member G OS=Rattus norvegicus OX=10116 GN=Rhog PE=1 SV=1	35	5	9	4	191	21.3	8.12	20.03	99.8	99.8	97	95.8	102.2	102.1	100.6	102.7
F7EXQ7	Ndufa8	NADH dehydrogenase [ubiquinone] 1 alpha subcomplex subunit 8 OS=Rattus norvegicus OX=10116 GN=Ndufa8 PE=1 SV=1	22	4	11	4	190	22.1	8.28	14.57	100.5	100.6	100.3	102.3	99.4	101.1	96.8	99.1
Q62733	Tmpo	Lamina-associated polypeptide 2, isoform beta OS=Rattus norvegicus OX=10116 GN=Tmpo PE=1 SV=3	23	6	8	6	452	50.2	9.39	14.11	95.8	94.7	93.8	99	107.7	99.5	105.9	103.6
Q5HZV9	Ppp1r7	Protein phosphatase 1 regulatory subunit 7 OS=Rattus norvegicus OX=10116 GN=Ppp1r7 PE=1 SV=1	19	5	9	5	360	41.3	4.92	12.21	94.7	110.1	110.7	96.3	101.3	97.5	96.8	92.7
P39069	Ak1	Adenylate kinase isoenzyme 1 OS=Rattus norvegicus OX=10116 GN=Ak1 PE=1 SV=3	18	3	9	3	194	21.6	7.9	15.08	98.5	95	98.6	100.9	101	102.7	101	102.3
B5DF89	Cul3	Cullin-3 OS=Rattus norvegicus OX=10116 GN=Cul3 PE=1 SV=2	9	6	7	6	768	88.9	8.48	16.63	104.5	100.1	99	94.3	107.2	97.8	96	101.1
E9PU01	Chd4	Chromodomain helicase DNA-binding protein 4 OS=Rattus norvegicus OX=10116 GN=Chd4 PE=1 SV=3	4	5	8	5	1921	218	5.81	16.31	95.7	97.7	96.9	89.5	106.6	104.8	106	102.8
A0A1W2Q631	Rps16	40S ribosomal protein S16 OS=Rattus norvegicus OX=10116 GN=Rps16 PE=1 SV=1	25	4	13	4	150	16.8	10.45	31.93	95.7	94.7	96.8	94.1	102.6	104.5	104.6	107.1
D3ZTV0	Fermt1	Fermitin family member 1 OS=Rattus norvegicus OX=10116 GN=Fermt1 PE=4 SV=1	13	7	8	6	677	77	6.38	13.01	104.5	100.3	101.6	97.7	98.8	98.9	100.1	98
B2RYT7	Hdhd3	Haloacid dehalogenase-like hydrolase domain-containing 3 OS=Rattus norvegicus OX=10116 GN=Hdhd3 PE=1 SV=1	27	5	7	5	251	27.8	7.01	15.22	103.2	103.9	103.8	103.6	96.2	97	97.8	94.5
Q75Q39	Tomm70	Mitochondrial import receptor subunit TOM70 OS=Rattus norvegicus OX=10116 GN=Tomm70 PE=1 SV=1	15	9	10	9	610	67.4	7.5	19.6	93	95.5	94.2	98.2	103.9	104.6	103.9	106.7
P04166	Cyb5b	Cytochrome b5 type B OS=Rattus norvegicus OX=10116 GN=Cyb5b PE=1 SV=2	32	2	4	2	146	16.3	5.06	17	101.7	113.2	114.8	93.3	95.7	93.1	94.6	93.6
D4A3K5	Hist1h1a	Histone H1.1 OS=Rattus norvegicus OX=10116 GN=Hist1h1a PE=1 SV=1	21	4	11	2	214	22	10.99	25.45	90.4	95.1	100.3	96.8	105.5	102.4	106.4	103.2
Q9R1T1	Banf1	Barrier-to-autointegration factor OS=Rattus norvegicus OX=10116 GN=Banf1 PE=1 SV=1	48	3	9	3	89	10	6.09	16.9	89.4	97.4	82.4	91.8	112.4	106.1	107.2	113.3
G3V6B0	Pdxdc1	Pyridoxal-dependent decarboxylase domain-containing 1 OS=Rattus norvegicus OX=10116 GN=Pdxdc1 PE=1 SV=1	12	7	8	7	785	86.9	5.53	15.57	97.3	98.1	102.4	92.9	103.8	101.9	102.4	101.2
D4AE96	Ipo7	Importin 7 OS=Rattus norvegicus OX=10116 GN=Ipo7 PE=1 SV=1	11	7	8	7	1038	119.4	4.82	8.94	98.7	99.8	93.4	102.1	107.3	101.3	95.3	102
A0A0G2JXP3	Nedd4l	Neural precursor cell-expressed, developmentally down-regulated 4-like, E3 ubiquitin protein ligase OS=Rattus norvegicus OX=10116 GN=Nedd4l PE=1 SV=1	8	7	10	4	961	110.6	6.09	13.06	104.8	103.1	93.1	92.7	100.1	108.1	99.1	99
A0A0G2JVP8	Gba3	Glucosylceramidase beta 3 OS=Rattus norvegicus OX=10116 GN=Gba3 PE=3 SV=1	16	7	11	4	421	48.5	5.62	20.37	108.3	104.3	103.6	111	94	91.5	95.1	92.2
O70597	Pex11a	Peroxisomal membrane protein 11A OS=Rattus norvegicus OX=10116 GN=Pex11a PE=1 SV=1	21	4	5	4	246	27.9	9.76	15.31	113.4	104	109	107.1	101.7	87.9	89.8	87
Q80W57	Abcg2	ATP-binding cassette sub-family G member 2 OS=Rattus norvegicus OX=10116 GN=Abcg2 PE=1 SV=1	9	6	8	6	657	72.9	9.11	12.92	99.3	101.7	101.9	102.2	97.9	99.3	96.9	100.8
Q7TSA0	Rhot2	Mitochondrial Rho GTPase 2 OS=Rattus norvegicus OX=10116 GN=Rhot2 PE=1 SV=1	10	5	8	4	622	69.1	5.71	15.41	99.4	100.8	101.1	97.7	96.6	103.9	97.4	103.1
G3V702	Smu1	Smu-1 suppressor of mec-8 and unc-52 homolog (C. elegans) OS=Rattus norvegicus OX=10116 GN=Smu1 PE=1 SV=1	18	8	10	8	513	57.5	7.18	10.15	100.9	106	100.4	94.5	101.8	99.8	97.7	98.9
P59215	Gnao1	Guanine nucleotide-binding protein G(o) subunit alpha OS=Rattus norvegicus OX=10116 GN=Gnao1 PE=1 SV=2	14	4	9	2	354	40	5.53	20.6	114.2	92.4	105.8	95.7	98.6	94.4	98.4	100.4
F1LYQ8	Farp1	FERM, ARHGEF and pleckstrin domain-containing protein 1 OS=Rattus norvegicus OX=10116 GN=Farp1 PE=1 SV=2	8	6	7	6	1049	118.8	7.96	11.65	88.3	90.1	92.9	96.7	120.3	104.9	103.3	103.5
B2RZD6	Ndufa4	NDUFA4, mitochondrial complex-associated OS=Rattus norvegicus OX=10116 GN=Ndufa4 PE=1 SV=1	34	4	27	4	82	9.3	9.52	55.18	102.5	101.7	101.4	103.1	98.6	96.6	98.6	97.5
M0R9L3	Snx9	Sorting nexin OS=Rattus norvegicus OX=10116 GN=Snx9 PE=1 SV=2	11	5	7	5	593	66	6.49	16.1	96.3	97.7	96.6	97	98.9	104.7	109.6	99.2
D3ZVD8	LOC108348065	Histone deacetylase OS=Rattus norvegicus OX=10116 GN=LOC108348065 PE=1 SV=2	8	7	8	7	1155	125.8	5.86	17.13	102.1	100.9	103	102.1	100.9	95.9	97.8	97.3
F1LMV6	Dsp	Desmoplakin OS=Rattus norvegicus OX=10116 GN=Dsp PE=1 SV=1	3	7	7	7	2877	332.2	6.83	14.4	97.6	98.8	98.2	95.4	103.6	100.1	100.4	106
G3V8L1	Pycard	PYD and CARD domain-containing OS=Rattus norvegicus OX=10116 GN=Pycard PE=1 SV=1	45	6	7	6	193	21.7	5.27	15.71	96	97.7	97.5	94.1	105.8	100.2	106.5	102.2
P97584	Ptgr1	Prostaglandin reductase 1 OS=Rattus norvegicus OX=10116 GN=Ptgr1 PE=2 SV=3	22	6	7	6	329	35.7	8.02	16.15	99.8	94.9	99.6	97.6	100.3	100.8	103.8	103.1
G3V8Y8	Hip1	Huntingtin interacting protein 1, isoform CRA_a OS=Rattus norvegicus OX=10116 GN=Hip1 PE=1 SV=1	11	8	8	8	1030	114.9	5.41	12.07	100.8	94.6	96.7	100.3	106	93	102.7	106
Q6DGG1	Abhd14b	Protein ABHD14B OS=Rattus norvegicus OX=10116 GN=Abhd14b PE=2 SV=1	31	5	12	5	210	22.6	6.01	21.38	103.4	105.8	102.8	101	97.1	97.3	95.7	96.9
P18395	Csde1	Cold shock domain-containing protein E1 OS=Rattus norvegicus OX=10116 GN=Csde1 PE=2 SV=1	7	4	6	4	798	88.8	6.37	15.49	99.8	94.8	98	94.9	102.1	98.9	104.2	107.2
Q66H68	Rbm47	RNA-binding protein 47 OS=Rattus norvegicus OX=10116 GN=Rbm47 PE=2 SV=1	10	5	8	4	590	64.1	8.19	16	97.5	100.6	98.4	101.3	100	94.7	102.6	104.8
Q3MHT2	Nfs1	Cysteine desulfurase, mitochondrial OS=Rattus norvegicus OX=10116 GN=Nfs1 PE=1 SV=1	22	7	11	7	459	50.6	8.6	22.3	100.7	104	100.8	99	98.7	99.4	98.2	99.3
D4A9N5	Trim25	Tripartite motif-containing 25 OS=Rattus norvegicus OX=10116 GN=Trim25 PE=1 SV=3	13	6	8	6	643	71.9	8.28	13.58	94.3	96.7	93.2	98.8	104.6	100.5	105.9	106.1
Q6Q7Y5	Gna13	Guanine nucleotide-binding protein subunit alpha-13 OS=Rattus norvegicus OX=10116 GN=Gna13 PE=1 SV=1	17	6	10	4	377	44	8.21	25.56	98.8	104.5	101.2	95.2	102.1	99.3	101.4	97.5
Q62658	Fkbp1a	Peptidyl-prolyl cis-trans isomerase FKBP1A OS=Rattus norvegicus OX=10116 GN=Fkbp1a PE=1 SV=3	28	2	6	2	108	11.9	8.16	10.32	91.3	99.5	104	94.6	107.2	104.2	100.7	98.7
Q9WU49	Carhsp1	Calcium-regulated heat stable protein 1 OS=Rattus norvegicus OX=10116 GN=Carhsp1 PE=1 SV=1	18	2	7	2	147	15.9	8.21	26.46	94.2	97.3	94.2	92.3	107.2	107.6	104.7	102.4
Q5PQM2	Klc4	Kinesin light chain 4 OS=Rattus norvegicus OX=10116 GN=Klc4 PE=1 SV=1	11	7	7	5	619	68.9	6.25	12.21	99.3	100.1	99.9	97.8	101.4	99.9	98.9	102.7
Q56R17	Kpna4	Importin subunit alpha OS=Rattus norvegicus OX=10116 GN=Kpna4 PE=1 SV=1	16	5	5	3	521	57.9	4.94	12.7	98.2	99.9	99	97.4	106.4	100.2	97.6	101.3
D3ZQ59	Nrdc	Nardilysin OS=Rattus norvegicus OX=10116 GN=Nrdc PE=1 SV=1	7	7	8	7	1229	140.6	4.91	12.92	100.1	102.6	103.2	100.3	102	94.5	100.9	96.6
P29314	Rps9	40S ribosomal protein S9 OS=Rattus norvegicus OX=10116 GN=Rps9 PE=1 SV=4	27	7	11	7	194	22.6	10.65	23.18	97.1	95.5	95.7	97	103.1	106.7	104.2	100.9
D4A3P1	Ubqln4	Ubiquilin 4 OS=Rattus norvegicus OX=10116 GN=Ubqln4 PE=1 SV=1	10	4	6	2	595	63.5	5.03	14.11	108.6	95	102.5	93.2	99	96.6	101.9	103.1
A0A0G2K7G7	Sept8	Septin-8 OS=Rattus norvegicus OX=10116 GN=Sept8 PE=1 SV=1	17	6	12	3	483	55.8	6.1	27.63	94.8	96.8	99.9	97.8	101.1	102.2	105.2	102.2
P10687	Plcb1	1-phosphatidylinositol 4,5-bisphosphate phosphodiesterase beta-1 OS=Rattus norvegicus OX=10116 GN=Plcb1 PE=1 SV=1	4	4	6	4	1216	138.3	6.18	10.52	102	96.1	101.5	94.8	107.4	101.3	101.5	95.3
G3V6P8	Gng12	Guanine nucleotide-binding protein subunit gamma OS=Rattus norvegicus OX=10116 GN=Gng12 PE=1 SV=1	57	3	10	3	72	8	8.97	27.77	101.3	108.9	103.6	99.7	95.1	101.1	94.1	96.3
Q5RKG9	Eif4b	Eukaryotic translation initiation factor 4B OS=Rattus norvegicus OX=10116 GN=Eif4b PE=1 SV=1	12	6	9	6	611	69	5.81	18.38	100.4	94.9	96	93	101.9	108.3	101.7	103.8
A0A096MJ11	Gsdmd	Gasdermin D OS=Rattus norvegicus OX=10116 GN=Gsdmd PE=1 SV=1	13	6	8	6	488	53.2	4.93	13.64	96.6	92.8	96.4	93.9	110.2	99.5	104.1	106.4
D4A8F2	Rsu1	Ras suppressor protein 1 OS=Rattus norvegicus OX=10116 GN=Rsu1 PE=1 SV=3	21	6	12	6	277	31.3	7.96	20.96	102.3	98.5	100.3	96.1	99.8	102.6	96.8	103.4
F1MAG0	Gsdme	Gasdermin-E Gasdermin-E, N-terminal Gasdermin-E, C-terminal OS=Rattus norvegicus OX=10116 GN=Gsdme PE=4 SV=3	14	5	7	5	513	56.8	6.09	17.77	101.2	101.5	99.9	95.8	100	102.2	97.7	101.6
G3V913	Hspb1	Heat shock 27kDa protein 1 OS=Rattus norvegicus OX=10116 GN=Hspb1 PE=1 SV=1	27	5	9	5	206	22.8	6.21	18.91	96.9	99	95.6	92.9	103.5	102.6	104.7	104.9
P08644	Kras	GTPase KRas OS=Rattus norvegicus OX=10116 GN=Kras PE=1 SV=3	26	4	6	2	189	21.6	6.77	11.54	95.7	96.6	94.5	102.3	105.3	98.4	102.5	104.8
D3ZS58	Ndufa2	NADH dehydrogenase [ubiquinone] 1 alpha subcomplex subunit 2 OS=Rattus norvegicus OX=10116 GN=Ndufa2 PE=1 SV=1	35	3	10	3	97	10.8	9.72	23.36	104	103.6	104.3	104.1	96.7	95.2	95.3	96.8
A0A0G2K777	Rhot1	Ras homolog family member T1 OS=Rattus norvegicus OX=10116 GN=Rhot1 PE=1 SV=1	9	6	8	5	752	86	6.79	12.9	97.8	101.6	113	100.9	96.7	97.3	95.2	97.6
G3V9T9	Ptpn6	Tyrosine-protein phosphatase non-receptor type OS=Rattus norvegicus OX=10116 GN=Ptpn6 PE=1 SV=1	11	6	8	6	613	69.6	7.75	21.04	93.1	93.8	99.2	97.9	103.3	102.6	107.6	102.6
Q5BJP4	Rbm39	RNA-binding motif protein 39 OS=Rattus norvegicus OX=10116 GN=Rbm39 PE=1 SV=1	14	6	7	6	524	58.6	10.13	13.37	97.1	95.5	105.1	94.2	99.7	102.2	104	102.3
Q6PCT3	Tpd52l2	Tumor protein D54 OS=Rattus norvegicus OX=10116 GN=Tpd52l2 PE=1 SV=1	37	7	7	7	220	24	6.15	18.69	98.9	97.5	98	96.6	100.6	102.6	100.6	105.1
D3ZZC1	Txndc5	RCG43947 OS=Rattus norvegicus OX=10116 GN=Txndc5 PE=1 SV=1	20	6	10	6	417	46.3	5.88	24.88	96.7	96.8	97.9	97.9	106.5	97.5	106	100.7
A0A0G2K3G0	Hrg	Histidine-rich glycoprotein OS=Rattus norvegicus OX=10116 GN=Hrg PE=1 SV=1	14	8	10	8	536	60.3	7.83	14.17	103.8	95.4	95	95.5	105.3	101.9	100.6	102.6
A0A0H2UHH0	Miox	Inositol oxygenase OS=Rattus norvegicus OX=10116 GN=Miox PE=1 SV=1	18	4	7	4	289	33.6	5.63	13.72	102.5	103.3	94.2	103.5	97.7	97.4	98.9	102.4
P05370	G6pdx	Glucose-6-phosphate 1-dehydrogenase OS=Rattus norvegicus OX=10116 GN=G6pdx PE=1 SV=3	12	7	11	7	515	59.3	6.38	20.67	95.7	95.7	101.3	98.3	100.8	102	103.5	102.7
P05508	Mtnd4	NADH-ubiquinone oxidoreductase chain 4 OS=Rattus norvegicus OX=10116 GN=Mtnd4 PE=3 SV=3	9	3	9	3	459	51.7	9.41	25.25	106.6	104.4	106.5	100	97	94	94	97.6
P62853	Rps25	40S ribosomal protein S25 OS=Rattus norvegicus OX=10116 GN=Rps25 PE=2 SV=1	36	6	13	6	125	13.7	10.11	27.08	93.4	94.8	95.2	95.2	105.6	106.2	105.9	103.7
A0A0G2K761	Cul2	Cullin 2 OS=Rattus norvegicus OX=10116 GN=Cul2 PE=1 SV=1	7	5	7	5	745	86.9	7.12	17.41	101.3	102.2	100	98.7	99.8	100.1	98	99.8
D3ZAN2	Cdhr2	Cadherin-related family member 2 OS=Rattus norvegicus OX=10116 GN=Cdhr2 PE=1 SV=1	5	6	8	6	1310	143.1	4.44	19.18	107.1	97.7	102.4	99.6	100.8	97.5	96.8	98.2
Q3B8Q2	Eif4a3	Eukaryotic initiation factor 4A-III OS=Rattus norvegicus OX=10116 GN=Eif4a3 PE=1 SV=1	15	6	7	5	411	46.8	6.73	13.59	94.6	92.3	91.1	100.6	105.2	105	103.5	107.7
B0LT89	Stk24	Serine/threonine-protein kinase 24 OS=Rattus norvegicus OX=10116 GN=Stk24 PE=2 SV=1	11	3	5	1	431	48	5.43	11.98	87.6	107.9	114.1	107.7	91.3	95.9	104	91.4
Q6AXS3	Dek	Protein DEK OS=Rattus norvegicus OX=10116 GN=Dek PE=1 SV=1	21	8	8	8	378	42.9	7.69	14.49	98.5	96.2	89.5	95.4	108.9	104.5	102.3	104.8
Q5U2U3	Parp3	Poly [ADP-ribose] polymerase OS=Rattus norvegicus OX=10116 GN=Parp3 PE=1 SV=1	12	5	8	5	526	58.8	7.68	14.34	100.9	100	100.8	94	97.1	104.7	102.6	99.9
Q9JHB5	Tsnax	Translin-associated protein X OS=Rattus norvegicus OX=10116 GN=Tsnax PE=1 SV=1	25	6	8	6	290	33	6.55	9.52	93.3	98.9	103.2	93.2	103.5	100	102.6	105.2
D3Z9Z0	Ank1	Ankyrin 1 OS=Rattus norvegicus OX=10116 GN=Ank1 PE=1 SV=1	6	8	9	6	1707	187	6.7	8.7	108.1	109.5	106.3	108.8	90.7	89.5	92	95
Q923W4	Hdgfl3	Hepatoma-derived growth factor-related protein 3 OS=Rattus norvegicus OX=10116 GN=Hdgfl3 PE=1 SV=1	20	4	7	4	202	22.4	8.4	8.37	97.4	99.1	94.7	94.6	102.4	101.8	103.1	106.9
P27008	Parp1	Poly [ADP-ribose] polymerase 1 OS=Rattus norvegicus OX=10116 GN=Parp1 PE=1 SV=4	9	6	9	6	1014	112.6	8.97	12.68	103.9	101.5	110.6	91.9	97.5	94.2	100.8	99.5
D3ZI16	Cops6	COP9 (Constitutive photomorphogenic) homolog, subunit 6 (Arabidopsis thaliana) (Predicted), isoform CRA_a OS=Rattus norvegicus OX=10116 GN=Cops6 PE=1 SV=1	22	5	7	5	344	37.7	6.14	18.99	98.2	106.5	98.1	98.3	102.5	95.6	95.8	104.8
Q5BK81	Ptgr2	Prostaglandin reductase 2 OS=Rattus norvegicus OX=10116 GN=Ptgr2 PE=2 SV=2	14	5	10	5	351	38.1	5.54	22.73	106	102.1	102.4	100.2	97	101.4	96.9	94
Q4FZT2	Ppme1	Protein phosphatase methylesterase 1 OS=Rattus norvegicus OX=10116 GN=Ppme1 PE=1 SV=2	20	6	7	6	386	42.3	5.97	10.03	94	98	104.8	100.1	100.4	102.7	96.2	103.7
F1LMQ3	Psmd8	Proteasome 26S subunit, non-ATPase 8 OS=Rattus norvegicus OX=10116 GN=Psmd8 PE=1 SV=1	16	5	9	5	353	39.9	9.54	14.02	95.7	111.8	106.7	93.7	100.1	96.3	97.1	98.5
Z4YNF4	Acp1	Low molecular weight phosphotyrosine protein phosphatase OS=Rattus norvegicus OX=10116 GN=Acp1 PE=1 SV=2	22	4	7	4	159	18.2	6.32	16.47	107.5	98.6	105.9	104.3	100.7	95.7	99.8	87.6
Q4KLH4	Pspc1	Paraspeckle component 1 OS=Rattus norvegicus OX=10116 GN=Pspc1 PE=1 SV=1	11	4	6	4	522	58.7	6.67	16.75	94	96.7	96.8	95.6	107.6	102	105.4	101.9
D3ZXK4	Abhd11	Abhydrolase domain-containing 11 OS=Rattus norvegicus OX=10116 GN=Abhd11 PE=1 SV=1	17	4	7	4	307	33.2	9.31	18.32	96	106.9	107.1	99.5	100	100.9	99.3	90.3
Q8K4F7	Dcps	m7GpppX diphosphatase OS=Rattus norvegicus OX=10116 GN=Dcps PE=2 SV=1	19	4	6	4	336	38.7	6.48	14.99	102.9	95.5	99.5	94.9	103.9	105.7	99.1	98.5
P61203	Cops2	COP9 signalosome complex subunit 2 OS=Rattus norvegicus OX=10116 GN=Cops2 PE=1 SV=1	15	5	7	5	443	51.6	5.53	14.47	96.9	105.1	101.5	101.5	98	102	96.1	98.9
Q7TP52	Cmbl	Carboxymethylenebutenolidase homolog OS=Rattus norvegicus OX=10116 GN=Cmbl PE=2 SV=1	27	6	16	6	245	27.9	6.71	24.82	101	108.1	103.6	102.9	96.8	99.1	95.3	93.2
F7F469	Igtp	Interferon gamma-induced GTPase OS=Rattus norvegicus OX=10116 GN=Igtp PE=1 SV=2	7	7	8	7	1388	157	6.24	9.9	95.2	94.5	104.8	89.9	108	105.6	103.5	98.4
Q4V8N0	Tinagl1	Lipocalin 7, isoform CRA_a OS=Rattus norvegicus OX=10116 GN=Tinagl1 PE=1 SV=1	14	5	7	5	467	52.7	6.86	15.39	104.8	105.3	103.2	95.2	100.8	94.5	100.2	96
G3V7Y3	Atp5f1d	ATP synthase subunit delta, mitochondrial OS=Rattus norvegicus OX=10116 GN=Atp5f1d PE=1 SV=1	38	3	9	3	168	17.6	5.24	23.95	97.8	98	97.8	100	100.8	99.5	103	103
D3ZJX5	Timm50	RCG54610, isoform CRA_a OS=Rattus norvegicus OX=10116 GN=Timm50 PE=1 SV=2	22	6	9	6	353	39.8	8.13	22.21	104.8	99.3	97.6	100.9	97.8	98.4	98.5	102.7
P21708	Mapk3	Mitogen-activated protein kinase 3 OS=Rattus norvegicus OX=10116 GN=Mapk3 PE=1 SV=5	25	8	8	5	380	43.1	6.61	21.53	99.8	105.8	92.8	95.4	99.9	107	99.4	99.9
A0A0G2K5E6	LOC108351936	60S ribosomal protein L30-like OS=Rattus norvegicus OX=10116 GN=LOC108351936 PE=4 SV=1	30	3	7	3	115	12.8	9.88	20.75	93.3	99.5	101.7	96	105	102.1	101	101.4
Q62952	Dpysl3	Dihydropyrimidinase-related protein 3 OS=Rattus norvegicus OX=10116 GN=Dpysl3 PE=1 SV=2	12	6	7	4	570	61.9	6.49	18.78	91.4	97	91.7	87.2	111.2	107.3	109	105.3
G3V637	Stxbp2	Syntaxin binding protein 2, isoform CRA_b OS=Rattus norvegicus OX=10116 GN=Stxbp2 PE=1 SV=1	13	5	10	5	594	66.6	6.77	11.78	101	100.2	97.1	98.2	103.3	95.9	102.7	101.6
F1LMM8	Pdk2	[Pyruvate dehydrogenase (acetyl-transferring)] kinase isozyme 2, mitochondrial OS=Rattus norvegicus OX=10116 GN=Pdk2 PE=1 SV=3	22	7	8	6	407	46.2	7.36	8.77	100.6	101.1	103.8	103.3	96	98.4	98.8	97.9
Q66HG4	Galm	Aldose 1-epimerase OS=Rattus norvegicus OX=10116 GN=Galm PE=1 SV=1	18	5	11	5	342	37.9	6.65	20.46	106.7	106.5	101.2	104.4	95.5	95.9	96.1	93.7
P14562	Lamp1	Lysosome-associated membrane glycoprotein 1 OS=Rattus norvegicus OX=10116 GN=Lamp1 PE=1 SV=1	14	5	13	5	407	43.9	8.07	22.38	99.9	100.5	97.3	99.6	101.6	101	100.7	99.4
A0A0G2QC02	Skiv2l	Ski2-like RNA helicase OS=Rattus norvegicus OX=10116 GN=Skiv2l PE=1 SV=1	9	6	6	6	1244	137.2	6.38	14.23	98.9	98.8	98.5	100	105.5	98.2	99.6	100.5
M0RBA8	Eng	Endoglin OS=Rattus norvegicus OX=10116 GN=Eng PE=1 SV=2	13	8	8	8	699	74.9	6.27	14.6	100.4	98.3	98.9	92	103.7	99.7	106.3	100.6
Q9EPT8	Clic5	Chloride intracellular channel protein 5 OS=Rattus norvegicus OX=10116 GN=Clic5 PE=1 SV=1	23	5	7	5	251	28.3	5.94	7.92	101	99.7	105	106.4	103.7	92.2	95.8	96.2
P50430	Arsb	Arylsulfatase B OS=Rattus norvegicus OX=10116 GN=Arsb PE=2 SV=2	13	7	9	7	528	58.9	6.6	19.94	96.1	99.8	100.4	97.5	101.6	104.9	99.9	99.8
B0BNG3	Lman2	Lectin, mannose-binding 2 OS=Rattus norvegicus OX=10116 GN=Lman2 PE=1 SV=1	22	7	9	7	358	40.4	6.95	11.18	95.4	97.9	99.6	99.7	99.8	100.1	103.6	104
Q66HG5	Tm9sf2	Transmembrane 9 superfamily member 2 OS=Rattus norvegicus OX=10116 GN=Tm9sf2 PE=2 SV=1	9	5	7	5	663	75.5	7.44	10.98	95.1	93.1	105.9	97.7	102.3	100.8	102	103.2
Q01986	Map2k1	Dual specificity mitogen-activated protein kinase kinase 1 OS=Rattus norvegicus OX=10116 GN=Map2k1 PE=1 SV=2	24	7	10	4	393	43.4	6.62	14.92	96.7	95.7	101.5	95.5	105.7	103.6	102.9	98.4
D4AE56	Ptges2	Prostaglandin E synthase 2 OS=Rattus norvegicus OX=10116 GN=Ptges2 PE=1 SV=1	18	4	5	4	384	43.4	9.25	14.03	104.1	101	100	99.8	92.9	96.2	100.3	105.8
M0R3M4	Ranbp2	RAN-binding protein 2 OS=Rattus norvegicus OX=10116 GN=Ranbp2 PE=1 SV=1	3	8	8	8	3088	344.2	6.02	10.65	103.8	104.1	99.7	94.8	98.8	102.5	101.4	94.9
Q5M860	Arhgdib	Rho GDP dissociation inhibitor beta OS=Rattus norvegicus OX=10116 GN=Arhgdib PE=1 SV=1	26	4	8	4	200	22.9	5.11	21.03	90.6	89.8	90.1	92	107.7	112.3	108	109.4
F7EPE0	Psap	Prosaposin OS=Rattus norvegicus OX=10116 GN=Psap PE=1 SV=2	10	5	8	5	557	61.4	5.2	19.53	97.2	92	93.7	93.6	106.7	105	103.6	108.2
F1LSM0	Usp24	Ubiquitin-specific peptidase 24 OS=Rattus norvegicus OX=10116 GN=Usp24 PE=1 SV=2	3	7	8	6	2617	293.8	6.14	12.62	105.4	101.7	105.3	98.9	93.5	99.8	97.4	98.1
D3ZZ21	Ndufb6	NADH dehydrogenase (Ubiquinone) 1 beta subcomplex, 6 (Predicted) OS=Rattus norvegicus OX=10116 GN=Ndufb6 PE=1 SV=1	30	4	12	4	128	15.6	10.04	27.62	103.2	104.1	105.9	99.6	94.8	98.8	97.7	95.8
Q9WUC4	Atox1	Copper transport protein ATOX1 OS=Rattus norvegicus OX=10116 GN=Atox1 PE=1 SV=1	47	3	5	3	68	7.3	7.24	15.9	99.7	91.7	101.8	100.9	101.5	104.2	101.3	99
P61459	Pcbd1	Pterin-4-alpha-carbinolamine dehydratase OS=Rattus norvegicus OX=10116 GN=Pcbd1 PE=1 SV=2	58	6	9	5	104	12	6.8	14.35	97.3	96.6	100.1	106	100.9	100.6	100.8	97.7
P18297	Spr	Sepiapterin reductase OS=Rattus norvegicus OX=10116 GN=Spr PE=1 SV=1	20	4	9	4	262	28.1	5.71	17.82	102.2	100.8	100.7	104.7	96.8	94.8	99.6	100.4
P22509	Fbl	rRNA 2'-O-methyltransferase fibrillarin OS=Rattus norvegicus OX=10116 GN=Fbl PE=1 SV=2	22	6	9	6	327	34.2	10.24	23.72	98.5	98.7	97.5	99	106.7	98.7	100.1	100.8
D3ZJ08	Hist2h3c2	Histone H3 OS=Rattus norvegicus OX=10116 GN=Hist2h3c2 PE=1 SV=1	51	6	26	2	136	15.4	11.27	45.55	91.6	89.7	89.3	93.5	106.7	109	108.7	111.5
G3V886	LOC108348078	ATP-dependent zinc metalloprotease YME1L1 OS=Rattus norvegicus OX=10116 GN=LOC108348078 PE=1 SV=1	10	5	5	5	715	79.7	8.9	8.62	108	108.8	116.8	93	95.6	88.6	97.2	92
Q5M819	Psph	Phosphoserine phosphatase OS=Rattus norvegicus OX=10116 GN=Psph PE=2 SV=1	18	4	7	4	225	25	5.67	18.48	98.5	99.4	99.3	97.2	102.4	101	99.4	102.9
Q641Z8	Pef1	Peflin OS=Rattus norvegicus OX=10116 GN=Pef1 PE=2 SV=1	18	4	7	4	283	30	6.07	14.6	93.5	96.2	101	90.9	104	107.9	101.9	104.6
P97521	Slc25a20	Mitochondrial carnitine/acylcarnitine carrier protein OS=Rattus norvegicus OX=10116 GN=Slc25a20 PE=1 SV=1	20	5	9	5	301	33.1	9.48	19.41	99.6	112	105.8	99.6	95.5	96.8	96.9	93.7
Q5PPJ6	Lars	Leucyl-tRNA synthetase OS=Rattus norvegicus OX=10116 GN=Lars PE=1 SV=1	6	6	6	6	1178	134.2	7.28	12.69	101.5	98.2	109.3	96.7	99.9	95.8	103	95.5
A0A0G2JT06	Gps1	COP9 signalosome complex subunit 1 OS=Rattus norvegicus OX=10116 GN=Gps1 PE=1 SV=1	12	5	9	5	526	58.8	6.74	17.76	102.9	100.4	102.9	98.7	104.2	99.7	95.9	95.3
D4AEG7	Tbc1d13	TBC1 domain family, member 13 OS=Rattus norvegicus OX=10116 GN=Tbc1d13 PE=1 SV=3	14	5	7	5	400	46.4	5.47	15.38	100.3	102.4	100.9	99.7	98.7	101.4	99.2	97.4
A0A0A0MY07	Usp15	Ubiquitin carboxyl-terminal hydrolase 15 OS=Rattus norvegicus OX=10116 GN=Usp15 PE=1 SV=1	10	6	7	6	952	109.2	5.11	11.47	107.1	102.7	100.4	97.8	91.4	96.9	103	100.7
Q923S2	Pdzk1ip1	PDZK1-interacting protein 1 OS=Rattus norvegicus OX=10116 GN=Pdzk1ip1 PE=3 SV=1	20	2	7	2	114	12.2	4.83	15.31	103.7	102.1	104.3	99.6	94.7	99.2	96.7	99.8
D4A264	Zadh2	Zinc-binding alcohol dehydrogenase, domain-containing 2 OS=Rattus norvegicus OX=10116 GN=Zadh2 PE=1 SV=2	15	4	6	4	377	40.5	7.77	19.77	97.8	102.4	103.6	99.6	100.1	95.6	96.3	104.6
P53042	Ppp5c	Serine/threonine-protein phosphatase 5 OS=Rattus norvegicus OX=10116 GN=Ppp5c PE=1 SV=1	15	6	8	6	499	56.9	6.2	15.95	95.8	103.3	98	97.4	96.4	104.8	101.9	102.5
P51886	Lum	Lumican OS=Rattus norvegicus OX=10116 GN=Lum PE=1 SV=1	14	5	9	5	338	38.3	6.43	18.45	94.6	92.4	95.8	93.4	101.8	108.3	105.4	108.3
Q0D2L6	Rragc	Ras-related GTP-binding C OS=Rattus norvegicus OX=10116 GN=Rragc PE=1 SV=1	14	5	7	5	398	44.1	5.1	18.06	95.6	104.1	101	99.3	102.5	102.2	94.3	101
D3ZJF9	Gla	Alpha-galactosidase OS=Rattus norvegicus OX=10116 GN=Gla PE=1 SV=2	19	6	6	6	420	47.5	5.72	14.79	94.8	98.1	95.9	97	101.8	101.2	106.1	105.2
A0A0G2K5E4	Dnaja3	DnaJ heat shock protein family (Hsp40) member A3 OS=Rattus norvegicus OX=10116 GN=Dnaja3 PE=1 SV=1	16	6	9	6	480	52.4	9.28	20.44	96.7	99.5	100.3	105.6	108.2	94.1	98.5	97
A0A0H2UHI7	Atad1	ATPase family AAA domain-containing protein 1 OS=Rattus norvegicus OX=10116 GN=Atad1 PE=1 SV=1	10	3	5	3	403	45.1	7.8	10.84	102.9	96.5	102.2	101.4	102.9	97.8	98	98.3
G3V6I9	Rpl26	60S ribosomal protein L26 OS=Rattus norvegicus OX=10116 GN=Rpl26 PE=1 SV=1	25	5	10	5	145	17.2	10.55	14.99	94.6	96.4	92.7	97.5	105.3	102.3	106.6	104.6
Q5M9I5	Uqcrh	Cytochrome b-c1 complex subunit 6, mitochondrial OS=Rattus norvegicus OX=10116 GN=Uqcrh PE=3 SV=1	37	3	11	3	89	10.4	4.97	31.5	99.6	96.6	91.2	98.7	112.2	102.8	99.1	99.8
D3ZSF3		Peptidyl-prolyl cis-trans isomerase OS=Rattus norvegicus OX=10116 PE=3 SV=1	18	1	12	1	152	16.5	5.1	11.47	91.7	95.2	93	94.8	106.8	109.4	103.8	105.3
A0A0G2K8Q1	Apoc3	Apolipoprotein C-III OS=Rattus norvegicus OX=10116 GN=Apoc3 PE=1 SV=1	39	2	7	2	100	11	4.77	10.59	103.4	101.6	100.7	100.6	99.6	96.1	99.9	98.1
Q66H15	Rmdn3	Regulator of microtubule dynamics protein 3 OS=Rattus norvegicus OX=10116 GN=Rmdn3 PE=1 SV=1	18	6	8	6	471	52.3	5.02	14.56	103.1	101.7	103.5	95.6	98	95.6	104	98.4
Q5U2N2	Usp14	Ubiquitin specific protease 14 OS=Rattus norvegicus OX=10116 GN=Usp14 PE=1 SV=1	11	5	8	5	493	55.9	5.2	15.61	109.1	98.7	96	97	101.3	95.5	100.1	102.2
G3V9V3	Dync1i2	Cytoplasmic dynein 1 intermediate chain 2 OS=Rattus norvegicus OX=10116 GN=Dync1i2 PE=1 SV=3	13	5	7	5	638	71.3	5.24	15.29	95	98.7	94.7	96.3	101.4	105.4	103.5	105
B2RYG5	Taf15	TATA-box-binding protein-associated factor 15 OS=Rattus norvegicus OX=10116 GN=Taf15 PE=2 SV=1	6	5	8	2	572	60	8.4	15.16	98.1	93.9	94	92.3	103.3	108	108.4	102.1
Q5U2X7	Timm21	Mitochondrial import inner membrane translocase subunit Tim21 OS=Rattus norvegicus OX=10116 GN=Timm21 PE=2 SV=1	18	4	8	4	245	27.9	9.99	19.24	102.8	102.4	105.3	99.8	97.2	99	98.3	95.3
M0RCH6		Uncharacterized protein OS=Rattus norvegicus OX=10116 PE=1 SV=2	27	5	9	2	222	24.8	5	16.08	99.2	100.3	99.8	101.1	99.1	99.4	99.3	101.7
A0A0G2JUR5	Mprip	Myosin phosphatase Rho-interacting protein OS=Rattus norvegicus OX=10116 GN=Mprip PE=1 SV=1	4	7	9	7	2123	239.9	5.4	11.67	107.6	101.6	113.3	98	97.6	93.3	95.6	93.1
D3ZYS7	G3bp1	G3BP stress granule assembly factor 1 OS=Rattus norvegicus OX=10116 GN=G3bp1 PE=1 SV=1	16	5	7	5	465	51.8	5.59	14.05	93.5	95.1	99	96.1	111	101.5	100.4	103.4
G3V8L9	Cavin1	Caveolae-associated protein 1 OS=Rattus norvegicus OX=10116 GN=Cavin1 PE=1 SV=1	18	5	6	5	392	43.9	5.52	9.69	101.2	96.3	99.3	95.6	101.3	98.5	101.4	106.3
P02767	Ttr	Transthyretin OS=Rattus norvegicus OX=10116 GN=Ttr PE=1 SV=1	26	3	6	3	147	15.7	6.16	15.26	94.5	94.9	96.8	100.6	106	102.7	101.2	103.3
A0A0G2K022	Rcn3	Reticulocalbin 3 OS=Rattus norvegicus OX=10116 GN=Rcn3 PE=1 SV=1	17	5	6	5	337	38.9	4.86	14.31	94.7	96.8	102.4	92.7	107.6	100.8	99.7	105.2
A0A1W2Q6L2		Uncharacterized protein OS=Rattus norvegicus OX=10116 PE=3 SV=1	9	5	11	5	444	50.6	10.07	20.22	93.5	94.7	93.2	95.7	103.3	106.2	106.3	107.1
D3ZRX9	Cnn2	Calponin (Fragment) OS=Rattus norvegicus OX=10116 GN=Cnn2 PE=1 SV=3	25	4	6	4	219	24.1	8.69	8.33	94.2	84.7	93.4	90.2	114.4	111.1	112.2	99.8
Q3KRD5	Tomm34	Mitochondrial import receptor subunit TOM34 OS=Rattus norvegicus OX=10116 GN=Tomm34 PE=1 SV=1	19	4	5	4	309	34.4	9.13	14.78	99.4	95.8	101.6	98.7	108.9	100.7	98.8	96.1
Q63159	Coq3	Ubiquinone biosynthesis O-methyltransferase, mitochondrial OS=Rattus norvegicus OX=10116 GN=Coq3 PE=2 SV=2	13	3	5	3	345	38.7	7.97	13.98	100.2	101.8	110.7	102.6	95.9	95.8	95.4	97.7
D4A2G9	Ranbp1	RAN-binding protein 1 OS=Rattus norvegicus OX=10116 GN=Ranbp1 PE=1 SV=1	21	3	10	3	203	23.6	5.22	20.57	95	94.6	96.7	97.2	101.8	103.7	103.6	107.4
D3ZAZ0	Eif3m	Eukaryotic translation initiation factor 3 subunit M OS=Rattus norvegicus OX=10116 GN=Eif3m PE=1 SV=1	11	3	6	3	374	42.5	5.74	10.59	94.5	96.1	90.2	91.5	108.2	107.5	107.3	104.6
A0A0G2K0V3	Bpnt1	3'(2'),5'-bisphosphate nucleotidase 1 OS=Rattus norvegicus OX=10116 GN=Bpnt1 PE=1 SV=1	15	4	7	4	323	35	6.24	20.36	102.9	103.8	98.2	105.2	103	98.4	95	93.5
P42346	Mtor	Serine/threonine-protein kinase mTOR OS=Rattus norvegicus OX=10116 GN=Mtor PE=1 SV=1	3	6	6	6	2549	288.6	7.17	10.1	123.1	100.6	106	93.3	96.9	90.8	96.1	93.4
B1WBY1	Cul1	Cul1 protein OS=Rattus norvegicus OX=10116 GN=Cul1 PE=1 SV=1	9	6	6	6	776	89.6	8	9.85	100.6	94.4	98.2	101.3	100.5	101.2	99.3	104.6
D4A3E1	Hnrnpll	Heterogeneous nuclear ribonucleoprotein L-like OS=Rattus norvegicus OX=10116 GN=Hnrnpll PE=1 SV=1	8	4	7	4	591	64.3	5.95	16.85	92	93.8	95.7	93.4	102.3	109.6	108	105
Q6MGC4	Pfdn6	H2-K region expressed gene 2, rat orthologue OS=Rattus norvegicus OX=10116 GN=Pfdn6 PE=1 SV=1	27	3	6	3	127	14.5	8.88	17.04	94.6	101.8	98.7	104.1	103.7	98.6	98.6	99.9
D3ZD89	Naa15	N(alpha)-acetyltransferase 15, NatA auxiliary subunit OS=Rattus norvegicus OX=10116 GN=Naa15 PE=1 SV=2	8	6	7	6	865	100.9	7.61	13.91	101.3	101.8	98.6	99.1	98.7	97.8	101	101.6
Q68FX1	Mpi	Mannose-6-phosphate isomerase OS=Rattus norvegicus OX=10116 GN=Mpi PE=2 SV=1	21	7	9	7	423	46.4	6.02	9.54	102.4	99.6	97.3	91.5	102.6	96.1	105	105.6
B0BNE6	Ndufs8	NADH dehydrogenase (Ubiquinone) Fe-S protein 8 (Predicted), isoform CRA_a OS=Rattus norvegicus OX=10116 GN=Ndufs8 PE=1 SV=1	21	4	9	4	212	24	6.21	21.32	99.8	99.4	100.5	99.3	101.3	99.5	97.4	102.8
B1WC73	Arl6	ADP-ribosylation factor-like 6 (Predicted), isoform CRA_a OS=Rattus norvegicus OX=10116 GN=Arl6 PE=1 SV=1	48	6	6	6	186	21	8.25	12	101.3	100.5	99.1	93.6	108	102.9	95.3	99.2
F1M7Y5	Prkci	Protein kinase C iota type OS=Rattus norvegicus OX=10116 GN=Prkci PE=1 SV=1	14	5	5	5	596	68.2	5.85	15.31	100.4	98.7	99.1	101.5	100.9	97.3	104.6	97.4
A0A0G2K4A0	Rab11fip5	RAB11 family-interacting protein 5 OS=Rattus norvegicus OX=10116 GN=Rab11fip5 PE=1 SV=1	12	5	6	3	636	68.7	9.13	17.03	102.7	99.4	97.3	95.6	102	102.8	97.6	102.6
A0A0G2JXN6	Lgals3	Galectin OS=Rattus norvegicus OX=10116 GN=Lgals3 PE=1 SV=1	14	3	5	3	265	27.6	8.87	14.32	92.1	89.1	89.4	86.3	110.6	110.5	111.7	110.2
M0RCH0	EIF3I	Eukaryotic translation initiation factor 3 subunit I OS=Rattus norvegicus OX=10116 GN=EIF3I PE=3 SV=2	23	5	8	5	331	37.1	8.56	18.26	103.9	93.3	92.4	93.6	103.8	107.6	101.6	103.9
F1LPS8	Pura	Transcriptional activator protein Pur-alpha OS=Rattus norvegicus OX=10116 GN=Pura PE=1 SV=3	17	4	8	4	289	31.9	8.59	18.58	96.1	96.5	101.6	95.8	103.7	102.1	101.6	102.5
Q6MG49	Bag6	Large proline-rich protein BAG6 OS=Rattus norvegicus OX=10116 GN=Bag6 PE=1 SV=2	7	6	7	6	1146	119.9	5.66	11.81	100.5	104.2	98.1	94.3	96.2	99.6	100.3	106.8
D4A510	Smarcc2	SWI/SNF-related, matrix-associated, actin-dependent regulator of chromatin, subfamily c, member 2 OS=Rattus norvegicus OX=10116 GN=Smarcc2 PE=1 SV=3	6	5	6	5	1135	124.7	5.44	9.14	97.1	92.8	96.9	93.9	109.3	107.8	98.8	103.6
O70257	Stx7	Syntaxin-7 OS=Rattus norvegicus OX=10116 GN=Stx7 PE=1 SV=4	23	5	6	5	261	29.8	5.43	9.89	100	100.5	103.2	100.2	100.2	102.7	101.4	91.8
P61621	Sec61a1	Protein transport protein Sec61 subunit alpha isoform 1 OS=Rattus norvegicus OX=10116 GN=Sec61a1 PE=2 SV=2	11	4	8	4	476	52.2	8.06	19.55	98.6	94	94.4	97.4	104.3	103.2	105.6	102.5
Q68FW7	Tars2	Threonine--tRNA ligase, mitochondrial OS=Rattus norvegicus OX=10116 GN=Tars2 PE=2 SV=1	7	5	7	4	723	81.6	7.87	16.18	99	102	100.8	96.6	102.3	104.5	97.2	97.6
Q5I0K8	Mrps7	28S ribosomal protein S7, mitochondrial OS=Rattus norvegicus OX=10116 GN=Mrps7 PE=2 SV=2	22	4	5	4	242	28.2	10.02	15.55	109.1	100.7	99.3	98.1	101.7	95.2	100.6	95.3
F1M775	Diaph1	Diaphanous-related formin 1 OS=Rattus norvegicus OX=10116 GN=Diaph1 PE=1 SV=3	7	7	8	7	1265	140.3	5.54	11.86	105.2	108.9	103.6	95.5	100.1	95.2	98.2	93.3
Q5U1Y4	Akr1e2	1,5-anhydro-D-fructose reductase OS=Rattus norvegicus OX=10116 GN=Akr1e2 PE=2 SV=1	19	6	10	5	301	34.5	7.61	25.91	103.3	104.6	107.3	100.4	97.7	96.7	94	96.1
D3ZQ57	Plxnb2	Plexin B2 OS=Rattus norvegicus OX=10116 GN=Plxnb2 PE=1 SV=1	4	6	7	6	1841	205.8	5.99	10.13	97.3	95.3	99.4	95.6	104.1	102	105.5	100.9
G3V8Y1	Gba3	Glucosidase, beta, acid 3 (Cytosolic) (Predicted) OS=Rattus norvegicus OX=10116 GN=Gba3 PE=3 SV=1	14	4	8	1	284	33.3	7.17	15.76	101.2	106.2	102.5	107.7	92.7	101.7	96.1	91.8
B2RYI2	Srp68	Signal recognition particle subunit SRP68 OS=Rattus norvegicus OX=10116 GN=Srp68 PE=1 SV=1	19	9	9	9	625	70.4	8.57	14.54	98	97.8	101.8	102.9	100.7	96.9	102.7	99.2
P68182	Prkacb	cAMP-dependent protein kinase catalytic subunit beta OS=Rattus norvegicus OX=10116 GN=Prkacb PE=1 SV=2	11	4	9	1	351	40.7	8.56	16.03	85.7	92.5	147.6	97.3	94.2	93.7	93.8	95.2
D3ZRD9	Aif1l	Allograft inflammatory factor 1-like OS=Rattus norvegicus OX=10116 GN=Aif1l PE=4 SV=1	39	5	10	5	150	17	7.18	14.97	100	93.8	99.5	97.9	98.6	99.7	107.1	103.3
Q68FT7	Farsb	Phenylalanyl-tRNA synthetase subunit beta OS=Rattus norvegicus OX=10116 GN=Farsb PE=1 SV=1	10	6	7	6	589	65.6	7.05	13.52	107.3	96.3	93.5	97.4	102	99.7	101.6	102.2
P23457	Akr1c9	3-alpha-hydroxysteroid dehydrogenase OS=Rattus norvegicus OX=10116 GN=Akr1c9 PE=1 SV=1	26	6	12	4	322	37	7.09	18.63	88.7	80.6	83.9	79.3	120	109.7	123.6	114.2
Q7TT47	Spg7	Paraplegin OS=Rattus norvegicus OX=10116 GN=Spg7 PE=2 SV=2	12	6	7	6	781	86	8.81	12.55	103.7	100.3	100.1	97.3	104.7	101	97.1	95.9
B5DEG8	Sec24c	LOC685144 protein OS=Rattus norvegicus OX=10116 GN=Sec24c PE=1 SV=1	10	8	10	8	1095	118.4	7.06	14.02	94.8	99.8	93.7	95.7	96.5	99.6	105	114.8
D2XV59	Gtpbp1	GTP-binding protein 1 OS=Rattus norvegicus OX=10116 GN=Gtpbp1 PE=1 SV=1	9	4	5	4	669	72.4	8.34	13.03	99.1	93.6	99.3	97.6	101.2	99.4	105.6	104.3
P35571	Gpd2	Glycerol-3-phosphate dehydrogenase, mitochondrial OS=Rattus norvegicus OX=10116 GN=Gpd2 PE=1 SV=1	10	7	8	7	727	80.9	6.62	15.46	96.6	97.7	98.3	93.2	103.5	101.7	104.9	104.1
D3ZZT9	Col14a1	Collagen type XIV alpha 1 chain OS=Rattus norvegicus OX=10116 GN=Col14a1 PE=1 SV=3	5	7	7	7	1794	192.4	5.22	14.41	95.2	91.8	98.8	86.2	108	102.7	106.9	110.4
F1LT58	Kpna6	Importin subunit alpha OS=Rattus norvegicus OX=10116 GN=Kpna6 PE=1 SV=3	15	5	7	5	541	60.4	4.98	11.87	105.4	95.6	101.8	95.9	98.2	101.2	98.5	103.3
D4AE06	Fkbp15	Peptidylprolyl isomerase OS=Rattus norvegicus OX=10116 GN=Fkbp15 PE=1 SV=3	6	4	5	4	1195	131.1	5.29	12.55	96.8	95.1	93.8	92.4	101.9	105.2	109.3	105.6
G3V784	Adpgk	ADP-dependent glucokinase OS=Rattus norvegicus OX=10116 GN=Adpgk PE=1 SV=1	11	4	5	4	496	53.9	5.8	9.01	100.5	90.6	97.7	93.7	101.8	103.2	107.5	105.1
D4ACL2	Ttc38	Tetratricopeptide repeat domain 38 OS=Rattus norvegicus OX=10116 GN=Ttc38 PE=1 SV=2	16	7	7	7	512	57	6.44	12.01	94	100.1	98.9	94.1	103.7	100.3	104.6	104.2
P13668	Stmn1	Stathmin OS=Rattus norvegicus OX=10116 GN=Stmn1 PE=1 SV=2	30	4	6	4	149	17.3	5.97	14.93	97.3	92.4	98.1	96.5	101.7	104.7	104.5	104.8
D4A8H3	Uba6	Similar to RIKEN cDNA 5730469D23 (Predicted) OS=Rattus norvegicus OX=10116 GN=Uba6 PE=1 SV=1	7	6	7	6	1053	117.9	6.07	10.01	105.8	106	99.5	98.4	96.5	98.1	99.7	96.2
D4ADT5	Ddx58	DEAD (Asp-Glu-Ala-Asp) box polypeptide 58 (Predicted) OS=Rattus norvegicus OX=10116 GN=Ddx58 PE=1 SV=3	8	5	7	5	598	68.3	5.69	12.58	95.4	104.4	102.5	99.8	101.4	103.2	99.9	93.4
Q6AXY8	Dhrs1	Dehydrogenase/reductase (SDR family) member 1 OS=Rattus norvegicus OX=10116 GN=Dhrs1 PE=1 SV=1	17	5	6	5	313	34	8.21	14.36	101.3	102.5	100.6	103.4	99.6	97.8	98.7	96
F2Z3T9	U2af2	U2 snRNP auxiliary factor large subunit OS=Rattus norvegicus OX=10116 GN=U2af2 PE=1 SV=2	15	4	7	4	471	53.1	9.09	5.7	94.9	95.8	97.5	99	102.7	99.4	106.5	104.2
B0K010	Txndc17	Thioredoxin domain-containing 17 OS=Rattus norvegicus OX=10116 GN=Txndc17 PE=1 SV=1	34	4	10	4	123	14.1	4.93	18.23	100.3	97.9	96.3	99	103.5	99.7	101.9	101.5
M0R9Q1	Rbm14	RCG48334, isoform CRA_e OS=Rattus norvegicus OX=10116 GN=Rbm14 PE=1 SV=1	10	6	8	6	669	69.5	9.67	16.22	99.2	98.2	97.4	93.6	105.5	101.2	102.6	102.3
A0A0H2UI10	Oga	Meningioma expressed antigen 5 (hyaluronidase) OS=Rattus norvegicus OX=10116 GN=Oga PE=1 SV=1	7	5	6	5	948	106.1	5.03	10.85	99.6	96.6	101.2	104.3	107.3	100.6	98.8	91.6
C6ZII9	Sirt3	NAD-dependent protein deacetylase OS=Rattus norvegicus OX=10116 GN=Sirt3 PE=1 SV=1	12	4	5	4	320	35	7.42	14.09	109.5	99.9	110.5	98.5	97.6	93.7	97.1	93.2
P08011	Mgst1	Microsomal glutathione S-transferase 1 OS=Rattus norvegicus OX=10116 GN=Mgst1 PE=1 SV=3	16	2	9	2	155	17.5	9.61	18.89	102	102.6	102.2	102.1	97.7	98.6	94.8	99.9
A0A0G2JZG7	Sars	Serine--tRNA ligase, cytoplasmic OS=Rattus norvegicus OX=10116 GN=Sars PE=1 SV=1	16	8	9	8	536	61.3	6.86	12.57	96.7	95.5	97.2	98.4	101.7	101.1	102.9	106.5
A0A0G2JWM2	Sirt2	NAD-dependent protein deacetylase OS=Rattus norvegicus OX=10116 GN=Sirt2 PE=1 SV=1	17	4	5	4	388	43.1	5.53	8.97	101.1	94.6	103.7	103	99.9	101.6	96.4	99.7
Q499N6	Ubxn1	UBX domain-containing protein 1 OS=Rattus norvegicus OX=10116 GN=Ubxn1 PE=3 SV=2	28	5	7	5	297	33.6	5.26	13.94	98.7	100	96.9	97.7	103.2	98	101.9	103.7
Q6V9V9	Stk25	Serine/threonine kinase 25 OS=Rattus norvegicus OX=10116 GN=Stk25 PE=1 SV=1	16	5	6	3	426	48.1	6.81	10.48	97.6	97.2	99.3	98.8	102.5	100.8	105.2	98.7
Q3ZB99	Tjp2	Tight junction protein 2 OS=Rattus norvegicus OX=10116 GN=Tjp2 PE=1 SV=1	6	7	7	7	1164	131.3	6.73	12.43	94.3	97.5	102.4	97.4	104.1	101	99.5	103.8
D3ZD73	Ddx6	DEAD-box helicase 6 OS=Rattus norvegicus OX=10116 GN=Ddx6 PE=1 SV=1	18	7	9	6	483	54.2	8.66	19.69	105	105.6	97.9	98.4	97.8	106.2	97.4	91.6
F1M6Q3	Col4a2	Collagen type IV alpha 2 chain OS=Rattus norvegicus OX=10116 GN=Col4a2 PE=1 SV=3	2	3	8	3	1645	160.7	8.09	13.6	89.4	87.5	91.6	109.6	128.9	94.6	103.7	94.7
Q6AYQ9	Ppic	Peptidyl-prolyl cis-trans isomerase OS=Rattus norvegicus OX=10116 GN=Ppic PE=1 SV=1	29	4	7	4	212	23	8.13	11.75	101.8	100.7	99.8	103.4	100.3	95.6	96.7	101.6
P61023	Chp1	Calcineurin B homologous protein 1 OS=Rattus norvegicus OX=10116 GN=Chp1 PE=1 SV=2	44	6	8	6	195	22.4	5.1	9.34	96.8	101.6	106.5	97	99	97	99.6	102.5
F7F1Y3	Vps4a	Vacuolar protein sorting-associated protein 4A OS=Rattus norvegicus OX=10116 GN=Vps4a PE=1 SV=1	11	5	6	3	510	56.1	7.97	15.74	100.8	104.5	104.1	99.3	99.6	93.5	96.5	101.6
Q05096	Myo1b	Unconventional myosin-Ib OS=Rattus norvegicus OX=10116 GN=Myo1b PE=1 SV=1	6	6	6	5	1136	131.8	9.36	13.44	102	102.5	104.9	98.1	101.4	95.3	100.3	95.4
Q9JHW0	Psmb7	Proteasome subunit beta type-7 OS=Rattus norvegicus OX=10116 GN=Psmb7 PE=1 SV=1	29	5	7	5	277	29.9	7.97	19.35	95.6	91.2	91.3	95.8	100.2	99.8	112.7	113.4
Q6PEC0	Nudt2	Bis(5'-nucleosyl)-tetraphosphatase [asymmetrical] OS=Rattus norvegicus OX=10116 GN=Nudt2 PE=2 SV=3	32	3	5	3	147	16.9	5.53	10.01	98.5	98.3	110.1	100.1	100.7	98	94.7	99.6
B1WC67	Slc25a24	RCG29001 OS=Rattus norvegicus OX=10116 GN=Slc25a24 PE=1 SV=1	14	6	8	6	475	52.9	8.05	13.06	97.6	90.7	97.1	94.5	105.1	106.4	106.1	102.4
P41499	Ptpn11	Tyrosine-protein phosphatase non-receptor type 11 OS=Rattus norvegicus OX=10116 GN=Ptpn11 PE=1 SV=4	13	7	7	7	597	68.4	7.28	12.58	96.7	97.1	101	94.4	100.3	112	102.4	96.1
B2RZ79	Iscu	Iron-sulfur cluster assembly enzyme OS=Rattus norvegicus OX=10116 GN=Iscu PE=1 SV=1	37	5	7	5	167	18	9.29	9.69	104.9	95.9	95.4	101.2	100.2	101.3	98.1	103
Q5FVL8	Abcb10	ATP-binding cassette subfamily B member 10 OS=Rattus norvegicus OX=10116 GN=Abcb10 PE=1 SV=1	10	6	6	6	715	77.3	9.63	13.32	104.4	109.8	109.3	109.4	92.8	95.6	92.5	86.1
A0A0G2JZJ9		Uncharacterized protein OS=Rattus norvegicus OX=10116 PE=4 SV=1	30	3	8	3	106	12.7	8.69	14.46	97.5	99.4	100.8	102.5	101	102.7	96.8	99.3
A0A0G2K4T8	Mipep	Mitochondrial intermediate peptidase OS=Rattus norvegicus OX=10116 GN=Mipep PE=1 SV=1	11	5	6	5	711	80.8	6.57	15.83	107.8	106.2	104	99.9	94.5	95.2	95.3	97.1
Q66H59	Npl	N-acetylneuraminate lyase OS=Rattus norvegicus OX=10116 GN=Npl PE=2 SV=1	17	4	5	4	320	35.1	6.93	12.64	95.7	92.8	95.8	101	115.6	98.7	98.6	101.8
Q6B345	S100a11	Protein S100-A11 OS=Rattus norvegicus OX=10116 GN=S100a11 PE=3 SV=1	35	3	10	3	98	11.1	5.9	17.33	88.1	82.1	85.3	85.3	113.8	115.9	116.4	113.2
F1M8E9	Lyz2	Lysozyme OS=Rattus norvegicus OX=10116 GN=Lyz2 PE=1 SV=1	20	2	11	2	148	16.7	8.94	33.23	98.2	101.1	99.8	100.8	100.2	99.9	99.8	100.2
A0A0G2K132	Fmnl2	Formin-like 2 OS=Rattus norvegicus OX=10116 GN=Fmnl2 PE=1 SV=1	6	5	7	4	1038	117.9	8.06	14.07	97.2	96.3	95.9	92.6	106.6	107	102.3	102.1
Q6MG08	Abcf1	ATP-binding cassette sub-family F member 1 OS=Rattus norvegicus OX=10116 GN=Abcf1 PE=1 SV=1	8	6	7	6	839	95.2	6.65	10.79	98.2	101	102	92.1	105.5	98.3	99.1	103.8
D4A3I4	Btf3l4	Transcription factor BTF3 OS=Rattus norvegicus OX=10116 GN=Btf3l4 PE=1 SV=1	27	5	8	2	158	17.3	6.35	16.53	96.9	102.6	107.2	101.5	100	99.7	96.9	95.1
D4A631	Arfgef1	Brefeldin A-inhibited guanine nucleotide-exchange protein 1 OS=Rattus norvegicus OX=10116 GN=Arfgef1 PE=1 SV=1	5	7	7	2	1846	207.8	5.77	10.95	97.8	100.4	102.8	101.1	106	98.1	93.8	99.9
Q6P7Q4	Glo1	Lactoylglutathione lyase OS=Rattus norvegicus OX=10116 GN=Glo1 PE=1 SV=3	38	6	9	6	184	20.8	5.31	16.91	106.3	101.3	102.8	102.4	96.5	98.3	98	94.4
P84817	Fis1	Mitochondrial fission 1 protein OS=Rattus norvegicus OX=10116 GN=Fis1 PE=1 SV=1	24	3	11	3	152	17	8.53	18.61	97.3	110.4	112.6	93	96.3	96.9	96.8	96.7
Q5XIA1	Ncln	Nicalin OS=Rattus norvegicus OX=10116 GN=Ncln PE=2 SV=1	8	4	5	4	563	63	6.58	14.1	97.2	101	104.9	95.5	99.5	102.3	99.3	100.3
Q562C6	Lztfl1	Leucine zipper transcription factor-like protein 1 OS=Rattus norvegicus OX=10116 GN=Lztfl1 PE=2 SV=1	21	6	7	6	299	34.6	5.3	14.07	104.6	105.6	107	102.5	96.5	91.6	95.2	96.9
G3V7I3	Atp13a1	Cation-transporting ATPase OS=Rattus norvegicus OX=10116 GN=Atp13a1 PE=1 SV=1	6	5	5	5	1197	131.8	8.07	13.97	101.2	99.4	116	97.4	99.5	91.3	99.6	95.6
P32577	Csk	Tyrosine-protein kinase CSK OS=Rattus norvegicus OX=10116 GN=Csk PE=1 SV=1	14	5	5	5	450	50.7	7.06	12.68	101.3	94.4	95.6	97.1	103.6	103	102.6	102.3
A0A0G2K3E7	Nat8f1	N-acetyltransferase 8 (GCN5-related) family member 1 OS=Rattus norvegicus OX=10116 GN=Nat8f1 PE=1 SV=1	13	4	11	2	255	28.7	9.61	26.09	104.8	107.9	108.5	109.2	94.4	92.3	93.1	89.9
A0A0G2K2V7	Yes1	Tyrosine-protein kinase OS=Rattus norvegicus OX=10116 GN=Yes1 PE=1 SV=1	9	4	7	2	526	58.1	8.72	12.44	95.5	92.9	99.7	102.4	102.3	99.3	105.2	102.7
Q642B0	Gpc4	Glypican 4 OS=Rattus norvegicus OX=10116 GN=Gpc4 PE=1 SV=1	11	4	6	4	557	62.5	6	12.05	101.6	98.2	100.6	95.5	97.1	105.2	103.8	97.9
G3V790	Smarca4	Transcription activator BRG1 OS=Rattus norvegicus OX=10116 GN=Smarca4 PE=1 SV=2	5	6	6	2	1613	181.3	8	9.82	97.4	101	101	95.1	105.4	100.2	98.1	101.8
Q08602	Rabggta	Geranylgeranyl transferase type-2 subunit alpha OS=Rattus norvegicus OX=10116 GN=Rabggta PE=1 SV=1	17	6	6	6	567	64.9	5.66	9.5	107.3	98.7	106.4	90.8	86.6	103.1	99.2	107.9
F1M978	Impa1	Inositol-1-monophosphatase OS=Rattus norvegicus OX=10116 GN=Impa1 PE=1 SV=1	20	6	7	6	277	30.5	5.29	13.34	95.9	97.1	99.8	94.8	103.1	103.2	100.5	105.7
D3ZJD3		Uncharacterized protein OS=Rattus norvegicus OX=10116 PE=4 SV=1	25	5	18	5	137	15.6	11.93	36.13	93.2	96.5	93.6	99.2	103.6	101.9	99.4	112.6
Q8K1Q0	Nmt1	Glycylpeptide N-tetradecanoyltransferase 1 OS=Rattus norvegicus OX=10116 GN=Nmt1 PE=1 SV=1	11	4	5	4	496	56.8	7.99	11.69	101.1	97.2	103.3	95.7	98.4	102.5	96.4	105.2
D3ZIQ1	Acot4	Acyl-CoA thioesterase 4 OS=Rattus norvegicus OX=10116 GN=Acot4 PE=1 SV=1	13	5	10	1	421	46.3	7.62	18.54	110	100.3	97.2	97.6	97.2	96.1	97.9	103.7
A0A0G2K350	Napg	NSF attachment protein gamma OS=Rattus norvegicus OX=10116 GN=Napg PE=1 SV=1	17	5	7	5	312	34.6	5.41	19.2	101.6	104.3	97.9	97.4	101.4	98.5	95.9	102.9
P46720	Slco1a1	Solute carrier organic anion transporter family member 1A1 OS=Rattus norvegicus OX=10116 GN=Slco1a1 PE=1 SV=1	8	5	6	5	670	74.1	7.87	9.45	116.9	111.3	110.5	110.4	86.1	92.4	82.3	90
B1WBS5	Slc5a10	Slc5a10 protein OS=Rattus norvegicus OX=10116 GN=Slc5a10 PE=2 SV=1	11	4	7	4	540	59.1	8.12	14.09	99.3	99	89.1	96.8	105.7	101.3	106	102.8
B2GV01	Mta2	Metastasis-associated 1 family, member 2 OS=Rattus norvegicus OX=10116 GN=Mta2 PE=1 SV=1	11	7	7	5	668	74.9	9.67	14.47	104.8	112.5	106.9	93.3	97	92	97.1	96.3
P29419	Atp5me	ATP synthase subunit e, mitochondrial OS=Rattus norvegicus OX=10116 GN=Atp5me PE=1 SV=3	42	3	9	3	71	8.2	9.35	23.6	97.6	99.8	98	101.4	99.6	101.6	100.8	101.2
Q03555	Gphn	Gephyrin OS=Rattus norvegicus OX=10116 GN=Gphn PE=1 SV=3	6	4	5	4	768	83.2	5.73	13.99	96.4	98.7	104.3	99.8	100.9	100.8	101.8	97.3
F8WFK6	Gpx4	Glutathione peroxidase OS=Rattus norvegicus OX=10116 GN=Gpx4 PE=1 SV=2	21	5	8	5	252	29.2	10.36	11.18	104.1	100.6	108.3	102.4	98.7	87.9	97.7	100.3
E9PST5	Acin1	Apoptotic chromatin condensation inducer 1 OS=Rattus norvegicus OX=10116 GN=Acin1 PE=1 SV=1	4	5	5	5	1339	150.9	5.86	13.36	101.6	98.7	91.5	96.5	103.7	97.1	104.9	106
P38656	Ssb	Lupus La protein homolog OS=Rattus norvegicus OX=10116 GN=Ssb PE=1 SV=1	11	4	11	4	415	47.7	9.73	17.43	95.2	94.7	91.8	93.1	107.8	108	103.5	105.9
Q75Q41	Tomm22	Mitochondrial import receptor subunit TOM22 homolog OS=Rattus norvegicus OX=10116 GN=Tomm22 PE=1 SV=1	33	3	5	3	142	15.5	4.34	11.64	98.7	98.2	92.3	95	99.9	108.6	105.9	101.5
F1M949	Ckap5	Cytoskeleton-associated protein 5 OS=Rattus norvegicus OX=10116 GN=Ckap5 PE=1 SV=3	4	6	6	6	1698	187.8	8.12	10.03	111.3	92.9	92.8	100.3	106.1	98.9	99.2	98.5
P19139	Csnk2a1	Casein kinase II subunit alpha OS=Rattus norvegicus OX=10116 GN=Csnk2a1 PE=1 SV=2	10	3	5	3	391	45	7.74	12.52	94.2	98.4	100.5	95.1	99.3	106.3	102.6	103.6
A0A0G2K5F1	Macrod1	LRP16 protein OS=Rattus norvegicus OX=10116 GN=Macrod1 PE=1 SV=1	21	5	6	5	323	35.3	9.03	11.42	102.1	99.9	100.1	100.4	97.6	98.8	99.4	101.7
Q5XIP9	Tmem43	Transmembrane protein 43 OS=Rattus norvegicus OX=10116 GN=Tmem43 PE=2 SV=1	13	4	6	4	400	44.7	7.36	14.29	98.6	94	109.9	95.6	100.7	96.8	96.1	108.3
P20171	Hras	GTPase HRas OS=Rattus norvegicus OX=10116 GN=Hras PE=1 SV=2	22	3	4	1	189	21.3	5.31	9.31	109.5	101.8	99.3	95.7	97.3	99	92	105.3
A0A0G2JV12	Col15a1	Collagen type XV alpha 1 chain OS=Rattus norvegicus OX=10116 GN=Col15a1 PE=1 SV=1	4	4	5	4	1345	138.2	5.01	8.71	89.5	92	97.7	97.8	107.2	108.2	101.7	106
P63164	Snrpn	Small nuclear ribonucleoprotein-associated protein N OS=Rattus norvegicus OX=10116 GN=Snrpn PE=2 SV=1	12	3	5	3	240	24.6	11.19	14.01	97.4	100.6	99.3	95.7	101.9	100	101.8	103.3
P62747	Rhob	Rho-related GTP-binding protein RhoB OS=Rattus norvegicus OX=10116 GN=Rhob PE=1 SV=1	20	3	8	1	196	22.1	5.24	14.04	107.4	94.4	108.6	94.1	102.4	106.3	97	89.8
Q9JIY6	Cml6	Probable N-acetyltransferase CML6 OS=Rattus norvegicus OX=10116 GN=Cml6 PE=2 SV=1	25	5	9	2	222	24.8	8.56	18.59	108.2	103.2	112.1	111	89.5	92.8	93.7	89.5
Q04931	Ssrp1	FACT complex subunit SSRP1 OS=Rattus norvegicus OX=10116 GN=Ssrp1 PE=1 SV=2	5	3	5	3	709	80.9	6.87	13.04	96.8	95.3	95	90.4	105.1	102.5	106.8	108
Q6DGF2	Clint1	Clathrin interactor 1 OS=Rattus norvegicus OX=10116 GN=Clint1 PE=1 SV=1	14	5	6	5	472	52.1	6.25	12.71	97	96.5	95.6	97.9	104.1	100.7	104.8	103.6
P38718	Mpc2	Mitochondrial pyruvate carrier 2 OS=Rattus norvegicus OX=10116 GN=Mpc2 PE=2 SV=1	17	3	11	3	127	14.2	10.48	20.22	91.9	102.8	104	107	99.2	99.2	97.6	98.3
B1H250	Glyatl1	Glycine-N-acyltransferase-like 1 OS=Rattus norvegicus OX=10116 GN=Glyatl1 PE=1 SV=1	22	4	5	4	296	34	8.02	9.45	99.9	98.4	107.2	107.6	88.8	123	87.8	87.3
P35280	Rab8a	Ras-related protein Rab-8A OS=Rattus norvegicus OX=10116 GN=Rab8a PE=1 SV=2	21	4	10	1	207	23.7	9.07	26.51	101.1	110	97.7	97.6	104.1	85.6	93.4	110.4
Q3ZAV2	Ybx1	Nuclease-sensitive element-binding protein 1 OS=Rattus norvegicus OX=10116 GN=Ybx1 PE=1 SV=1	16	3	5	3	326	36.2	9.88	11.13	91.4	100.5	107.8	95.9	98.7	99.4	101.3	105
Q32PZ3	Unc45a	Protein unc-45 homolog A OS=Rattus norvegicus OX=10116 GN=Unc45a PE=2 SV=1	7	5	7	5	944	103.2	6.19	10.35	103.2	102.1	106.4	95.1	100.5	101.4	96.2	95.1
B2RZ37	Reep5	Receptor expression-enhancing protein 5 OS=Rattus norvegicus OX=10116 GN=Reep5 PE=1 SV=1	19	5	8	4	189	21.4	8.12	14.85	89.6	93.5	118.4	97.6	98.4	101.3	103.2	98
F1LN91	Tns3	Tensin 3 OS=Rattus norvegicus OX=10116 GN=Tns3 PE=1 SV=2	3	5	6	3	1526	164.7	6.9	10.02	95.4	101.6	103.5	98.2	98.7	106.7	93.9	102
Q5U3Z3	Isoc2	Isochorismatase domain-containing protein 2 OS=Rattus norvegicus OX=10116 GN=Isoc2 PE=2 SV=1	35	4	6	3	210	23.1	7.83	14.11	98.8	104.3	111.2	100.1	97.4	96.6	97.9	93.7
P52925	Hmgb2	High mobility group protein B2 OS=Rattus norvegicus OX=10116 GN=Hmgb2 PE=2 SV=2	27	6	6	5	210	24.1	7.39	9.1	93.6	92.5	90.6	90.8	107.4	104.1	113.1	107.9
D4A197	Mcee	Methylmalonyl CoA epimerase OS=Rattus norvegicus OX=10116 GN=Mcee PE=1 SV=1	31	3	4	3	178	18.8	8.82	11.2	103.2	90.2	100.9	101	104.8	95.3	101.8	102.9
Q91V33	Khdrbs1	KH domain-containing, RNA-binding, signal transduction-associated protein 1 OS=Rattus norvegicus OX=10116 GN=Khdrbs1 PE=1 SV=1	12	4	6	4	443	48.3	8.72	10.8	84.9	97	96.3	93.4	105.8	112.5	109.6	100.4
Q4KLI7	Sf3a3	Splicing factor 3a, subunit 3 OS=Rattus norvegicus OX=10116 GN=Sf3a3 PE=1 SV=1	11	4	6	4	501	58.8	5.34	8.28	95.6	97.8	93.9	96.1	105.8	106.9	103.2	100.8
P09895	Rpl5	60S ribosomal protein L5 OS=Rattus norvegicus OX=10116 GN=Rpl5 PE=1 SV=3	17	4	8	4	297	34.4	9.74	14.09	90.6	98.8	92.2	100.5	111.8	109.1	99.5	97.6
D3ZE72	Metap1	Methionine aminopeptidase OS=Rattus norvegicus OX=10116 GN=Metap1 PE=1 SV=1	16	4	6	4	386	43.2	7.17	14.67	94.6	110.3	102.5	96.8	99.2	102.4	96.4	97.8
Q498R7		UPF0587 protein C1orf123 homolog OS=Rattus norvegicus OX=10116 PE=2 SV=1	38	5	6	5	160	18.1	5.12	10.47	100.1	105.4	100.2	103.8	100.4	97.3	98.2	94.6
B4F7A5	Cd99	CD99 molecule (Xg blood group) OS=Rattus norvegicus OX=10116 GN=Cd99 PE=1 SV=1	25	3	4	3	165	16.6	5.12	12.9	93.8	92.5	95.2	94.3	105.8	105.1	111.1	102.1
Q68FT5	Bhmt2	S-methylmethionine--homocysteine S-methyltransferase BHMT2 OS=Rattus norvegicus OX=10116 GN=Bhmt2 PE=2 SV=1	19	6	9	2	363	39.9	6.61	18.83	108.9	114.9	117.7	126.4	88.6	77.9	90.2	75.3
Q642A6	Vwa1	von Willebrand factor A domain-containing protein 1 OS=Rattus norvegicus OX=10116 GN=Vwa1 PE=2 SV=1	17	4	6	4	415	44.8	6.7	11.58	88.7	96.8	102	101.2	101.2	97.9	100.8	111.4
Q5BJY6	Amdhd2	N-acetylglucosamine-6-phosphate deacetylase OS=Rattus norvegicus OX=10116 GN=Amdhd2 PE=3 SV=2	11	3	4	3	409	43.5	6.39	5.89	98.8	104.7	97.8	95	103.3	105.6	96.3	98.5
D3ZX42	Rabgap1	G protein-coupled receptor 21 (Predicted), isoform CRA_a OS=Rattus norvegicus OX=10116 GN=Rabgap1 PE=1 SV=1	7	4	5	4	1065	120.9	5.27	7.41	95.9	100.4	91	95.2	103.7	102.3	101	110.5
D3ZCG3	Mon2	MON2 homolog, regulator of endosome-to-Golgi-trafficking OS=Rattus norvegicus OX=10116 GN=Mon2 PE=1 SV=3	3	5	6	5	1707	188.3	6.2	9.8	99.3	95.4	101.4	99.3	103.2	99.6	97.1	104.7
Q4KLH7	Rad21	RAD21 cohesin complex component OS=Rattus norvegicus OX=10116 GN=Rad21 PE=1 SV=1	10	5	6	5	635	71.9	4.64	12.02	103.3	100.3	102.7	100.8	102.1	96.5	95.7	98.7
D3ZUX5	Chchd3	MICOS complex subunit OS=Rattus norvegicus OX=10116 GN=Chchd3 PE=1 SV=1	30	5	7	5	227	26.4	8.13	16.28	101	100.5	103.4	102.8	102.3	95.7	98.7	95.5
B5DEN5	Eef1b2	Eukaryotic translation elongation factor 1 beta 2 OS=Rattus norvegicus OX=10116 GN=Eef1b2 PE=1 SV=1	14	3	7	2	225	24.7	4.72	13.36	94	107	112.9	96.5	104.1	94.1	97.2	94.3
D3ZVU4	Rbks	Ribokinase OS=Rattus norvegicus OX=10116 GN=Rbks PE=1 SV=1	15	5	8	5	323	34	6.06	11.17	103.2	99	107.2	96.3	100.8	96.4	97	100.1
D3ZV82	LOC685067	Uncharacterized protein OS=Rattus norvegicus OX=10116 GN=LOC685067 PE=1 SV=3	11	5	5	5	626	71.3	5.83	13.77	100.7	92.1	102.9	94.2	105.6	99.1	102.1	103.3
G3V7S0	Folh1	Folate hydrolase OS=Rattus norvegicus OX=10116 GN=Folh1 PE=1 SV=1	11	6	6	6	752	84.6	7.66	12.48	120.6	106.5	115.2	98.1	92.7	86.4	93.1	87.4
D3ZFK9	Amn	Amnion-associated transmembrane protein OS=Rattus norvegicus OX=10116 GN=Amn PE=4 SV=1	12	5	6	5	459	48.8	5.97	12.4	112.3	102.4	95.1	99.8	98.6	99.8	95.3	96.6
A0A096MJP9	Ddi2	DNA damage-inducible 1 homolog 2 OS=Rattus norvegicus OX=10116 GN=Ddi2 PE=1 SV=1	8	5	7	5	986	106	4.83	7.3	100.9	98.5	100.5	96.5	99.4	100.6	99.5	104
F1LM55	Ccar2	Cell cycle and apoptosis regulator 2 OS=Rattus norvegicus OX=10116 GN=Ccar2 PE=1 SV=1	9	6	7	6	922	102.7	5.16	7.23	92.2	99.4	102.5	99	102.2	103.7	102	98.8
G3V6D9	Slc9a3r2	Na(+)/H(+) exchange regulatory cofactor NHE-RF OS=Rattus norvegicus OX=10116 GN=Slc9a3r2 PE=1 SV=1	18	5	5	5	337	37.3	7.58	14.26	92.6	98.9	100.3	101	99.4	98.5	107.3	102.1
Q5HZY0	Ubxn4	UBX domain-containing protein 4 OS=Rattus norvegicus OX=10116 GN=Ubxn4 PE=1 SV=1	16	5	6	5	506	56.4	6.04	10.81	98.5	115.3	107.4	92.2	93.9	95.1	98.1	99.4
P53987	Slc16a1	Monocarboxylate transporter 1 OS=Rattus norvegicus OX=10116 GN=Slc16a1 PE=1 SV=1	7	3	6	3	494	53.2	8.32	9.59	87.5	96.4	87.5	101.1	92.3	109.8	104.4	120.9
F1LRS8	Cd2ap	CD2-associated protein OS=Rattus norvegicus OX=10116 GN=Cd2ap PE=1 SV=2	10	5	7	5	637	70.4	6.38	11.17	100.8	108.5	116.1	98.6	94	88.8	100.9	92.3
A0A0G2JVM2		Uncharacterized protein OS=Rattus norvegicus OX=10116 PE=1 SV=1	5	6	8	6	1377	153.4	5.21	5.67	96.1	103.5	106.1	93.9	95.7	107	101.9	95.9
G3V6R7	Oxsm	3-oxoacyl-[acyl-carrier-protein] synthase, mitochondrial OS=Rattus norvegicus OX=10116 GN=Oxsm PE=1 SV=1	13	4	5	4	456	48	7.34	11.67	104.7	102.5	105.4	101.8	96.9	89	101.2	98.5
Q6P7A9	Gaa	Lysosomal alpha-glucosidase OS=Rattus norvegicus OX=10116 GN=Gaa PE=2 SV=1	4	3	5	2	953	106.1	5.73	11.12	105	102.4	103.7	98.2	97.6	97.9	97.9	97.2
P00406	Mtco2	Cytochrome c oxidase subunit 2 OS=Rattus norvegicus OX=10116 GN=Mtco2 PE=1 SV=3	19	4	13	4	227	25.9	4.73	28.69	103.8	102.4	99.9	101.4	98.8	96.8	98.5	98.3
Q7TT49	Cdc42bpb	Serine/threonine-protein kinase MRCK beta OS=Rattus norvegicus OX=10116 GN=Cdc42bpb PE=1 SV=1	3	5	6	5	1713	194.8	6.46	11.2	99.9	103.8	106.7	96.9	96.4	98.2	98.9	99.2
Q5I0E9	Slc47a1	Multidrug and toxin extrusion protein 1 OS=Rattus norvegicus OX=10116 GN=Slc47a1 PE=1 SV=1	6	2	5	2	566	61.4	6.9	10.98	107	101.9	101.6	106.7	97.2	91	99.7	94.9
P29975	Aqp1	Aquaporin-1 OS=Rattus norvegicus OX=10116 GN=Aqp1 PE=1 SV=4	14	3	10	3	269	28.8	7.83	19.74	107.6	110.3	110.8	106.8	92.2	91	90	91.3
A0JPJ7	Ola1	Obg-like ATPase 1 OS=Rattus norvegicus OX=10116 GN=Ola1 PE=2 SV=1	16	5	8	5	396	44.5	7.77	18.29	95.7	94.2	97.8	98.3	107.9	100.6	102.4	103
E9PU34	Rmnd1	RCG41110 OS=Rattus norvegicus OX=10116 GN=Rmnd1 PE=1 SV=2	12	5	5	5	450	51.7	8.53	10.91	101.1	102.3	102.3	104	101.1	95.9	99.5	93.8
D4A7R0	LOC108348180	Signal recognition particle subunit SRP72 OS=Rattus norvegicus OX=10116 GN=LOC108348180 PE=1 SV=2	10	5	8	5	670	74.6	9.17	8.44	113.3	95.8	112.6	95.9	100.5	99	91.9	91
F1LNZ2	Numb	Protein numb homolog OS=Rattus norvegicus OX=10116 GN=Numb PE=1 SV=3	9	5	5	5	653	70.7	8.98	8.61	98	101.9	110.9	92.2	99	99.1	98	100.9
Q9QYL8	Lypla2	Acyl-protein thioesterase 2 OS=Rattus norvegicus OX=10116 GN=Lypla2 PE=1 SV=1	25	4	6	4	231	24.8	7.23	12.99	95.6	99	93	102.6	107.5	101.2	100.7	100.2
Q5RKI5	Flii	FLII, actin-remodeling protein OS=Rattus norvegicus OX=10116 GN=Flii PE=1 SV=1	5	4	4	4	1270	144.8	6	8.62	100.6	103.9	97.7	90.7	102.9	94.7	102.3	107
D4ABI6	Uchl3	Ubiquitin carboxyl-terminal hydrolase OS=Rattus norvegicus OX=10116 GN=Uchl3 PE=1 SV=2	19	3	6	3	230	26.1	5.11	8.28	97.7	101.6	96.3	98.5	100.8	101.1	103	100.9
Q4G079	Aimp1	Aminoacyl tRNA synthetase complex-interacting multifunctional protein 1 OS=Rattus norvegicus OX=10116 GN=Aimp1 PE=1 SV=1	17	4	6	4	315	34.6	8.29	13.15	98.3	100.5	94.3	97.5	99.2	107.4	99.9	102.9
Q5U2U4	Scamp2	Secretory carrier-associated membrane protein OS=Rattus norvegicus OX=10116 GN=Scamp2 PE=1 SV=1	12	3	5	3	329	36.5	6.32	10.9	103.7	103.4	107.2	101.1	100.5	95.1	95.5	93.6
B2RYQ2	Ptpa	Serine/threonine-protein phosphatase 2A activator OS=Rattus norvegicus OX=10116 GN=Ptpa PE=1 SV=1	23	6	7	6	323	36.6	6.29	13.87	95.7	98.6	99.9	96.1	102.5	99	103.3	105
A0A0G2JWG6	Golgb1	Golgin B1 OS=Rattus norvegicus OX=10116 GN=Golgb1 PE=1 SV=1	2	7	7	7	3228	368.9	5.06	5.79	103.4	103.1	105.3	94.2	98.2	101.6	97	97.2
D3ZLK9	Naxd	ATP-dependent (S)-NAD(P)H-hydrate dehydratase OS=Rattus norvegicus OX=10116 GN=Naxd PE=1 SV=2	14	3	4	3	365	38.7	8.05	9.97	102.2	100.6	104.6	98.2	98.1	104.7	100.3	91.3
P52944	Pdlim1	PDZ and LIM domain protein 1 OS=Rattus norvegicus OX=10116 GN=Pdlim1 PE=1 SV=4	13	4	5	4	327	35.6	7.24	13.03	93.3	95.6	93.1	94.1	105.4	105.1	107.8	105.8
Q8R4A1	Ero1a	ERO1-like protein alpha OS=Rattus norvegicus OX=10116 GN=Ero1a PE=1 SV=1	17	6	6	6	464	54	6.19	10.31	92.8	97.3	96	92.2	103.9	102.3	107.6	107.9
B2RYS8	Ndufb8	NADH dehydrogenase [ubiquinone] 1 beta subcomplex subunit 8, mitochondrial OS=Rattus norvegicus OX=10116 GN=Ndufb8 PE=1 SV=1	37	5	7	5	186	21.9	6.05	8.42	101.9	101.7	102.4	98.2	98.7	103.7	98.6	94.8
A0A0G2JY03		Uncharacterized protein OS=Rattus norvegicus OX=10116 PE=1 SV=1	18	4	6	1	257	28.2	6.27	11.96	80.3	97.1	84.1	96.1	118.6	131.5	97.9	94.4
D4ABK7	Hnrnph3	Heterogeneous nuclear ribonucleoprotein H3 (2H9) (Predicted), isoform CRA_c OS=Rattus norvegicus OX=10116 GN=Hnrnph3 PE=1 SV=1	14	4	6	4	346	36.8	6.87	11.94	93.4	93.4	91.5	92.2	107.6	105.6	107.5	108.8
Q5FWT1	Fam98a	Protein FAM98A OS=Rattus norvegicus OX=10116 GN=Fam98a PE=2 SV=1	10	4	4	3	515	55	8.91	11.89	95.1	92.9	92.2	92.3	105.5	107.9	107	107
G3V8Q8	Sec23ip	RCG40648, isoform CRA_b OS=Rattus norvegicus OX=10116 GN=Sec23ip PE=1 SV=1	4	5	6	4	999	110.9	5.67	13.12	103.1	95.7	97.3	92.8	101.2	103	103.8	103.2
P36506	Map2k2	Dual specificity mitogen-activated protein kinase kinase 2 OS=Rattus norvegicus OX=10116 GN=Map2k2 PE=1 SV=1	21	7	10	4	400	44.3	7.09	13.15	104.4	101.7	104.2	100.2	96.2	97.2	98.7	97.3
F1M6W2	Ermp1	Endoplasmic reticulum metallopeptidase 1 OS=Rattus norvegicus OX=10116 GN=Ermp1 PE=1 SV=1	5	4	5	4	898	99.9	7.49	9.01	121.6	89.1	93.1	92.5	99.1	93.7	105.2	105.6
P61212	Arl1	ADP-ribosylation factor-like protein 1 OS=Rattus norvegicus OX=10116 GN=Arl1 PE=1 SV=1	28	4	7	4	181	20.4	5.72	11.9	98.6	97	101.9	99.6	103.3	98.3	99.8	101.5
A0A0G2JSJ8	Fuca1	Fucosidase, alpha-L-1, tissue, isoform CRA_a OS=Rattus norvegicus OX=10116 GN=Fuca1 PE=1 SV=1	8	3	5	3	462	53.4	6.24	10.82	107.8	98.4	105.5	100.7	95.5	94.5	97.9	99.7
D3ZAS8	Sart3	Squamous cell carcinoma antigen recognized by T-cells 3 OS=Rattus norvegicus OX=10116 GN=Sart3 PE=1 SV=1	8	6	8	6	960	109.4	5.43	13.26	95.7	106.6	105	97	101.2	98.2	96.3	100
Q6PDV8	LOC100360057	60S ribosomal protein L22 OS=Rattus norvegicus OX=10116 GN=LOC100360057 PE=1 SV=1	23	3	9	3	128	14.8	9.19	21.89	109	90.2	94.2	96.4	97.9	102.5	103	106.8
F1LNL2	Smarca5	SWI/SNF related, matrix associated, actin dependent regulator of chromatin, subfamily a, member 5 (Predicted), isoform CRA_a OS=Rattus norvegicus OX=10116 GN=Smarca5 PE=1 SV=2	7	6	7	6	995	116.6	8.41	9.14	97.5	97.7	98.6	92.4	104.3	104.8	100.4	104.3
A0A0H2UHG3	Cul5	Cullin-5 OS=Rattus norvegicus OX=10116 GN=Cul5 PE=1 SV=1	7	6	6	5	855	98.7	8.6	15.4	100.4	102	99.4	99.5	104.3	97.1	100.3	97.1
G3V803	Cdh2	Cadherin-2 OS=Rattus norvegicus OX=10116 GN=Cdh2 PE=1 SV=1	9	5	5	5	906	99.6	4.78	12.29	95.1	101.5	104.3	100.4	99.4	97.6	100	101.7
P81377	Prkar1b	cAMP-dependent protein kinase type I-beta regulatory subunit OS=Rattus norvegicus OX=10116 GN=Prkar1b PE=2 SV=2	9	3	5	1	381	43.3	5.82	12.51	100.9	97.6	95	107.8	96.9	94.1	98.8	109
D3ZC07	Pkn3	Protein SET OS=Rattus norvegicus OX=10116 GN=Pkn3 PE=1 SV=3	4	4	4	4	958	107.1	7.91	9.65	114.6	104.1	105.2	105.2	97.1	87.9	87.4	98.5
A0A0G2JTD9	Rab17	RAB17, member RAS oncogene family OS=Rattus norvegicus OX=10116 GN=Rab17 PE=1 SV=1	25	4	6	4	212	23.3	6.11	12.2	110.5	107.2	110.4	109.8	88.2	91.1	92.1	90.5
Q7TQ16	Uqcrq	Cytochrome b-c1 complex subunit 8 OS=Rattus norvegicus OX=10116 GN=Uqcrq PE=3 SV=1	34	3	10	3	82	9.8	10.52	14.23	101.5	99.3	99.2	100.6	100.8	99.4	99.9	99.1
Q499V1	Upp1	Uridine phosphorylase OS=Rattus norvegicus OX=10116 GN=Upp1 PE=1 SV=1	18	5	5	5	312	34.1	6.73	13.67	96	101.2	95.2	99	99.4	97.5	103.1	108.6
F1LPC7	Hdgf	Hepatoma-derived growth factor OS=Rattus norvegicus OX=10116 GN=Hdgf PE=1 SV=2	14	3	7	3	237	26.4	4.83	11.87	98.4	93.5	99.7	97.9	102.8	99.6	105.9	102.2
Q66H45	Ttc36	Tetratricopeptide repeat protein 36 OS=Rattus norvegicus OX=10116 GN=Ttc36 PE=1 SV=1	16	4	5	4	186	20.1	5.27	8.97	101.8	100.8	104	99.7	100.4	103	94	96.3
D3ZVR7	Fam213b	Prostamide/prostaglandin F synthase OS=Rattus norvegicus OX=10116 GN=Fam213b PE=3 SV=1	29	5	5	5	201	21.6	6.02	14.06	101.3	102.3	102.8	98.6	96.6	96	99.2	103.2
G3V8V1	Grn	Granulin, isoform CRA_c OS=Rattus norvegicus OX=10116 GN=Grn PE=4 SV=1	5	2	5	2	602	65.1	6.73	14.19	88.7	86.8	91.8	91.2	111.5	113.3	105	111.8
Q9QZ86	Nop58	Nucleolar protein 58 OS=Rattus norvegicus OX=10116 GN=Nop58 PE=1 SV=1	8	3	4	3	534	60	8.51	10.03	88.6	98.2	97.8	99	105.7	103.7	106.2	100.9
P0C5H9	Manf	Mesencephalic astrocyte-derived neurotrophic factor OS=Rattus norvegicus OX=10116 GN=Manf PE=1 SV=1	25	5	7	5	179	20.4	8.25	11.4	97.1	90.3	95.7	95.1	107.2	109.5	104.7	100.5
Q5XIE3	Mrpl11	39S ribosomal protein L11, mitochondrial OS=Rattus norvegicus OX=10116 GN=Mrpl11 PE=2 SV=1	21	4	7	4	203	22.4	10.26	13.84	98.3	94.7	100.4	95.6	113	95.3	101	101.7
A0A0G2JVC2	Scyl2	SCY1-like pseudokinase 2 OS=Rattus norvegicus OX=10116 GN=Scyl2 PE=1 SV=1	6	5	6	5	934	103.7	8.13	12.53	97.4	99.4	98.1	93.5	98.9	107.3	103.9	101.6
Q5EBC7	Rabep2	Rab GTPase-binding effector protein 2 OS=Rattus norvegicus OX=10116 GN=Rabep2 PE=1 SV=1	12	5	5	5	554	61.9	4.88	10.86	99.3	99.1	96.2	102.7	96	98.4	108.7	99.6
Q3B8Q1	Ddx21	Nucleolar RNA helicase 2 OS=Rattus norvegicus OX=10116 GN=Ddx21 PE=2 SV=1	6	4	7	4	782	85.9	9.33	11.92	94.4	93.6	99.1	94.9	101.7	101.9	105.9	108.4
A0A0G2JTB2	Gbe1	1,4-alpha-glucan-branching enzyme OS=Rattus norvegicus OX=10116 GN=Gbe1 PE=1 SV=1	7	4	8	4	655	75.7	6.55	10.73	99.3	110.8	107.7	101.4	96	101.9	93.6	89.2
A0A140TAD1	Nudt5	ADP-sugar pyrophosphatase OS=Rattus norvegicus OX=10116 GN=Nudt5 PE=1 SV=1	20	4	7	4	219	24.1	5.38	13.67	102.1	97.5	99.6	100.5	103.1	100.2	98.1	98.9
D3ZYR1	Fcho2	F-BAR domain only protein 2 OS=Rattus norvegicus OX=10116 GN=Fcho2 PE=1 SV=1	10	5	5	5	809	88.7	6.89	5.65	99.8	108.6	110.3	102	101.1	90.8	94.4	93.1
P55053	Fabp5	Fatty acid-binding protein 5 OS=Rattus norvegicus OX=10116 GN=Fabp5 PE=1 SV=3	34	4	5	4	135	15.1	7.18	10.96	102.5	102	105.3	104.4	94.9	94.9	97.3	98.7
A0A0G2K135	Cfi	Complement factor I OS=Rattus norvegicus OX=10116 GN=Cfi PE=1 SV=1	12	6	6	6	626	69.7	7.52	13.18	95.2	94.9	100.2	99.4	104.3	106.1	103.8	96.1
D4A746	Gmppb	GDP-mannose pyrophosphorylase B OS=Rattus norvegicus OX=10116 GN=Gmppb PE=1 SV=1	18	6	8	6	360	39.9	6.74	11.89	102.4	102.2	94.9	98.8	98.9	100.7	99.8	102.3
Q8K4G9	Nphs2	Podocin OS=Rattus norvegicus OX=10116 GN=Nphs2 PE=1 SV=2	15	5	6	5	383	42.4	9.22	13.09	106.6	111.1	112.5	98.8	99	87	100	85
A0A0G2JV54	Ptbp3	Polypyrimidine tract-binding protein 3 OS=Rattus norvegicus OX=10116 GN=Ptbp3 PE=1 SV=1	5	3	5	1	554	59.8	8.94	13.79	88.8	86.5	91.7	87.8	113.8	110.5	108.2	112.6
Q7TMC3	Saa4	Aa2-028 OS=Rattus norvegicus OX=10116 GN=Saa4 PE=1 SV=1	5	4	5	4	830	92.8	5.43	7.36	106.1	101.1	107.1	101.6	97	93.3	99.2	94.5
Q5PQW8	Gbp2	Guanylate binding protein 2 OS=Rattus norvegicus OX=10116 GN=Gbp2 PE=1 SV=1	8	4	6	4	591	67.3	5.62	11.38	98	95	97.5	96.3	101.3	103.9	103.7	104.4
Q5U2T9	Fkbp5	Peptidylprolyl isomerase OS=Rattus norvegicus OX=10116 GN=Fkbp5 PE=1 SV=1	8	3	5	3	456	50.9	6.16	12.69	99.5	95.8	99.8	100.8	103.4	96.8	101.4	102.5
B5DES0	Snrpd2	RCG54604 OS=Rattus norvegicus OX=10116 GN=Snrpd2 PE=1 SV=1	47	5	8	5	118	13.5	9.91	13.25	96.3	96.7	94.1	95.1	103.4	102.6	106.4	105.3
E9PT51	Poldip2	DNA polymerase delta-interacting protein 2 OS=Rattus norvegicus OX=10116 GN=Poldip2 PE=1 SV=3	13	4	7	4	368	41.8	8.63	14.35	98	96.7	96	102.8	101.3	98.2	102.2	104.9
A0JPL2	Csnk1a1	Casein kinase 1, alpha 1, isoform CRA_d OS=Rattus norvegicus OX=10116 GN=Csnk1a1 PE=1 SV=1	19	6	6	6	337	38.9	9.57	13.41	99.2	101.5	99.6	99.7	102.7	98.2	98.2	100.9
A0A0G2K4N7	Mpp6	Membrane palmitoylated protein 6 OS=Rattus norvegicus OX=10116 GN=Mpp6 PE=1 SV=1	10	5	5	5	557	63	6.32	12.24	100.6	101.7	98.8	98.6	99.1	101.4	100.5	99.4
Q7TP58	Bpgm	Phosphoglycerate mutase OS=Rattus norvegicus OX=10116 GN=Bpgm PE=1 SV=1	15	5	6	5	395	45.3	6.92	8.72	111.3	110.2	112.8	106.4	85.5	90.6	93.7	89.6
Q4KLZ0	Vnn1	Vanin 1 OS=Rattus norvegicus OX=10116 GN=Vnn1 PE=1 SV=1	10	4	5	4	512	57	5.55	11.3	112.3	114	116.2	112.9	86.5	87.3	86.2	84.6
D3ZHB5	Serpinb8	Serine (Or cysteine) peptdiase inhibitor, clade B, member 8 (Predicted) OS=Rattus norvegicus OX=10116 GN=Serpinb8 PE=1 SV=1	15	5	7	5	375	42.2	6.21	13.71	97.4	95.8	100	97	104.6	98.9	102.9	103.5
Q5M8C3	Serpina4	Serine (Or cysteine) proteinase inhibitor, clade A (Alpha-1 antiproteinase, antitrypsin), member 4 OS=Rattus norvegicus OX=10116 GN=Serpina4 PE=1 SV=1	14	5	5	5	423	48	8.51	13.05	104.9	96.2	93.3	93.9	98.2	100.3	103.8	109.5
D4ACJ1	LOC100363469	40S ribosomal protein S24 OS=Rattus norvegicus OX=10116 GN=LOC100363469 PE=3 SV=1	23	4	7	4	133	15.4	10.7	13.63	93.5	94.8	92.4	92.1	106.5	105	107.2	108.4
D4A6D9	Hs1bp3	HCLS1-binding protein 3 OS=Rattus norvegicus OX=10116 GN=Hs1bp3 PE=1 SV=1	9	3	5	3	390	43.4	5.14	14.88	96.1	97.4	96.2	101	105.1	103.2	98.7	102.3
A0A0G2JTN4	Pfas	Phosphoribosylformylglycinamidine synthase OS=Rattus norvegicus OX=10116 GN=Pfas PE=1 SV=1	6	5	5	5	1337	144.3	5.73	7.85	98.9	99.3	98	96.8	108.4	98.9	100.5	99
F1LUM5	Tubal3	Tubulin alpha chain OS=Rattus norvegicus OX=10116 GN=Tubal3 PE=1 SV=2	10	3	5	1	382	42.8	6.02	7.06	92.3	99	100.2	93	106.5	98.3	115.6	95.2
Q6AYG5	Echdc1	Ethylmalonyl-CoA decarboxylase OS=Rattus norvegicus OX=10116 GN=Echdc1 PE=1 SV=1	23	6	6	6	299	32.6	7.03	12.34	102.4	97	103	98.3	98.9	100.8	98.4	101.2
B0BMY7	Twf2	Protein tyrosine kinase 9-like (A6-related protein) (Predicted), isoform CRA_b OS=Rattus norvegicus OX=10116 GN=Twf2 PE=1 SV=1	20	4	5	4	349	39.4	6.8	10.66	105.3	122.4	124.5	87.1	82.3	94	88.4	96
B2GUZ9	Fam49b	Fam49b protein OS=Rattus norvegicus OX=10116 GN=Fam49b PE=1 SV=1	16	4	6	4	324	36.8	6.06	8.19	94.3	92.8	100.5	90.7	109.4	103.6	102.2	106.5
F1M9Y9	Rbpms	RNA-binding protein, mRNA-processing factor OS=Rattus norvegicus OX=10116 GN=Rbpms PE=1 SV=2	14	3	5	3	220	24.3	6.19	14.57	101.8	93.4	98.5	88.4	107.6	104.2	103.4	102.8
D3ZZN4		Uncharacterized protein OS=Rattus norvegicus OX=10116 PE=3 SV=1	32	4	8	4	110	12.6	11.05	14.68	94.1	106.4	100.7	96.7	100.2	101.8	101.7	98.5
B0BN83	Armc1	Armadillo repeat-containing protein 1 OS=Rattus norvegicus OX=10116 GN=Armc1 PE=1 SV=1	21	5	5	5	282	31.2	5.57	13.16	100.8	97.2	105.9	92.2	96.7	97.7	109.5	100
Q4G064	Coq5	2-methoxy-6-polyprenyl-1,4-benzoquinol methylase, mitochondrial OS=Rattus norvegicus OX=10116 GN=Coq5 PE=2 SV=1	21	4	6	4	327	37.3	8.81	9.67	106	106.8	108.5	92.5	98.7	97.8	92.2	97.6
Q5XI86	Ptrh2	Peptidyl-tRNA hydrolase 2 OS=Rattus norvegicus OX=10116 GN=Ptrh2 PE=1 SV=1	20	2	4	2	181	19.5	7.42	6.7	101.8	98.3	98.7	93.6	100.6	101.3	104.9	100.8
O54783	Chkb	Choline/ethanolamine kinase OS=Rattus norvegicus OX=10116 GN=Chkb PE=1 SV=3	10	3	4	3	394	45.1	5.33	11.96	101.3	97.6	104.3	99.9	101.2	98.2	99.8	97.7
O88637	Pcyt2	Ethanolamine-phosphate cytidylyltransferase OS=Rattus norvegicus OX=10116 GN=Pcyt2 PE=1 SV=1	14	5	6	5	404	45.2	6.67	9.2	103.1	99	98.2	100.3	103.5	94.4	100	101.5
A0A0G2K1L0	Tnc	Tenascin C OS=Rattus norvegicus OX=10116 GN=Tnc PE=1 SV=1	4	5	5	5	2019	221.6	4.92	10.66	83.2	92.5	102	86.8	107.8	107.3	109.8	110.7
D4A4W6	Slirp	RCG20695, isoform CRA_b OS=Rattus norvegicus OX=10116 GN=Slirp PE=1 SV=1	28	3	5	3	111	12.6	7.65	8.44	101.6	105.8	101.8	90.1	100.2	100.6	97.9	102
Q9QX69	Lancl1	LanC-like protein 1 OS=Rattus norvegicus OX=10116 GN=Lancl1 PE=1 SV=2	13	4	6	3	399	45.2	7.65	15.26	105.5	95.3	99.8	102.9	100.3	99.9	99.6	96.7
D3ZHV7	Sdsl	Serine dehydratase-like OS=Rattus norvegicus OX=10116 GN=Sdsl PE=1 SV=3	20	5	5	5	329	34.9	6.54	14.19	117.3	101	101.1	101	96.4	94.9	96.1	92.3
Q9JHL4	Dbnl	Drebrin-like protein OS=Rattus norvegicus OX=10116 GN=Dbnl PE=1 SV=1	14	4	6	4	436	48.6	4.92	9.62	99.6	91.6	103	93.8	102.1	107.3	101.2	101.4
D3ZM21	Comtd1	Catechol-O-methyltransferase domain containing 1 (Predicted), isoform CRA_a OS=Rattus norvegicus OX=10116 GN=Comtd1 PE=1 SV=1	15	2	5	2	262	29	8.76	10.74	95.7	90.3	93	101.7	103.2	102.6	103.1	110.4
G3V6Q6	Gna11	Guanine nucleotide binding protein, alpha 11 OS=Rattus norvegicus OX=10116 GN=Gna11 PE=1 SV=1	16	5	5	4	359	42	6.29	12.54	97	98.6	104	103.4	102.4	101.2	99.2	94.3
D3ZNQ6	Ube2m	Ubiquitin-conjugating enzyme E2M OS=Rattus norvegicus OX=10116 GN=Ube2m PE=1 SV=1	30	5	7	5	183	20.9	7.69	4.29	96.3	98.4	98.1	98.1	106.8	100.3	100.5	101.4
G3V616	Cuta	Divalent cation tolerant protein CUTA, isoform CRA_b OS=Rattus norvegicus OX=10116 GN=Cuta PE=1 SV=1	29	5	6	4	177	18.7	7.34	9.71	94.8	99.6	103.7	96.6	100.1	99.5	103.6	102
D3ZUV3	Eif2a	Eukaryotic translation initiation factor 2A OS=Rattus norvegicus OX=10116 GN=Eif2a PE=1 SV=3	14	6	6	6	589	65.3	8.91	9.91	98.3	108.3	112.2	99.8	101.1	91.2	95	94.1
A0A0G2KA25	Tm9sf4	Transmembrane 9 superfamily member OS=Rattus norvegicus OX=10116 GN=Tm9sf4 PE=1 SV=1	8	4	6	4	643	74.7	7.06	10.62	104.7	94	98.6	95.2	103.8	99.6	102.5	101.7
Q568Z6	Ist1	IST1 homolog OS=Rattus norvegicus OX=10116 GN=Ist1 PE=2 SV=1	13	4	5	4	366	39.9	5.44	11.46	93.9	97.1	100.1	97.3	101.4	101.3	105.6	103.2
B2GV73	Arpc3	Actin-related protein 2/3 complex subunit 3 OS=Rattus norvegicus OX=10116 GN=Arpc3 PE=1 SV=1	16	3	12	3	178	20.5	8.6	26.61	91.5	95.9	95.3	94.7	106	109.2	103.9	103.5
G3V9V9	Csrp2	Cysteine and glycine-rich protein 2 OS=Rattus norvegicus OX=10116 GN=Csrp2 PE=1 SV=1	17	3	4	3	193	20.9	8.62	8.42	87.9	112.5	103.8	93	100.8	99.5	101.2	101.3
B0BNM1	Naxe	NAD(P)H-hydrate epimerase OS=Rattus norvegicus OX=10116 GN=Naxe PE=2 SV=1	18	4	7	4	282	30.9	6.89	15.82	111.2	103.6	94.1	94.2	97.9	97.6	99.9	101.5
Q9QXT3	Nat8	N-acetyltransferase 8 OS=Rattus norvegicus OX=10116 GN=Nat8 PE=1 SV=1	30	5	7	3	222	24.9	9.06	14.73	106.3	101.2	110.2	98.9	95.4	90.2	94.6	103.2
F7FHF3	Serpinf2	Serpin family F member 2 OS=Rattus norvegicus OX=10116 GN=Serpinf2 PE=1 SV=1	8	4	7	4	554	62.3	6.8	19.3	98.7	102.8	105.1	96.7	98.6	97.7	101.3	99
Q6AY30	Sccpdh	Saccharopine dehydrogenase-like oxidoreductase OS=Rattus norvegicus OX=10116 GN=Sccpdh PE=1 SV=1	13	4	6	4	429	47.1	8.84	11.85	112.7	92.3	98.2	95.1	110.8	104.3	91.1	95.4
D3ZAF6	Atp5j2	ATP synthase subunit f, mitochondrial OS=Rattus norvegicus OX=10116 GN=Atp5j2 PE=1 SV=1	31	3	10	3	88	10.4	10.04	25.55	98.3	99.4	104	102.6	98.9	98.9	100.3	97.6
D4AE02		Uncharacterized protein OS=Rattus norvegicus OX=10116 PE=1 SV=3	11	4	4	3	433	46.4	8.4	6.7	98.9	96.4	96.2	98.5	100.4	97.5	105.1	107
P63045	Vamp2	Vesicle-associated membrane protein 2 OS=Rattus norvegicus OX=10116 GN=Vamp2 PE=1 SV=2	28	2	3	1	116	12.7	8.13	9.45	91.7	92.4	110.4	102.7	101.3	99.9	105.3	96.4
P62856	Rps26	40S ribosomal protein S26 OS=Rattus norvegicus OX=10116 GN=Rps26 PE=3 SV=3	40	4	9	4	115	13	11	16.78	95.1	100.1	101	96.5	102.9	101.1	101.7	101.6
A0A0G2K2P6	Hbs1l	HBS1-like protein OS=Rattus norvegicus OX=10116 GN=Hbs1l PE=1 SV=1	9	4	6	4	679	74.8	6.6	8.15	105.6	105	99.8	97.4	95	99.4	92.7	105
Q4V898	Rbmx	RNA-binding motif protein, X chromosome OS=Rattus norvegicus OX=10116 GN=Rbmx PE=1 SV=1	13	5	7	1	390	42.2	10.05	11.12	99	92.2	90.6	96.4	106	107.2	107.1	101.5
P21571	Atp5j	ATP synthase-coupling factor 6, mitochondrial OS=Rattus norvegicus OX=10116 GN=Atp5j PE=1 SV=1	29	4	10	4	108	12.5	9.44	9.8	101.8	100.3	100.6	105.2	97.8	95.6	100.4	98.3
A0A0G2JU25	Galnt2	Polypeptide N-acetylgalactosaminyltransferase OS=Rattus norvegicus OX=10116 GN=Galnt2 PE=1 SV=1	12	6	6	6	542	61.8	7.94	7.48	103.7	97.6	102.7	104.4	97.5	94.1	103.3	96.6
Q5RK30	Sbds	Ribosome maturation protein SBDS OS=Rattus norvegicus OX=10116 GN=Sbds PE=2 SV=1	18	4	6	4	250	28.7	8.75	13.81	99	95.6	96.2	100.2	99.2	103.7	106	100.1
A0A0G2K2B5	Asph	Aspartate-beta-hydroxylase OS=Rattus norvegicus OX=10116 GN=Asph PE=1 SV=1	9	5	5	5	789	89.5	4.84	8.55	106.5	100.2	98.9	97.3	105.1	100.4	100.4	91.2
Q6AYG3	Prune1	Exopolyphosphatase PRUNE1 OS=Rattus norvegicus OX=10116 GN=Prune1 PE=1 SV=1	11	3	3	3	454	50	5.07	9.97	98	97.9	102.4	96.1	101.5	96.6	112.4	95.1
P17988	Sult1a1	Sulfotransferase 1A1 OS=Rattus norvegicus OX=10116 GN=Sult1a1 PE=1 SV=1	11	3	4	3	291	33.9	6.86	12.37	98.2	101.1	101.9	97.7	100	99.1	99.5	102.5
G3V6U9	Setd3	Histone-lysine N-methyltransferase OS=Rattus norvegicus OX=10116 GN=Setd3 PE=1 SV=1	10	5	6	5	596	67.4	5.41	10.28	100	101.4	104.4	94.3	101	100.6	95.8	102.6
F7EPZ4	Dis3	DIS3 homolog, exosome endoribonuclease and 3'-5' exoribonuclease OS=Rattus norvegicus OX=10116 GN=Dis3 PE=1 SV=1	4	3	4	3	1025	116.7	7.97	9.91	93.6	102.3	110.9	94.6	99.7	99.9	95.4	103.5
Q6P7S1	Asah1	Acid ceramidase OS=Rattus norvegicus OX=10116 GN=Asah1 PE=1 SV=1	16	7	9	7	394	44.4	8.31	17.21	95	94.8	95.3	92	108.5	104.4	102.4	107.6
D3ZLA3	Cpne3	Copine 3 OS=Rattus norvegicus OX=10116 GN=Cpne3 PE=1 SV=1	11	6	7	6	533	59.6	5.68	9.22	98.8	98.3	94	95.8	104.2	100.8	105.3	102.9
P61314	Rpl15	60S ribosomal protein L15 OS=Rattus norvegicus OX=10116 GN=Rpl15 PE=1 SV=2	18	4	7	4	204	24.1	11.62	17.07	98.1	99	97.1	97.7	100.2	100.8	102.3	104.7
M0R5N4	Pfdn4	Prefoldin subunit 4 OS=Rattus norvegicus OX=10116 GN=Pfdn4 PE=1 SV=2	28	3	5	3	139	15.8	4.73	14.57	99.6	98.9	100.4	102.5	100	102.7	95.2	100.8
Q496Z0	Elp2	Elongator complex protein 2 OS=Rattus norvegicus OX=10116 GN=Elp2 PE=2 SV=1	7	4	5	4	821	91.7	5.87	9.18	96.7	106.7	94.2	97.1	99.6	100.2	101.1	104.5
Q8CHN6	Sgpl1	Sphingosine-1-phosphate lyase 1 OS=Rattus norvegicus OX=10116 GN=Sgpl1 PE=2 SV=1	7	4	5	4	568	63.7	9.17	12.72	95.6	99.2	99.3	95.2	104.7	97.8	102.8	105.3
O88563	Abcc3	Canalicular multispecific organic anion transporter 2 OS=Rattus norvegicus OX=10116 GN=Abcc3 PE=1 SV=1	5	6	6	5	1522	168.9	6.96	5.9	97.8	100	108.2	97.2	98.4	97.7	101.2	99.6
B5DF46	Pmm2	Phosphomannomutase OS=Rattus norvegicus OX=10116 GN=Pmm2 PE=1 SV=1	13	3	6	3	242	27.7	7.3	14.53	100.9	107.5	106.6	96	99.1	101.2	95.4	93.3
D3Z9J8	Sat2	Spermidine/spermine N1-acetyl transferase 2 (Predicted), isoform CRA_a OS=Rattus norvegicus OX=10116 GN=Sat2 PE=1 SV=1	23	4	9	4	170	19.3	7.21	21.58	106.8	104.3	103.6	100.2	94.8	99.1	96.6	94.6
A0A0G2K427	Ivns1abp	Influenza virus NS1A binding protein (Predicted), isoform CRA_b OS=Rattus norvegicus OX=10116 GN=Ivns1abp PE=1 SV=1	9	6	7	6	642	71.5	5.41	10.26	101.4	104.5	104.5	93.3	99.6	98.5	98.2	100
A0A0G2JUX4	Usp47	Ubiquitin-specific peptidase 47 OS=Rattus norvegicus OX=10116 GN=Usp47 PE=1 SV=1	4	4	4	4	1375	157.2	5.12	9.72	102	104.1	117	95.1	98.1	91.6	93.4	98.5
G3V8G0	Slc12a3	Solute carrier family 12 member 3 OS=Rattus norvegicus OX=10116 GN=Slc12a3 PE=4 SV=1	6	4	5	4	1002	110.5	7.47	8.52	103.2	109.4	108.2	101.9	96.8	95.4	93.9	91.2
A0A0H2UHZ2	Nap1l4	Nucleosome assembly protein 1-like 4 OS=Rattus norvegicus OX=10116 GN=Nap1l4 PE=1 SV=1	11	3	6	2	387	44	4.74	10.4	95	97.1	102.1	100	102.4	103	104.7	95.7
D3ZWA8	Appl1	Adaptor protein, phosphotyrosine-interacting with PH domain and leucine zipper 1 OS=Rattus norvegicus OX=10116 GN=Appl1 PE=1 SV=3	11	5	5	5	671	75.4	5.68	13.44	102.4	104.6	101.5	95.5	102.5	94.3	98.7	100.6
F7FHF7	LOC100911485	Mitofusin-2 OS=Rattus norvegicus OX=10116 GN=LOC100911485 PE=1 SV=1	9	5	5	4	762	86.8	6.95	7.97	92.4	98.8	93.2	103.4	99.3	101.2	104.3	107.2
P63329	Ppp3ca	Serine/threonine-protein phosphatase 2B catalytic subunit alpha isoform OS=Rattus norvegicus OX=10116 GN=Ppp3ca PE=1 SV=1	11	5	6	5	521	58.6	5.86	9.66	97.5	100.8	98.2	95	101.1	103.5	103.7	100.1
Q5BJQ0	Coq8a	Atypical kinase COQ8A, mitochondrial OS=Rattus norvegicus OX=10116 GN=Coq8a PE=2 SV=1	9	3	4	3	649	72.2	6.46	9.73	100.8	94.6	101.8	93.4	105.6	100.7	105.4	97.6
B0BN56	Mrps31	28S ribosomal protein S31, mitochondrial OS=Rattus norvegicus OX=10116 GN=Mrps31 PE=2 SV=1	16	5	7	5	387	43.9	8.28	4.48	101.3	100.9	96.1	99.4	107.7	99.4	101.5	93.6
B5DEQ3	Xpnpep3	Xaa-Pro aminopeptidase 3 OS=Rattus norvegicus OX=10116 GN=Xpnpep3 PE=1 SV=1	9	3	4	3	506	56.4	7.14	8.16	101.4	101.5	99.1	99	102	93.3	100.1	103.5
A0A0H2UHF6	Arl6ip5	PRA1 family protein OS=Rattus norvegicus OX=10116 GN=Arl6ip5 PE=1 SV=1	15	3	6	3	207	23.6	9.6	7.7	93.3	97.7	89.6	96	105.5	107.8	102.4	107.8
A0A0G2K5N6	Rock2	Rho-associated protein kinase OS=Rattus norvegicus OX=10116 GN=Rock2 PE=1 SV=1	5	7	7	6	1388	160.5	5.99	9.65	97.9	97.2	97.8	98.2	104.8	101.7	102.7	99.6
Q62703	Rcn2	Reticulocalbin-2 OS=Rattus norvegicus OX=10116 GN=Rcn2 PE=1 SV=2	15	4	5	4	320	37.4	4.41	12.21	99.6	97.6	106.3	88.4	95.3	105.6	104.4	102.8
Q5PPG7	Eif2d	Eukaryotic translation initiation factor 2D OS=Rattus norvegicus OX=10116 GN=Eif2d PE=1 SV=1	7	2	3	2	570	62.6	7.78	9.76	106.5	97.5	109.4	101.6	96.7	99.8	94.1	94.3
Q00238	Icam1	Intercellular adhesion molecule 1 OS=Rattus norvegicus OX=10116 GN=Icam1 PE=2 SV=1	12	5	5	5	545	60.1	6.95	7.73	95.5	99.7	107.3	91.4	101.1	97.5	101.8	105.7
G3V7G9	Eif3l	Eukaryotic translation initiation factor 3, subunit 6 interacting protein OS=Rattus norvegicus OX=10116 GN=Eif3l PE=1 SV=2	9	3	7	3	382	45.1	9.03	16.11	104.7	94.1	98.7	96.8	97.8	101.9	100.4	105.6
Q5FVQ6	MGC108823	Interferon-gamma-inducible GTPase Ifgga3 protein OS=Rattus norvegicus OX=10116 GN=MGC108823 PE=1 SV=1	13	3	4	3	417	48.2	6.19	13.95	94.8	101.1	93.6	91.5	101.2	105.4	107.8	104.7
P08081	Clta	Clathrin light chain A OS=Rattus norvegicus OX=10116 GN=Clta PE=1 SV=1	16	5	11	4	248	27	4.5	22.77	95.7	95.2	110.7	94.5	101	100.6	103.2	99
F1M446	Ecpas	Similar to KIAA0368 OS=Rattus norvegicus OX=10116 GN=Ecpas PE=1 SV=3	3	5	5	5	1839	203.8	7.14	7.97	160	91.2	103.5	87.9	88.8	94.1	89.3	85.2
A0A0G2JU15	Ptcd3	Pentatricopeptide repeat domain 3 OS=Rattus norvegicus OX=10116 GN=Ptcd3 PE=1 SV=1	8	4	5	4	747	84.5	6.62	7.47	106.4	97.5	102.5	95.6	103.5	104.6	95.4	94.6
Q5I0L4	Nubp1	Cytosolic Fe-S cluster assembly factor NUBP1 OS=Rattus norvegicus OX=10116 GN=Nubp1 PE=1 SV=1	14	4	5	4	320	34	6.07	8.62	95.9	103.7	95.1	101.9	101.6	100.1	101.1	100.5
Q5U214	Snrpa	Small nuclear ribonucleoprotein polypeptide A OS=Rattus norvegicus OX=10116 GN=Snrpa PE=1 SV=1	12	3	4	2	281	31.2	9.83	11.15	98.2	95.8	94.9	89.3	105	106.1	102.9	107.8
M0R6H1	LOC688286	Similar to threonine aldolase 1 OS=Rattus norvegicus OX=10116 GN=LOC688286 PE=1 SV=2	8	3	5	3	399	43.3	7.28	13.09	104.7	110.1	104.2	104.5	94.4	94.7	93.2	94.1
Q5XI81	Fxr1	Fragile X mental retardation syndrome-related protein 1 OS=Rattus norvegicus OX=10116 GN=Fxr1 PE=1 SV=1	10	4	6	3	568	63.9	6.39	18.53	101.2	105.1	98.9	103.9	96.1	97.5	99.1	98.3
Q10743	Adam10	Disintegrin and metalloproteinase domain-containing protein 10 OS=Rattus norvegicus OX=10116 GN=Adam10 PE=1 SV=2	9	5	7	5	749	84	7.77	6.32	97.3	108.1	100.5	95.5	96.2	95.3	99.7	107.4
Q4KLL0	Tcea1	Transcription elongation factor A protein 1 OS=Rattus norvegicus OX=10116 GN=Tcea1 PE=1 SV=1	20	5	6	5	301	33.9	8.38	9.25	101.3	91.9	94.3	99.4	107.7	100.3	106.2	98.8
Q4V8E2	Psmd14	Proteasome (Prosome, macropain) 26S subunit, non-ATPase, 14 OS=Rattus norvegicus OX=10116 GN=Psmd14 PE=1 SV=1	18	6	8	6	310	34.6	6.52	19.67	97.9	101	100.4	94	104.4	102	100	100.5
F1LQN3	Rtn4	Reticulon OS=Rattus norvegicus OX=10116 GN=Rtn4 PE=1 SV=1	4	2	5	2	1163	126.3	4.49	6.25	101.5	98.9	94.3	100.7	97.8	107.7	99.4	99.7
D3ZSL2	Abracl	ABRA C-terminal-like OS=Rattus norvegicus OX=10116 GN=Abracl PE=1 SV=1	27	2	6	2	81	9	5.8	13.03	92	94.5	93.8	99.8	105.6	112.4	102.4	99.6
B2RYM3	Itih1	Inter-alpha trypsin inhibitor, heavy chain 1 OS=Rattus norvegicus OX=10116 GN=Itih1 PE=1 SV=1	4	2	4	2	904	100.5	6.86	11.22	97.4	98.8	96.6	102.5	102	100.4	99.6	102.7
Q6P9U3	Commd3	COMM domain-containing protein 3 OS=Rattus norvegicus OX=10116 GN=Commd3 PE=1 SV=1	17	2	4	2	195	21.9	5.58	9.08	99.2	99.3	93.9	95.2	104.2	102.4	108.8	97
P63025	Vamp3	Vesicle-associated membrane protein 3 OS=Rattus norvegicus OX=10116 GN=Vamp3 PE=1 SV=1	32	2	3	1	103	11.5	8.5	8.11	101	110.3	89.1	112.8	101.7	106.5	86.6	92
P63100	Ppp3r1	Calcineurin subunit B type 1 OS=Rattus norvegicus OX=10116 GN=Ppp3r1 PE=1 SV=2	18	3	4	3	170	19.3	4.81	6.28	88.6	90.4	89.1	90.8	113.4	108.3	109.3	110
E9PU28	Impdh2	Inosine-5'-monophosphate dehydrogenase 2 OS=Rattus norvegicus OX=10116 GN=Impdh2 PE=1 SV=1	11	4	5	4	514	55.8	7.28	10.64	102.1	97.8	97.1	99.7	96.9	102.8	100.5	103.2
P62859	Rps28	40S ribosomal protein S28 OS=Rattus norvegicus OX=10116 GN=Rps28 PE=1 SV=1	46	3	4	3	69	7.8	10.7	11.67	94	92.5	89.9	89.3	112.8	111.7	107.3	102.5
O35964	Sh3gl1	Endophilin-A2 OS=Rattus norvegicus OX=10116 GN=Sh3gl1 PE=1 SV=1	13	4	5	4	368	41.5	5.6	13.02	122.2	98	101.2	92.1	98.7	92.4	97.4	98.1
Q63524	Tmed2	Transmembrane emp24 domain-containing protein 2 OS=Rattus norvegicus OX=10116 GN=Tmed2 PE=1 SV=1	23	5	6	5	201	22.7	5.17	4.84	99.5	101.2	97.5	93.5	102.2	102.3	102.1	101.7
D4A9L2	Srsf1	RCG34610, isoform CRA_c OS=Rattus norvegicus OX=10116 GN=Srsf1 PE=1 SV=1	29	5	7	5	248	27.7	10.36	13.05	93.4	101.4	103.2	95.6	98.6	103.2	100.9	103.8
P40307	Psmb2	Proteasome subunit beta type-2 OS=Rattus norvegicus OX=10116 GN=Psmb2 PE=1 SV=1	13	2	6	2	201	22.9	7.44	18.06	103.9	97.7	94.7	96	101.5	101.5	103.7	101
P50115	S100a8	Protein S100-A8 OS=Rattus norvegicus OX=10116 GN=S100a8 PE=1 SV=3	30	3	8	3	89	10.2	6.05	17.18	111.9	116.8	116	109.3	89.2	86.1	85.7	85
Q5I0P2	Gcsh	Glycine cleavage system H protein, mitochondrial OS=Rattus norvegicus OX=10116 GN=Gcsh PE=2 SV=1	22	2	6	2	170	18.5	5.01	10.45	104.1	104.5	105.1	104.3	101	97.7	94.8	88.5
P07151	B2m	Beta-2-microglobulin OS=Rattus norvegicus OX=10116 GN=B2m PE=1 SV=1	12	2	5	2	119	13.7	8	5.94	99.6	101	107.9	93.9	100.3	101	99.5	96.8
Q99PV2	Stxbp3	Syntaxin binding protein 3, isoform CRA_a OS=Rattus norvegicus OX=10116 GN=Stxbp3 PE=1 SV=1	8	4	4	4	593	68	8.02	9.77	103.5	102.5	109.9	101.4	93.3	98.2	94.5	96.6
A0A0G2K8K9	Rbmxl1b	RNA binding motif protein, X-linked-like 1B OS=Rattus norvegicus OX=10116 GN=Rbmxl1b PE=4 SV=1	11	4	8	1	388	42.3	9.89	10.57	101.1	88	94.2	93.8	103.6	105.3	112.2	101.8
A0A0G2K7M2	Rad23a	RAD23 homolog A, nucleotide excision repair protein OS=Rattus norvegicus OX=10116 GN=Rad23a PE=1 SV=1	23	4	5	3	362	39.5	4.58	11.78	86.1	97.1	95.3	93.8	108	107.6	106.4	105.6
Q9EQH5	Ctbp2	C-terminal-binding protein 2 OS=Rattus norvegicus OX=10116 GN=Ctbp2 PE=1 SV=2	11	6	6	2	445	49	6.95	7.34	97	99.6	96.5	99.6	107.3	101.2	98.6	100.2
A2IBE2	Car12	Carbonic anhydrase 12 OS=Rattus norvegicus OX=10116 GN=Car12 PE=2 SV=1	14	3	5	3	354	39.5	7.11	10.94	99.9	99.1	104.1	100.2	99.1	100.9	99.4	97.4
A0A0G2JWD0	Prom1	Prominin 1 OS=Rattus norvegicus OX=10116 GN=Prom1 PE=4 SV=1	7	5	5	5	866	97.5	6.55	3.92	100.7	101.3	103.1	102.6	100.6	95	98.5	98.2
Q4FZV0	Manba	Beta-mannosidase OS=Rattus norvegicus OX=10116 GN=Manba PE=2 SV=1	5	5	7	5	881	101.2	7.24	15.27	104.6	97.1	103.8	98.6	101.1	99.5	98.9	96.4
Q5PQJ6	Pycr3	Pyrroline-5-carboxylate reductase 3 OS=Rattus norvegicus OX=10116 GN=Pycr3 PE=2 SV=1	14	3	6	3	274	28.9	7.06	7.77	103.4	102.4	101.3	97.5	98.7	98.6	98.3	99.7
D4A9Z8	Chmp4bl1	Chromatin-modifying protein 4B-like 1 OS=Rattus norvegicus OX=10116 GN=Chmp4bl1 PE=1 SV=1	21	4	7	1	224	25.1	4.91	13.76	106	93.1	96.7	102.4	106	101	97.5	97.3
A0A0G2JY73	Eif4g3	Eukaryotic translation initiation factor 4 gamma, 3 OS=Rattus norvegicus OX=10116 GN=Eif4g3 PE=1 SV=1	3	5	6	3	1614	179	5.85	7.49	100	102.8	107	90.3	102.6	94.3	101.9	101.2
Q8CGU6	Ncstn	Nicastrin OS=Rattus norvegicus OX=10116 GN=Ncstn PE=1 SV=1	6	2	4	2	708	78.4	5.77	9.49	87.7	71.1	93.2	92.7	103.4	104.7	125.2	122
A0A140UHY3	Ewsr1	RNA-binding protein EWS-like OS=Rattus norvegicus OX=10116 GN=Ewsr1 PE=1 SV=1	9	5	9	5	661	68.9	9.29	11.72	91.9	91	91.8	93.6	107.2	107	109.6	107.9
D4AEG2	Rab32	RAB32, member RAS oncogene family OS=Rattus norvegicus OX=10116 GN=Rab32 PE=1 SV=1	21	4	4	3	223	25.2	7.37	10.22	124.5	109.7	105.2	112.4	81.5	90.5	91.3	84.9
P29117	Ppif	Peptidyl-prolyl cis-trans isomerase F, mitochondrial OS=Rattus norvegicus OX=10116 GN=Ppif PE=1 SV=2	16	5	6	4	206	21.8	9.14	11.48	102.1	96.2	96.7	100.2	100	100.3	102.1	102.6
D4A7R3	Nup205	Nucleoporin 205 OS=Rattus norvegicus OX=10116 GN=Nup205 PE=1 SV=1	3	5	5	5	2008	227.1	6.32	9.53	108.4	113.9	112.2	100.7	85.9	94.5	86.6	97.8
A0A0G2KB11	Stard10	StAR-related lipid transfer domain-containing 10 OS=Rattus norvegicus OX=10116 GN=Stard10 PE=1 SV=1	12	3	5	3	363	40.2	9.04	7.85	99.6	100.1	95	92.5	109.6	107.9	98.6	96.6
Q4FZU0	Acp6	Acid phosphatase 6, lysophosphatidic OS=Rattus norvegicus OX=10116 GN=Acp6 PE=1 SV=1	13	5	5	5	413	47.3	7.75	12.19	101.9	104.5	103.7	96.3	99.4	99.7	96.5	97.9
A0A0G2JVP5	Paip1	Poly(A)-binding protein-interacting protein 1 OS=Rattus norvegicus OX=10116 GN=Paip1 PE=1 SV=1	11	3	4	3	400	45.7	4.55	4.92	99.2	94.8	95.8	94.2	102.2	101.6	106.4	105.7
G3V8P2	As3mt	Arsenic (+3 oxidation state) methyltransferase, isoform CRA_a OS=Rattus norvegicus OX=10116 GN=As3mt PE=1 SV=1	13	4	4	4	369	41	6.61	11.59	99.2	94.7	91.8	104	93.4	105	104	108
A0A0G2JVD6	Kmt2d	5'-AMP-activated protein kinase subunit gamma-1 OS=Rattus norvegicus OX=10116 GN=Kmt2d PE=1 SV=1	1	4	5	4	5840	628.4	5.87	9.37	100.8	98	99.2	97.3	103	100.8	100.2	100.8
P04916	Rbp4	Retinol-binding protein 4 OS=Rattus norvegicus OX=10116 GN=Rbp4 PE=1 SV=1	23	4	6	4	201	23.2	5.99	6.56	103.3	110.5	102.1	99.2	97.7	102.7	93.5	91.1
Q08877	Dnm3	Dynamin-3 OS=Rattus norvegicus OX=10116 GN=Dnm3 PE=1 SV=2	5	3	4	1	869	97.9	8.35	8.04	111.2	101.9	104.7	87.8	101.6	104.8	102	86
F1LSK6	Cyp20a1	Cytochrome P450 20A1 OS=Rattus norvegicus OX=10116 GN=Cyp20a1 PE=1 SV=1	11	4	5	4	462	51.9	6.76	8.12	104.1	92.5	96.4	94.7	109.2	94.6	103.1	105.5
A0A0G2K2P3	Tnfaip8	TNF alpha-induced protein 8 OS=Rattus norvegicus OX=10116 GN=Tnfaip8 PE=4 SV=1	16	3	5	3	192	22.2	8.92	13.93	98.9	101.9	102	103.5	104.7	96.4	94.8	97.9
G3V7B5	Prpsap1	Phosphoribosyl pyrophosphate synthase-associated protein 1 OS=Rattus norvegicus OX=10116 GN=Prpsap1 PE=1 SV=1	12	3	4	2	385	42.5	8.32	7.9	100.1	104.3	104.5	91	99.2	103.9	96.3	100.7
Q5EB77	Rab18	Ras-related protein Rab-18 OS=Rattus norvegicus OX=10116 GN=Rab18 PE=2 SV=1	22	4	6	4	206	23	5.24	12.2	97.5	95.2	93.8	98.5	105	98.5	105.4	106.1
B0BMT9	Sqor	Sqrdl protein OS=Rattus norvegicus OX=10116 GN=Sqor PE=1 SV=1	12	4	5	4	450	50.2	9.07	9.52	105.4	97.8	101.9	95	104.2	102.9	97.4	95.5
Q7TP51	Ube4a	Ab2-232 OS=Rattus norvegicus OX=10116 GN=Ube4a PE=1 SV=1	6	4	4	4	1085	124.3	5.24	8.89	102.8	105.8	99.3	92	101.7	99.8	96	102.5
B2GUZ6	Rtn4ip1	Reticulon 4-interacting protein 1 OS=Rattus norvegicus OX=10116 GN=Rtn4ip1 PE=1 SV=1	11	3	4	3	396	43.6	9.2	10.1	106.6	96.8	99.4	97.8	99.7	97.9	98.7	103.1
A0A0G2K1M2	Dlg1	Disks large homolog 1 OS=Rattus norvegicus OX=10116 GN=Dlg1 PE=1 SV=1	4	3	5	3	917	101.1	5.71	10.14	95.9	97.6	97.5	103.9	99.4	94.8	110.8	100.3
F1MAA2	Cops7a	COP9 signalosome subunit 7A OS=Rattus norvegicus OX=10116 GN=Cops7a PE=1 SV=1	8	2	4	2	277	30.4	7.4	10.2	107.2	107.5	102.4	95.8	93.6	99.9	97.6	96.1
B0BNE3	Trappc5	Trafficking protein particle complex subunit 5 OS=Rattus norvegicus OX=10116 GN=Trappc5 PE=1 SV=1	33	5	5	5	188	20.8	9.66	10.06	99.4	102.3	102	97.9	102.5	101.4	102.1	92.4
M0R907	Snrpd3	RCG60635, isoform CRA_b OS=Rattus norvegicus OX=10116 GN=Snrpd3 PE=1 SV=1	24	2	4	2	126	13.9	10.32	10.17	88	85.7	90.8	94.3	116.9	112.9	105.8	105.6
Q9Z142	Tmem33	Transmembrane protein 33 OS=Rattus norvegicus OX=10116 GN=Tmem33 PE=2 SV=1	12	3	6	3	247	28	9.66	10.41	98.2	97.1	97.4	102.9	103.4	99.2	99.5	102.3
P17078	Rpl35	60S ribosomal protein L35 OS=Rattus norvegicus OX=10116 GN=Rpl35 PE=1 SV=3	33	5	7	5	123	14.5	11.05	14.27	102.8	90.9	96.8	96.2	105.8	99.5	100.7	107.3
D3ZWS0	Scrib	Scribbled planar cell polarity protein OS=Rattus norvegicus OX=10116 GN=Scrib PE=1 SV=1	4	4	4	3	1663	179.7	5.17	9.28	110.5	91.1	96.2	96	102.7	103.8	100.8	98.9
M0R671	Tns2	Tensin 2 OS=Rattus norvegicus OX=10116 GN=Tns2 PE=1 SV=1	3	3	4	1	1400	151.8	8.38	5.81	98.8	96.9	107.9	98.8	108.2	88.2	97.6	103.6
A0A0G2K9V6	Tars	Threonine--tRNA ligase, cytoplasmic OS=Rattus norvegicus OX=10116 GN=Tars PE=1 SV=1	6	4	5	3	722	83.3	7.03	8.44	95.7	111.2	102.6	96.4	100.2	106.3	94.2	93.5
A0A1B0GWQ7	Tsn	Translin OS=Rattus norvegicus OX=10116 GN=Tsn PE=1 SV=1	15	4	5	4	282	31.9	9.2	10.56	92.6	92.5	142	84.7	96.9	99.5	98	93.9
Q5U3Z5	Bri3bp	BRI3-binding protein OS=Rattus norvegicus OX=10116 GN=Bri3bp PE=1 SV=1	17	3	4	3	253	28.3	8.92	10.08	103.2	104.1	102.4	94.4	93.9	100.4	101.5	100.2
B2RYN3	Eef1e1	Eukaryotic translation elongation factor 1 epsilon 1 OS=Rattus norvegicus OX=10116 GN=Eef1e1 PE=1 SV=1	25	4	5	4	174	19.8	8.16	8.88	104.1	96.7	102	93.4	105.9	96.5	99.9	101.5
M0RDI5	Mcu	Mitochondrial calcium uniporter OS=Rattus norvegicus OX=10116 GN=Mcu PE=1 SV=1	12	3	3	3	350	39.7	8.56	12.1	99.4	94.7	101.8	94.5	123.4	102.2	96.8	87.2
Q03344	Atp5if1	ATPase inhibitor, mitochondrial OS=Rattus norvegicus OX=10116 GN=Atp5if1 PE=3 SV=2	25	3	7	3	107	12.2	9.6	11.59	89.9	100.3	89.5	106.6	101.3	103.9	103.4	105
D4A6X7	Ppcs	Phosphopantothenoylcysteine synthetase OS=Rattus norvegicus OX=10116 GN=Ppcs PE=1 SV=1	13	4	5	4	311	33.9	6.81	12.81	100.6	104	106.2	97.7	97.2	96.6	97.6	100.1
Q9R0T4	Cdh1	Cadherin-1 OS=Rattus norvegicus OX=10116 GN=Cdh1 PE=1 SV=1	4	3	4	3	886	98.7	4.81	8.87	97.6	105.5	126.9	96	92.7	98.8	95.3	87.1
M0RDJ3	Eif2ak2	Interferon-induced, double-stranded RNA-activated protein kinase OS=Rattus norvegicus OX=10116 GN=Eif2ak2 PE=1 SV=2	11	4	5	4	513	58.2	7.44	8.15	97.5	93.8	95.4	89.8	109.6	100.6	107.9	105.4
O55159	Epcam	Epithelial cell adhesion molecule OS=Rattus norvegicus OX=10116 GN=Epcam PE=1 SV=1	13	4	5	4	315	35.2	6.42	12.09	86.4	96.4	92.3	91.3	126	104.1	103.6	99.9
D4ACA5	LOC100911130	Mitochondrial import inner membrane translocase subunit TIM17 OS=Rattus norvegicus OX=10116 GN=LOC100911130 PE=1 SV=1	35	3	4	3	172	18.4	9.03	10.88	87.7	101.8	120.2	92.9	99.8	98.3	99.9	99.3
P69735	Rab3gap1	Rab3 GTPase-activating protein catalytic subunit (Fragments) OS=Rattus norvegicus OX=10116 GN=Rab3gap1 PE=1 SV=2	10	5	5	5	775	86.5	5.8	7.92	97.4	93.2	98.9	95.3	102.1	101	105.8	106.2
Q6TUG0	Dnajb11	DnaJ homolog subfamily B member 11 OS=Rattus norvegicus OX=10116 GN=Dnajb11 PE=2 SV=1	9	3	5	3	358	40.5	6.32	14.42	98.7	101.4	98.9	92.4	99.7	105.5	105.5	98
F1M0R1	Rnf213	Ring finger protein 213 OS=Rattus norvegicus OX=10116 GN=Rnf213 PE=1 SV=3	2	5	6	5	5136	583	6.89	6.51	94	104.1	101.2	93.9	110.2	99.1	102.1	95.5
D4A899	Vps13a	Vacuolar protein sorting 13 homolog A OS=Rattus norvegicus OX=10116 GN=Vps13a PE=1 SV=2	2	5	5	5	2335	266.3	5.64	10.03	103.2	95.3	100.9	96	104.7	100.7	96.5	102.6
F1M820	Sorbs1	Sorbin and SH3 domain-containing protein 1 OS=Rattus norvegicus OX=10116 GN=Sorbs1 PE=1 SV=1	6	5	5	5	1290	143.3	8.22	8.52	97.7	101.3	98.8	92.7	105.9	102.5	101	100.2
P37397	Cnn3	Calponin-3 OS=Rattus norvegicus OX=10116 GN=Cnn3 PE=1 SV=1	9	3	5	3	330	36.4	5.72	5.89	95.9	97.4	101.6	100.9	100.6	100.6	103.2	99.8
Q5U318	Pea15	Astrocytic phosphoprotein PEA-15 OS=Rattus norvegicus OX=10116 GN=Pea15 PE=1 SV=1	23	2	3	2	130	15	5.02	7.05	93.8	90.5	92.2	94.8	104.6	105.5	106.6	112
A0A0G2K3Q6	Aldoc	Fructose-bisphosphate aldolase OS=Rattus norvegicus OX=10116 GN=Aldoc PE=1 SV=1	12	4	7	2	373	40.5	6.86	13.53	105.9	87	105.1	104.4	90.6	94.6	98.1	114.2
Q9WVA1	Timm8a	Mitochondrial import inner membrane translocase subunit Tim8 A OS=Rattus norvegicus OX=10116 GN=Timm8a PE=1 SV=1	61	4	6	4	97	11	5.16	10.12	99.5	92	103.6	99.9	101	98.5	104.5	101.1
Q4KM35	Psmb10	Proteasome subunit beta type-10 OS=Rattus norvegicus OX=10116 GN=Psmb10 PE=2 SV=1	20	4	6	4	273	29	6.64	11.79	110.2	93.9	94.3	90.8	106.8	97.1	100.3	106.5
P08082	Cltb	Clathrin light chain B OS=Rattus norvegicus OX=10116 GN=Cltb PE=1 SV=1	12	3	6	3	229	25.1	4.63	15.09	103.2	97.5	98.4	100.3	99.1	98.5	101.8	101.1
P35286	Rab13	Ras-related protein Rab-13 OS=Rattus norvegicus OX=10116 GN=Rab13 PE=1 SV=2	13	3	8	2	203	22.9	9.44	22.53	96.8	99.3	96.4	98.4	101.1	99.1	100.6	108.3
P25977	Ubtf	Nucleolar transcription factor 1 OS=Rattus norvegicus OX=10116 GN=Ubtf PE=1 SV=1	8	5	5	5	764	89.4	5.81	9.07	93.9	95.3	96.5	93.3	108.4	102.9	105.6	104.2
Q63584	Tmed10	Transmembrane emp24 domain-containing protein 10 OS=Rattus norvegicus OX=10116 GN=Tmed10 PE=1 SV=2	17	3	8	3	219	24.8	6.42	18.35	95.7	88.6	99.8	99.8	103.9	101	105.4	105.7
G3V7G0	Dync1li1	Cytoplasmic dynein 1 light intermediate chain 1 OS=Rattus norvegicus OX=10116 GN=Dync1li1 PE=1 SV=1	20	6	6	6	523	56.6	6.29	5.19	100.3	99.7	114.5	97.5	98.7	97.1	98	94
F7F707	Edc4	Enhancer of mRNA-decapping protein 4 OS=Rattus norvegicus OX=10116 GN=Edc4 PE=1 SV=2	3	3	3	3	1519	163.2	5.72	6.64	98	93.6	97.8	95.9	105.6	104.8	102.7	101.6
Q7TPJ3	Gusb	Beta-glucuronidase OS=Rattus norvegicus OX=10116 GN=Gusb PE=1 SV=1	8	5	5	5	808	92.5	6.83	8.7	87.4	88.2	94.8	86.5	110.5	112.7	113.8	106.2
A0A0G2K7X7	C7	Complement C7 OS=Rattus norvegicus OX=10116 GN=C7 PE=1 SV=1	5	4	5	4	846	93.6	7.25	9.43	111.4	87.9	117.4	90.9	97.2	98.6	97	99.7
A0A1W2Q655	Zbtb20	Zinc finger and BTB domain containing 20 (Predicted), isoform CRA_c OS=Rattus norvegicus OX=10116 GN=Zbtb20 PE=1 SV=1	5	3	4	3	741	81.1	6.49	9.36	88.6	115.7	102.1	87.9	108.9	103.8	99.7	93.3
Q6AY86	Vps26a	Vacuolar protein sorting-associated protein 26A OS=Rattus norvegicus OX=10116 GN=Vps26a PE=1 SV=1	14	3	5	3	327	38.1	6.57	9.14	94.6	92.3	98.1	100.8	102.3	104.4	104.7	102.9
G3V8V3	Pygm	Alpha-1,4 glucan phosphorylase OS=Rattus norvegicus OX=10116 GN=Pygm PE=1 SV=1	9	5	5	3	842	97.2	7.11	7.65	99.4	94.1	95.5	95.1	107.2	94.2	105.8	108.7
D4A3E8	Mrps27	Mitochondrial ribosomal protein S27 OS=Rattus norvegicus OX=10116 GN=Mrps27 PE=1 SV=1	13	5	5	5	415	47.6	5.33	13.19	102.8	102.8	103.9	98.6	106.5	96.7	93.4	95.3
Q6AYD9	Nudt19	Nucleoside diphosphate-linked moiety X motif 19 OS=Rattus norvegicus OX=10116 GN=Nudt19 PE=2 SV=1	16	4	4	4	357	39.9	6.89	10.17	105.5	103.3	104.3	96.2	99.4	95.5	99.2	96.6
F1M0X6	Magohb	Mago homolog B, exon junction complex subunit OS=Rattus norvegicus OX=10116 GN=Magohb PE=4 SV=2	31	3	4	3	148	17.3	6.39	9.55	102.7	106	99.4	100.8	101.7	97.6	96.9	94.9
Q5XI04	Stom	RCG45489, isoform CRA_a OS=Rattus norvegicus OX=10116 GN=Stom PE=1 SV=1	18	3	4	3	284	31.4	7.03	6.12	110.6	91.2	92.2	112.6	99	99.8	105.6	89
A0A0G2JU05	Llgl2	LLGL2, scribble cell polarity complex component OS=Rattus norvegicus OX=10116 GN=Llgl2 PE=1 SV=1	4	4	4	4	1077	119.6	8.19	9.4	94.5	95.5	99.8	95	110.4	100.9	104.5	99.5
B5DFN1	Eif1b	Eukaryotic translation initiation factor 1B OS=Rattus norvegicus OX=10116 GN=Eif1b PE=2 SV=1	26	2	4	1	113	12.8	7.37	5.65	86.3	81.8	90.4	104.1	106.1	93.9	128.8	108.7
G3V8T9	Bax	Apoptosis regulator BAX OS=Rattus norvegicus OX=10116 GN=Bax PE=1 SV=1	28	4	6	4	192	21.4	5.01	13.2	105.2	101.1	100.9	99.8	95.5	97.9	99.8	99.7
D4A9Z6	Mrps35	Mitochondrial ribosomal protein S35 OS=Rattus norvegicus OX=10116 GN=Mrps35 PE=1 SV=1	13	3	4	3	320	36.2	9.16	7.9	104.7	106.9	92.5	104.2	104.7	98.7	95.5	92.9
P97675	Enpp3	Ectonucleotide pyrophosphatase/phosphodiesterase family member 3 OS=Rattus norvegicus OX=10116 GN=Enpp3 PE=1 SV=2	5	4	4	4	875	99	6.42	9.05	111.8	102.3	104.5	108	92.9	94.8	91.9	93.8
A0A0G2JXS8	Ssr1	Translocon-associated protein subunit alpha OS=Rattus norvegicus OX=10116 GN=Ssr1 PE=1 SV=1	11	3	6	3	319	35.5	4.4	11.98	101.6	96.4	93.9	95.4	102.9	102.6	102.6	104.5
P70552	Gchfr	GTP cyclohydrolase 1 feedback regulatory protein OS=Rattus norvegicus OX=10116 GN=Gchfr PE=1 SV=3	51	2	4	2	84	9.7	6.52	6.69	98.8	99.2	102.2	108.5	99.3	93.3	95	103.9
B0BN18	Pfdn2	Prefoldin subunit 2 OS=Rattus norvegicus OX=10116 GN=Pfdn2 PE=2 SV=1	35	4	5	4	154	16.6	6.58	10.18	104.5	100.7	106.5	96.9	103	93.1	99.1	96.3
Q6AYB5	Srp54	Signal recognition particle 54 kDa protein OS=Rattus norvegicus OX=10116 GN=Srp54 PE=2 SV=1	9	4	5	4	504	55.7	8.75	7.87	99.8	102.2	95.8	101.8	104.5	102.2	97.7	95.9
B5DFN4	Pfdn5	Prefoldin 5 (Predicted), isoform CRA_a OS=Rattus norvegicus OX=10116 GN=Pfdn5 PE=1 SV=1	22	3	5	3	154	17.3	6.33	11.28	96.8	93.8	98.4	99.7	101.5	101.7	100.2	107.9
Q6AY21	G3bp2	G3BP stress granule assembly factor 2 OS=Rattus norvegicus OX=10116 GN=G3bp2 PE=1 SV=1	14	5	6	5	449	50.7	5.43	4.17	101.2	115.7	113.9	95.8	94.8	89.6	96.6	92.5
Q56R18	Kpna3	Importin subunit alpha OS=Rattus norvegicus OX=10116 GN=Kpna3 PE=1 SV=1	10	4	4	2	521	57.7	4.94	6.81	98.8	96.1	110.7	90	102.5	102.3	99.7	99.9
A0A0G2K3V4	Ogt	O-linked N-acetylglucosamine (GlcNAc) transferase (UDP-N-acetylglucosamine:polypeptide-N-acetylglucosaminyl transferase), isoform CRA_a OS=Rattus norvegicus OX=10116 GN=Ogt PE=1 SV=1	7	6	7	6	1046	116.9	6.7	7.29	108.5	104.9	113.8	89.7	104	99.4	91.8	87.9
Q62720	Slc30a1	Zinc transporter 1 OS=Rattus norvegicus OX=10116 GN=Slc30a1 PE=2 SV=1	6	2	3	2	507	55.1	6.44	7.87	100.5	103.7	100.8	97.6	102.6	97.8	96.2	100.7
B2GV74	Klc2	Kinesin light chain 2 OS=Rattus norvegicus OX=10116 GN=Klc2 PE=1 SV=1	7	4	4	3	622	68.6	7.03	9.07	101.8	95.6	109	97.2	102.3	96.2	96.2	101.7
A0A0G2K824	Gmppa	Mannose-1-phosphate guanyltransferase alpha OS=Rattus norvegicus OX=10116 GN=Gmppa PE=1 SV=1	13	4	5	4	425	46.6	7.39	8.84	99.3	100.8	102.7	100.5	99.2	99.4	101.4	96.7
Q63396	Sub1	Activated RNA polymerase II transcriptional coactivator p15 OS=Rattus norvegicus OX=10116 GN=Sub1 PE=1 SV=3	19	2	4	2	127	14.4	9.6	6.49	100.1	94.1	95.4	91.7	102.1	103.4	109.5	103.6
A0A0G2K2V6	Krt10	Keratin, type I cytoskeletal 10 OS=Rattus norvegicus OX=10116 GN=Krt10 PE=1 SV=1	8	6	7	4	559	56.8	5.11	9.86	107.1	110.9	113.9	104.6	95.2	90	90.1	88.2
A0A0G2KAZ7	Hnrnpdl	Heterogeneous nuclear ribonucleoprotein D-like OS=Rattus norvegicus OX=10116 GN=Hnrnpdl PE=1 SV=1	8	3	6	1	419	46.3	9.52	13.8	97.1	103.9	104.4	98.2	101.2	92.9	97.8	104.4
Q498U4	Sarnp	SAP domain-containing ribonucleoprotein OS=Rattus norvegicus OX=10116 GN=Sarnp PE=1 SV=3	27	5	7	5	210	23.6	6.65	6.74	94.5	96.9	99.4	95.8	102.2	105.3	102.8	103
P57093	Phyh	Phytanoyl-CoA dioxygenase, peroxisomal OS=Rattus norvegicus OX=10116 GN=Phyh PE=1 SV=2	9	3	5	3	338	38.6	8.48	12.67	102.4	93	90.9	101.5	101.9	97.4	105.2	107.6
F1LS72	Uba2	Ubiquitin-like modifier-activating enzyme 2 OS=Rattus norvegicus OX=10116 GN=Uba2 PE=1 SV=3	8	3	5	3	595	66.3	5.16	10.18	97.5	100.2	108.6	98.7	113.5	90.4	97.3	93.8
P23711	Hmox2	Heme oxygenase 2 OS=Rattus norvegicus OX=10116 GN=Hmox2 PE=1 SV=1	13	4	5	4	315	35.7	5.49	9.68	93	93.3	103.3	99.7	100	98.3	103.6	108.7
Q9WUL0	Top1	DNA topoisomerase 1 OS=Rattus norvegicus OX=10116 GN=Top1 PE=1 SV=1	6	5	6	5	767	90.7	9.32	14.48	99.6	100.2	101.5	99.8	99.3	100	99.1	100.6
Q9WTN5	Tpcn1	Two pore calcium channel protein 1 OS=Rattus norvegicus OX=10116 GN=Tpcn1 PE=1 SV=2	5	3	5	3	817	94.3	8.53	9.17	107.1	106.2	112.1	99.9	90.5	87.2	99.3	97.7
A0A0G2K318	Myo5b	Unconventional myosin-Vb OS=Rattus norvegicus OX=10116 GN=Myo5b PE=1 SV=1	5	7	7	6	1846	213.8	7.06	8.29	100.2	101.1	101.3	92.3	102.1	98.4	106	98.6
A0A0G2JWJ0	Ppp1r12a	Protein phosphatase 1 regulatory subunit 12A OS=Rattus norvegicus OX=10116 GN=Ppp1r12a PE=1 SV=1	3	3	5	2	1032	115.2	5.47	6.32	97	92	95.1	96.3	104.3	106.1	108.2	101.1
O08700	Vps45	Vacuolar protein sorting-associated protein 45 OS=Rattus norvegicus OX=10116 GN=Vps45 PE=1 SV=1	8	4	4	4	570	64.9	8.25	7.29	103.7	99.7	93.8	98.5	97.9	99.9	109.8	96.8
D3ZKX1	Washc3	RCG48807, isoform CRA_a OS=Rattus norvegicus OX=10116 GN=Washc3 PE=1 SV=1	26	3	5	3	194	21.1	4.49	8.25	101.7	103	99.9	90.9	102.2	99.6	98.1	104.5
B5DEZ6	Gnpda2	Glucosamine-6-phosphate isomerase OS=Rattus norvegicus OX=10116 GN=Gnpda2 PE=1 SV=1	16	3	4	1	276	31	6.74	5.33	97.4	102.4	110.1	110.1	95.4	101.3	96.7	86.5
D3ZZA8	Sec24a	SEC24 homolog A, COPII coat complex component OS=Rattus norvegicus OX=10116 GN=Sec24a PE=1 SV=1	4	2	4	2	1089	118.8	7.59	11.89	95.6	100.2	98.6	100.8	106.2	105.8	99.4	93.4
D4AED6	Mettl27	Methyltransferase-like 27 OS=Rattus norvegicus OX=10116 GN=Mettl27 PE=1 SV=1	22	4	4	4	253	27.4	5.2	8.81	92	92	93.6	102	102.5	107.9	101.3	108.7
A0A0G2K8H0	Caprin1	Caprin-1 OS=Rattus norvegicus OX=10116 GN=Caprin1 PE=1 SV=1	7	4	7	4	720	79.6	5.3	8.43	100.2	105.6	96.8	100.1	97.1	98.5	98.1	103.5
B0K008	Eif1	Eukaryotic translation initiation factor 1 OS=Rattus norvegicus OX=10116 GN=Eif1 PE=1 SV=1	26	2	4	1	113	12.7	7.44	4.75	104.2	105.2	106.8	92.8	98.1	103	92.9	97.1
P63036	Dnaja1	DnaJ homolog subfamily A member 1 OS=Rattus norvegicus OX=10116 GN=Dnaja1 PE=1 SV=1	12	5	6	4	397	44.8	7.08	11.57	105.1	103.7	103.4	96.9	96.9	96.6	99.9	97.6
A0A1W2Q627	Eif4e	Eukaryotic translation initiation factor 4E OS=Rattus norvegicus OX=10116 GN=Eif4e PE=1 SV=1	15	3	5	3	218	25.1	6.15	9.59	98.8	101	98.2	95.8	98.7	110.4	102.3	94.7
A0A096P6L9	C5	Complement C5 OS=Rattus norvegicus OX=10116 GN=C5 PE=1 SV=2	4	6	6	6	1681	189	6.62	4.43	102.1	95.4	96	107.1	97.8	99.5	107.3	94.8
G3V7H3	Cfd	Complement factor D OS=Rattus norvegicus OX=10116 GN=Cfd PE=1 SV=1	11	2	3	2	263	28.5	7.25	10.35	99.7	97	99.9	96.4	101.4	103.4	99.2	103
Q5HZY2	Sar1b	GTP-binding protein SAR1b OS=Rattus norvegicus OX=10116 GN=Sar1b PE=2 SV=1	19	3	5	2	198	22.4	6.11	12.73	98.2	95.6	105.3	104.5	102.4	102.1	94.8	97.2
F1M8X9	Gbf1	Golgi brefeldin A-resistant guanine nucleotide exchange factor 1 OS=Rattus norvegicus OX=10116 GN=Gbf1 PE=1 SV=2	3	4	5	4	1861	206.4	5.8	5.55	111.4	101.8	102.3	90.4	108.4	92.2	92.5	101.1
G3V6N2	Tmed4	Transmembrane emp24 protein transport domain containing 4 (Predicted), isoform CRA_b OS=Rattus norvegicus OX=10116 GN=Tmed4 PE=1 SV=3	16	4	6	4	227	26.1	8.57	4.22	99.9	102.9	99.1	102.9	97.3	99.9	102.8	95.1
D4ADG2	Iba57	IBA57, iron-sulfur cluster assembly OS=Rattus norvegicus OX=10116 GN=Iba57 PE=1 SV=1	20	3	3	3	358	38.6	9.13	10.51	114.3	82	94.4	110.4	103.7	100.3	96.1	98.9
B5DFD8	Sh3bgrl	SH3 domain-binding glutamic acid-rich-like protein OS=Rattus norvegicus OX=10116 GN=Sh3bgrl PE=1 SV=1	26	3	5	3	114	12.8	5.07	7.69	94.9	90.6	90.1	92.6	108.2	106.6	107.8	109.2
G3V928	Lrp1	LDL receptor-related protein 1 OS=Rattus norvegicus OX=10116 GN=Lrp1 PE=1 SV=1	2	6	6	6	4545	504.6	5.36	3.96	95.2	93.6	92.3	94.1	101.8	103.2	104.4	115.3
E9PTG1	Smarca2	SWI/SNF-related, matrix-associated, actin-dependent regulator of chromatin, subfamily a, member 2 OS=Rattus norvegicus OX=10116 GN=Smarca2 PE=1 SV=1	5	6	6	2	1597	182.2	7.08	6.44	89.7	90.8	109.3	95.1	107.3	107.4	105.7	94.7
A0A0G2K751	Dnajc8	DnaJ homolog subfamily C member 8 OS=Rattus norvegicus OX=10116 GN=Dnajc8 PE=1 SV=1	21	5	6	5	277	32.7	8.76	5.58	103.1	99	99.2	91.5	102.3	103.3	104.6	97
Q9JL55	Gde1	Glycerophosphodiester phosphodiesterase 1 OS=Rattus norvegicus OX=10116 GN=Gde1 PE=1 SV=2	11	3	4	3	331	37.6	6.74	6.85	107.5	112.2	116.3	95.8	94.8	90.4	91.5	91.5
Q5XIA5	Coasy	Coenzyme A synthase OS=Rattus norvegicus OX=10116 GN=Coasy PE=1 SV=1	7	4	5	4	563	62.1	7.3	12.77	101	105.9	91	104	96.7	101.6	96.6	103.3
G3V818	Parva	Alpha-parvin OS=Rattus norvegicus OX=10116 GN=Parva PE=1 SV=1	8	3	6	3	372	42.3	5.95	12.17	100.3	92.6	93.2	98.9	103.2	103.5	105.7	102.5
Q6AYF8	Serpinb9	RCG43931 OS=Rattus norvegicus OX=10116 GN=Serpinb9 PE=1 SV=1	10	3	5	3	374	42.3	5.86	13.67	94.7	87.6	95	91.1	111.5	100.3	110.4	109.3
D4AAE9	Cisd2	CDGSH iron sulfur domain 2 OS=Rattus norvegicus OX=10116 GN=Cisd2 PE=1 SV=1	28	3	4	3	135	15.3	9.64	5.66	94.6	104.3	97.2	95.6	103.1	103.2	101	100.9
G3V9T7	Asna1	ATPase Asna1 OS=Rattus norvegicus OX=10116 GN=Asna1 PE=1 SV=1	10	4	6	4	348	38.8	4.91	15.34	100.9	97.8	99.5	94.8	99.6	103.8	103.6	100
A0A0G2JW34	Cisd3	CDGSH iron sulfur domain 3 OS=Rattus norvegicus OX=10116 GN=Cisd3 PE=1 SV=1	35	5	5	5	127	14.4	9.88	10.82	94.9	118.9	111.2	94.4	90.7	97.2	96.4	96.5
M0R7U2	Tstd1	RCG20339, isoform CRA_b OS=Rattus norvegicus OX=10116 GN=Tstd1 PE=1 SV=1	26	3	4	3	133	14.4	8.48	10.42	102.8	102.4	99.8	104.7	99.9	95.8	97.7	96.9
D3Z9I1	Coa3	Cytochrome C oxidase assembly factor 3 OS=Rattus norvegicus OX=10116 GN=Coa3 PE=1 SV=1	27	3	10	3	108	11.9	9.6	12.79	103.3	101.5	98.8	102.4	102.3	98	101	92.7
G3V817	Xrcc5	X-ray repair cross-complementing protein 5 OS=Rattus norvegicus OX=10116 GN=Xrcc5 PE=1 SV=1	7	4	5	4	732	83	5.12	7.47	98.6	110.6	97.5	91.6	100.8	103.9	98.1	99
B0BN55	Urod	Uroporphyrinogen decarboxylase OS=Rattus norvegicus OX=10116 GN=Urod PE=1 SV=1	10	3	4	3	367	40.6	6.54	6.45	99.1	95.6	95.9	103.2	104	102.5	101.4	98.2
F1LRE2	Igfals	Insulin-like growth factor binding protein, acid labile subunit, isoform CRA_b OS=Rattus norvegicus OX=10116 GN=Igfals PE=1 SV=2	8	4	4	4	603	66.9	6.61	10.46	104.4	98.8	106	104	97.9	99.5	93.6	95.8
G3V6U3	Alg2	ALG2, alpha-1,3/1,6-mannosyltransferase OS=Rattus norvegicus OX=10116 GN=Alg2 PE=1 SV=1	10	3	4	3	415	47.3	7.97	9.13	99	101.3	104.7	99.4	99.6	98.8	95.4	101.8
B5DF91	Elavl1	ELAV-like protein 1 OS=Rattus norvegicus OX=10116 GN=Elavl1 PE=1 SV=1	13	4	4	4	326	36.1	9.04	7.45	95.2	91.1	87.8	91.6	108.1	112.9	107	106.2
D3ZPV8	Ggct	Gamma-glutamyl cyclotransferase OS=Rattus norvegicus OX=10116 GN=Ggct PE=1 SV=1	16	3	6	3	188	21.2	5.44	16.45	95.8	92.8	100.4	112.5	102.2	90.5	103.5	102.4
A0A0G2JUB4	Acat2	Acetyl-CoA acetyltransferase, cytosolic OS=Rattus norvegicus OX=10116 GN=Acat2 PE=1 SV=1	17	3	5	3	399	41.4	6.98	6.49	95.1	98.7	127.2	95.4	90.8	104.1	103	85.7
Q63486	Rraga	Ras-related GTP-binding protein A OS=Rattus norvegicus OX=10116 GN=Rraga PE=1 SV=1	16	4	5	4	313	36.5	7.72	8.75	97.7	97.3	105	94.6	106.2	97.9	101.9	99.4
F1LST0	Heatr5b	HEAT repeat-containing 5B OS=Rattus norvegicus OX=10116 GN=Heatr5b PE=1 SV=2	2	3	4	3	2030	219.5	7.39	7.15	92.1	95.3	117.2	106.8	115	104.2	89.8	79.6
B2RYD7	Stt3b	RCG25591, isoform CRA_a OS=Rattus norvegicus OX=10116 GN=Stt3b PE=1 SV=1	5	5	5	4	824	93.4	9.01	6.58	97.6	95.6	94.9	92.3	100.7	106.1	98.8	114.1
P21588	Nt5e	5'-nucleotidase OS=Rattus norvegicus OX=10116 GN=Nt5e PE=1 SV=1	7	3	6	3	576	63.9	6.98	13.52	100.9	99.3	107.4	94.4	96.8	99.2	98.8	103.2
F1M9W9	Trappc8	Similar to TRS85 homolog (Predicted) OS=Rattus norvegicus OX=10116 GN=Trappc8 PE=1 SV=2	4	5	6	5	1433	160.2	6.92	4.24	106.4	93.8	107.5	95.6	91.2	100.4	107.9	97.2
Q499U2	Elmo3	Engulfment and cell motility protein 3 OS=Rattus norvegicus OX=10116 GN=Elmo3 PE=2 SV=1	6	3	4	3	720	81.6	6.3	9.92	98.8	99.7	98.4	102.6	96.3	99.4	102.5	102.3
Q5XI97	Aarsd1	Alanyl-tRNA editing protein Aarsd1 OS=Rattus norvegicus OX=10116 GN=Aarsd1 PE=1 SV=1	12	4	4	4	412	45.1	6.48	10.76	115.2	101.2	107.1	103.6	100.5	90.4	91.5	90.4
B3DMA2	Acad11	Acyl-CoA dehydrogenase family member 11 OS=Rattus norvegicus OX=10116 GN=Acad11 PE=1 SV=1	6	5	5	5	779	87.3	8.18	9.72	96.3	102.5	100.1	103.9	97.2	95.8	98.8	105.4
A0A0H2UHJ1	S100a9	Protein S100-A9 OS=Rattus norvegicus OX=10116 GN=S100a9 PE=1 SV=1	22	4	8	4	133	15.2	8.05	17.16	123.7	121.8	131.7	121.6	78.4	78.9	73.9	70
Q80W92	Vac14	Protein VAC14 homolog OS=Rattus norvegicus OX=10116 GN=Vac14 PE=1 SV=1	8	5	5	5	783	88	6.13	10.03	105.3	98.7	97	93.2	103.5	101.9	100.7	99.7
Q3MIB4	Lonp2	Lon protease homolog 2, peroxisomal OS=Rattus norvegicus OX=10116 GN=Lonp2 PE=1 SV=2	4	3	5	3	852	94.3	7.23	10.32	106.7	96.1	103.5	99	99.6	108.5	96.5	90.1
Q00972	Bckdk	[3-methyl-2-oxobutanoate dehydrogenase [lipoamide]] kinase, mitochondrial OS=Rattus norvegicus OX=10116 GN=Bckdk PE=1 SV=2	12	3	4	3	412	46.4	8.76	9.02	105	99.5	93.1	103.2	102.3	99	104.8	93.1
P05182	Cyp2e1	Cytochrome P450 2E1 OS=Rattus norvegicus OX=10116 GN=Cyp2e1 PE=1 SV=4	12	5	7	5	493	56.6	8.4	4.85	110.7	99.3	102	101	100.1	98.3	95.2	93.5
A0A0G2JSX3	Naglt1	Na+ dependent glucose transporter 1, isoform CRA_b OS=Rattus norvegicus OX=10116 GN=Naglt1 PE=1 SV=1	9	4	4	4	484	51.7	8.63	9.68	110.7	112.6	109	106.1	92	91.5	90.4	87.7
Q01984	Hnmt	Histamine N-methyltransferase OS=Rattus norvegicus OX=10116 GN=Hnmt PE=1 SV=3	7	2	4	2	295	33.9	5.07	11.67	107.5	104.2	107.6	105.8	94	95.1	93.4	92.3
Q6AY23	Pycr2	Pyrroline-5-carboxylate reductase 2 OS=Rattus norvegicus OX=10116 GN=Pycr2 PE=2 SV=1	13	3	4	3	320	33.7	7.77	5.99	100.1	83.7	96.6	97.5	110.9	102.1	111.1	97.9
D3ZDK7	Pgp	Glycerol-3-phosphate phosphatase OS=Rattus norvegicus OX=10116 GN=Pgp PE=1 SV=1	13	3	3	3	321	34.6	5.35	10.48	104.8	94.2	102.9	105.1	96.7	98.5	102.4	95.4
P55770	Snu13	NHP2-like protein 1 OS=Rattus norvegicus OX=10116 GN=Snu13 PE=2 SV=4	28	3	6	3	128	14.2	8.46	5.94	86.6	89	87.8	91.2	112.1	108.9	111.8	112.6
D3ZHD1	Anxa13	Annexin OS=Rattus norvegicus OX=10116 GN=Anxa13 PE=1 SV=1	10	2	3	2	319	36.1	6.04	6.22	112.1	130.4	130.9	107.3	90.1	68.1	74.7	86.4
[truncated: 1,496 more rows]
