# Supplementary material for: iTRAQ-Based Comparative Proteomics Analysis of Urolithiasis Rats Induced by Ethylene Glycol
Source: Biomed Res Int. 2020 May 15;2020:6137947. doi: 10.1155/2020/6137947 (PMC7246402; doi:10.1155/2020/6137947)
Supplement: Supplementary 2 — Supplementary table 2. Differentially expressed proteins in the kidney of nephrolithiasis rats and the control rats. [file 6137947.f2.xlsx]

## Sheet: Sheet1
Accession	Gena Name	Description	Biological Process	Cell Component	Molecular Function	KEGG Pathways	Coverage [%]	# Peptides	# PSMs	# Unique Peptides	# AAs	MW [kDa]	calc. pI	Score Sequest HT: Sequest HT	S12	S16	S17	S26	C2	C3	C6	C8	P-value	FC
Q7TP08	Amacr	Alpha-methylacyl-CoA racemase OS=Rattus norvegicus OX=10116 GN=Amacr PE=1 SV=1	GO:0044238,primary metabolic process|GO:0044710,single-organism metabolic process|GO:0006629,lipid metabolic process|GO:0006082,organic acid metabolic process|GO:0044699,single-organism process|GO:1901360,organic cyclic compound metabolic process|GO:0009987,cellular process|GO:0019752,carboxylic acid metabolic process|GO:0032787,monocarboxylic acid metabolic process|GO:0071704,organic substance m…	GO:0005737,cytoplasm|GO:0043231,intracellular membrane-bounded organelle|GO:0044464,cell part|GO:0005777,peroxisome|GO:0044444,cytoplasmic part|GO:0005739,mitochondrion|GO:0005622,intracellular|GO:0042579,microbody|GO:0043229,intracellular organelle|GO:0005623,cell|GO:0044424,intracellular part|GO:0043227,membrane-bounded organelle|GO:0043226,organelle|GO:0016020,membrane|GO:0071944,cell peripher…	GO:0008111,alpha-methylacyl-CoA racemase activity|GO:0016854,racemase and epimerase activity|GO:0016853,isomerase activity|GO:0003824,catalytic activity|GO:0005488,binding|GO:0005515,protein binding|GO:0005102,receptor binding		34	11	27	1	454	49.9	6.6	63.09	66.3	57.8	63.4	64	141.6	127.5	142.6	136.7	1.3456e-06	0.458607
P11517		Hemoglobin subunit beta-2 OS=Rattus norvegicus OX=10116 PE=1 SV=2	GO:0006810,transport|GO:0015669,gas transport|GO:0044765,single-organism transport|GO:0015671,oxygen transport|GO:1902578,single-organism localization|GO:0051234,establishment of localization|GO:0051179,localization|GO:0044699,single-organism process	GO:0043234,protein complex|GO:0005737,cytoplasm|GO:0032991,macromolecular complex|GO:0005829,cytosol|GO:0044464,cell part|GO:0005623,cell|GO:0005833,hemoglobin complex|GO:0044444,cytoplasmic part|GO:0044445,cytosolic part|GO:0044424,intracellular part|GO:0005622,intracellular	GO:0043169,cation binding|GO:0005344,oxygen transporter activity|GO:0022892,substrate-specific transporter activity|GO:0046914,transition metal ion binding|GO:0020037,heme binding|GO:0046906,tetrapyrrole binding|GO:0005215,transporter activity|GO:0043167,ion binding|GO:0019825,oxygen binding|GO:0005488,binding|GO:0097159,organic cyclic compound binding|GO:0005506,iron ion binding|GO:0046872,metal…	rno05143,African trypanosomiasis|rno05144,Malaria	87	13	200	4	147	16	8.79	612.2	70.7	70.6	70.6	75.7	126.5	132	123.4	130.4	3.23396e-07	0.56139
Q62669	LOC103694855	Globin a1 OS=Rattus norvegicus OX=10116 GN=LOC103694855 PE=1 SV=1	GO:0006810,transport|GO:0015669,gas transport|GO:0044765,single-organism transport|GO:0015671,oxygen transport|GO:1902578,single-organism localization|GO:0051234,establishment of localization|GO:0051179,localization|GO:0044699,single-organism process	GO:0043234,protein complex|GO:0005737,cytoplasm|GO:0032991,macromolecular complex|GO:0005829,cytosol|GO:0044464,cell part|GO:0005623,cell|GO:0005833,hemoglobin complex|GO:0044444,cytoplasmic part|GO:0044445,cytosolic part|GO:0044424,intracellular part|GO:0005622,intracellular	GO:0043169,cation binding|GO:0005344,oxygen transporter activity|GO:0022892,substrate-specific transporter activity|GO:0046914,transition metal ion binding|GO:0020037,heme binding|GO:0046906,tetrapyrrole binding|GO:0005215,transporter activity|GO:0043167,ion binding|GO:0019825,oxygen binding|GO:0005488,binding|GO:0097159,organic cyclic compound binding|GO:0005506,iron ion binding|GO:0046872,metal…		46	7	138	4	147	16	8.19	408.43	72.9	71.5	72.8	72.2	128.3	126.4	125.1	130.7	9.37283e-09	0.566895
A0A0G2JSV6	Hba-a2	Globin c2 OS=Rattus norvegicus OX=10116 GN=Hba-a2 PE=1 SV=1	GO:1901700,response to oxygen-containing compound|GO:0032355,response to estradiol|GO:0033993,response to lipid|GO:0050896,response to stimulus|GO:0006810,transport|GO:0010033,response to organic substance|GO:0015669,gas transport|GO:0044765,single-organism transport|GO:0015671,oxygen transport|GO:0014070,response to organic cyclic compound|GO:1902578,single-organism localization|GO:0042221,respo…	GO:0043234,protein complex|GO:0005737,cytoplasm|GO:0032991,macromolecular complex|GO:0005829,cytosol|GO:0044464,cell part|GO:0005623,cell|GO:0005833,hemoglobin complex|GO:0044444,cytoplasmic part|GO:0044445,cytosolic part|GO:0044424,intracellular part|GO:0005622,intracellular	GO:0043169,cation binding|GO:0005344,oxygen transporter activity|GO:0022892,substrate-specific transporter activity|GO:0046914,transition metal ion binding|GO:0020037,heme binding|GO:0046906,tetrapyrrole binding|GO:0005215,transporter activity|GO:0043167,ion binding|GO:0019825,oxygen binding|GO:0005488,binding|GO:0097159,organic cyclic compound binding|GO:0005506,iron ion binding|GO:0046872,metal…		84	10	233	8	142	15.3	8.31	637.17	72	74.1	73	77.8	124.5	130.1	119.5	129	1.42146e-06	0.590141
Q5RKI7	Slc7a13	Solute carrier family 7 member 13 OS=Rattus norvegicus OX=10116 GN=Slc7a13 PE=2 SV=1	GO:0006865,amino acid transport|GO:0006820,anion transport|GO:0044699,single-organism process|GO:0051179,localization|GO:0071705,nitrogen compound transport|GO:0071702,organic substance transport|GO:1902475,L-alpha-amino acid transmembrane transport|GO:0006810,transport|GO:0015849,organic acid transport|GO:0006811,ion transport|GO:0009987,cellular process|GO:0015711,organic anion transport|GO:003…	GO:0031226,intrinsic component of plasma membrane|GO:0016021,integral component of membrane|GO:0016020,membrane|GO:0044464,cell part|GO:0005623,cell|GO:0071944,cell periphery|GO:0005887,integral component of plasma membrane|GO:0005886,plasma membrane|GO:0044425,membrane part|GO:0044459,plasma membrane part|GO:0031224,intrinsic component of membrane	GO:0022891,substrate-specific transmembrane transporter activity|GO:0015297,antiporter activity|GO:0022892,substrate-specific transporter activity|GO:0005342,organic acid transmembrane transporter activity|GO:0008514,organic anion transmembrane transporter activity|GO:0005215,transporter activity|GO:0008509,anion transmembrane transporter activity|GO:0015075,ion transmembrane transporter activity…		3	1	4	1	479	53.5	8.62	11.2	73.7	75.2	75.4	73.3	124	123.7	131.8	122.9	3.55591e-07	0.592357
A0A0H2UHJ1	S100a9	Protein S100-A9 OS=Rattus norvegicus OX=10116 GN=S100a9 PE=1 SV=1	GO:0090087,regulation of peptide transport|GO:2001235,positive regulation of apoptotic signaling pathway|GO:0007599,hemostasis|GO:0080090,regulation of primary metabolic process|GO:0019222,regulation of metabolic process|GO:2001233,regulation of apoptotic signaling pathway|GO:0051049,regulation of transport|GO:0048584,positive regulation of response to stimulus|GO:0048583,regulation of response t…	GO:0031974,membrane-enclosed lumen|GO:0031012,extracellular matrix|GO:0043229,intracellular organelle|GO:0043227,membrane-bounded organelle|GO:0043226,organelle|GO:0030054,cell junction|GO:0005737,cytoplasm|GO:0070062,extracellular exosome|GO:0031981,nuclear lumen|GO:0005615,extracellular space|GO:0005634,nucleus|GO:0005654,nucleoplasm|GO:1903561,extracellular vesicle|GO:0031982,vesicle|GO:004323…	GO:0050786,RAGE receptor binding|GO:0008270,zinc ion binding|GO:0036041,long-chain fatty acid binding|GO:0043168,anion binding|GO:0043169,cation binding|GO:0046914,transition metal ion binding|GO:0043167,ion binding|GO:0005509,calcium ion binding|GO:0005504,fatty acid binding|GO:0046872,metal ion binding|GO:0035662,Toll-like receptor 4 binding|GO:0015631,tubulin binding|GO:0008017,microtubule bin…		22	4	8	4	133	15.2	8.05	17.16	78.4	78.9	73.9	70	123.7	121.8	131.7	121.6	4.42617e-06	0.603849
A0A0G2JSW3	Hbb	Globin a4 OS=Rattus norvegicus OX=10116 GN=Hbb PE=1 SV=1	GO:0006810,transport|GO:0015669,gas transport|GO:0044765,single-organism transport|GO:0015671,oxygen transport|GO:1902578,single-organism localization|GO:0051234,establishment of localization|GO:0051179,localization|GO:0044699,single-organism process	GO:0043234,protein complex|GO:0005737,cytoplasm|GO:0032991,macromolecular complex|GO:0005829,cytosol|GO:0044464,cell part|GO:0005623,cell|GO:0005833,hemoglobin complex|GO:0044444,cytoplasmic part|GO:0044445,cytosolic part|GO:0044424,intracellular part|GO:0005622,intracellular	GO:0043169,cation binding|GO:0005344,oxygen transporter activity|GO:0022892,substrate-specific transporter activity|GO:0046914,transition metal ion binding|GO:0020037,heme binding|GO:0046906,tetrapyrrole binding|GO:0005215,transporter activity|GO:0043167,ion binding|GO:0019825,oxygen binding|GO:0005488,binding|GO:0097159,organic cyclic compound binding|GO:0005506,iron ion binding|GO:0046872,metal…		88	13	212	4	147	16	8.07	606.99	74.7	76.3	74	76.8	122.5	131.2	118.4	126.1	2.19143e-06	0.605781
D3ZCS9	RGD1309350	5-hydroxyisourate hydrolase OS=Rattus norvegicus OX=10116 GN=RGD1309350 PE=1 SV=1	GO:0071704,organic substance metabolic process|GO:0006139,nucleobase-containing compound metabolic process|GO:0044710,single-organism metabolic process|GO:1901564,organonitrogen compound metabolic process|GO:0044238,primary metabolic process|GO:0044699,single-organism process|GO:1901360,organic cyclic compound metabolic process|GO:0009987,cellular process|GO:0006725,cellular aromatic compound met…	GO:0005737,cytoplasm|GO:0043231,intracellular membrane-bounded organelle|GO:0044464,cell part|GO:0043229,intracellular organelle|GO:0005739,mitochondrion|GO:0005622,intracellular|GO:0044444,cytoplasmic part|GO:0005623,cell|GO:0044424,intracellular part|GO:0043227,membrane-bounded organelle|GO:0043226,organelle	GO:0033971,hydroxyisourate hydrolase activity|GO:0016787,hydrolase activity|GO:0016812,hydrolase activity, acting on carbon-nitrogen (but not peptide) bonds, in cyclic amides|GO:0016810,hydrolase activity, acting on carbon-nitrogen (but not peptide) bonds|GO:0003824,catalytic activity	rno00230,Purine metabolism|rno01100,Metabolic pathways	9	1	1	1	141	16	8.92	1.78	82.6	74.6	80.1	78.6	148.3	120.2	114.6	101	0.00588241	0.652551
D3ZHD1	Anxa13	Annexin OS=Rattus norvegicus OX=10116 GN=Anxa13 PE=1 SV=1		GO:0031974,membrane-enclosed lumen|GO:0043229,intracellular organelle|GO:0071944,cell periphery|GO:0043227,membrane-bounded organelle|GO:0043226,organelle|GO:0070062,extracellular exosome|GO:0031981,nuclear lumen|GO:0005615,extracellular space|GO:0005634,nucleus|GO:0016020,membrane|GO:0031988,membrane-bounded vesicle|GO:0005654,nucleoplasm|GO:0005886,plasma membrane|GO:1903561,extracellular vesic…	GO:0043168,anion binding|GO:0043169,cation binding|GO:0046872,metal ion binding|GO:0072341,modified amino acid binding|GO:0043177,organic acid binding|GO:0016597,amino acid binding|GO:0005543,phospholipid binding|GO:0005544,calcium-dependent phospholipid binding|GO:0008289,lipid binding|GO:0043167,ion binding|GO:0036094,small molecule binding|GO:0097367,carbohydrate derivative binding|GO:0031406,…		10	2	3	2	319	36.1	6.04	6.22	90.1	68.1	74.7	86.4	112.1	130.4	130.9	107.3	0.00231083	0.66424
B5DF57	Epb42	Erythrocyte membrane protein band 4.2 OS=Rattus norvegicus OX=10116 GN=Epb42 PE=1 SV=1	GO:0018149,peptide cross-linking|GO:0020027,hemoglobin metabolic process|GO:0050801,ion homeostasis|GO:0042592,homeostatic process|GO:0043170,macromolecule metabolic process|GO:0055072,iron ion homeostasis|GO:0055076,transition metal ion homeostasis|GO:0098771,inorganic ion homeostasis|GO:0009653,anatomical structure morphogenesis|GO:0007275,multicellular organism development|GO:0044699,single-or…	GO:0005856,cytoskeleton|GO:0005737,cytoplasm|GO:0043232,intracellular non-membrane-bounded organelle|GO:0030863,cortical cytoskeleton|GO:0044464,cell part|GO:0016020,membrane|GO:0071944,cell periphery|GO:0044444,cytoplasmic part|GO:0005623,cell|GO:0005622,intracellular|GO:0043229,intracellular organelle|GO:0043228,non-membrane-bounded organelle|GO:0005938,cell cortex|GO:0044424,intracellular part…	GO:0003810,protein-glutamine gamma-glutamyltransferase activity|GO:0003824,catalytic activity|GO:0016740,transferase activity|GO:0016746,transferase activity, transferring acyl groups|GO:0016755,transferase activity, transferring amino-acyl groups		3	2	2	2	689	76.5	7.23	4.28	90.5	78.6	76.7	74.1	108.1	130.4	141	100.6	0.00741885	0.66632
P06765	Pf4	Platelet factor 4 OS=Rattus norvegicus OX=10116 GN=Pf4 PE=1 SV=1	GO:0044238,primary metabolic process|GO:0019220,regulation of phosphate metabolic process|GO:0019221,cytokine-mediated signaling pathway|GO:0019222,regulation of metabolic process|GO:0048584,positive regulation of response to stimulus|GO:0048583,regulation of response to stimulus|GO:0043950,positive regulation of cAMP-mediated signaling|GO:0007610,behavior|GO:0045765,regulation of angiogenesis|GO…	GO:0043229,intracellular organelle|GO:0043227,membrane-bounded organelle|GO:0043226,organelle|GO:0005737,cytoplasm|GO:0031091,platelet alpha granule|GO:0031982,vesicle|GO:0016023,cytoplasmic, membrane-bounded vesicle|GO:0031410,cytoplasmic vesicle|GO:0031988,membrane-bounded vesicle|GO:0030141,secretory granule|GO:0012505,endomembrane system|GO:0005615,extracellular space|GO:0043234,protein compl…	GO:1901681,sulfur compound binding|GO:0043168,anion binding|GO:0042379,chemokine receptor binding|GO:0008009,chemokine activity|GO:0097367,carbohydrate derivative binding|GO:0005102,receptor binding|GO:0043167,ion binding|GO:0005539,glycosaminoglycan binding|GO:0005125,cytokine activity|GO:0048248,CXCR3 chemokine receptor binding|GO:0005488,binding|GO:0005515,protein binding|GO:0045236,CXCR chemo…	rno04062,Chemokine signaling pathway|rno04060,Cytokine-cytokine receptor interaction	15	1	1	1	105	11.3	9.5	2.43	91.8	66.3	86.2	79	113.4	119	143.7	100.6	0.0110394	0.678204
P22791	Hmgcs2	Hydroxymethylglutaryl-CoA synthase, mitochondrial OS=Rattus norvegicus OX=10116 GN=Hmgcs2 PE=1 SV=1	GO:0009628,response to abiotic stimulus|GO:0060322,head development|GO:0044281,small molecule metabolic process|GO:0044283,small molecule biosynthetic process|GO:1901362,organic cyclic compound biosynthetic process|GO:0044255,cellular lipid metabolic process|GO:1901360,organic cyclic compound metabolic process|GO:0043200,response to amino acid|GO:0044710,single-organism metabolic process|GO:00447…	GO:0005737,cytoplasm|GO:0043231,intracellular membrane-bounded organelle|GO:0043233,organelle lumen|GO:0044464,cell part|GO:0044444,cytoplasmic part|GO:0031974,membrane-enclosed lumen|GO:0005622,intracellular|GO:0044446,intracellular organelle part|GO:0070013,intracellular organelle lumen|GO:0043229,intracellular organelle|GO:0005739,mitochondrion|GO:0044429,mitochondrial part|GO:0005759,mitochon…	GO:0046912,transferase activity, transferring acyl groups, acyl groups converted into alkyl on transfer|GO:0004421,hydroxymethylglutaryl-CoA synthase activity|GO:0003824,catalytic activity|GO:0016740,transferase activity|GO:0016746,transferase activity, transferring acyl groups		13	6	10	6	508	56.9	8.68	21.31	78.8	80.5	81.3	82.8	120.2	118	117.9	120.5	3.45489e-08	0.678556
B0BNN3	Ca1	Carbonic anhydrase 1 OS=Rattus norvegicus OX=10116 GN=Ca1 PE=1 SV=1	GO:0044710,single-organism metabolic process|GO:0006730,one-carbon metabolic process|GO:0009987,cellular process|GO:0044237,cellular metabolic process|GO:0044763,single-organism cellular process|GO:0044281,small molecule metabolic process|GO:0008152,metabolic process|GO:0044699,single-organism process	GO:0005737,cytoplasm|GO:0005622,intracellular|GO:0043230,extracellular organelle|GO:0031982,vesicle|GO:0044421,extracellular region part|GO:0043227,membrane-bounded organelle|GO:0044464,cell part|GO:0005623,cell|GO:0031988,membrane-bounded vesicle|GO:0005576,extracellular region|GO:0044424,intracellular part|GO:1903561,extracellular vesicle|GO:0065010,extracellular membrane-bounded organelle|GO:0…	GO:0005488,binding|GO:0016787,hydrolase activity|GO:0046872,metal ion binding|GO:0046914,transition metal ion binding|GO:0043169,cation binding|GO:0016835,carbon-oxygen lyase activity|GO:0016836,hydro-lyase activity|GO:0052689,carboxylic ester hydrolase activity|GO:0043167,ion binding|GO:0003824,catalytic activity|GO:0016788,hydrolase activity, acting on ester bonds|GO:0004089,carbonate dehydrata…	rno00910,Nitrogen metabolism	26	5	14	5	261	28.3	7.42	35.46	83.3	80.2	80.7	80.3	122.9	117.1	117.6	117.9	3.00449e-07	0.68244
A0A0G2JSH5	Alb	Serum albumin OS=Rattus norvegicus OX=10116 GN=Alb PE=1 SV=1	GO:0009991,response to extracellular stimulus|GO:0051234,establishment of localization|GO:0060249,anatomical structure homeostasis|GO:0042592,homeostatic process|GO:0071496,cellular response to external stimulus|GO:0051659,maintenance of mitochondrion location|GO:0051818,disruption of cells of other organism involved in symbiotic interaction|GO:0042594,response to starvation|GO:0007154,cell commu…	GO:0005783,endoplasmic reticulum|GO:0043229,intracellular organelle|GO:0043227,membrane-bounded organelle|GO:0043226,organelle|GO:0005737,cytoplasm|GO:0070062,extracellular exosome|GO:0043209,myelin sheath|GO:0005615,extracellular space|GO:0005634,nucleus|GO:0072562,blood microparticle|GO:0005794,Golgi apparatus|GO:0012505,endomembrane system|GO:0032991,macromolecular complex|GO:1903561,extracell…	GO:0015643,toxic substance binding|GO:0070279,vitamin B6 binding|GO:0030170,pyridoxal phosphate binding|GO:0003676,nucleic acid binding|GO:0003677,DNA binding|GO:1901363,heterocyclic compound binding|GO:0043168,anion binding|GO:0051087,chaperone binding|GO:0043167,ion binding|GO:0005504,fatty acid binding|GO:0042802,identical protein binding|GO:0008289,lipid binding|GO:0036094,small molecule bind…		61	41	327	1	608	68.7	6.48	822.82	84.1	83.6	82.4	76.9	118	121.4	116.3	117.2	1.7265e-06	0.691478
Q6AZ33	Blvra	Biliverdin reductase A OS=Rattus norvegicus OX=10116 GN=Blvra PE=1 SV=1	GO:0006778,porphyrin-containing compound metabolic process|GO:0044248,cellular catabolic process|GO:0034641,cellular nitrogen compound metabolic process|GO:0006807,nitrogen compound metabolic process|GO:0044699,single-organism process|GO:1901361,organic cyclic compound catabolic process|GO:0044712,single-organism catabolic process|GO:0044710,single-organism metabolic process|GO:0051186,cofactor m…	GO:0005737,cytoplasm|GO:0005622,intracellular|GO:0043230,extracellular organelle|GO:0031982,vesicle|GO:0044421,extracellular region part|GO:0043227,membrane-bounded organelle|GO:0044464,cell part|GO:0005623,cell|GO:0031988,membrane-bounded vesicle|GO:0005576,extracellular region|GO:0044424,intracellular part|GO:1903561,extracellular vesicle|GO:0065010,extracellular membrane-bounded organelle|GO:0…	GO:0005488,binding|GO:0043169,cation binding|GO:0046872,metal ion binding|GO:0016628,oxidoreductase activity, acting on the CH-CH group of donors, NAD or NADP as acceptor|GO:0046914,transition metal ion binding|GO:0016627,oxidoreductase activity, acting on the CH-CH group of donors|GO:0043167,ion binding|GO:0003824,catalytic activity|GO:0008270,zinc ion binding|GO:0004074,biliverdin reductase act…	rno00860,Porphyrin and chlorophyll metabolism	52	12	22	1	295	33.5	6.34	46.72	83.9	78.7	82.9	83	118.8	115.4	120.5	116.6	5.83792e-07	0.697008
F8WFT7	Slc4a1	Anion exchange protein OS=Rattus norvegicus OX=10116 GN=Slc4a1 PE=1 SV=1	GO:0015701,bicarbonate transport|GO:0050801,ion homeostasis|GO:0042592,homeostatic process|GO:0098771,inorganic ion homeostasis|GO:0006820,anion transport|GO:0006821,chloride transport|GO:0051453,regulation of intracellular pH|GO:0030641,regulation of cellular pH|GO:0006885,regulation of pH|GO:0051179,localization|GO:0065007,biological regulation|GO:0044699,single-organism process|GO:0098661,inor…	GO:0098590,plasma membrane region|GO:0044421,extracellular region part|GO:0030016,myofibril|GO:0030017,sarcomere|GO:0043229,intracellular organelle|GO:0043228,non-membrane-bounded organelle|GO:0043227,membrane-bounded organelle|GO:0043226,organelle|GO:0030018,Z disc|GO:0005856,cytoskeleton|GO:0031982,vesicle|GO:0031226,intrinsic component of plasma membrane|GO:0016021,integral component of membra…	GO:0008022,protein C-terminus binding|GO:0019899,enzyme binding|GO:0005488,binding|GO:0030506,ankyrin binding|GO:0008509,anion transmembrane transporter activity|GO:0003779,actin binding|GO:0015106,bicarbonate transmembrane transporter activity|GO:0015103,inorganic anion transmembrane transporter activity|GO:0015108,chloride transmembrane transporter activity|GO:0022804,active transmembrane trans…	rno04966,Collecting duct acid secretion	15	11	17	11	928	103.2	5.41	40.65	81.6	82	81.3	85.5	117.6	118.2	118.4	115.5	1.01023e-07	0.703428
Q68FT5	Bhmt2	S-methylmethionine--homocysteine S-methyltransferase BHMT2 OS=Rattus norvegicus OX=10116 GN=Bhmt2 PE=2 SV=1	GO:0019752,carboxylic acid metabolic process|GO:0044249,cellular biosynthetic process|GO:0006807,nitrogen compound metabolic process|GO:0009067,aspartate family amino acid biosynthetic process|GO:0009066,aspartate family amino acid metabolic process|GO:0044283,small molecule biosynthetic process|GO:1901566,organonitrogen compound biosynthetic process|GO:0044699,single-organism process|GO:1901576,…	GO:0005737,cytoplasm|GO:0005829,cytosol|GO:0044464,cell part|GO:0005623,cell|GO:0005622,intracellular|GO:0044444,cytoplasmic part|GO:0044424,intracellular part	GO:0043169,cation binding|GO:0008898,S-adenosylmethionine-homocysteine S-methyltransferase activity|GO:0046914,transition metal ion binding|GO:0008757,S-adenosylmethionine-dependent methyltransferase activity|GO:0043167,ion binding|GO:0008172,S-methyltransferase activity|GO:0003824,catalytic activity|GO:0016740,transferase activity|GO:0016741,transferase activity, transferring one-carbon groups|G…	rno01100,Metabolic pathways|rno00270,Cysteine and methionine metabolism	19	6	9	2	363	39.9	6.61	18.83	88.6	77.9	90.2	75.3	108.9	114.9	117.7	126.4	0.000628752	0.709553
Q5M7A4	Uba5	Ubiquitin-like modifier-activating enzyme 5 OS=Rattus norvegicus OX=10116 GN=Uba5 PE=1 SV=1	GO:0048583,regulation of response to stimulus|GO:1990592,protein K69-linked ufmylation|GO:0023052,signaling|GO:0007165,signal transduction|GO:0023051,regulation of signaling|GO:0010646,regulation of cell communication|GO:0050789,regulation of biological process|GO:0044699,single-organism process|GO:0044267,cellular protein metabolic process|GO:0051716,cellular response to stimulus|GO:0030522,intr…	GO:0005737,cytoplasm|GO:0043231,intracellular membrane-bounded organelle|GO:0005829,cytosol|GO:0044464,cell part|GO:0044444,cytoplasmic part|GO:0005623,cell|GO:0043226,organelle|GO:0043229,intracellular organelle|GO:0044424,intracellular part|GO:0005622,intracellular|GO:0043227,membrane-bounded organelle|GO:0005634,nucleus|GO:0005794,Golgi apparatus|GO:0012505,endomembrane system	GO:0035639,purine ribonucleoside triphosphate binding|GO:0005488,binding|GO:0043167,ion binding|GO:1901363,heterocyclic compound binding|GO:1901265,nucleoside phosphate binding|GO:0001882,nucleoside binding|GO:0043168,anion binding|GO:0043169,cation binding|GO:0008641,small protein activating enzyme activity|GO:0000166,nucleotide binding|GO:0001883,purine nucleoside binding|GO:0032549,ribonucleos…		4	2	3	2	403	44.9	4.96	5.76	92.3	77.4	81.2	82.8	123.5	120.8	131.8	90.4	0.013423	0.715327
P15684	Anpep	Aminopeptidase N OS=Rattus norvegicus OX=10116 GN=Anpep PE=1 SV=2	GO:0048856,anatomical structure development|GO:0051234,establishment of localization|GO:0008152,metabolic process|GO:0051046,regulation of secretion|GO:0051048,negative regulation of secretion|GO:0051049,regulation of transport|GO:0050801,ion homeostasis|GO:0030154,cell differentiation|GO:0032845,negative regulation of homeostatic process|GO:0032844,regulation of homeostatic process|GO:0042592,ho…	GO:0031974,membrane-enclosed lumen|GO:0071944,cell periphery|GO:0043227,membrane-bounded organelle|GO:0043226,organelle|GO:0031224,intrinsic component of membrane|GO:0005737,cytoplasm|GO:0031983,vesicle lumen|GO:0031982,vesicle|GO:0016021,integral component of membrane|GO:0016020,membrane|GO:0031988,membrane-bounded vesicle|GO:0012506,vesicle membrane|GO:0005886,plasma membrane|GO:0031090,organel…	GO:0004177,aminopeptidase activity|GO:0042277,peptide binding|GO:0046914,transition metal ion binding|GO:0016787,hydrolase activity|GO:0033218,amide binding|GO:0003824,catalytic activity|GO:0043169,cation binding|GO:0043167,ion binding|GO:0008238,exopeptidase activity|GO:0070011,peptidase activity, acting on L-amino acid peptides|GO:0008270,zinc ion binding|GO:0070006,metalloaminopeptidase activi…	rno04614,Renin-angiotensin system|rno00480,Glutathione metabolism|rno01100,Metabolic pathways|rno04640,Hematopoietic cell lineage	31	24	59	4	965	109.4	5.47	110.18	85.7	83.8	82.4	81.8	115.4	117.1	117.7	116.2	5.0759e-08	0.71548
Q9WVR7	Ppm1f	Protein phosphatase 1F OS=Rattus norvegicus OX=10116 GN=Ppm1f PE=2 SV=1	GO:0043549,regulation of kinase activity|GO:0019220,regulation of phosphate metabolic process|GO:0080090,regulation of primary metabolic process|GO:0019222,regulation of metabolic process|GO:1901890,positive regulation of cell junction assembly|GO:0006470,protein dephosphorylation|GO:0048584,positive regulation of response to stimulus|GO:0048583,regulation of response to stimulus|GO:0007610,behav…	GO:0043234,protein complex|GO:0005737,cytoplasm|GO:0032991,macromolecular complex|GO:0005829,cytosol|GO:0044464,cell part|GO:0005623,cell|GO:0005622,intracellular|GO:0044444,cytoplasmic part|GO:0044424,intracellular part|GO:0048471,perinuclear region of cytoplasm	GO:0042578,phosphoric ester hydrolase activity|GO:0016791,phosphatase activity|GO:0016787,hydrolase activity|GO:0004723,calcium-dependent protein serine/threonine phosphatase activity|GO:0004722,protein serine/threonine phosphatase activity|GO:0004721,phosphoprotein phosphatase activity|GO:0043167,ion binding|GO:0033192,calmodulin-dependent protein phosphatase activity|GO:0003824,catalytic activi…		8	2	3	2	450	49.1	5.35	2.17	93.3	86.8	78.5	77	134.4	110.9	117.5	101.7	0.00642627	0.722497
Q6IFU7	Krt42	Keratin, type I cytoskeletal 42 OS=Rattus norvegicus OX=10116 GN=Krt42 PE=3 SV=1		GO:0005856,cytoskeleton|GO:0043234,protein complex|GO:0045111,intermediate filament cytoskeleton|GO:0043228,non-membrane-bounded organelle|GO:0043232,intracellular non-membrane-bounded organelle|GO:0044464,cell part|GO:0005623,cell|GO:0005737,cytoplasm|GO:0044446,intracellular organelle part|GO:0043229,intracellular organelle|GO:0005882,intermediate filament|GO:0044430,cytoskeletal part|GO:004442…	GO:0005198,structural molecule activity		6	3	4	1	452	50.2	5.16	10.29	90.6	79.9	82.1	84.8	111	122.4	118.1	111	0.000136495	0.729514
P84039	Enpp5	Ectonucleotide pyrophosphatase/phosphodiesterase family member 5 OS=Rattus norvegicus OX=10116 GN=Enpp5 PE=1 SV=2	GO:0009987,cellular process|GO:0044763,single-organism cellular process|GO:0008152,metabolic process|GO:0007154,cell communication|GO:0044699,single-organism process	GO:0016021,integral component of membrane|GO:0016020,membrane|GO:0044464,cell part|GO:0005623,cell|GO:0071944,cell periphery|GO:0005886,plasma membrane|GO:0044425,membrane part|GO:0031224,intrinsic component of membrane	GO:0016787,hydrolase activity|GO:0043169,cation binding|GO:0043167,ion binding|GO:0003824,catalytic activity|GO:0005488,binding|GO:0046872,metal ion binding		3	1	2	1	477	54.3	6.23	3.74	100.3	74	81	83.9	104.6	116	119	121.2	0.00389008	0.736111
Q68FT6	Rhbg	Ammonium transporter Rh type B OS=Rattus norvegicus OX=10116 GN=Rhbg PE=1 SV=1	GO:0098660,inorganic ion transmembrane transport|GO:0072488,ammonium transmembrane transport|GO:0044699,single-organism process|GO:0055085,transmembrane transport|GO:0071705,nitrogen compound transport|GO:0098662,inorganic cation transmembrane transport|GO:0015696,ammonium transport|GO:0015672,monovalent inorganic cation transport|GO:0006810,transport|GO:0006812,cation transport|GO:0006811,ion tr…	GO:0098590,plasma membrane region|GO:0005887,integral component of plasma membrane|GO:0046658,anchored component of plasma membrane|GO:0043229,intracellular organelle|GO:0043228,non-membrane-bounded organelle|GO:0043227,membrane-bounded organelle|GO:0043226,organelle|GO:0031224,intrinsic component of membrane|GO:0031225,anchored component of membrane|GO:0005856,cytoskeleton|GO:0031982,vesicle|GO:…	GO:0022891,substrate-specific transmembrane transporter activity|GO:0022890,inorganic cation transmembrane transporter activity|GO:0022892,substrate-specific transporter activity|GO:0008519,ammonium transmembrane transporter activity|GO:0008092,cytoskeletal protein binding|GO:0005215,transporter activity|GO:0008324,cation transmembrane transporter activity|GO:0022857,transmembrane transporter act…		2	1	1	1	455	49.7	6.62	2.35	84.8	93.7	80.2	82.8	115.5	113.7	113.2	116.1	6.84561e-05	0.74482
B0BNF9	Hao1	Hydroxyacid oxidase 1 OS=Rattus norvegicus OX=10116 GN=Hao1 PE=1 SV=1	GO:0034440,lipid oxidation|GO:0006631,fatty acid metabolic process|GO:0019752,carboxylic acid metabolic process|GO:0044248,cellular catabolic process|GO:0009062,fatty acid catabolic process|GO:0044281,small molecule metabolic process|GO:0044282,small molecule catabolic process|GO:0044242,cellular lipid catabolic process|GO:0044699,single-organism process|GO:0044712,single-organism catabolic proce…	GO:0005737,cytoplasm|GO:0043231,intracellular membrane-bounded organelle|GO:0044464,cell part|GO:0005777,peroxisome|GO:0044444,cytoplasmic part|GO:0005623,cell|GO:0005622,intracellular|GO:0042579,microbody|GO:0043229,intracellular organelle|GO:0044424,intracellular part|GO:0043227,membrane-bounded organelle|GO:0043226,organelle	GO:0003973,(S)-2-hydroxy-acid oxidase activity|GO:0005488,binding|GO:0000166,nucleotide binding|GO:1901363,heterocyclic compound binding|GO:1901265,nucleoside phosphate binding|GO:0016491,oxidoreductase activity|GO:0043168,anion binding|GO:0050662,coenzyme binding|GO:0008891,glycolate oxidase activity|GO:0043167,ion binding|GO:0010181,FMN binding|GO:0036094,small molecule binding|GO:0003824,catal…	rno01200,Carbon metabolism|rno04146,Peroxisome|rno01100,Metabolic pathways|rno00630,Glyoxylate and dicarboxylate metabolism	8	2	3	1	370	40.9	7.33	4.43	109	84.2	72.9	77.6	118.2	104.8	116.1	117.3	0.0170757	0.753067
F1M6Y6		Uncharacterized protein OS=Rattus norvegicus OX=10116 PE=3 SV=3	GO:0006810,transport|GO:0051179,localization|GO:0051234,establishment of localization	GO:0005576,extracellular region	GO:0005549,odorant binding|GO:0005215,transporter activity|GO:0005550,pheromone binding|GO:0036094,small molecule binding|GO:0005488,binding		30	9	40	2	178	20.4	6.11	98.34	88.3	82.1	90.7	83	115.2	111.3	114.6	114.7	1.70325e-05	0.754936
D3ZN76	Sec16a	Protein transport protein sec16 OS=Rattus norvegicus OX=10116 GN=Sec16a PE=1 SV=1	GO:0048208,COPII vesicle coating|GO:0022607,cellular component assembly|GO:0070271,protein complex biogenesis|GO:0043933,macromolecular complex subunit organization|GO:0006901,vesicle coating|GO:0006900,membrane budding|GO:0006903,vesicle targeting|GO:0048207,vesicle targeting, rough ER to cis-Golgi|GO:0061024,membrane organization|GO:0051656,establishment of organelle localization|GO:0051650,est…	GO:0005737,cytoplasm|GO:0005794,Golgi apparatus|GO:0043231,intracellular membrane-bounded organelle|GO:0044444,cytoplasmic part|GO:0098588,bounding membrane of organelle|GO:0016020,membrane|GO:0044464,cell part|GO:0043229,intracellular organelle|GO:0005623,cell|GO:0000139,Golgi membrane|GO:0044446,intracellular organelle part|GO:0044431,Golgi apparatus part|GO:0012505,endomembrane system|GO:00444…			0	1	1	1	2346	253.1	5.81	2.15	89.8	91.6	82.5	80.3	109.9	121.6	116.8	107.5	0.000587094	0.755156
Q4KLZ0	Vnn1	Vanin 1 OS=Rattus norvegicus OX=10116 GN=Vnn1 PE=1 SV=1	GO:2001234,negative regulation of apoptotic signaling pathway|GO:0033089,positive regulation of T cell differentiation in thymus|GO:0034112,positive regulation of homotypic cell-cell adhesion|GO:2001233,regulation of apoptotic signaling pathway|GO:0033081,regulation of T cell differentiation in thymus|GO:0048585,negative regulation of response to stimulus|GO:0048583,regulation of response to stim…	GO:0043230,extracellular organelle|GO:0031982,vesicle|GO:0044421,extracellular region part|GO:0043227,membrane-bounded organelle|GO:0031988,membrane-bounded vesicle|GO:0005576,extracellular region|GO:1903561,extracellular vesicle|GO:0065010,extracellular membrane-bounded organelle|GO:0043226,organelle|GO:0070062,extracellular exosome	GO:0016787,hydrolase activity|GO:0003824,catalytic activity|GO:0016810,hydrolase activity, acting on carbon-nitrogen (but not peptide) bonds|GO:0016811,hydrolase activity, acting on carbon-nitrogen (but not peptide) bonds, in linear amides|GO:0017159,pantetheine hydrolase activity	rno00770,Pantothenate and CoA biosynthesis	10	4	5	4	512	57	5.55	11.3	86.5	87.3	86.2	84.6	112.3	114	116.2	112.9	1.73339e-07	0.756697
Q63910	Hba-a3	Alpha globin OS=Rattus norvegicus OX=10116 GN=Hba-a3 PE=1 SV=2	GO:0006810,transport|GO:0015669,gas transport|GO:0044765,single-organism transport|GO:0015671,oxygen transport|GO:1902578,single-organism localization|GO:0051234,establishment of localization|GO:0051179,localization|GO:0044699,single-organism process|GO:0051259,protein oligomerization|GO:0022607,cellular component assembly|GO:0071822,protein complex subunit organization|GO:0070271,protein complex…	GO:0043234,protein complex|GO:0005737,cytoplasm|GO:0032991,macromolecular complex|GO:0005829,cytosol|GO:0044464,cell part|GO:0005623,cell|GO:0005833,hemoglobin complex|GO:0044444,cytoplasmic part|GO:0044445,cytosolic part|GO:0044424,intracellular part|GO:0005622,intracellular	GO:0043169,cation binding|GO:0005344,oxygen transporter activity|GO:0022892,substrate-specific transporter activity|GO:0046914,transition metal ion binding|GO:0020037,heme binding|GO:0046906,tetrapyrrole binding|GO:0005215,transporter activity|GO:0043167,ion binding|GO:0019825,oxygen binding|GO:0005488,binding|GO:0097159,organic cyclic compound binding|GO:0005506,iron ion binding|GO:0046872,metal…	rno05143,African trypanosomiasis|rno05144,Malaria	23	4	17	2	142	15.5	8.22	35.21	87.8	84.3	84.3	89.1	117.1	114.8	114.2	108.4	1.78232e-05	0.760176
P50115	S100a8	Protein S100-A8 OS=Rattus norvegicus OX=10116 GN=S100a8 PE=1 SV=3	GO:0090087,regulation of peptide transport|GO:2001235,positive regulation of apoptotic signaling pathway|GO:0051234,establishment of localization|GO:0080090,regulation of primary metabolic process|GO:0019222,regulation of metabolic process|GO:2001233,regulation of apoptotic signaling pathway|GO:0051049,regulation of transport|GO:0048584,positive regulation of response to stimulus|GO:0048583,regul…	GO:0043229,intracellular organelle|GO:0071944,cell periphery|GO:0043227,membrane-bounded organelle|GO:0043226,organelle|GO:0005856,cytoskeleton|GO:0031982,vesicle|GO:0005615,extracellular space|GO:0005634,nucleus|GO:0016020,membrane|GO:0031988,membrane-bounded vesicle|GO:0005576,extracellular region|GO:0005737,cytoplasm|GO:0005886,plasma membrane|GO:1903561,extracellular vesicle|GO:0070062,extrac…	GO:0050786,RAGE receptor binding|GO:0044877,macromolecular complex binding|GO:0008270,zinc ion binding|GO:0036041,long-chain fatty acid binding|GO:0043168,anion binding|GO:0043169,cation binding|GO:0046914,transition metal ion binding|GO:0043167,ion binding|GO:0005509,calcium ion binding|GO:0005504,fatty acid binding|GO:0046872,metal ion binding|GO:0035662,Toll-like receptor 4 binding|GO:0008017,…		30	3	8	3	89	10.2	6.05	17.18	89.2	86.1	85.7	85	111.9	116.8	116	109.3	1.00435e-05	0.762115
D4AEG2	Rab32	RAB32, member RAS oncogene family OS=Rattus norvegicus OX=10116 GN=Rab32 PE=1 SV=1	GO:0022607,cellular component assembly|GO:0051234,establishment of localization|GO:0048753,pigment granule organization|GO:0032438,melanosome organization|GO:0030154,cell differentiation|GO:0048757,pigment granule maturation|GO:0048066,developmental pigmentation|GO:0008104,protein localization|GO:0023052,signaling|GO:0007165,signal transduction|GO:0051641,cellular localization|GO:0035556,intracel…	GO:0048770,pigment granule|GO:0030139,endocytic vesicle|GO:0043229,intracellular organelle|GO:0043227,membrane-bounded organelle|GO:0043226,organelle|GO:0005737,cytoplasm|GO:0031984,organelle subcompartment|GO:0031982,vesicle|GO:0016023,cytoplasmic, membrane-bounded vesicle|GO:0031410,cytoplasmic vesicle|GO:0005739,mitochondrion|GO:0031988,membrane-bounded vesicle|GO:0044431,Golgi apparatus part|…	GO:0035639,purine ribonucleoside triphosphate binding|GO:0036461,BLOC-2 complex binding|GO:0044877,macromolecular complex binding|GO:0005488,binding|GO:0043167,ion binding|GO:1901363,heterocyclic compound binding|GO:0001883,purine nucleoside binding|GO:0001882,nucleoside binding|GO:0043168,anion binding|GO:0030742,GTP-dependent protein binding|GO:0016462,pyrophosphatase activity|GO:0000166,nucleo…		21	4	4	3	223	25.2	7.37	10.22	81.5	90.5	91.3	84.9	124.5	109.7	105.2	112.4	0.00156811	0.770695
A0A0G2K5C8	Stim1	Stromal interaction molecule 1 OS=Rattus norvegicus OX=10116 GN=Stim1 PE=1 SV=1	GO:0032414,positive regulation of ion transmembrane transporter activity|GO:0032411,positive regulation of transporter activity|GO:0032412,regulation of ion transmembrane transporter activity|GO:0051049,regulation of transport|GO:0070588,calcium ion transmembrane transport|GO:1903169,regulation of calcium ion transmembrane transport|GO:1901341,positive regulation of store-operated calcium channel…	GO:0005783,endoplasmic reticulum|GO:0005789,endoplasmic reticulum membrane|GO:0042175,nuclear outer membrane-endoplasmic reticulum membrane network|GO:0043229,intracellular organelle|GO:0030176,integral component of endoplasmic reticulum membrane|GO:0043227,membrane-bounded organelle|GO:0043226,organelle|GO:0031224,intrinsic component of membrane|GO:0005737,cytoplasm|GO:0031984,organelle subcompa…			2	1	1	1	716	80.9	6.62	2.77	95.5	79.9	94.7	78.2	119.2	129	108.8	94.8	0.02453	0.770916
Q64611	Csad	Cysteine sulfinic acid decarboxylase OS=Rattus norvegicus OX=10116 GN=Csad PE=1 SV=1	GO:0019752,carboxylic acid metabolic process|GO:0044249,cellular biosynthetic process|GO:0006807,nitrogen compound metabolic process|GO:0044281,small molecule metabolic process|GO:0044699,single-organism process|GO:1901576,organic substance biosynthetic process|GO:0044710,single-organism metabolic process|GO:0071704,organic substance metabolic process|GO:0009987,cellular process|GO:0009058,biosyn…	GO:0005737,cytoplasm|GO:0005829,cytosol|GO:0044464,cell part|GO:0005623,cell|GO:0005622,intracellular|GO:0044444,cytoplasmic part|GO:0044424,intracellular part	GO:0043168,anion binding|GO:0097159,organic cyclic compound binding|GO:0016829,lyase activity|GO:0016830,carbon-carbon lyase activity|GO:0016831,carboxy-lyase activity|GO:0043167,ion binding|GO:0003824,catalytic activity|GO:0048037,cofactor binding|GO:0030170,pyridoxal phosphate binding|GO:0005488,binding|GO:1901363,heterocyclic compound binding|GO:0004782,sulfinoalanine decarboxylase activity|GO…	rno00430,Taurine and hypotaurine metabolism|rno01100,Metabolic pathways	23	10	14	10	493	55.2	7.24	33.74	91.3	86.4	84.4	86.9	114.1	112.7	115.2	108.9	1.43827e-05	0.774008
D3ZS15		Uncharacterized protein OS=Rattus norvegicus OX=10116 PE=3 SV=2	GO:0080090,regulation of primary metabolic process|GO:0019222,regulation of metabolic process|GO:0009167,purine ribonucleoside monophosphate metabolic process|GO:0044281,small molecule metabolic process|GO:0009161,ribonucleoside monophosphate metabolic process|GO:1901360,organic cyclic compound metabolic process|GO:0044710,single-organism metabolic process|GO:0010604,positive regulation of macrom…	GO:0031970,organelle envelope lumen|GO:0031974,membrane-enclosed lumen|GO:0031975,envelope|GO:0043229,intracellular organelle|GO:0043227,membrane-bounded organelle|GO:0043226,organelle|GO:0005737,cytoplasm|GO:0016020,membrane|GO:0005740,mitochondrial envelope|GO:0005739,mitochondrion|GO:0005758,mitochondrial intermembrane space|GO:0031967,organelle envelope|GO:0043231,intracellular membrane-bound…	GO:0043169,cation binding|GO:0020037,heme binding|GO:0046906,tetrapyrrole binding|GO:0097159,organic cyclic compound binding|GO:0043167,ion binding|GO:0005488,binding|GO:0046872,metal ion binding|GO:1901363,heterocyclic compound binding|GO:0009055,electron carrier activity		15	2	3	1	106	11.8	9.66	4.1	88.7	92.1	90	78.9	101.9	127.8	124.2	96.4	0.0241158	0.776593
Q5QJC9	Bag5	BAG family molecular chaperone regulator 5 OS=Rattus norvegicus OX=10116 GN=Bag5 PE=1 SV=1	GO:0006457,protein folding|GO:0022607,cellular component assembly|GO:0009892,negative regulation of metabolic process|GO:0080090,regulation of primary metabolic process|GO:0019222,regulation of metabolic process|GO:0044092,negative regulation of molecular function|GO:0031324,negative regulation of cellular metabolic process|GO:0031323,regulation of cellular metabolic process|GO:0051128,regulation…	GO:0005737,cytoplasm|GO:0044464,cell part|GO:0016234,inclusion body|GO:0005622,intracellular|GO:0044444,cytoplasmic part|GO:0005623,cell|GO:0044424,intracellular part|GO:0048471,perinuclear region of cytoplasm	GO:0031625,ubiquitin protein ligase binding|GO:0044389,ubiquitin-like protein ligase binding|GO:0051087,chaperone binding|GO:0019899,enzyme binding|GO:0005488,binding|GO:0005515,protein binding		9	3	3	3	447	51	6.16	4.92	88.5	90.2	92.4	78.9	124.9	99.9	122.6	102.5	0.0132656	0.777951
Q64319	Slc3a1	Neutral and basic amino acid transport protein rBAT OS=Rattus norvegicus OX=10116 GN=Slc3a1 PE=1 SV=1	GO:0044238,primary metabolic process|GO:0006810,transport|GO:0005975,carbohydrate metabolic process|GO:0015849,organic acid transport|GO:0006811,ion transport|GO:0006865,amino acid transport|GO:0015711,organic anion transport|GO:0044765,single-organism transport|GO:0071704,organic substance metabolic process|GO:0006820,anion transport|GO:0071705,nitrogen compound transport|GO:0044699,single-organ…	GO:0098590,plasma membrane region|GO:0044421,extracellular region part|GO:0044464,cell part|GO:0031975,envelope|GO:0043229,intracellular organelle|GO:0005903,brush border|GO:0031988,membrane-bounded vesicle|GO:0043227,membrane-bounded organelle|GO:0043226,organelle|GO:0031224,intrinsic component of membrane|GO:0005737,cytoplasm|GO:0042995,cell projection|GO:0031090,organelle membrane|GO:0005773,v…	GO:0043169,cation binding|GO:0043167,ion binding|GO:0003824,catalytic activity|GO:0005488,binding|GO:0005515,protein binding|GO:0046983,protein dimerization activity|GO:0046982,protein heterodimerization activity	rno04974,Protein digestion and absorption	35	23	83	23	683	78.5	5.76	163.06	89.5	88.3	86.4	86	112.6	112.7	111.9	112.6	9.88626e-08	0.778568
P46720	Slco1a1	Solute carrier organic anion transporter family member 1A1 OS=Rattus norvegicus OX=10116 GN=Slco1a1 PE=1 SV=1	GO:0035634,response to stilbenoid|GO:0006820,anion transport|GO:0014070,response to organic cyclic compound|GO:0009719,response to endogenous stimulus|GO:0033993,response to lipid|GO:0051179,localization|GO:0044699,single-organism process|GO:0071702,organic substance transport|GO:0080184,response to phenylpropanoid|GO:0006811,ion transport|GO:0006810,transport|GO:0015711,organic anion transport|G…	GO:0098590,plasma membrane region|GO:0016020,membrane|GO:0031226,intrinsic component of plasma membrane|GO:0016021,integral component of membrane|GO:0098589,membrane region|GO:0044464,cell part|GO:0005623,cell|GO:0016323,basolateral plasma membrane|GO:0071944,cell periphery|GO:0005887,integral component of plasma membrane|GO:0005886,plasma membrane|GO:0044425,membrane part|GO:0044459,plasma membr…	GO:0022891,substrate-specific transmembrane transporter activity|GO:0022892,substrate-specific transporter activity|GO:0008514,organic anion transmembrane transporter activity|GO:0005215,transporter activity|GO:0008509,anion transmembrane transporter activity|GO:0015075,ion transmembrane transporter activity|GO:0022857,transmembrane transporter activity|GO:0015291,secondary active transmembrane t…		8	5	6	5	670	74.1	7.87	9.45	86.1	92.4	82.3	90	116.9	111.3	110.5	110.4	0.000100809	0.781118
F1LPM3	Sorbs2	Sorbin and SH3 domain-containing protein 2 OS=Rattus norvegicus OX=10116 GN=Sorbs2 PE=1 SV=2	GO:0043933,macromolecular complex subunit organization|GO:0030036,actin cytoskeleton organization|GO:0006928,movement of cell or subcellular component|GO:0051674,localization of cell|GO:0071840,cellular component organization or biogenesis|GO:0071822,protein complex subunit organization|GO:0016043,cellular component organization|GO:0044699,single-organism process|GO:0022610,biological adhesion|GO…	GO:0016020,membrane|GO:0044464,cell part|GO:0005623,cell|GO:0071944,cell periphery|GO:0005886,plasma membrane|GO:0044446,intracellular organelle part|GO:0043231,intracellular membrane-bounded organelle|GO:0031981,nuclear lumen|GO:0043233,organelle lumen|GO:0005634,nucleus|GO:0031974,membrane-enclosed lumen|GO:0005622,intracellular|GO:0005654,nucleoplasm|GO:0070013,intracellular organelle lumen|GO…	GO:0005488,binding|GO:0043169,cation binding|GO:0005515,protein binding|GO:0097159,organic cyclic compound binding|GO:0044822,poly(A) RNA binding|GO:0043167,ion binding|GO:0003723,RNA binding|GO:0003676,nucleic acid binding|GO:0046872,metal ion binding|GO:1901363,heterocyclic compound binding|GO:0019904,protein domain specific binding		3	2	2	2	1196	134.1	8.41	5.08	92.3	86.3	87	86	100.2	123.3	126.4	98.5	0.0184113	0.784121
A0A140UHX6	Sptb	Spectrin beta chain OS=Rattus norvegicus OX=10116 GN=Sptb PE=1 SV=1	GO:0022607,cellular component assembly|GO:0033043,regulation of organelle organization|GO:0043933,macromolecular complex subunit organization|GO:1901879,regulation of protein depolymerization|GO:0051129,negative regulation of cellular component organization|GO:0051128,regulation of cellular component organization|GO:0008064,regulation of actin polymerization or depolymerization|GO:0034622,cellula…	GO:0015629,actin cytoskeleton|GO:0043229,intracellular organelle|GO:0043228,non-membrane-bounded organelle|GO:0005622,intracellular|GO:0043227,membrane-bounded organelle|GO:0043226,organelle|GO:0005856,cytoskeleton|GO:0005737,cytoplasm|GO:0044430,cytoskeletal part|GO:0005794,Golgi apparatus|GO:0099568,cytoplasmic region|GO:0014731,spectrin-associated cytoskeleton|GO:0005938,cell cortex|GO:0032991…	GO:0043168,anion binding|GO:0005200,structural constituent of cytoskeleton|GO:0008092,cytoskeletal protein binding|GO:0005543,phospholipid binding|GO:0008289,lipid binding|GO:0051015,actin filament binding|GO:0005198,structural molecule activity|GO:0003779,actin binding|GO:0044877,macromolecular complex binding|GO:0005488,binding|GO:0005515,protein binding|GO:0032403,protein complex binding|GO:00…		5	13	22	6	2329	267.9	5.45	37.8	90.6	88.5	88.3	84.5	113.6	108.2	113.3	113	1.10048e-05	0.785316
B2GUZ1	Usp4	Ubiquitin carboxyl-terminal hydrolase 4 OS=Rattus norvegicus OX=10116 GN=Usp4 PE=1 SV=1	GO:0008104,protein localization|GO:0000244,spliceosomal tri-snRNP complex assembly|GO:0080090,regulation of primary metabolic process|GO:0019222,regulation of metabolic process|GO:0071840,cellular component organization or biogenesis|GO:0010605,negative regulation of macromolecule metabolic process|GO:0070727,cellular macromolecule localization|GO:0070647,protein modification by small protein con…	GO:0005737,cytoplasm|GO:0043231,intracellular membrane-bounded organelle|GO:0005634,nucleus|GO:0016020,membrane|GO:0044464,cell part|GO:0005623,cell|GO:0005622,intracellular|GO:0043229,intracellular organelle|GO:0071944,cell periphery|GO:0005886,plasma membrane|GO:0044424,intracellular part|GO:0043227,membrane-bounded organelle|GO:0043226,organelle|GO:0005829,cytosol|GO:0044444,cytoplasmic part	GO:0016787,hydrolase activity|GO:0043167,ion binding|GO:0004175,endopeptidase activity|GO:0019783,ubiquitin-like protein-specific protease activity|GO:0031685,adenosine receptor binding|GO:0043169,cation binding|GO:0004197,cysteine-type endopeptidase activity|GO:0005102,receptor binding|GO:0008234,cysteine-type peptidase activity|GO:0003824,catalytic activity|GO:0036459,thiol-dependent ubiquitiny…		3	2	3	2	961	108.3	5.64	4.64	87	90.4	86.6	90.5	101.6	114.6	122.8	106.6	0.00307016	0.795557
Q63010		Liver carboxylesterase B-1 OS=Rattus norvegicus OX=10116 PE=1 SV=1	GO:0008152,metabolic process	GO:0005737,cytoplasm|GO:0012505,endomembrane system|GO:0005783,endoplasmic reticulum|GO:0044432,endoplasmic reticulum part|GO:0043233,organelle lumen|GO:0044464,cell part|GO:0044444,cytoplasmic part|GO:0031974,membrane-enclosed lumen|GO:0005622,intracellular|GO:0044446,intracellular organelle part|GO:0070013,intracellular organelle lumen|GO:0043229,intracellular organelle|GO:0005788,endoplasmic r…	GO:0016787,hydrolase activity|GO:0016788,hydrolase activity, acting on ester bonds|GO:0052689,carboxylic ester hydrolase activity|GO:0003824,catalytic activity		37	18	59	8	561	62.5	6.71	123.08	88.9	88.9	90.2	87.2	112.1	111.6	108.4	112.7	1.12734e-06	0.798561
D3ZBW3	Tmem201	Transmembrane protein 201 OS=Rattus norvegicus OX=10116 GN=Tmem201 PE=1 SV=2	GO:0040011,locomotion|GO:0051647,nucleus localization|GO:0016477,cell migration|GO:0051234,establishment of localization|GO:0048870,cell motility|GO:0009987,cellular process|GO:0006928,movement of cell or subcellular component|GO:0051656,establishment of organelle localization|GO:0051674,localization of cell|GO:0044763,single-organism cellular process|GO:0051640,organelle localization|GO:0051641,…	GO:0016020,membrane|GO:0043231,intracellular membrane-bounded organelle|GO:0044464,cell part|GO:0005634,nucleus|GO:0005635,nuclear envelope|GO:0031965,nuclear membrane|GO:0031967,organelle envelope|GO:0031975,envelope|GO:0044446,intracellular organelle part|GO:0043229,intracellular organelle|GO:0044428,nuclear part|GO:0012505,endomembrane system|GO:0044424,intracellular part|GO:0005623,cell|GO:00…	GO:0008092,cytoskeletal protein binding|GO:0051015,actin filament binding|GO:0003779,actin binding|GO:0044877,macromolecular complex binding|GO:0005488,binding|GO:0005515,protein binding|GO:0032403,protein complex binding|GO:0005521,lamin binding		1	1	1	1	620	67.9	9.13	2.33	78.3	100.5	81.8	94.7	99.4	122.4	112.1	110.8	0.0193243	0.798966
P07896	Ehhadh	Peroxisomal bifunctional enzyme OS=Rattus norvegicus OX=10116 GN=Ehhadh PE=1 SV=2	GO:0034440,lipid oxidation|GO:0006631,fatty acid metabolic process|GO:0006635,fatty acid beta-oxidation|GO:0006473,protein acetylation|GO:0006475,internal protein amino acid acetylation|GO:0019752,carboxylic acid metabolic process|GO:0044248,cellular catabolic process|GO:0009062,fatty acid catabolic process|GO:0044281,small molecule metabolic process|GO:0044282,small molecule catabolic process|GO…	GO:0005737,cytoplasm|GO:0043231,intracellular membrane-bounded organelle|GO:0044464,cell part|GO:0005829,cytosol|GO:0005777,peroxisome|GO:0044444,cytoplasmic part|GO:0005739,mitochondrion|GO:0005622,intracellular|GO:0042579,microbody|GO:0043229,intracellular organelle|GO:0005623,cell|GO:0044424,intracellular part|GO:0043227,membrane-bounded organelle|GO:0043226,organelle	GO:0004165,dodecenoyl-CoA delta-isomerase activity|GO:0016614,oxidoreductase activity, acting on CH-OH group of donors|GO:0016853,isomerase activity|GO:0016616,oxidoreductase activity, acting on the CH-OH group of donors, NAD or NADP as acceptor|GO:0003824,catalytic activity|GO:0016860,intramolecular oxidoreductase activity|GO:0016835,carbon-oxygen lyase activity|GO:0016836,hydro-lyase activity|G…	rno01200,Carbon metabolism|rno01212,Fatty acid metabolism|rno04146,Peroxisome|rno01100,Metabolic pathways|rno00650,Butanoate metabolism|rno00410,beta-Alanine metabolism|rno00640,Propanoate metabolism|rno00071,Fatty acid degradation|rno00280,Valine, leucine and isoleucine degradation|rno03320,PPAR signaling pathway|rno00380,Tryptophan metabolism|rno00310,Lysine degradation	44	28	70	28	722	78.6	9.2	156.06	89.6	89.9	87.8	88.2	119.7	108.1	107	109.6	0.00028929	0.799955
A0A0G2K654	Hist1h1c	Histone cluster 1 H1 family member c OS=Rattus norvegicus OX=10116 GN=Hist1h1c PE=1 SV=1	GO:0006479,protein methylation|GO:0080090,regulation of primary metabolic process|GO:0019222,regulation of metabolic process|GO:0051568,histone H3-K4 methylation|GO:1901362,organic cyclic compound biosynthetic process|GO:0071840,cellular component organization or biogenesis|GO:0010605,negative regulation of macromolecule metabolic process|GO:0018193,peptidyl-amino acid modification|GO:0016571,his…	GO:0031974,membrane-enclosed lumen|GO:0044815,DNA packaging complex|GO:0043229,intracellular organelle|GO:0043228,non-membrane-bounded organelle|GO:0000785,chromatin|GO:0000786,nucleosome|GO:0000228,nuclear chromosome|GO:0043227,membrane-bounded organelle|GO:0043226,organelle|GO:0005719,nuclear euchromatin|GO:0031981,nuclear lumen|GO:0005634,nucleus|GO:0044454,nuclear chromosome part|GO:0005694,c…	GO:0097159,organic cyclic compound binding|GO:0031490,chromatin DNA binding|GO:0003723,RNA binding|GO:0003676,nucleic acid binding|GO:0003677,DNA binding|GO:0003682,chromatin binding|GO:1901363,heterocyclic compound binding|GO:0005488,binding		42	13	53	3	212	21.3	11	119.3	107	109.2	110	110.3	91.3	92.5	87.5	92.2	1.12309e-05	1.20083
Q5U362	Anxa4	Annexin OS=Rattus norvegicus OX=10116 GN=Anxa4 PE=1 SV=1	GO:0006887,exocytosis|GO:0080090,regulation of primary metabolic process|GO:0019222,regulation of metabolic process|GO:0051048,negative regulation of secretion|GO:0051049,regulation of transport|GO:0008104,protein localization|GO:1901362,organic cyclic compound biosynthetic process|GO:1901360,organic cyclic compound metabolic process|GO:0010605,negative regulation of macromolecule metabolic proce…	GO:0005635,nuclear envelope|GO:0031975,envelope|GO:0043229,intracellular organelle|GO:0071944,cell periphery|GO:0043227,membrane-bounded organelle|GO:0043226,organelle|GO:0005737,cytoplasm|GO:0070062,extracellular exosome|GO:0005634,nucleus|GO:0016020,membrane|GO:0031988,membrane-bounded vesicle|GO:0048471,perinuclear region of cytoplasm|GO:0009986,cell surface|GO:0031965,nuclear membrane|GO:0031…	GO:0043168,anion binding|GO:0043169,cation binding|GO:0048306,calcium-dependent protein binding|GO:0008134,transcription factor binding|GO:0005543,phospholipid binding|GO:0005544,calcium-dependent phospholipid binding|GO:0008289,lipid binding|GO:0051059,NF-kappaB binding|GO:0043167,ion binding|GO:0005509,calcium ion binding|GO:0005515,protein binding|GO:0046872,metal ion binding|GO:0042802,identi…		42	12	21	12	319	35.9	5.57	63.09	108.8	108.4	110.5	108.8	90.8	87.6	91.9	93.2	7.61615e-06	1.20083
A0A0G2K714	Sh3glb1	Endophilin-B1 OS=Rattus norvegicus OX=10116 GN=Sh3glb1 PE=1 SV=1	GO:2001235,positive regulation of apoptotic signaling pathway|GO:0008104,protein localization|GO:0019220,regulation of phosphate metabolic process|GO:0080090,regulation of primary metabolic process|GO:0019222,regulation of metabolic process|GO:2001233,regulation of apoptotic signaling pathway|GO:0051049,regulation of transport|GO:0032386,regulation of intracellular transport|GO:0048584,positive r…	GO:0043234,protein complex|GO:0005737,cytoplasm|GO:0032991,macromolecular complex|GO:0043231,intracellular membrane-bounded organelle|GO:0005829,cytosol|GO:0016020,membrane|GO:0044464,cell part|GO:0044444,cytoplasmic part|GO:0005739,mitochondrion|GO:0005622,intracellular|GO:0043229,intracellular organelle|GO:0005623,cell|GO:0044424,intracellular part|GO:0043227,membrane-bounded organelle|GO:00432…	GO:0043168,anion binding|GO:0005488,binding|GO:0043177,organic acid binding|GO:0031406,carboxylic acid binding|GO:0008289,lipid binding|GO:0043167,ion binding|GO:0036094,small molecule binding|GO:0003824,catalytic activity|GO:0016740,transferase activity|GO:0016746,transferase activity, transferring acyl groups|GO:0042171,lysophosphatidic acid acyltransferase activity|GO:0005504,fatty acid bindin…		4	1	2	1	384	43.1	6.71	9.42	110.3	103.7	113.2	109.3	96.5	88.6	88	90.4	0.000598866	1.20083
A0A0G2JZI0	Safb	Scaffold attachment factor B OS=Rattus norvegicus OX=10116 GN=Safb PE=1 SV=1	GO:0080090,regulation of primary metabolic process|GO:0019222,regulation of metabolic process|GO:0050684,regulation of mRNA processing|GO:2001141,regulation of RNA biosynthetic process|GO:0007165,signal transduction|GO:1901362,organic cyclic compound biosynthetic process|GO:1901360,organic cyclic compound metabolic process|GO:0009755,hormone-mediated signaling pathway|GO:0042445,hormone metabolic…	GO:0044446,intracellular organelle part|GO:0043231,intracellular membrane-bounded organelle|GO:0031981,nuclear lumen|GO:0043233,organelle lumen|GO:0005634,nucleus|GO:0044464,cell part|GO:0031974,membrane-enclosed lumen|GO:0005622,intracellular|GO:0005654,nucleoplasm|GO:0070013,intracellular organelle lumen|GO:0043229,intracellular organelle|GO:0044428,nuclear part|GO:0005623,cell|GO:0044424,intra…	GO:0044212,transcription regulatory region DNA binding|GO:0003676,nucleic acid binding|GO:0097159,organic cyclic compound binding|GO:0000975,regulatory region DNA binding|GO:0001067,regulatory region nucleic acid binding|GO:0003723,RNA binding|GO:0001047,core promoter binding|GO:0003677,DNA binding|GO:0003682,chromatin binding|GO:1901363,heterocyclic compound binding|GO:0005488,binding|GO:0043565…		2	3	4	1	940	105.5	5.36	7.03	110.8	108.3	112.2	105.2	88.1	90.5	90.5	94.3	9.69671e-05	1.20116
B5DEQ4	Snrpb2	RCG27500, isoform CRA_c OS=Rattus norvegicus OX=10116 GN=Snrpb2 PE=1 SV=1	GO:0090304,nucleic acid metabolic process|GO:0034641,cellular nitrogen compound metabolic process|GO:0006807,nitrogen compound metabolic process|GO:0044237,cellular metabolic process|GO:1901360,organic cyclic compound metabolic process|GO:0006139,nucleobase-containing compound metabolic process|GO:0044260,cellular macromolecule metabolic process|GO:0071704,organic substance metabolic process|GO:0…	GO:0031974,membrane-enclosed lumen|GO:0043229,intracellular organelle|GO:0043228,non-membrane-bounded organelle|GO:0043227,membrane-bounded organelle|GO:0043226,organelle|GO:0031981,nuclear lumen|GO:0005730,nucleolus|GO:0005634,nucleus|GO:0030529,intracellular ribonucleoprotein complex|GO:0005654,nucleoplasm|GO:0019013,viral nucleocapsid|GO:0019012,virion|GO:0071013,catalytic step 2 spliceosome|G…	GO:0005515,protein binding|GO:0097159,organic cyclic compound binding|GO:0000166,nucleotide binding|GO:0036094,small molecule binding|GO:0017069,snRNA binding|GO:0003723,RNA binding|GO:0003676,nucleic acid binding|GO:1901363,heterocyclic compound binding|GO:1901265,nucleoside phosphate binding|GO:0005488,binding|GO:0030619,U1 snRNA binding|GO:0070990,snRNP binding|GO:0044877,macromolecular comple…	rno03040,Spliceosome	7	2	4	1	225	25.3	9.72	4.64	112.4	110.8	104.5	109	98.5	80.9	91.7	92.2	0.00388307	1.20204
P42854	Reg3g	Regenerating islet-derived protein 3-gamma OS=Rattus norvegicus OX=10116 GN=Reg3g PE=1 SV=1	GO:0048584,positive regulation of response to stimulus|GO:0048583,regulation of response to stimulus|GO:0031349,positive regulation of defense response|GO:0007165,signal transduction|GO:0031347,regulation of defense response|GO:0051716,cellular response to stimulus|GO:0043207,response to external biotic stimulus|GO:0048869,cellular developmental process|GO:0009617,response to bacterium|GO:0009611…	GO:0005737,cytoplasm|GO:0044464,cell part|GO:0005623,cell|GO:0005622,intracellular|GO:0005576,extracellular region|GO:0044424,intracellular part|GO:0043229,intracellular organelle|GO:0043227,membrane-bounded organelle|GO:0043226,organelle|GO:0031982,vesicle|GO:0016023,cytoplasmic, membrane-bounded vesicle|GO:0031410,cytoplasmic vesicle|GO:0031988,membrane-bounded vesicle|GO:0099503,secretory vesi…	GO:0030246,carbohydrate binding|GO:0005488,binding|GO:0097367,carbohydrate derivative binding|GO:0005539,glycosaminoglycan binding|GO:0070492,oligosaccharide binding|GO:0042834,peptidoglycan binding		6	1	1	1	174	19.1	7.69	2.59	99.6	115.7	109.8	112.2	95.2	93.7	89.7	84	0.00470316	1.20601
Q5M860	Arhgdib	Rho GDP dissociation inhibitor beta OS=Rattus norvegicus OX=10116 GN=Arhgdib PE=1 SV=1	GO:0061450,trophoblast cell migration|GO:0008152,metabolic process|GO:0019222,regulation of metabolic process|GO:2000242,negative regulation of reproductive process|GO:2000241,regulation of reproductive process|GO:0006928,movement of cell or subcellular component|GO:0032501,multicellular organismal process|GO:0044702,single organism reproductive process|GO:0001667,ameboidal-type cell migration|GO…	GO:0005737,cytoplasm|GO:0005622,intracellular|GO:0043230,extracellular organelle|GO:0031982,vesicle|GO:0044421,extracellular region part|GO:0043227,membrane-bounded organelle|GO:0005829,cytosol|GO:0016020,membrane|GO:0044464,cell part|GO:0005623,cell|GO:0031988,membrane-bounded vesicle|GO:0044444,cytoplasmic part|GO:0005576,extracellular region|GO:0044424,intracellular part|GO:1903561,extracellul…	GO:0016787,hydrolase activity|GO:0016818,hydrolase activity, acting on acid anhydrides, in phosphorus-containing anhydrides|GO:0016462,pyrophosphatase activity|GO:0005092,GDP-dissociation inhibitor activity|GO:0030234,enzyme regulator activity|GO:0003924,GTPase activity|GO:0017111,nucleoside-triphosphatase activity|GO:0005094,Rho GDP-dissociation inhibitor activity|GO:0016817,hydrolase activity, …	rno04962,Vasopressin-regulated water reabsorption|rno04722,Neurotrophin signaling pathway	26	4	8	4	200	22.9	5.11	21.03	107.7	112.3	108	109.4	90.6	89.8	90.1	92	3.56142e-06	1.20662
D3ZRX9	Cnn2	Calponin (Fragment) OS=Rattus norvegicus OX=10116 GN=Cnn2 PE=1 SV=3	GO:0032502,developmental process|GO:0051716,cellular response to stimulus|GO:0006909,phagocytosis|GO:0009893,positive regulation of metabolic process|GO:0019222,regulation of metabolic process|GO:0051049,regulation of transport|GO:0071260,cellular response to mechanical stimulus|GO:0051129,negative regulation of cellular component organization|GO:0051128,regulation of cellular component organizat…	GO:0032432,actin filament bundle|GO:0015629,actin cytoskeleton|GO:0043229,intracellular organelle|GO:0043228,non-membrane-bounded organelle|GO:0005924,cell-substrate adherens junction|GO:0005925,focal adhesion|GO:0043227,membrane-bounded organelle|GO:0043226,organelle|GO:0030054,cell junction|GO:0042641,actomyosin|GO:0005856,cytoskeleton|GO:0001725,stress fiber|GO:0031982,vesicle|GO:0016020,membr…	GO:0008092,cytoskeletal protein binding|GO:0003779,actin binding|GO:0005488,binding|GO:0005515,protein binding|GO:0005516,calmodulin binding		25	4	6	4	219	24.1	8.69	8.33	114.4	111.1	112.2	99.8	94.2	84.7	93.4	90.2	0.00302289	1.2069
Q8K585	Hmga1	High mobility group protein HMG-I/HMG-Y OS=Rattus norvegicus OX=10116 GN=Hmga1 PE=1 SV=3	GO:0080090,regulation of primary metabolic process|GO:0019222,regulation of metabolic process|GO:0048584,positive regulation of response to stimulus|GO:0048583,regulation of response to stimulus|GO:1901362,organic cyclic compound biosynthetic process|GO:0071840,cellular component organization or biogenesis|GO:0044710,single-organism metabolic process|GO:0010605,negative regulation of macromolecul…	GO:0044446,intracellular organelle part|GO:0032991,macromolecular complex|GO:0043231,intracellular membrane-bounded organelle|GO:0043232,intracellular non-membrane-bounded organelle|GO:0043227,membrane-bounded organelle|GO:0005634,nucleus|GO:0044464,cell part|GO:0005623,cell|GO:0005622,intracellular|GO:0000792,heterochromatin|GO:0043229,intracellular organelle|GO:0043228,non-membrane-bounded orga…	GO:0003712,transcription cofactor activity|GO:0005488,binding|GO:0003676,nucleic acid binding|GO:0003677,DNA binding|GO:1901363,heterocyclic compound binding|GO:0016829,lyase activity|GO:0003713,transcription coactivator activity|GO:0004520,endodeoxyribonuclease activity|GO:0003700,transcription factor activity, sequence-specific DNA binding|GO:0000989,transcription factor activity, transcription…		7	1	2	1	107	11.7	10.32	3.69	110.1	104.5	115.9	107	95.3	88.1	92.9	86.2	0.00115351	1.2069
P20595	Gucy1b1	Guanylate cyclase soluble subunit beta-1 OS=Rattus norvegicus OX=10116 GN=Gucy1b1 PE=1 SV=2	GO:0009187,cyclic nucleotide metabolic process|GO:0044237,cellular metabolic process|GO:1901564,organonitrogen compound metabolic process|GO:0044249,cellular biosynthetic process|GO:0034641,cellular nitrogen compound metabolic process|GO:0009165,nucleotide biosynthetic process|GO:0023052,signaling|GO:0007165,signal transduction|GO:0019932,second-messenger-mediated signaling|GO:0072521,purine-cont…	GO:0043234,protein complex|GO:0005737,cytoplasm|GO:0032991,macromolecular complex|GO:0043231,intracellular membrane-bounded organelle|GO:0005829,cytosol|GO:0044464,cell part|GO:0044444,cytoplasmic part|GO:0005623,cell|GO:0008074,guanylate cyclase complex, soluble|GO:0043229,intracellular organelle|GO:0044445,cytosolic part|GO:0044424,intracellular part|GO:0005622,intracellular|GO:0043227,membrane…	GO:0035639,purine ribonucleoside triphosphate binding|GO:0031072,heat shock protein binding|GO:0005488,binding|GO:0043167,ion binding|GO:1901363,heterocyclic compound binding|GO:1901265,nucleoside phosphate binding|GO:0001882,nucleoside binding|GO:0043168,anion binding|GO:0043169,cation binding|GO:0097367,carbohydrate derivative binding|GO:0016829,lyase activity|GO:0016849,phosphorus-oxygen lyase…	rno00230,Purine metabolism|rno04921,Oxytocin signaling pathway|rno04022,cGMP-PKG signaling pathway|rno04270,Vascular smooth muscle contraction|rno04540,Gap junction|rno04713,Circadian entrainment|rno04611,Platelet activation|rno04730,Long-term depression|rno04924,Renin secretion|rno04970,Salivary secretion	15	7	10	7	619	70.4	5.4	20.62	110.7	108.3	110.4	108.3	93.7	84.4	90.2	94	0.000188982	1.20811
D3ZWR1	Nt5c	5', 3'-nucleotidase, cytosolic OS=Rattus norvegicus OX=10116 GN=Nt5c PE=1 SV=3	GO:0044238,primary metabolic process|GO:0046434,organophosphate catabolic process|GO:0016311,dephosphorylation|GO:0009219,pyrimidine deoxyribonucleotide metabolic process|GO:0009166,nucleotide catabolic process|GO:0072529,pyrimidine-containing compound catabolic process|GO:0034641,cellular nitrogen compound metabolic process|GO:0006807,nitrogen compound metabolic process|GO:0044281,small molecule…	GO:0043231,intracellular membrane-bounded organelle|GO:0005737,cytoplasm|GO:0005622,intracellular|GO:0043230,extracellular organelle|GO:0031982,vesicle|GO:0044421,extracellular region part|GO:0043227,membrane-bounded organelle|GO:0005634,nucleus|GO:0044464,cell part|GO:0044444,cytoplasmic part|GO:0005739,mitochondrion|GO:0031988,membrane-bounded vesicle|GO:0043229,intracellular organelle|GO:00055…	GO:0016787,hydrolase activity|GO:0016791,phosphatase activity|GO:0097159,organic cyclic compound binding|GO:0019103,pyrimidine nucleotide binding|GO:0008253,5'-nucleotidase activity|GO:0008252,nucleotidase activity|GO:0016788,hydrolase activity, acting on ester bonds|GO:0000166,nucleotide binding|GO:0042578,phosphoric ester hydrolase activity|GO:0003824,catalytic activity|GO:0036094,small molecul…		11	2	2	2	199	22.9	6.68	1.87	107.9	96.8	120.2	113	95.1	84.6	91.3	91	0.0124222	1.20967
P83565	Mrpl40	39S ribosomal protein L40, mitochondrial OS=Rattus norvegicus OX=10116 GN=Mrpl40 PE=1 SV=2		GO:0031974,membrane-enclosed lumen|GO:0043229,intracellular organelle|GO:0043228,non-membrane-bounded organelle|GO:0043227,membrane-bounded organelle|GO:0043226,organelle|GO:0005737,cytoplasm|GO:0031981,nuclear lumen|GO:0005730,nucleolus|GO:0005634,nucleus|GO:0005739,mitochondrion|GO:0030529,intracellular ribonucleoprotein complex|GO:0005759,mitochondrial matrix|GO:0044429,mitochondrial part|GO:0…	GO:0097159,organic cyclic compound binding|GO:0044822,poly(A) RNA binding|GO:0005488,binding|GO:0003676,nucleic acid binding|GO:1901363,heterocyclic compound binding|GO:0003723,RNA binding		12	2	3	2	206	24.4	9.55	8.74	109.4	109.5	109.3	109.9	89.4	92.8	91.8	88	2.45618e-06	1.21022
P24268	Ctsd	Cathepsin D OS=Rattus norvegicus OX=10116 GN=Ctsd PE=1 SV=1	GO:0044238,primary metabolic process|GO:1901575,organic substance catabolic process|GO:0019538,protein metabolic process|GO:0006914,autophagy|GO:0009987,cellular process|GO:0044237,cellular metabolic process|GO:0043170,macromolecule metabolic process|GO:0044248,cellular catabolic process|GO:0071704,organic substance metabolic process|GO:0030163,protein catabolic process|GO:0008152,metabolic proce…	GO:0000323,lytic vacuole|GO:0048770,pigment granule|GO:0043229,intracellular organelle|GO:0043227,membrane-bounded organelle|GO:0043226,organelle|GO:0005737,cytoplasm|GO:0031982,vesicle|GO:0016023,cytoplasmic, membrane-bounded vesicle|GO:0031410,cytoplasmic vesicle|GO:0031988,membrane-bounded vesicle|GO:0005615,extracellular space|GO:0042470,melanosome|GO:0043231,intracellular membrane-bounded or…	GO:0016787,hydrolase activity|GO:0004175,endopeptidase activity|GO:0042277,peptide binding|GO:0033218,amide binding|GO:0070001,aspartic-type peptidase activity|GO:0003824,catalytic activity|GO:0070011,peptidase activity, acting on L-amino acid peptides|GO:0004190,aspartic-type endopeptidase activity|GO:0005488,binding|GO:0008233,peptidase activity		33	12	31	12	407	44.7	7.09	69.71	109.2	109.1	109	111.3	93	90.4	88.2	89.8	2.71743e-06	1.21361
Q4G075	Serpinb1a	Leukocyte elastase inhibitor A OS=Rattus norvegicus OX=10116 GN=Serpinb1a PE=1 SV=1	GO:0009894,regulation of catabolic process|GO:0009892,negative regulation of metabolic process|GO:0080090,regulation of primary metabolic process|GO:0019222,regulation of metabolic process|GO:0031324,negative regulation of cellular metabolic process|GO:0031323,regulation of cellular metabolic process|GO:0042176,regulation of protein catabolic process|GO:0043086,negative regulation of catalytic ac…	GO:0005737,cytoplasm|GO:0005615,extracellular space|GO:0044464,cell part|GO:0005623,cell|GO:0005622,intracellular|GO:0005576,extracellular region|GO:0044424,intracellular part|GO:0044421,extracellular region part	GO:0004866,endopeptidase inhibitor activity|GO:0061135,endopeptidase regulator activity|GO:0061134,peptidase regulator activity|GO:0030414,peptidase inhibitor activity|GO:0004867,serine-type endopeptidase inhibitor activity|GO:0004857,enzyme inhibitor activity|GO:0098772,molecular function regulator|GO:0030234,enzyme regulator activity	rno05146,Amoebiasis	25	9	14	9	379	42.7	6.32	25.76	113	109.4	108.6	107.7	90.1	87.4	91	92.7	1.95737e-05	1.21456
G3V712	Krt7	Keratin complex 2, basic, gene 7, isoform CRA_a OS=Rattus norvegicus OX=10116 GN=Krt7 PE=1 SV=1		GO:0005856,cytoskeleton|GO:0043234,protein complex|GO:0045111,intermediate filament cytoskeleton|GO:0043228,non-membrane-bounded organelle|GO:0043232,intracellular non-membrane-bounded organelle|GO:0045095,keratin filament|GO:0044464,cell part|GO:0005623,cell|GO:0005622,intracellular|GO:0044446,intracellular organelle part|GO:0043229,intracellular organelle|GO:0044430,cytoskeletal part|GO:0044422…	GO:0005198,structural molecule activity		33	16	36	11	457	50.8	5.87	76.65	111.7	110.5	110.3	106.5	86.3	88.5	92.5	93.7	7.88535e-05	1.21607
Q9R1T1	Banf1	Barrier-to-autointegration factor OS=Rattus norvegicus OX=10116 GN=Banf1 PE=1 SV=1	GO:0090304,nucleic acid metabolic process|GO:0034641,cellular nitrogen compound metabolic process|GO:0006807,nitrogen compound metabolic process|GO:0050789,regulation of biological process|GO:1901360,organic cyclic compound metabolic process|GO:0006139,nucleobase-containing compound metabolic process|GO:0044260,cellular macromolecule metabolic process|GO:0044419,interspecies interaction between o…	GO:0031974,membrane-enclosed lumen|GO:0043229,intracellular organelle|GO:0043228,non-membrane-bounded organelle|GO:0043227,membrane-bounded organelle|GO:0043226,organelle|GO:0005737,cytoplasm|GO:0070062,extracellular exosome|GO:0031981,nuclear lumen|GO:0005634,nucleus|GO:0031988,membrane-bounded vesicle|GO:0005654,nucleoplasm|GO:0005694,chromosome|GO:1903561,extracellular vesicle|GO:0031982,vesic…	GO:0097159,organic cyclic compound binding|GO:0005488,binding|GO:0003676,nucleic acid binding|GO:0003677,DNA binding|GO:1901363,heterocyclic compound binding|GO:0008022,protein C-terminus binding|GO:0005515,protein binding|GO:0047485,protein N-terminus binding|GO:0019899,enzyme binding|GO:0046983,protein dimerization activity|GO:0042802,identical protein binding|GO:0042803,protein homodimerizatio…		48	3	9	3	89	10	6.09	16.9	112.4	106.1	107.2	113.3	89.4	97.4	82.4	91.8	0.00163256	1.21607
F1LNT0	Dpysl4	Dihydropyrimidinase-related protein 4 OS=Rattus norvegicus OX=10116 GN=Dpysl4 PE=4 SV=1	GO:0048666,neuron development|GO:0044707,single-multicellular organism process|GO:0030030,cell projection organization|GO:0030154,cell differentiation|GO:0048468,cell development|GO:0006928,movement of cell or subcellular component|GO:0031175,neuron projection development|GO:0008219,cell death|GO:0009653,anatomical structure morphogenesis|GO:0007275,multicellular organism development|GO:0044699,s…	GO:0005737,cytoplasm|GO:0044464,cell part|GO:0005623,cell|GO:0005622,intracellular|GO:0044424,intracellular part	GO:0016787,hydrolase activity|GO:0016810,hydrolase activity, acting on carbon-nitrogen (but not peptide) bonds|GO:0003824,catalytic activity|GO:0005488,binding|GO:0005515,protein binding|GO:0008092,cytoskeletal protein binding|GO:0031005,filamin binding		3	1	4	1	572	61.9	6.98	4.38	110.2	104.6	115.8	108.4	89.5	89.1	86.4	96	0.000744768	1.21607
P12369	Prkar2b	cAMP-dependent protein kinase type II-beta regulatory subunit OS=Rattus norvegicus OX=10116 GN=Prkar2b PE=1 SV=3	GO:0043549,regulation of kinase activity|GO:0019220,regulation of phosphate metabolic process|GO:0080090,regulation of primary metabolic process|GO:0019222,regulation of metabolic process|GO:0007612,learning|GO:0007610,behavior|GO:0007611,learning or memory|GO:0044281,small molecule metabolic process|GO:0044710,single-organism metabolic process|GO:0010605,negative regulation of macromolecule meta…	GO:0044463,cell projection part|GO:1990234,transferase complex|GO:0044464,cell part|GO:0043232,intracellular non-membrane-bounded organelle|GO:0031090,organelle membrane|GO:0031975,envelope|GO:0043229,intracellular organelle|GO:0043228,non-membrane-bounded organelle|GO:0045202,synapse|GO:0005576,extracellular region|GO:0005929,cilium|GO:0005815,microtubule organizing center|GO:0043227,membrane-bo…	GO:0044389,ubiquitin-like protein ligase binding|GO:0019207,kinase regulator activity|GO:0019901,protein kinase binding|GO:0019899,enzyme binding|GO:0036094,small molecule binding|GO:0005488,binding|GO:0004857,enzyme inhibitor activity|GO:0098772,molecular function regulator|GO:1901363,heterocyclic compound binding|GO:1901265,nucleoside phosphate binding|GO:0043168,anion binding|GO:0008603,cAMP-d…	rno04910,Insulin signaling pathway	2	1	1	1	416	46.1	4.98	1.66	106.3	109.4	102.9	120.6	83.6	92.7	98.4	86.2	0.00842902	1.21696
Q5XIE1	Them6	Protein THEM6 OS=Rattus norvegicus OX=10116 GN=Them6 PE=2 SV=1		GO:0005576,extracellular region			12	2	2	2	207	23.7	8.87	5.21	112.4	108.4	109.4	109.3	95.6	87.7	87.4	89.8	8.02433e-05	1.21914
G3V9M6	Fbn1	Fibrillin 1 OS=Rattus norvegicus OX=10116 GN=Fbn1 PE=1 SV=1	GO:0071495,cellular response to endogenous stimulus|GO:1901699,cellular response to nitrogen compound|GO:0050896,response to stimulus|GO:0048583,regulation of response to stimulus|GO:0070848,response to growth factor|GO:0001501,skeletal system development|GO:0072359,circulatory system development|GO:0072358,cardiovascular system development|GO:0070887,cellular response to chemical stimulus|GO:000…	GO:0005604,basement membrane|GO:0043205,fibril|GO:0070062,extracellular exosome|GO:0044421,extracellular region part|GO:0065010,extracellular membrane-bounded organelle|GO:0031988,membrane-bounded vesicle|GO:0031012,extracellular matrix|GO:0043226,organelle|GO:0043230,extracellular organelle|GO:0043227,membrane-bounded organelle|GO:0005576,extracellular region|GO:0005615,extracellular space|GO:00…	GO:0043169,cation binding|GO:0005201,extracellular matrix structural constituent|GO:0005198,structural molecule activity|GO:0043167,ion binding|GO:0005509,calcium ion binding|GO:0046872,metal ion binding|GO:0005488,binding|GO:1901681,sulfur compound binding|GO:0005178,integrin binding|GO:0050839,cell adhesion molecule binding|GO:0097367,carbohydrate derivative binding|GO:0005539,glycosaminoglycan…		18	37	60	37	2872	311.7	4.93	95.28	108.1	109	111.8	110.8	90.2	89.5	90.4	90.2	4.42207e-07	1.22037
Q63279	Krt19	Keratin, type I cytoskeletal 19 OS=Rattus norvegicus OX=10116 GN=Krt19 PE=1 SV=2	GO:0022607,cellular component assembly|GO:0031032,actomyosin structure organization|GO:0061458,reproductive system development|GO:0048568,embryonic organ development|GO:0030154,cell differentiation|GO:0048468,cell development|GO:0030036,actin cytoskeleton organization|GO:0010927,cellular component assembly involved in morphogenesis|GO:0009790,embryo development|GO:0014070,response to organic cycl…	GO:0015629,actin cytoskeleton|GO:0044444,cytoplasmic part|GO:0030016,myofibril|GO:0030017,sarcomere|GO:0043229,intracellular organelle|GO:0043228,non-membrane-bounded organelle|GO:0005622,intracellular|GO:0043227,membrane-bounded organelle|GO:0043226,organelle|GO:0030018,Z disc|GO:0005856,cytoskeleton|GO:0098797,plasma membrane protein complex|GO:0045111,intermediate filament cytoskeleton|GO:0031…	GO:0005198,structural molecule activity|GO:0008307,structural constituent of muscle|GO:0044877,macromolecular complex binding|GO:0005488,binding|GO:0005515,protein binding|GO:0032403,protein complex binding		39	14	22	10	403	44.6	5.31	42.3	109.9	109	111.7	109.3	91.9	89	88.3	90.9	1.21607e-06	1.22161
A0A0G2JWK7	Tagln	Transgelin OS=Rattus norvegicus OX=10116 GN=Tagln PE=1 SV=1	GO:0032502,developmental process|GO:0060429,epithelium development|GO:0048869,cellular developmental process|GO:0030154,cell differentiation|GO:0009888,tissue development|GO:0044767,single-organism developmental process|GO:0044763,single-organism cellular process|GO:0030855,epithelial cell differentiation|GO:0009987,cellular process|GO:0044699,single-organism process|GO:0048856,anatomical structu…		GO:0008092,cytoskeletal protein binding|GO:0051015,actin filament binding|GO:0003779,actin binding|GO:0044877,macromolecular complex binding|GO:0005488,binding|GO:0005515,protein binding|GO:0032403,protein complex binding		43	8	40	8	207	23.3	8.66	98.05	109.9	110.1	111	109.1	90.2	90.3	87.9	91.5	3.73841e-07	1.22284
P70560	Col12a1	Collagen alpha-1(XII) chain (Fragment) OS=Rattus norvegicus OX=10116 GN=Col12a1 PE=2 SV=1	GO:0007155,cell adhesion|GO:0022610,biological adhesion	GO:0043234,protein complex|GO:0032991,macromolecular complex|GO:0005581,collagen trimer|GO:0044421,extracellular region part|GO:0031012,extracellular matrix|GO:0005576,extracellular region|GO:0030934,anchoring collagen complex|GO:0005593,FACIT collagen trimer|GO:0044420,extracellular matrix component|GO:0005578,proteinaceous extracellular matrix|GO:0005595,collagen type XII trimer	GO:0005201,extracellular matrix structural constituent|GO:0005198,structural molecule activity		10	3	4	1	317	32	8.28	4.95	107.3	104.9	110.9	117.1	92.6	88.2	83.1	96	0.00199413	1.22312
Q6MGB8	RT1-A2	RT1 class I, A2 OS=Rattus norvegicus OX=10116 GN=RT1-A2 PE=1 SV=1	GO:0002474,antigen processing and presentation of peptide antigen via MHC class I|GO:0019882,antigen processing and presentation|GO:0050896,response to stimulus|GO:0002376,immune system process|GO:0006955,immune response|GO:0048002,antigen processing and presentation of peptide antigen	GO:0042611,MHC protein complex|GO:0043234,protein complex|GO:0042612,MHC class I protein complex|GO:0032991,macromolecular complex|GO:0016021,integral component of membrane|GO:0016020,membrane|GO:0044464,cell part|GO:0005623,cell|GO:0098797,plasma membrane protein complex|GO:0098796,membrane protein complex|GO:0071944,cell periphery|GO:0005886,plasma membrane|GO:0044425,membrane part|GO:0044459,p…	GO:0042277,peptide binding|GO:0003823,antigen binding|GO:0042605,peptide antigen binding|GO:0033218,amide binding|GO:0005488,binding|GO:0005515,protein binding|GO:0005102,receptor binding		16	6	15	5	366	41.4	5.26	26.35	110.1	112.3	109.4	108.6	90.8	86.1	90.5	92.2	1.2138e-05	1.22469
Q6T5E8	Ugt1a7c	UDP-glucuronosyltransferase OS=Rattus norvegicus OX=10116 GN=Ugt1a7c PE=1 SV=1	GO:0032502,developmental process|GO:0052695,cellular glucuronidation|GO:0052696,flavonoid glucuronidation|GO:0052697,xenobiotic glucuronidation|GO:0044237,cellular metabolic process|GO:0006711,estrogen catabolic process|GO:0019752,carboxylic acid metabolic process|GO:0044248,cellular catabolic process|GO:0044723,single-organism carbohydrate metabolic process|GO:0046226,coumarin catabolic process|…	GO:0005783,endoplasmic reticulum|GO:0005789,endoplasmic reticulum membrane|GO:0042175,nuclear outer membrane-endoplasmic reticulum membrane network|GO:0043229,intracellular organelle|GO:0043227,membrane-bounded organelle|GO:0043226,organelle|GO:0005737,cytoplasm|GO:0044446,intracellular organelle part|GO:0031090,organelle membrane|GO:0016020,membrane|GO:0044432,endoplasmic reticulum part|GO:00985…	GO:0003824,catalytic activity|GO:0016740,transferase activity|GO:0016757,transferase activity, transferring glycosyl groups|GO:0016758,transferase activity, transferring hexosyl groups|GO:0015020,glucuronosyltransferase activity|GO:0008194,UDP-glycosyltransferase activity	rno00500,Starch and sucrose metabolism|rno00040,Pentose and glucuronate interconversions|rno00980,Metabolism of xenobiotics by cytochrome P450|rno00982,Drug metabolism - cytochrome P450|rno00983,Drug metabolism - other enzymes|rno00140,Steroid hormone biosynthesis|rno01100,Metabolic pathways|rno00830,Retinol metabolism|rno00053,Ascorbate and aldarate metabolism|rno05204,Chemical carcinogenesis|rn…	11	5	11	1	531	59.5	8.34	20.24	106.7	117.4	109.1	107.3	89.7	92.1	84.1	93.6	0.000776494	1.22531
Q7TQ11	Vtn	Aa1018 OS=Rattus norvegicus OX=10116 GN=Vtn PE=1 SV=1	GO:0019220,regulation of phosphate metabolic process|GO:0080090,regulation of primary metabolic process|GO:0019222,regulation of metabolic process|GO:0051049,regulation of transport|GO:0007160,cell-matrix adhesion|GO:0048260,positive regulation of receptor-mediated endocytosis|GO:0071840,cellular component organization or biogenesis|GO:0010605,negative regulation of macromolecule metabolic proces…	GO:0005783,endoplasmic reticulum|GO:0031974,membrane-enclosed lumen|GO:0031012,extracellular matrix|GO:0043229,intracellular organelle|GO:0043227,membrane-bounded organelle|GO:0043226,organelle|GO:0005737,cytoplasm|GO:0070062,extracellular exosome|GO:0005615,extracellular space|GO:0072562,blood microparticle|GO:0044421,extracellular region part|GO:0044432,endoplasmic reticulum part|GO:0044431,Gol…	GO:0038024,cargo receptor activity|GO:0050840,extracellular matrix binding|GO:0030247,polysaccharide binding|GO:0030246,carbohydrate binding|GO:0060089,molecular transducer activity|GO:0044877,macromolecular complex binding|GO:0004872,receptor activity|GO:1901681,sulfur compound binding|GO:0043167,ion binding|GO:0032403,protein complex binding|GO:0042802,identical protein binding|GO:0005178,integ…		2	1	2	1	490	55.9	5.76	2.3	106.6	106.5	110.1	117.6	92.7	85.3	92.8	88.5	0.000672888	1.22683
D3ZNZ9	Hist3h2ba	Histone H2B OS=Rattus norvegicus OX=10116 GN=Hist3h2ba PE=3 SV=1	GO:0034728,nucleosome organization|GO:0071103,DNA conformation change|GO:0022607,cellular component assembly|GO:0070271,protein complex biogenesis|GO:0043933,macromolecular complex subunit organization|GO:0016043,cellular component organization|GO:0031497,chromatin assembly|GO:0034622,cellular macromolecular complex assembly|GO:0071840,cellular component organization or biogenesis|GO:0071824,prot…	GO:0031974,membrane-enclosed lumen|GO:0044815,DNA packaging complex|GO:0043229,intracellular organelle|GO:0043228,non-membrane-bounded organelle|GO:0000785,chromatin|GO:0000786,nucleosome|GO:0000788,nuclear nucleosome|GO:0000228,nuclear chromosome|GO:0043227,membrane-bounded organelle|GO:0043226,organelle|GO:0031981,nuclear lumen|GO:0005634,nucleus|GO:0044454,nuclear chromosome part|GO:0005694,ch…	GO:0003676,nucleic acid binding|GO:0097159,organic cyclic compound binding|GO:0005488,binding|GO:0005515,protein binding|GO:0003677,DNA binding|GO:0046983,protein dimerization activity|GO:0046982,protein heterodimerization activity|GO:1901363,heterocyclic compound binding	rno05203,Viral carcinogenesis|rno05322,Systemic lupus erythematosus|rno05034,Alcoholism	50	7	55	2	126	14	10.37	112.96	103.9	110.2	110	116.8	90.3	90.6	88	90.2	0.000276107	1.22779
B1H227	Rcc1	LOC682908 protein OS=Rattus norvegicus OX=10116 GN=Rcc1 PE=1 SV=1	GO:0022607,cellular component assembly|GO:0033043,regulation of organelle organization|GO:0043933,macromolecular complex subunit organization|GO:0000280,nuclear division|GO:0000082,G1/S transition of mitotic cell cycle|GO:1903047,mitotic cell cycle process|GO:0051128,regulation of cellular component organization|GO:0044770,cell cycle phase transition|GO:0044772,mitotic cell cycle phase transition…	GO:0016020,membrane|GO:0031974,membrane-enclosed lumen|GO:0031975,envelope|GO:0043229,intracellular organelle|GO:0043228,non-membrane-bounded organelle|GO:0000785,chromatin|GO:0000228,nuclear chromosome|GO:0043227,membrane-bounded organelle|GO:0043226,organelle|GO:0005737,cytoplasm|GO:0031090,organelle membrane|GO:0031981,nuclear lumen|GO:0005634,nucleus|GO:0005635,nuclear envelope|GO:0005654,nuc…	GO:0005088,Ras guanyl-nucleotide exchange factor activity|GO:0042393,histone binding|GO:0005085,guanyl-nucleotide exchange factor activity|GO:0005087,Ran guanyl-nucleotide exchange factor activity|GO:0031491,nucleosome binding|GO:0031267,small GTPase binding|GO:0051020,GTPase binding|GO:0031492,nucleosomal DNA binding|GO:0044877,macromolecular complex binding|GO:0005488,binding|GO:0003676,nucleic…		6	2	2	2	421	45.1	7.91	2.72	101.5	112.6	114.6	112.2	95.9	78.5	82.2	102.3	0.0179346	1.22848
P63100	Ppp3r1	Calcineurin subunit B type 1 OS=Rattus norvegicus OX=10116 GN=Ppp3r1 PE=1 SV=2	GO:0071704,organic substance metabolic process|GO:0044267,cellular protein metabolic process|GO:0044260,cellular macromolecule metabolic process|GO:0044238,primary metabolic process|GO:0016311,dephosphorylation|GO:0006470,protein dephosphorylation|GO:0009987,cellular process|GO:0043412,macromolecule modification|GO:0006464,cellular protein modification process|GO:0043170,macromolecule metabolic p…	GO:0005737,cytoplasm|GO:0042383,sarcolemma|GO:0005829,cytosol|GO:0016020,membrane|GO:0044464,cell part|GO:0005623,cell|GO:0005622,intracellular|GO:0044444,cytoplasmic part|GO:0071944,cell periphery|GO:0005886,plasma membrane|GO:0044424,intracellular part|GO:0043234,protein complex|GO:0008287,protein serine/threonine phosphatase complex|GO:0032991,macromolecular complex|GO:1902494,catalytic comple…	GO:0005488,binding|GO:0016787,hydrolase activity|GO:0016791,phosphatase activity|GO:0043169,cation binding|GO:0016788,hydrolase activity, acting on ester bonds|GO:0043167,ion binding|GO:0042578,phosphoric ester hydrolase activity|GO:0003824,catalytic activity|GO:0004721,phosphoprotein phosphatase activity|GO:0005515,protein binding|GO:0046872,metal ion binding|GO:0005509,calcium ion binding|GO:00…	rno05014,Amyotrophic lateral sclerosis (ALS)|rno04380,Osteoclast differentiation|rno04370,VEGF signaling pathway|rno04922,Glucagon signaling pathway|rno04720,Long-term potentiation|rno04921,Oxytocin signaling pathway|rno04360,Axon guidance|rno04022,cGMP-PKG signaling pathway|rno04020,Calcium signaling pathway|rno04924,Renin secretion|rno04010,MAPK signaling pathway|rno04114,Oocyte meiosis|rno0466…	18	3	4	3	170	19.3	4.81	6.28	113.4	108.3	109.3	110	88.6	90.4	89.1	90.8	2.86253e-06	1.22875
B2RZ77	Dpt	Dermatopontin OS=Rattus norvegicus OX=10116 GN=Dpt PE=1 SV=1	GO:0042127,regulation of cell proliferation|GO:0008285,negative regulation of cell proliferation|GO:0009987,cellular process|GO:0071822,protein complex subunit organization|GO:0008283,cell proliferation|GO:0043933,macromolecular complex subunit organization|GO:0071840,cellular component organization or biogenesis|GO:0065007,biological regulation|GO:0016043,cellular component organization|GO:00507…	GO:0043230,extracellular organelle|GO:0070062,extracellular exosome|GO:0044421,extracellular region part|GO:0043227,membrane-bounded organelle|GO:0031988,membrane-bounded vesicle|GO:0031012,extracellular matrix|GO:0005576,extracellular region|GO:0005615,extracellular space|GO:1903561,extracellular vesicle|GO:0065010,extracellular membrane-bounded organelle|GO:0043226,organelle|GO:0031982,vesicle			5	1	1	1	202	24.2	4.86	2.8	106.6	106.9	111.5	116.2	85.6	92	91.3	90.1	0.000258234	1.22897
M0R907	Snrpd3	RCG60635, isoform CRA_b OS=Rattus norvegicus OX=10116 GN=Snrpd3 PE=1 SV=1	GO:0006479,protein methylation|GO:0022607,cellular component assembly|GO:0043933,macromolecular complex subunit organization|GO:0090304,nucleic acid metabolic process|GO:0034641,cellular nitrogen compound metabolic process|GO:0006807,nitrogen compound metabolic process|GO:0044237,cellular metabolic process|GO:0034622,cellular macromolecular complex assembly|GO:0071840,cellular component organizat…	GO:0031974,membrane-enclosed lumen|GO:0043229,intracellular organelle|GO:0030529,intracellular ribonucleoprotein complex|GO:0043227,membrane-bounded organelle|GO:0043226,organelle|GO:0034708,methyltransferase complex|GO:0034709,methylosome|GO:0005737,cytoplasm|GO:0044446,intracellular organelle part|GO:0070062,extracellular exosome|GO:0031981,nuclear lumen|GO:0005634,nucleus|GO:0031988,membrane-b…	GO:0005515,protein binding|GO:0097159,organic cyclic compound binding|GO:0044822,poly(A) RNA binding|GO:0019899,enzyme binding|GO:0071208,histone pre-mRNA DCP binding|GO:0003723,RNA binding|GO:0003676,nucleic acid binding|GO:1901363,heterocyclic compound binding|GO:0005488,binding|GO:1990446,U1 snRNP binding|GO:0030620,U2 snRNA binding|GO:0070990,snRNP binding|GO:0070034,telomerase RNA binding|GO…	rno03040,Spliceosome|rno05322,Systemic lupus erythematosus	24	2	4	2	126	13.9	10.32	10.17	116.9	112.9	105.8	105.6	88	85.7	90.8	94.3	0.000835131	1.22965
Q9ESN0	Fam129a	Protein Niban OS=Rattus norvegicus OX=10116 GN=Fam129a PE=1 SV=2	GO:0019220,regulation of phosphate metabolic process|GO:0080090,regulation of primary metabolic process|GO:0019222,regulation of metabolic process|GO:0051716,cellular response to stimulus|GO:0010605,negative regulation of macromolecule metabolic process|GO:0010604,positive regulation of macromolecule metabolic process|GO:0010608,posttranscriptional regulation of gene expression|GO:0043043,peptide…	GO:0005737,cytoplasm|GO:0005622,intracellular|GO:0043230,extracellular organelle|GO:0031982,vesicle|GO:0044421,extracellular region part|GO:0043227,membrane-bounded organelle|GO:0016020,membrane|GO:0044464,cell part|GO:0005623,cell|GO:0031988,membrane-bounded vesicle|GO:0071944,cell periphery|GO:0005886,plasma membrane|GO:0044424,intracellular part|GO:0005576,extracellular region|GO:1903561,extra…			11	8	11	8	937	103.4	4.7	12.84	110.6	110.9	108.9	111	86.9	88.1	92.4	91.1	5.25831e-06	1.23124
G3V8V1	Grn	Granulin, isoform CRA_c OS=Rattus norvegicus OX=10116 GN=Grn PE=4 SV=1	GO:0007618,mating|GO:0007617,mating behavior|GO:0048468,cell development|GO:0016358,dendrite development|GO:0007610,behavior|GO:0051656,establishment of organelle localization|GO:0031344,regulation of cell projection organization|GO:0071840,cellular component organization or biogenesis|GO:0031346,positive regulation of cell projection organization|GO:0071684,organism emergence from protective str…	GO:0043229,intracellular organelle|GO:0043227,membrane-bounded organelle|GO:0043226,organelle|GO:0005737,cytoplasm|GO:0031982,vesicle|GO:0005739,mitochondrion|GO:0031988,membrane-bounded vesicle|GO:0009986,cell surface|GO:1903561,extracellular vesicle|GO:0005615,extracellular space|GO:0043230,extracellular organelle|GO:0043231,intracellular membrane-bounded organelle|GO:0070062,extracellular exos…	GO:0003676,nucleic acid binding|GO:0097159,organic cyclic compound binding|GO:0044822,poly(A) RNA binding|GO:0003723,RNA binding|GO:0005515,protein binding|GO:1901363,heterocyclic compound binding|GO:0005488,binding		5	2	5	2	602	65.1	6.73	14.19	111.5	113.3	105	111.8	88.7	86.8	91.8	91.2	7.52626e-05	1.2318
A0A1W2Q6Q2	Dclk1	Serine/threonine-protein kinase DCLK1 OS=Rattus norvegicus OX=10116 GN=Dclk1 PE=1 SV=1	GO:0016310,phosphorylation|GO:0006807,nitrogen compound metabolic process|GO:0023052,signaling|GO:0007165,signal transduction|GO:0035556,intracellular signal transduction|GO:0050789,regulation of biological process|GO:0044699,single-organism process|GO:0044267,cellular protein metabolic process|GO:0051716,cellular response to stimulus|GO:0044260,cellular macromolecule metabolic process|GO:0071704…	GO:0044464,cell part|GO:0005623,cell|GO:0005622,intracellular	GO:0035639,purine ribonucleoside triphosphate binding|GO:0005488,binding|GO:0043167,ion binding|GO:1901363,heterocyclic compound binding|GO:1901265,nucleoside phosphate binding|GO:0043168,anion binding|GO:0000166,nucleotide binding|GO:0016740,transferase activity|GO:0004672,protein kinase activity|GO:0017076,purine nucleotide binding|GO:0005524,ATP binding|GO:0016301,kinase activity|GO:0036094,sm…		6	3	4	3	739	82	8.73	5.25	113.6	108.7	106.9	112.7	91.6	84.1	90.9	91.5	0.000130449	1.23401
A0A0G2JSQ4	Tpm1	Tropomyosin 1, alpha, isoform CRA_p OS=Rattus norvegicus OX=10116 GN=Tpm1 PE=1 SV=1					29	9	35	1	248	28.5	4.77	70.85	112.8	104.9	113.1	111.2	89.4	89.3	85.7	93.6	0.000156216	1.23464
F1MA59	Col4a1	Collagen type IV alpha 1 chain OS=Rattus norvegicus OX=10116 GN=Col4a1 PE=1 SV=1	GO:0061304,retinal blood vessel morphogenesis|GO:0071495,cellular response to endogenous stimulus|GO:0044707,single-multicellular organism process|GO:0050808,synapse organization|GO:0061326,renal tubule development|GO:0050896,response to stimulus|GO:0030154,cell differentiation|GO:0048754,branching morphogenesis of an epithelial tube|GO:0071229,cellular response to acid chemical|GO:0009719,respon…	GO:0043234,protein complex|GO:0005604,basement membrane|GO:0032991,macromolecular complex|GO:0005581,collagen trimer|GO:0044421,extracellular region part|GO:0005576,extracellular region|GO:0031012,extracellular matrix|GO:0005587,collagen type IV trimer|GO:0098645,collagen network|GO:0098644,complex of collagen trimers|GO:0098642,network-forming collagen trimer|GO:0044420,extracellular matrix comp…	GO:0005201,extracellular matrix structural constituent|GO:0019838,growth factor binding|GO:0005198,structural molecule activity|GO:0005488,binding|GO:0005515,protein binding|GO:0048407,platelet-derived growth factor binding	rno05146,Amoebiasis|rno04151,PI3K-Akt signaling pathway|rno05222,Small cell lung cancer|rno04512,ECM-receptor interaction|rno04510,Focal adhesion|rno04974,Protein digestion and absorption|rno05200,Pathways in cancer|rno04933,AGE-RAGE signaling pathway in diabetic complications	2	3	5	3	1669	160.5	8.29	3.33	104.9	115.5	112.4	109.9	95.7	82.2	93.5	86	0.00150839	1.23867
Q5EGY4	Ykt6	Synaptobrevin homolog YKT6 OS=Rattus norvegicus OX=10116 GN=Ykt6 PE=1 SV=1	GO:0008104,protein localization|GO:0008152,metabolic process|GO:0051648,vesicle localization|GO:0006904,vesicle docking involved in exocytosis|GO:0006906,vesicle fusion|GO:0006903,vesicle targeting|GO:0061025,membrane fusion|GO:0061024,membrane organization|GO:0032940,secretion by cell|GO:0051641,cellular localization|GO:0051640,organelle localization|GO:0051656,establishment of organelle localiz…	GO:0005783,endoplasmic reticulum|GO:0030425,dendrite|GO:0043229,intracellular organelle|GO:0043025,neuronal cell body|GO:0031201,SNARE complex|GO:0005622,intracellular|GO:0043227,membrane-bounded organelle|GO:0043226,organelle|GO:0031224,intrinsic component of membrane|GO:0005737,cytoplasm|GO:0042995,cell projection|GO:0070062,extracellular exosome|GO:0016023,cytoplasmic, membrane-bounded vesicle…	GO:0003824,catalytic activity|GO:0000149,SNARE binding|GO:0016417,S-acyltransferase activity|GO:0016740,transferase activity|GO:0016746,transferase activity, transferring acyl groups|GO:0016747,transferase activity, transferring acyl groups other than amino-acyl groups|GO:0005515,protein binding|GO:0005484,SNAP receptor activity|GO:0019707,protein-cysteine S-acyltransferase activity|GO:0019706,pr…	rno04130,SNARE interactions in vesicular transport	8	2	3	2	198	22.4	6.92	2.06	108.5	111.8	110	112.4	85.5	93.8	86.5	91.6	6.63495e-05	1.23867
P14668	Anxa5	Annexin A5 OS=Rattus norvegicus OX=10116 GN=Anxa5 PE=1 SV=3	GO:0022607,cellular component assembly|GO:0032102,negative regulation of response to external stimulus|GO:0010038,response to metal ion|GO:0032101,regulation of response to external stimulus|GO:0043933,macromolecular complex subunit organization|GO:0050896,response to stimulus|GO:0048585,negative regulation of response to stimulus|GO:0007596,blood coagulation|GO:0048583,regulation of response to …	GO:0014704,intercalated disc|GO:0030017,sarcomere|GO:0043229,intracellular organelle|GO:0043228,non-membrane-bounded organelle|GO:0043227,membrane-bounded organelle|GO:0043226,organelle|GO:0030054,cell junction|GO:0005737,cytoplasm|GO:0005615,extracellular space|GO:0005634,nucleus|GO:0016020,membrane|GO:0031674,I band|GO:0005576,extracellular region|GO:0030018,Z disc|GO:0042383,sarcolemma|GO:0044…	GO:0043168,anion binding|GO:0043169,cation binding|GO:0042277,peptide binding|GO:0033218,amide binding|GO:0005543,phospholipid binding|GO:0005544,calcium-dependent phospholipid binding|GO:0008289,lipid binding|GO:0019899,enzyme binding|GO:0043167,ion binding|GO:0019901,protein kinase binding|GO:0019900,kinase binding|GO:0017046,peptide hormone binding|GO:0030971,receptor tyrosine kinase binding|G…		49	13	39	13	319	35.7	5.05	92.59	108.9	112.9	110.6	110.4	87.9	88.1	91.5	89.7	1.76837e-06	1.23964
Q6AYC4	Capg	Macrophage-capping protein OS=Rattus norvegicus OX=10116 GN=Capg PE=1 SV=1	GO:0022607,cellular component assembly|GO:0006461,protein complex assembly|GO:0033043,regulation of organelle organization|GO:0030030,cell projection organization|GO:0030031,cell projection assembly|GO:1901879,regulation of protein depolymerization|GO:0051129,negative regulation of cellular component organization|GO:0051128,regulation of cellular component organization|GO:0008064,regulation of ac…	GO:0044464,cell part|GO:0048770,pigment granule|GO:0031974,membrane-enclosed lumen|GO:0043229,intracellular organelle|GO:0043228,non-membrane-bounded organelle|GO:0031988,membrane-bounded vesicle|GO:0043227,membrane-bounded organelle|GO:0043226,organelle|GO:0005856,cytoskeleton|GO:0072686,mitotic spindle|GO:0070062,extracellular exosome|GO:0031981,nuclear lumen|GO:0005730,nucleolus|GO:0016023,cyt…	GO:0003779,actin binding|GO:0005488,binding|GO:0005515,protein binding|GO:0008092,cytoskeletal protein binding|GO:0051015,actin filament binding|GO:0045296,cadherin binding|GO:0044877,macromolecular complex binding|GO:0019904,protein domain specific binding|GO:0032403,protein complex binding|GO:0050839,cell adhesion molecule binding		23	6	9	6	349	38.8	6.55	25.55	112.7	110.2	109.1	110.8	91.5	88.3	90.1	87.2	2.13266e-06	1.23999
A2RUV9	Aebp1	Adipocyte enhancer-binding protein 1 OS=Rattus norvegicus OX=10116 GN=Aebp1 PE=2 SV=1	GO:0009892,negative regulation of metabolic process|GO:0080090,regulation of primary metabolic process|GO:0009890,negative regulation of biosynthetic process|GO:0031327,negative regulation of cellular biosynthetic process|GO:0031326,regulation of cellular biosynthetic process|GO:0031324,negative regulation of cellular metabolic process|GO:0031323,regulation of cellular metabolic process|GO:009030…	GO:0043231,intracellular membrane-bounded organelle|GO:0005737,cytoplasm|GO:0005622,intracellular|GO:0043230,extracellular organelle|GO:0070062,extracellular exosome|GO:0044421,extracellular region part|GO:0043227,membrane-bounded organelle|GO:0005634,nucleus|GO:0044464,cell part|GO:0005623,cell|GO:0031988,membrane-bounded vesicle|GO:0031012,extracellular matrix|GO:0043229,intracellular organelle…	GO:0003714,transcription corepressor activity|GO:0001012,RNA polymerase II regulatory region DNA binding|GO:0008238,exopeptidase activity|GO:0008270,zinc ion binding|GO:0003676,nucleic acid binding|GO:0003677,DNA binding|GO:0008233,peptidase activity|GO:0008235,metalloexopeptidase activity|GO:1901363,heterocyclic compound binding|GO:0008237,metallopeptidase activity|GO:0043565,sequence-specific D…		2	2	3	2	1128	128	5.2	2.2	105.3	108.2	111.2	118.2	88.2	89.6	86.9	92.4	0.000382875	1.24027
D3ZVK7	Hist1h2ak	Histone H2A OS=Rattus norvegicus OX=10116 GN=Hist1h2ak PE=3 SV=1	GO:0009892,negative regulation of metabolic process|GO:0080090,regulation of primary metabolic process|GO:0009890,negative regulation of biosynthetic process|GO:0031327,negative regulation of cellular biosynthetic process|GO:0031326,regulation of cellular biosynthetic process|GO:0031324,negative regulation of cellular metabolic process|GO:0031323,regulation of cellular metabolic process|GO:004002…	GO:0044815,DNA packaging complex|GO:0043229,intracellular organelle|GO:0043228,non-membrane-bounded organelle|GO:0000785,chromatin|GO:0000786,nucleosome|GO:0043227,membrane-bounded organelle|GO:0043226,organelle|GO:0005634,nucleus|GO:0005694,chromosome|GO:0043234,protein complex|GO:0032991,macromolecular complex|GO:0043231,intracellular membrane-bounded organelle|GO:0043232,intracellular non-memb…	GO:0003676,nucleic acid binding|GO:0097159,organic cyclic compound binding|GO:0005488,binding|GO:0005515,protein binding|GO:0003677,DNA binding|GO:0046983,protein dimerization activity|GO:0046982,protein heterodimerization activity|GO:1901363,heterocyclic compound binding	rno05322,Systemic lupus erythematosus|rno05034,Alcoholism	27	3	44	1	130	14.1	11.05	97.08	106.3	111	111.2	114.5	95.5	88.6	84.6	88.2	0.000270764	1.24124
A0A0G2JXN6	Lgals3	Galectin OS=Rattus norvegicus OX=10116 GN=Lgals3 PE=1 SV=1	GO:2001234,negative regulation of apoptotic signaling pathway|GO:2001236,regulation of extrinsic apoptotic signaling pathway|GO:2001237,negative regulation of extrinsic apoptotic signaling pathway|GO:2001233,regulation of apoptotic signaling pathway|GO:0070232,regulation of T cell apoptotic process|GO:0051049,regulation of transport|GO:0048585,negative regulation of response to stimulus|GO:007023…	GO:0044464,cell part|GO:0031975,envelope|GO:0043229,intracellular organelle|GO:0071944,cell periphery|GO:0043227,membrane-bounded organelle|GO:0043226,organelle|GO:0005737,cytoplasm|GO:0031090,organelle membrane|GO:0005615,extracellular space|GO:0005634,nucleus|GO:0016020,membrane|GO:0044444,cytoplasmic part|GO:0005739,mitochondrion|GO:0044459,plasma membrane part|GO:0031982,vesicle|GO:0031967,or…	GO:0042056,chemoattractant activity|GO:0043236,laminin binding|GO:0005515,protein binding|GO:0050840,extracellular matrix binding|GO:0019863,IgE binding|GO:0030246,carbohydrate binding|GO:0019865,immunoglobulin binding|GO:0044877,macromolecular complex binding|GO:0003723,RNA binding|GO:0003676,nucleic acid binding|GO:0097159,organic cyclic compound binding|GO:0032403,protein complex binding|GO:19…		14	3	5	3	265	27.6	8.87	14.32	110.6	110.5	111.7	110.2	92.1	89.1	89.4	86.3	2.2343e-06	1.24124
P28064	Psmb8	Proteasome subunit beta type-8 OS=Rattus norvegicus OX=10116 GN=Psmb8 PE=1 SV=3	GO:0030154,cell differentiation|GO:0044248,cellular catabolic process|GO:0045444,fat cell differentiation|GO:0043632,modification-dependent macromolecule catabolic process|GO:0044699,single-organism process|GO:0044267,cellular protein metabolic process|GO:1901575,organic substance catabolic process|GO:0044265,cellular macromolecule catabolic process|GO:0044260,cellular macromolecule metabolic pro…	GO:0043229,intracellular organelle|GO:0000502,proteasome complex|GO:0043227,membrane-bounded organelle|GO:0043226,organelle|GO:0005737,cytoplasm|GO:0031982,vesicle|GO:0005634,nucleus|GO:0031988,membrane-bounded vesicle|GO:1990111,spermatoproteasome complex|GO:0032991,macromolecular complex|GO:1903561,extracellular vesicle|GO:0005839,proteasome core complex|GO:0043234,protein complex|GO:0043230,ex…	GO:0016787,hydrolase activity|GO:0004175,endopeptidase activity|GO:0004298,threonine-type endopeptidase activity|GO:0003824,catalytic activity|GO:0070003,threonine-type peptidase activity|GO:0070011,peptidase activity, acting on L-amino acid peptides|GO:0008233,peptidase activity	rno03050,Proteasome	4	1	2	1	276	30.6	7.42	5.81	109.2	120.3	101.4	112.1	90.3	94.2	89.3	83.1	0.00315418	1.24124
Q7TPJ3	Gusb	Beta-glucuronidase OS=Rattus norvegicus OX=10116 GN=Gusb PE=1 SV=1	GO:0044238,primary metabolic process|GO:0005975,carbohydrate metabolic process|GO:0008152,metabolic process|GO:0071704,organic substance metabolic process	GO:0000323,lytic vacuole|GO:0043229,intracellular organelle|GO:0043227,membrane-bounded organelle|GO:0043226,organelle|GO:0005737,cytoplasm|GO:0031982,vesicle|GO:0005773,vacuole|GO:0016020,membrane|GO:0031988,membrane-bounded vesicle|GO:1903561,extracellular vesicle|GO:0070062,extracellular exosome|GO:0043230,extracellular organelle|GO:0043231,intracellular membrane-bounded organelle|GO:0044464,c…	GO:0016787,hydrolase activity|GO:0004566,beta-glucuronidase activity|GO:0016798,hydrolase activity, acting on glycosyl bonds|GO:0003824,catalytic activity|GO:0019904,protein domain specific binding|GO:0005515,protein binding|GO:0004553,hydrolase activity, hydrolyzing O-glycosyl compounds|GO:0005102,receptor binding|GO:0005488,binding		8	5	5	5	808	92.5	6.83	8.7	110.5	112.7	113.8	106.2	87.4	88.2	94.8	86.5	0.000142183	1.2418
Q07936	Anxa2	Annexin A2 OS=Rattus norvegicus OX=10116 GN=Anxa2 PE=1 SV=2	GO:0008104,protein localization|GO:0019220,regulation of phosphate metabolic process|GO:0080090,regulation of primary metabolic process|GO:0019222,regulation of metabolic process|GO:0051049,regulation of transport|GO:0048585,negative regulation of response to stimulus|GO:0006906,vesicle fusion|GO:0048583,regulation of response to stimulus|GO:0006900,membrane budding|GO:0061025,membrane fusion|GO:…	GO:0019897,extrinsic component of plasma membrane|GO:0098590,plasma membrane region|GO:0042995,cell projection|GO:0005811,lipid particle|GO:0000323,lytic vacuole|GO:0044421,extracellular region part|GO:0044464,cell part|GO:0048770,pigment granule|GO:0031012,extracellular matrix|GO:0043229,intracellular organelle|GO:0043228,non-membrane-bounded organelle|GO:0005623,cell|GO:0032991,macromolecular c…	GO:0048306,calcium-dependent protein binding|GO:0003779,actin binding|GO:0019899,enzyme binding|GO:0031267,small GTPase binding|GO:0051020,GTPase binding|GO:0004859,phospholipase inhibitor activity|GO:0005488,binding|GO:0003676,nucleic acid binding|GO:0004857,enzyme inhibitor activity|GO:0098772,molecular function regulator|GO:1901363,heterocyclic compound binding|GO:0043168,anion binding|GO:0019…		36	13	46	13	339	38.7	7.69	114.04	110.3	110.6	110.8	111.6	89.6	88.4	88.4	90.2	1.41249e-08	1.24313
A0A0G2KAJ7	Col12a1	Collagen alpha-1(XII) chain OS=Rattus norvegicus OX=10116 GN=Col12a1 PE=1 SV=1	GO:0035987，endodermal cell differentiation				16	43	62	41	3143	342.3	5.64	114.59	109.9	111.9	110.8	111.3	90.1	89	90	86.9	2.28302e-07	1.24691
Q08013	Ssr3	Translocon-associated protein subunit gamma OS=Rattus norvegicus OX=10116 GN=Ssr3 PE=1 SV=2	GO:0008104,protein localization|GO:0006613,cotranslational protein targeting to membrane|GO:0006612,protein targeting to membrane|GO:0061024,membrane organization|GO:0044699,single-organism process|GO:0070727,cellular macromolecule localization|GO:0006886,intracellular protein transport|GO:0016043,cellular component organization|GO:0071840,cellular component organization or biogenesis|GO:0071702,…	GO:0005784,Sec61 translocon complex|GO:0005783,endoplasmic reticulum|GO:0044464,cell part|GO:0005789,endoplasmic reticulum membrane|GO:0042175,nuclear outer membrane-endoplasmic reticulum membrane network|GO:0043229,intracellular organelle|GO:0030176,integral component of endoplasmic reticulum membrane|GO:0031301,integral component of organelle membrane|GO:0031300,intrinsic component of organelle…		rno04141,Protein processing in endoplasmic reticulum	8	1	1	1	185	21.1	9.61	4.03	101.2	113.8	117.5	111.9	92.2	84.4	93.9	85.1	0.00198624	1.24972
B0BN99	Hmgb3	Hmgb3 protein OS=Rattus norvegicus OX=10116 GN=Hmgb3 PE=1 SV=1	GO:0071103,DNA conformation change|GO:0080090,regulation of primary metabolic process|GO:0019222,regulation of metabolic process|GO:0043933,macromolecular complex subunit organization|GO:0031326,regulation of cellular biosynthetic process|GO:0030154,cell differentiation|GO:0031323,regulation of cellular metabolic process|GO:0016070,RNA metabolic process|GO:0090304,nucleic acid metabolic process|G…	GO:0043231,intracellular membrane-bounded organelle|GO:0005634,nucleus|GO:0044464,cell part|GO:0005623,cell|GO:0005622,intracellular|GO:0043229,intracellular organelle|GO:0044424,intracellular part|GO:0043227,membrane-bounded organelle|GO:0043226,organelle	GO:0000400,four-way junction DNA binding|GO:0097159,organic cyclic compound binding|GO:0000217,DNA secondary structure binding|GO:0043566,structure-specific DNA binding|GO:0008301,DNA binding, bending|GO:0005488,binding|GO:0003676,nucleic acid binding|GO:0003677,DNA binding|GO:0044877,macromolecular complex binding|GO:0003682,chromatin binding|GO:1901363,heterocyclic compound binding		7	1	2	1	200	23	8.37	3.12	98.9	102.1	131.4	112.4	92.5	86.6	85.8	90.3	0.0243107	1.25225
F1LRL9	Map1b	Microtubule-associated protein 1B OS=Rattus norvegicus OX=10116 GN=Map1b PE=1 SV=1	GO:0048675,axon extension|GO:0048589,developmental growth|GO:0048588,developmental cell growth|GO:0051049,regulation of transport|GO:0032386,regulation of intracellular transport|GO:0032387,negative regulation of intracellular transport|GO:0048468,cell development|GO:0016358,dendrite development|GO:0007163,establishment or maintenance of cell polarity|GO:0051654,establishment of mitochondrion loc…	GO:0043229,intracellular organelle|GO:0043228,non-membrane-bounded organelle|GO:0045202,synapse|GO:0005929,cilium|GO:0005874,microtubule|GO:0043226,organelle|GO:0005856,cytoskeleton|GO:0072372,primary cilium|GO:0016020,membrane|GO:0031513,nonmotile primary cilium|GO:0097458,neuron part|GO:0044456,synapse part|GO:0005737,cytoplasm|GO:0015630,microtubule cytoskeleton|GO:0071944,cell periphery|GO:00…	GO:0015631,tubulin binding|GO:0008092,cytoskeletal protein binding|GO:0008017,microtubule binding|GO:0044877,macromolecular complex binding|GO:0005488,binding|GO:0005515,protein binding|GO:0032403,protein complex binding		1	3	4	3	2461	269.5	4.81	7.76	106.5	116.5	110.7	111.3	88.6	84.1	92.8	89.6	0.000172211	1.25317
A0A0G2JV54	Ptbp3	Polypyrimidine tract-binding protein 3 OS=Rattus norvegicus OX=10116 GN=Ptbp3 PE=1 SV=1	GO:0033119,negative regulation of RNA splicing|GO:0009892,negative regulation of metabolic process|GO:0080090,regulation of primary metabolic process|GO:0019222,regulation of metabolic process|GO:0031324,negative regulation of cellular metabolic process|GO:0031323,regulation of cellular metabolic process|GO:0090304,nucleic acid metabolic process|GO:0010629,negative regulation of gene expression|G…	GO:0043231,intracellular membrane-bounded organelle|GO:0005634,nucleus|GO:0044464,cell part|GO:0005623,cell|GO:0005622,intracellular|GO:0043229,intracellular organelle|GO:0044424,intracellular part|GO:0043227,membrane-bounded organelle|GO:0043226,organelle	GO:0097159,organic cyclic compound binding|GO:0005488,binding|GO:0003676,nucleic acid binding|GO:1901363,heterocyclic compound binding|GO:0003723,RNA binding		5	3	5	1	554	59.8	8.94	13.79	113.8	110.5	108.2	112.6	88.8	86.5	91.7	87.8	9.62335e-06	1.25451
P55770	Snu13	NHP2-like protein 1 OS=Rattus norvegicus OX=10116 GN=Snu13 PE=2 SV=4	GO:0090304,nucleic acid metabolic process|GO:0034641,cellular nitrogen compound metabolic process|GO:0006807,nitrogen compound metabolic process|GO:1901360,organic cyclic compound metabolic process|GO:0006139,nucleobase-containing compound metabolic process|GO:0044260,cellular macromolecule metabolic process|GO:0042254,ribosome biogenesis|GO:0071704,organic substance metabolic process|GO:0010467,…	GO:0031974,membrane-enclosed lumen|GO:0043229,intracellular organelle|GO:0043228,non-membrane-bounded organelle|GO:0043227,membrane-bounded organelle|GO:0043226,organelle|GO:0031981,nuclear lumen|GO:0005730,nucleolus|GO:0005634,nucleus|GO:0030529,intracellular ribonucleoprotein complex|GO:0032991,macromolecular complex|GO:0043231,intracellular membrane-bounded organelle|GO:0043232,intracellular n…	GO:0097159,organic cyclic compound binding|GO:0005488,binding|GO:0003676,nucleic acid binding|GO:1901363,heterocyclic compound binding|GO:0003723,RNA binding|GO:0034512,box C/D snoRNA binding|GO:0030515,snoRNA binding|GO:0030621,U4 snRNA binding|GO:0051117,ATPase binding|GO:0030622,U4atac snRNA binding|GO:0019899,enzyme binding|GO:0017069,snRNA binding|GO:0005515,protein binding|GO:0034511,U3 sno…	rno03040,Spliceosome|rno03008,Ribosome biogenesis in eukaryotes	28	3	6	3	128	14.2	8.46	5.94	112.1	108.9	111.8	112.6	86.6	89	87.8	91.2	2.13337e-06	1.25606
D4A3X3	Isg15	ISG15 ubiquitin-like modifier OS=Rattus norvegicus OX=10116 GN=Isg15 PE=1 SV=1	GO:0080090,regulation of primary metabolic process|GO:0019222,regulation of metabolic process|GO:0032846,positive regulation of homeostatic process|GO:0032844,regulation of homeostatic process|GO:0032020,ISG15-protein conjugation|GO:0010605,negative regulation of macromolecule metabolic process|GO:0043207,response to external biotic stimulus|GO:0071704,organic substance metabolic process|GO:00488…	GO:0005576,extracellular region	GO:0031386,protein tag	rno04622,RIG-I-like receptor signaling pathway	10	1	1	1	161	18.2	8.02	2.71	112.5	125.3	95.5	112.3	89.4	85.4	97.1	82.6	0.0161486	1.25698
G3V8C3	Vim	Vimentin OS=Rattus norvegicus OX=10116 GN=Vim PE=1 SV=1	GO:0019222,regulation of metabolic process|GO:0048468,cell development|GO:0007165,signal transduction|GO:0007166,cell surface receptor signaling pathway|GO:0007167,enzyme linked receptor protein signaling pathway|GO:0031345,negative regulation of cell projection organization|GO:0031344,regulation of cell projection organization|GO:0071840,cellular component organization or biogenesis|GO:0051716,c…	GO:0042579,microbody|GO:0043229,intracellular organelle|GO:0043228,non-membrane-bounded organelle|GO:0005924,cell-substrate adherens junction|GO:0005925,focal adhesion|GO:0043227,membrane-bounded organelle|GO:0043226,organelle|GO:0030054,cell junction|GO:0030055,cell-substrate junction|GO:0005856,cytoskeleton|GO:0045111,intermediate filament cytoskeleton|GO:0042995,cell projection|GO:0031982,vesi…	GO:0001948,glycoprotein binding|GO:0008022,protein C-terminus binding|GO:0005200,structural constituent of cytoskeleton|GO:0019215,intermediate filament binding|GO:0005515,protein binding|GO:0097367,carbohydrate derivative binding|GO:0097159,organic cyclic compound binding|GO:0005212,structural constituent of eye lens|GO:0005198,structural molecule activity|GO:0097110,scaffold protein binding|GO:…		56	27	58	22	466	53.7	5.12	143.7	111.2	110.6	112	112.4	88	88.5	88.5	88.8	3.03012e-09	1.26116
Q5FVL2	Emc8	ER membrane protein complex subunit 8 OS=Rattus norvegicus OX=10116 GN=Emc8 PE=2 SV=1		GO:0005783,endoplasmic reticulum|GO:0005789,endoplasmic reticulum membrane|GO:0042175,nuclear outer membrane-endoplasmic reticulum membrane network|GO:0043229,intracellular organelle|GO:0030176,integral component of endoplasmic reticulum membrane|GO:0031301,integral component of organelle membrane|GO:0031300,intrinsic component of organelle membrane|GO:0043227,membrane-bounded organelle|GO:004322…			9	2	2	2	207	23.4	6.15	2.87	117	103.8	112.4	113	98.4	96.9	78.1	80.4	0.00858832	1.26116
P04550	Ptms	Parathymosin OS=Rattus norvegicus OX=10116 GN=Ptms PE=1 SV=2	GO:0009892,negative regulation of metabolic process|GO:0019222,regulation of metabolic process|GO:0050790,regulation of catalytic activity|GO:0050789,regulation of biological process|GO:0002376,immune system process|GO:0065007,biological regulation|GO:0008152,metabolic process|GO:0044092,negative regulation of molecular function|GO:0048519,negative regulation of biological process|GO:0065009,regu…	GO:0005737,cytoplasm|GO:0005829,cytosol|GO:0044464,cell part|GO:0005623,cell|GO:0005622,intracellular|GO:0044444,cytoplasmic part|GO:0044424,intracellular part	GO:0043169,cation binding|GO:0098772,molecular function regulator|GO:0046914,transition metal ion binding|GO:0030234,enzyme regulator activity|GO:0043167,ion binding|GO:0008270,zinc ion binding|GO:0004857,enzyme inhibitor activity|GO:0046872,metal ion binding|GO:0005488,binding		11	1	4	1	102	11.6	4.2	9.03	101.4	108	110	127	82.8	91.9	88	90.9	0.0072424	1.26244
F1LXS3	Matn2	Matrilin 2 OS=Rattus norvegicus OX=10116 GN=Matn2 PE=4 SV=3	GO:0032502,developmental process|GO:0044707,single-multicellular organism process|GO:0030030,cell projection organization|GO:0030154,cell differentiation|GO:0048468,cell development|GO:0016358,dendrite development|GO:0006928,movement of cell or subcellular component|GO:0032501,multicellular organismal process|GO:0001764,neuron migration|GO:0031175,neuron projection development|GO:0007411,axon gui…	GO:0005604,basement membrane|GO:0005578,proteinaceous extracellular matrix|GO:0005576,extracellular region|GO:0031012,extracellular matrix|GO:0044420,extracellular matrix component|GO:0044421,extracellular region part|GO:0005615,extracellular space	GO:0043169,cation binding|GO:0043167,ion binding|GO:0005488,binding|GO:0046872,metal ion binding|GO:0005509,calcium ion binding		3	2	3	2	941	104.9	6.7	2.2	126.9	103.4	112.6	103.6	94.2	78.4	92.1	88.9	0.0120869	1.26273
P11762	Lgals1	Galectin-1 OS=Rattus norvegicus OX=10116 GN=Lgals1 PE=1 SV=2	GO:0034117,erythrocyte aggregation|GO:0034112,positive regulation of homotypic cell-cell adhesion|GO:0034110,regulation of homotypic cell-cell adhesion|GO:0048584,positive regulation of response to stimulus|GO:0048583,regulation of response to stimulus|GO:0048678,response to axon injury|GO:0034118,regulation of erythrocyte aggregation|GO:0007162,negative regulation of cell adhesion|GO:0007165,sig…	GO:0031012,extracellular matrix|GO:0043229,intracellular organelle|GO:0043227,membrane-bounded organelle|GO:0043226,organelle|GO:0005737,cytoplasm|GO:0070062,extracellular exosome|GO:0005634,nucleus|GO:0031988,membrane-bounded vesicle|GO:0009986,cell surface|GO:0031982,vesicle|GO:1903561,extracellular vesicle|GO:0005615,extracellular space|GO:0043230,extracellular organelle|GO:0043231,intracellul…	GO:0004871,signal transducer activity|GO:0050840,extracellular matrix binding|GO:0030246,carbohydrate binding|GO:0060089,molecular transducer activity|GO:0005488,binding|GO:0003676,nucleic acid binding|GO:0016936,galactoside binding|GO:0070492,oligosaccharide binding|GO:1901363,heterocyclic compound binding|GO:0001948,glycoprotein binding|GO:0042802,identical protein binding|GO:0042803,protein ho…		47	7	18	7	135	14.8	5.26	45.44	110.3	110.4	113.8	112	87.5	88.8	87.6	89.6	3.35923e-07	1.26308
A0A0G2JZV8	Fmr1	Synaptic functional regulator FMR1 OS=Rattus norvegicus OX=10116 GN=Fmr1 PE=1 SV=1	GO:0033044,regulation of chromosome organization|GO:0019226,transmission of nerve impulse|GO:0044238,primary metabolic process|GO:0019220,regulation of phosphate metabolic process|GO:0080090,regulation of primary metabolic process|GO:0019222,regulation of metabolic process|GO:0050684,regulation of mRNA processing|GO:0032386,regulation of intracellular transport|GO:0048584,positive regulation of r…	GO:0097458,neuron part|GO:0035770,ribonucleoprotein granule|GO:0032797,SMN complex|GO:0044464,cell part|GO:1990124,messenger ribonucleoprotein complex|GO:0030427,site of polarized growth|GO:0030426,growth cone|GO:0031974,membrane-enclosed lumen|GO:0043229,intracellular organelle|GO:0043228,non-membrane-bounded organelle|GO:0036464,cytoplasmic ribonucleoprotein granule|GO:0043227,membrane-bounded …	GO:0042393,histone binding|GO:0033592,RNA strand annealing activity|GO:0031369,translation initiation factor binding|GO:0034046,poly(G) binding|GO:0044877,macromolecular complex binding|GO:0005488,binding|GO:0003676,nucleic acid binding|GO:0008187,poly-pyrimidine tract binding|GO:0035064,methylated histone binding|GO:0044325,ion channel binding|GO:0048027,mRNA 5'-UTR binding|GO:0097617,annealing …		5	3	3	3	614	68.9	7.42	2.58	100.9	132.7	107.3	105.6	79.8	84.2	94.6	94.8	0.0281542	1.26344
P08721	Spp1	Osteopontin OS=Rattus norvegicus OX=10116 GN=Spp1 PE=1 SV=2	GO:0048671,negative regulation of collateral sprouting|GO:0048670,regulation of collateral sprouting|GO:0048673,collateral sprouting of intact axon in response to injury|GO:0048588,developmental cell growth|GO:0048585,negative regulation of response to stimulus|GO:0048583,regulation of response to stimulus|GO:0032846,positive regulation of homeostatic process|GO:0032844,regulation of homeostatic …	GO:0005737,cytoplasm|GO:0045177,apical part of cell|GO:0042995,cell projection|GO:0043230,extracellular organelle|GO:0031982,vesicle|GO:0044421,extracellular region part|GO:0043227,membrane-bounded organelle|GO:0044464,cell part|GO:0005623,cell|GO:0031988,membrane-bounded vesicle|GO:0044444,cytoplasmic part|GO:0005576,extracellular region|GO:0005615,extracellular space|GO:0044424,intracellular pa…	GO:0005125,cytokine activity|GO:0050840,extracellular matrix binding|GO:0005488,binding|GO:0005515,protein binding|GO:0005102,receptor binding	rno04620,Toll-like receptor signaling pathway|rno04512,ECM-receptor interaction|rno04151,PI3K-Akt signaling pathway|rno04510,Focal adhesion	3	1	3	1	317	34.9	4.53	2.22	109.7	104.7	113.1	119.8	95.5	84.2	84.8	88.2	0.00117917	1.26822
D4A1R8	Cpne1	Copine-1 OS=Rattus norvegicus OX=10116 GN=Cpne1 PE=1 SV=1	GO:0080090,regulation of primary metabolic process|GO:0019222,regulation of metabolic process|GO:0031326,regulation of cellular biosynthetic process|GO:0030154,cell differentiation|GO:0031323,regulation of cellular metabolic process|GO:0090304,nucleic acid metabolic process|GO:0044249,cellular biosynthetic process|GO:0034641,cellular nitrogen compound metabolic process|GO:0006807,nitrogen compoun…	GO:0005737,cytoplasm|GO:0043231,intracellular membrane-bounded organelle|GO:0005634,nucleus|GO:0016020,membrane|GO:0044464,cell part|GO:0005623,cell|GO:0005622,intracellular|GO:0043229,intracellular organelle|GO:0071944,cell periphery|GO:0005886,plasma membrane|GO:0044424,intracellular part|GO:0043227,membrane-bounded organelle|GO:0043226,organelle			2	1	2	1	536	58.8	5.64	3.79	108.5	116.2	113.1	109.8	90.1	87.1	87.9	87.3	1.40553e-05	1.27015
F1LMW7	Marcks	Myristoylated alanine-rich C-kinase substrate OS=Rattus norvegicus OX=10116 GN=Marcks PE=1 SV=3	GO:0022607,cellular component assembly|GO:0061572,actin filament bundle organization|GO:0070271,protein complex biogenesis|GO:0043933,macromolecular complex subunit organization|GO:0030036,actin cytoskeleton organization|GO:0071840,cellular component organization or biogenesis|GO:0071822,protein complex subunit organization|GO:0097435,fibril organization|GO:0051260,protein homooligomerization|GO:…	GO:0043229,intracellular organelle|GO:0043228,non-membrane-bounded organelle|GO:0005924,cell-substrate adherens junction|GO:0005815,microtubule organizing center|GO:0043227,membrane-bounded organelle|GO:0043226,organelle|GO:0030054,cell junction|GO:0030055,cell-substrate junction|GO:0005856,cytoskeleton|GO:0005925,focal adhesion|GO:0031982,vesicle|GO:0005813,centrosome|GO:0005634,nucleus|GO:00160…	GO:0005080,protein kinase C binding|GO:0019899,enzyme binding|GO:0019901,protein kinase binding|GO:0019900,kinase binding|GO:0005516,calmodulin binding|GO:0005515,protein binding|GO:0005488,binding|GO:0008092,cytoskeletal protein binding|GO:0051015,actin filament binding|GO:0003779,actin binding|GO:0044877,macromolecular complex binding|GO:0032403,protein complex binding|GO:0042802,identical prot…		6	1	1	1	309	29.9	4.36	2.18	114.8	115.5	113.5	105	97.3	93.9	81	79.1	0.00327145	1.27754
Q9R175	Ifitm2	Interferon-induced transmembrane protein 2 OS=Rattus norvegicus OX=10116 GN=Ifitm2 PE=1 SV=1	GO:0072359,circulatory system development|GO:0072358,cardiovascular system development|GO:0007275,multicellular organism development|GO:0044699,single-organism process|GO:0043207,response to external biotic stimulus|GO:0009615,response to virus|GO:0048513,animal organ development|GO:0009605,response to external stimulus|GO:0032502,developmental process|GO:0032501,multicellular organismal process|…	GO:0044425,membrane part|GO:0016021,integral component of membrane|GO:0016020,membrane|GO:0031224,intrinsic component of membrane			6	1	1	1	144	15.7	7.3	2.93	115.9	112.8	111.7	109.3	89.3	87.7	86.3	87	3.24037e-06	1.28376
P15865	Hist1h1e	Histone H1.4 OS=Rattus norvegicus OX=10116 GN=Hist1h1e PE=1 SV=3	GO:0080090,regulation of primary metabolic process|GO:0019222,regulation of metabolic process|GO:1901362,organic cyclic compound biosynthetic process|GO:1901360,organic cyclic compound metabolic process|GO:0010605,negative regulation of macromolecule metabolic process|GO:0048519,negative regulation of biological process|GO:0060255,regulation of macromolecule metabolic process|GO:0065004,protein-D…	GO:0031974,membrane-enclosed lumen|GO:0044815,DNA packaging complex|GO:0043229,intracellular organelle|GO:0043228,non-membrane-bounded organelle|GO:0000785,chromatin|GO:0000786,nucleosome|GO:0000228,nuclear chromosome|GO:0043227,membrane-bounded organelle|GO:0043226,organelle|GO:0070062,extracellular exosome|GO:0031981,nuclear lumen|GO:0005634,nucleus|GO:0031988,membrane-bounded vesicle|GO:004445…	GO:0043566,structure-specific DNA binding|GO:0097159,organic cyclic compound binding|GO:0044822,poly(A) RNA binding|GO:0031490,chromatin DNA binding|GO:0044877,macromolecular complex binding|GO:0003723,RNA binding|GO:0003676,nucleic acid binding|GO:0003677,DNA binding|GO:0003682,chromatin binding|GO:1901363,heterocyclic compound binding|GO:0005488,binding|GO:0035639,purine ribonucleoside triphosp…		41	12	55	2	219	22	11.11	122.36	109.3	109.7	115.9	114.9	87.7	87.7	85.7	89.1	1.05638e-05	1.28441
P55213	Casp3	Caspase-3 OS=Rattus norvegicus OX=10116 GN=Casp3 PE=2 SV=2	GO:0042130,negative regulation of T cell proliferation|GO:0032025,response to cobalt ion|GO:0043549,regulation of kinase activity|GO:0019220,regulation of phosphate metabolic process|GO:0080090,regulation of primary metabolic process|GO:0019222,regulation of metabolic process|GO:0034110,regulation of homotypic cell-cell adhesion|GO:0009636,response to toxic substance|GO:0007610,behavior|GO:000761…	GO:0031264,death-inducing signaling complex|GO:0071944,cell periphery|GO:0043227,membrane-bounded organelle|GO:0043226,organelle|GO:0005737,cytoplasm|GO:0005634,nucleus|GO:0016020,membrane|GO:0044459,plasma membrane part|GO:0098589,membrane region|GO:0005886,plasma membrane|GO:0043234,protein complex|GO:0032991,macromolecular complex|GO:0043231,intracellular membrane-bounded organelle|GO:0005829,…	GO:0005126,cytokine receptor binding|GO:0004175,endopeptidase activity|GO:0019207,kinase regulator activity|GO:0016787,hydrolase activity|GO:0019899,enzyme binding|GO:0044877,macromolecular complex binding|GO:0008047,enzyme activator activity|GO:0004857,enzyme inhibitor activity|GO:0098772,molecular function regulator|GO:0008234,cysteine-type peptidase activity|GO:0005123,death receptor binding|G…	rno04115,p53 signaling pathway|rno05133,Pertussis|rno05134,Legionellosis|rno05010,Alzheimer's disease|rno04933,AGE-RAGE signaling pathway in diabetic complications|rno05012,Parkinson's disease|rno05014,Amyotrophic lateral sclerosis (ALS)|rno05016,Huntington's disease|rno05152,Tuberculosis|rno04932,Non-alcoholic fatty liver disease (NAFLD)|rno05210,Colorectal cancer|rno04650,Natural killer cell me…	15	3	4	2	277	31.5	6.35	5.92	108.8	124	97.5	120	89.1	72.8	92.7	95.2	0.0182144	1.28731
F1M265		Uncharacterized protein OS=Rattus norvegicus OX=10116 PE=1 SV=3	GO:0030154,cell differentiation|GO:0048468,cell development|GO:0030036,actin cytoskeleton organization|GO:0003382,epithelial cell morphogenesis|GO:0030029,actin filament-based process|GO:0008544,epidermis development|GO:0007275,multicellular organism development|GO:0044699,single-organism process|GO:0000904,cell morphogenesis involved in differentiation|GO:0000902,cell morphogenesis|GO:0009653,an…	GO:0015629,actin cytoskeleton|GO:0043229,intracellular organelle|GO:0043228,non-membrane-bounded organelle|GO:0005924,cell-substrate adherens junction|GO:0005925,focal adhesion|GO:0043227,membrane-bounded organelle|GO:0043226,organelle|GO:0030054,cell junction|GO:0030055,cell-substrate junction|GO:0005856,cytoskeleton|GO:0005634,nucleus|GO:0016020,membrane|GO:0005739,mitochondrion|GO:0044430,cyto…			1	1	1	1	1002	108.3	6.84	2.18	104.6	113.2	106.5	126.6	75.7	84.7	86.7	102	0.013733	1.29161
Q2LAP6	Tes	Testin OS=Rattus norvegicus OX=10116 GN=Tes PE=1 SV=1	GO:0042127,regulation of cell proliferation|GO:0008285,negative regulation of cell proliferation|GO:0008283,cell proliferation|GO:0009987,cellular process|GO:0050794,regulation of cellular process|GO:0065007,biological regulation|GO:0044699,single-organism process|GO:0048519,negative regulation of biological process|GO:0050789,regulation of biological process|GO:0048523,negative regulation of cel…	GO:0043229,intracellular organelle|GO:0071944,cell periphery|GO:0005924,cell-substrate adherens junction|GO:0005925,focal adhesion|GO:0043227,membrane-bounded organelle|GO:0043226,organelle|GO:0030054,cell junction|GO:0030055,cell-substrate junction|GO:0005737,cytoplasm|GO:0005634,nucleus|GO:0016020,membrane|GO:0070161,anchoring junction|GO:0005912,adherens junction|GO:0005886,plasma membrane|GO:…	GO:0005488,binding|GO:0043169,cation binding|GO:0005515,protein binding|GO:0046914,transition metal ion binding|GO:0097159,organic cyclic compound binding|GO:0044822,poly(A) RNA binding|GO:0043167,ion binding|GO:0008270,zinc ion binding|GO:0003676,nucleic acid binding|GO:0046872,metal ion binding|GO:1901363,heterocyclic compound binding|GO:0003723,RNA binding		4	1	2	1	419	47.6	7.99	3.46	119.2	106.8	111.5	114.1	87.4	89.2	87.7	84.3	9.01732e-05	1.29547
Q62740	Spp2	Secreted phosphoprotein 24 OS=Rattus norvegicus OX=10116 GN=Spp2 PE=1 SV=2	GO:0032501,multicellular organismal process|GO:0022607,cellular component assembly|GO:0071822,protein complex subunit organization|GO:0044707,single-multicellular organism process|GO:0070271,protein complex biogenesis|GO:0043933,macromolecular complex subunit organization|GO:0071840,cellular component organization or biogenesis|GO:0006461,protein complex assembly|GO:0048771,tissue remodeling|GO:0…	GO:0043234,protein complex|GO:0005576,extracellular region|GO:0032991,macromolecular complex			3	1	1	1	203	23.2	8.09	1.97	107.6	117.8	111.8	115.5	89.6	79.1	91	87.7	0.000277241	1.30311
A0A0G2JSR4	Stat5b	Signal transducer and activator of transcription OS=Rattus norvegicus OX=10116 GN=Stat5b PE=1 SV=1	GO:0007595,lactation|GO:0002706,regulation of lymphocyte mediated immunity|GO:0002705,positive regulation of leukocyte mediated immunity|GO:0042035,regulation of cytokine biosynthetic process|GO:0044281,small molecule metabolic process|GO:0002708,positive regulation of lymphocyte mediated immunity|GO:0051716,cellular response to stimulus|GO:0000003,reproduction|GO:0045137,development of primary s…	GO:0005737,cytoplasm|GO:0043231,intracellular membrane-bounded organelle|GO:0005634,nucleus|GO:0044464,cell part|GO:0005623,cell|GO:0005622,intracellular|GO:0043229,intracellular organelle|GO:0044424,intracellular part|GO:0043227,membrane-bounded organelle|GO:0043226,organelle	GO:0003676,nucleic acid binding|GO:0001012,RNA polymerase II regulatory region DNA binding|GO:0019899,enzyme binding|GO:0001077,transcriptional activator activity, RNA polymerase II core promoter proximal region sequence-specific binding|GO:0001071,nucleic acid binding transcription factor activity|GO:0004871,signal transducer activity|GO:0003677,DNA binding|GO:1901363,heterocyclic compound bindi…		4	2	2	1	786	90	6.05	3.87	117	123	102.2	112.2	90.4	73.2	84.7	97.3	0.00679795	1.31481
Q8CGU6	Ncstn	Nicastrin OS=Rattus norvegicus OX=10116 GN=Ncstn PE=1 SV=1	GO:0044238,primary metabolic process|GO:0016337,single organismal cell-cell adhesion|GO:0009893,positive regulation of metabolic process|GO:0019222,regulation of metabolic process|GO:0033619,membrane protein proteolysis|GO:0042110,T cell activation|GO:0042592,homeostatic process|GO:0032943,mononuclear cell proliferation|GO:0034641,cellular nitrogen compound metabolic process|GO:0006807,nitrogen c…	GO:0000323,lytic vacuole|GO:0005783,endoplasmic reticulum|GO:0044421,extracellular region part|GO:0048770,pigment granule|GO:0043229,intracellular organelle|GO:0071944,cell periphery|GO:0005773,vacuole|GO:0005924,cell-substrate adherens junction|GO:0031988,membrane-bounded vesicle|GO:0043227,membrane-bounded organelle|GO:0043226,organelle|GO:0030054,cell junction|GO:0030055,cell-substrate junctio…	GO:0016787,hydrolase activity|GO:0004175,endopeptidase activity|GO:0003824,catalytic activity|GO:0070011,peptidase activity, acting on L-amino acid peptides|GO:0005488,binding|GO:0005515,protein binding|GO:0008233,peptidase activity	rno05010,Alzheimer's disease|rno04330,Notch signaling pathway	6	2	4	2	708	78.4	5.77	9.49	103.4	104.7	125.2	122	87.7	71.1	93.2	92.7	0.0114285	1.32086
A0A0G2JX36		Uncharacterized protein OS=Rattus norvegicus OX=10116 PE=1 SV=1	GO:0050896,response to stimulus|GO:0002376,immune system process|GO:0002377,immunoglobulin production|GO:0006955,immune response|GO:0002440,production of molecular mediator of immune response	GO:0005576,extracellular region|GO:0005615,extracellular space|GO:0044421,extracellular region part			9	1	1	1	119	13.2	5.39	2.42	106.2	105.2	118.4	125.6	87.1	80.9	93.7	82.9	0.00279288	1.32153
P05964	S100a6	Protein S100-A6 OS=Rattus norvegicus OX=10116 GN=S100a6 PE=1 SV=3	GO:0006810,transport|GO:0006811,ion transport|GO:0009987,cellular process|GO:0051179,localization|GO:0034220,ion transmembrane transport|GO:0044765,single-organism transport|GO:0044763,single-organism cellular process|GO:0044699,single-organism process|GO:0051234,establishment of localization|GO:0055085,transmembrane transport|GO:1902578,single-organism localization	GO:0019897,extrinsic component of plasma membrane|GO:0016020,membrane|GO:0009898,cytoplasmic side of plasma membrane|GO:0019898,extrinsic component of membrane|GO:0043229,intracellular organelle|GO:0071944,cell periphery|GO:0098552,side of membrane|GO:0043227,membrane-bounded organelle|GO:0043226,organelle|GO:0005737,cytoplasm|GO:0001726,ruffle|GO:0042995,cell projection|GO:0031982,vesicle|GO:003…	GO:0022891,substrate-specific transmembrane transporter activity|GO:0043169,cation binding|GO:0022892,substrate-specific transporter activity|GO:0005515,protein binding|GO:0046914,transition metal ion binding|GO:0044548,S100 protein binding|GO:0005215,transporter activity|GO:0008092,cytoskeletal protein binding|GO:0005488,binding|GO:0043167,ion binding|GO:0015075,ion transmembrane transporter act…		25	3	7	3	89	10	5.48	18.38	113.9	113.3	112.9	116	85.4	87.7	81.8	89	3.41054e-06	1.32626
Q4V7F2	Creld1	Cysteine-rich with EGF-like domain protein 1 OS=Rattus norvegicus OX=10116 GN=Creld1 PE=2 SV=1		GO:0044425,membrane part|GO:0016021,integral component of membrane|GO:0016020,membrane|GO:0031224,intrinsic component of membrane	GO:0043169,cation binding|GO:0043167,ion binding|GO:0005488,binding|GO:0046872,metal ion binding|GO:0005509,calcium ion binding		7	2	2	2	420	45.7	5.01	3	111.4	115.1	117.3	112.3	86.9	83.2	85	88.7	4.33087e-06	1.32664
Q920Q0	Palm	Paralemmin-1 OS=Rattus norvegicus OX=10116 GN=Palm PE=1 SV=1	GO:0008104,protein localization|GO:0019220,regulation of phosphate metabolic process|GO:0080090,regulation of primary metabolic process|GO:0019222,regulation of metabolic process|GO:0048585,negative regulation of response to stimulus|GO:0048583,regulation of response to stimulus|GO:0016358,dendrite development|GO:0061024,membrane organization|GO:0008277,regulation of G-protein coupled receptor pr…	GO:0098590,plasma membrane region|GO:0031974,membrane-enclosed lumen|GO:0030424,axon|GO:0030175,filopodium|GO:0043229,intracellular organelle|GO:0071944,cell periphery|GO:0045202,synapse|GO:0098552,side of membrane|GO:0032591,dendritic spine membrane|GO:0032590,dendrite membrane|GO:0030425,dendrite|GO:0043227,membrane-bounded organelle|GO:0043226,organelle|GO:0005737,cytoplasm|GO:0005623,cell|GO:…	GO:0031750,D3 dopamine receptor binding|GO:0050780,dopamine receptor binding|GO:0005488,binding|GO:0005515,protein binding|GO:0001664,G-protein coupled receptor binding|GO:0005102,receptor binding		10	3	3	3	383	41.9	4.91	5.64	102.8	112	122.7	119.3	87.4	85.9	82.8	87.1	0.000765693	1.331
Q6B345	S100a11	Protein S100-A11 OS=Rattus norvegicus OX=10116 GN=S100a11 PE=3 SV=1	GO:0042127,regulation of cell proliferation|GO:0008283,cell proliferation|GO:0009987,cellular process|GO:0050794,regulation of cellular process|GO:0065007,biological regulation|GO:0050789,regulation of biological process|GO:0044699,single-organism process	GO:0005737,cytoplasm|GO:0043231,intracellular membrane-bounded organelle|GO:0005634,nucleus|GO:0044464,cell part|GO:0005623,cell|GO:0005622,intracellular|GO:0043229,intracellular organelle|GO:0044424,intracellular part|GO:0043227,membrane-bounded organelle|GO:0043226,organelle	GO:0043169,cation binding|GO:0048306,calcium-dependent protein binding|GO:0043167,ion binding|GO:0005509,calcium ion binding|GO:0005515,protein binding|GO:0046872,metal ion binding|GO:0005488,binding		35	3	10	3	98	11.1	5.9	17.33	113.8	115.9	116.4	113.2	88.1	82.1	85.3	85.3	9.0841e-07	1.34771
A0A0G2JTG7	Hnrnph1	Heterogeneous nuclear ribonucleoprotein H OS=Rattus norvegicus OX=10116 GN=Hnrnph1 PE=1 SV=1	GO:0080090,regulation of primary metabolic process|GO:0019222,regulation of metabolic process|GO:0031323,regulation of cellular metabolic process|GO:0090304,nucleic acid metabolic process|GO:0034641,cellular nitrogen compound metabolic process|GO:0006807,nitrogen compound metabolic process|GO:0043170,macromolecule metabolic process|GO:0050789,regulation of biological process|GO:1901360,organic cy…	GO:0044464,cell part|GO:0031974,membrane-enclosed lumen|GO:0043229,intracellular organelle|GO:0043227,membrane-bounded organelle|GO:0043226,organelle|GO:0005737,cytoplasm|GO:0031981,nuclear lumen|GO:0005634,nucleus|GO:0016020,membrane|GO:0030529,intracellular ribonucleoprotein complex|GO:0005654,nucleoplasm|GO:0019013,viral nucleocapsid|GO:0019012,virion|GO:0071013,catalytic step 2 spliceosome|GO…	GO:0097159,organic cyclic compound binding|GO:0005488,binding|GO:0003676,nucleic acid binding|GO:1901363,heterocyclic compound binding|GO:0003723,RNA binding		21	6	8	2	449	49.2	6.3	15.17	118.9	100.9	110.4	131.7	83.8	83.8	85.4	85.1	0.00324804	1.36616
Q6AXT8	Sf3a2	Splicing factor 3A subunit 2 OS=Rattus norvegicus OX=10116 GN=Sf3a2 PE=2 SV=1	GO:0016070,RNA metabolic process|GO:0016071,mRNA metabolic process|GO:0044238,primary metabolic process|GO:0044260,cellular macromolecule metabolic process|GO:0006139,nucleobase-containing compound metabolic process|GO:0009987,cellular process|GO:0006725,cellular aromatic compound metabolic process|GO:0010467,gene expression|GO:0044237,cellular metabolic process|GO:0043170,macromolecule metabolic…	GO:0005622,intracellular|GO:0032991,macromolecular complex|GO:0043231,intracellular membrane-bounded organelle|GO:0071013,catalytic step 2 spliceosome|GO:0044464,cell part|GO:0005623,cell|GO:0043226,organelle|GO:0044446,intracellular organelle part|GO:0043229,intracellular organelle|GO:0044428,nuclear part|GO:0044422,organelle part|GO:0044424,intracellular part|GO:0030529,intracellular ribonucleo…	GO:0005488,binding|GO:0043169,cation binding|GO:0046914,transition metal ion binding|GO:0097159,organic cyclic compound binding|GO:0044822,poly(A) RNA binding|GO:0043167,ion binding|GO:0008270,zinc ion binding|GO:0003676,nucleic acid binding|GO:0046872,metal ion binding|GO:1901363,heterocyclic compound binding|GO:0003723,RNA binding	rno03040,Spliceosome	3	1	1	1	471	49.9	9.64	2.74	110.5	124.9	119	113	86.1	78.4	90.8	77.4	0.000309039	1.40487
P23457	Akr1c9	3-alpha-hydroxysteroid dehydrogenase OS=Rattus norvegicus OX=10116 GN=Akr1c9 PE=1 SV=1	GO:0021537,telencephalon development|GO:0021766,hippocampus development|GO:0060322,head development|GO:0021761,limbic system development|GO:0007275,multicellular organism development|GO:0044699,single-organism process|GO:0007417,central nervous system development|GO:0044710,single-organism metabolic process|GO:1901360,organic cyclic compound metabolic process|GO:0071704,organic substance metaboli…	GO:0005737,cytoplasm|GO:0044464,cell part|GO:0005623,cell|GO:0005622,intracellular|GO:0044424,intracellular part	GO:0016229,steroid dehydrogenase activity|GO:0016614,oxidoreductase activity, acting on CH-OH group of donors|GO:0016616,oxidoreductase activity, acting on the CH-OH group of donors, NAD or NADP as acceptor|GO:0003824,catalytic activity|GO:0033764,steroid dehydrogenase activity, acting on the CH-OH group of donors, NAD or NADP as acceptor|GO:0047042,androsterone dehydrogenase (B-specific) activit…		26	6	12	4	322	37	7.09	18.63	120	109.7	123.6	114.2	88.7	80.6	83.9	79.3	0.000101044	1.40602
P47853	Bgn	Biglycan OS=Rattus norvegicus OX=10116 GN=Bgn PE=1 SV=1	GO:0030204,chondroitin sulfate metabolic process|GO:0030203,glycosaminoglycan metabolic process|GO:0044237,cellular metabolic process|GO:0048771,tissue remodeling|GO:1903510,mucopolysaccharide metabolic process|GO:0019800,peptide cross-linking via chondroitin 4-sulfate glycosaminoglycan|GO:0018149,peptide cross-linking|GO:0006807,nitrogen compound metabolic process|GO:0044281,small molecule metab…	GO:0044421,extracellular region part|GO:0031012,extracellular matrix|GO:0043229,intracellular organelle|GO:0071944,cell periphery|GO:0030133,transport vesicle|GO:0043227,membrane-bounded organelle|GO:0043226,organelle|GO:0005737,cytoplasm|GO:0070062,extracellular exosome|GO:0016023,cytoplasmic, membrane-bounded vesicle|GO:0031410,cytoplasmic vesicle|GO:0016020,membrane|GO:0031988,membrane-bounded…	GO:0005539,glycosaminoglycan binding|GO:0097367,carbohydrate derivative binding|GO:0005488,binding|GO:0050840,extracellular matrix binding|GO:0019210,kinase inhibitor activity|GO:0019207,kinase regulator activity|GO:0019887,protein kinase regulator activity|GO:0030234,enzyme regulator activity|GO:0004860,protein kinase inhibitor activity|GO:0004857,enzyme inhibitor activity|GO:0098772,molecular f…		36	10	18	10	369	41.7	7.52	51.02	116.7	116.3	119.2	119.4	82	80.9	81.2	84.4	6.81316e-08	1.43562
D3ZM97	Olr1121	Olfactory receptor OS=Rattus norvegicus OX=10116 GN=Olr1121 PE=3 SV=1	GO:0009593,detection of chemical stimulus|GO:0050906,detection of stimulus involved in sensory perception|GO:0007165,signal transduction|GO:0042221,response to chemical|GO:0050789,regulation of biological process|GO:0044699,single-organism process|GO:0051716,cellular response to stimulus|GO:0065007,biological regulation|GO:0007186,G-protein coupled receptor signaling pathway|GO:0032501,multicellu…	GO:0016021,integral component of membrane|GO:0016020,membrane|GO:0044464,cell part|GO:0005623,cell|GO:0071944,cell periphery|GO:0005886,plasma membrane|GO:0044425,membrane part|GO:0031224,intrinsic component of membrane	GO:0004930,G-protein coupled receptor activity|GO:0038023,signaling receptor activity|GO:0060089,molecular transducer activity|GO:0004888,transmembrane signaling receptor activity|GO:0004872,receptor activity|GO:0004871,signal transducer activity|GO:0004984,olfactory receptor activity|GO:0099600,transmembrane receptor activity	rno04740,Olfactory transduction	2	1	2	1	313	34.8	8.79	5.38	118	113.5	132.1	110	90.6	73.5	73.4	89	0.00162213	1.45054
P29826	RT1-Bb	Rano class II histocompatibility antigen, B-1 beta chain OS=Rattus norvegicus OX=10116 GN=RT1-Bb PE=2 SV=1	GO:0042130,negative regulation of T cell proliferation|GO:0034111,negative regulation of homotypic cell-cell adhesion|GO:0034110,regulation of homotypic cell-cell adhesion|GO:0007162,negative regulation of cell adhesion|GO:0071312,cellular response to alkaloid|GO:0051716,cellular response to stimulus|GO:0043207,response to external biotic stimulus|GO:0009610,response to symbiotic fungus|GO:007066…	GO:0042611,MHC protein complex|GO:0043234,protein complex|GO:0042613,MHC class II protein complex|GO:0032991,macromolecular complex|GO:0016021,integral component of membrane|GO:0016020,membrane|GO:0044464,cell part|GO:0005623,cell|GO:0098797,plasma membrane protein complex|GO:0098796,membrane protein complex|GO:0071944,cell periphery|GO:0005886,plasma membrane|GO:0044425,membrane part|GO:0044459,…	GO:0046983,protein dimerization activity|GO:0046982,protein heterodimerization activity|GO:0005488,binding|GO:0005515,protein binding		11	3	3	3	263	29.9	7.46	6.6	117.6	111.8	121.8	123.6	76.1	86.4	81.3	81.4	3.13613e-05	1.46002
Q5MYW5	Oas1a	2'-5' oligoadenylate synthetase 1G OS=Rattus norvegicus OX=10116 GN=Oas1a PE=1 SV=1	GO:0009607,response to biotic stimulus|GO:0002376,immune system process|GO:0044249,cellular biosynthetic process|GO:0034641,cellular nitrogen compound metabolic process|GO:0009165,nucleotide biosynthetic process|GO:0044281,small molecule metabolic process|GO:0072521,purine-containing compound metabolic process|GO:0072522,purine-containing compound biosynthetic process|GO:1901362,organic cyclic co…		GO:0035639,purine ribonucleoside triphosphate binding|GO:0005488,binding|GO:0003676,nucleic acid binding|GO:0043167,ion binding|GO:1901363,heterocyclic compound binding|GO:1901265,nucleoside phosphate binding|GO:0043168,anion binding|GO:0000166,nucleotide binding|GO:0016740,transferase activity|GO:0017076,purine nucleotide binding|GO:0005524,ATP binding|GO:0036094,small molecule binding|GO:000382…		3	1	1	1	367	42.6	8.81	3.05	113.8	110.2	126.2	132.8	88.8	69.9	76.8	81.5	0.000758888	1.52366
F1M7Z2	Iqca	IQ and AAA domain-containing protein 1 OS=Rattus norvegicus OX=10116 GN=Iqca PE=4 SV=3			GO:0043168,anion binding|GO:0005488,binding|GO:0030554,adenyl nucleotide binding|GO:0035639,purine ribonucleoside triphosphate binding|GO:0097367,carbohydrate derivative binding|GO:1901363,heterocyclic compound binding|GO:1901265,nucleoside phosphate binding|GO:0000166,nucleotide binding|GO:0036094,small molecule binding|GO:0032553,ribonucleotide binding|GO:0032559,adenyl ribonucleotide binding|G…		1	1	1	1	852	99.3	9.44	1.88	122.7	115.5	124	121.8	77.4	80.6	76.9	81	1.21445e-06	1.53213
P81827		Urinary protein 1 OS=Rattus norvegicus OX=10116 PE=1 SV=1		GO:0005576,extracellular region			11	1	1	1	101	11	7.05	2.83	122.4	124.2	120.9	117.3	77.4	79.7	77	81.2	3.46426e-07	1.53758
Q9TQA6	RT1-Db1	Class II MHC RT1.D(N) beta chain OS=Rattus norvegicus OX=10116 GN=RT1-Db1 PE=1 SV=1	GO:0002504,antigen processing and presentation of peptide or polysaccharide antigen via MHC class II|GO:0019882,antigen processing and presentation|GO:0019884,antigen processing and presentation of exogenous antigen|GO:0019886,antigen processing and presentation of exogenous peptide antigen via MHC class II|GO:0050896,response to stimulus|GO:0002478,antigen processing and presentation of exogenou…	GO:0042611,MHC protein complex|GO:0043234,protein complex|GO:0042613,MHC class II protein complex|GO:0032991,macromolecular complex|GO:0016021,integral component of membrane|GO:0016020,membrane|GO:0044464,cell part|GO:0005623,cell|GO:0098797,plasma membrane protein complex|GO:0098796,membrane protein complex|GO:0071944,cell periphery|GO:0005886,plasma membrane|GO:0044425,membrane part|GO:0044459,…		rno05150,Staphylococcus aureus infection|rno04145,Phagosome|rno05152,Tuberculosis|rno05140,Leishmaniasis|rno05321,Inflammatory bowel disease (IBD)|rno05145,Toxoplasmosis|rno04940,Type I diabetes mellitus|rno05310,Asthma|rno04514,Cell adhesion molecules (CAMs)|rno05332,Graft-versus-host disease|rno05168,Herpes simplex infection|rno05416,Viral myocarditis|rno05323,Rheumatoid arthritis|rno05322,Syst…	3	1	1	1	264	30.2	7.74	1.95	131.6	126.9	134.9	127.9	67.9	65.5	74.8	70.5	5.13084e-07	1.87047
F8WGA3	Serpinb1b	Serine (or cysteine) peptidase inhibitor, clade B, member 1b OS=Rattus norvegicus OX=10116 GN=Serpinb1b PE=3 SV=3	GO:0009892,negative regulation of metabolic process|GO:0080090,regulation of primary metabolic process|GO:0019222,regulation of metabolic process|GO:0031324,negative regulation of cellular metabolic process|GO:0031323,regulation of cellular metabolic process|GO:0043086,negative regulation of catalytic activity|GO:0044267,cellular protein metabolic process|GO:0051248,negative regulation of protein…	GO:0005576,extracellular region|GO:0005615,extracellular space|GO:0044421,extracellular region part	GO:0004866,endopeptidase inhibitor activity|GO:0061135,endopeptidase regulator activity|GO:0061134,peptidase regulator activity|GO:0030414,peptidase inhibitor activity|GO:0004867,serine-type endopeptidase inhibitor activity|GO:0004857,enzyme inhibitor activity|GO:0098772,molecular function regulator|GO:0030234,enzyme regulator activity		2	1	1	1	378	42.6	6.42	2.24	131	117.1	118.4	179.2	63.3	56.2	68.6	66.2	0.00268981	2.14589
